# Supplementary material for: Visible light promoted fluoroalkylation of alkenes and alkynes using 2-bromophenol as a catalyst
Source: Royal Society of Chemistry journal article supplement (doi:10.1039/c9cc06587c), 2019-01-01

Supporting Information for

# Visible Light Promoted Fluoroalkylation of Alkenes and Alkynes Using 2-Bromophenol as a Catalyst

Erlin Zhu,<sup>†,§</sup> Xiao-Xiao Liu,<sup>†,§</sup> An-Jun Wang,<sup>†</sup> Ting Mao,<sup>†</sup> Liang Zhao,<sup>†,\*</sup> Xingang Zhang<sup>‡,\*</sup> and Chun-Yang He<sup>†,\*</sup>

<sup>§</sup> E. Zhu and X.-X. Liu Contributed equally to this work

<sup>†</sup>Key Laboratory of Biocatalysis & Chiral Drug Synthesis of Guizhou Province, Generic Drug Research Center of Guizhou Province, Zunyi Medical University, Zunyi 563003, P. R. China

<sup>‡</sup>Key Laboratory of Organofluorine Chemistry, Shanghai Institute of Organic Chemistry, Chinese Academy of Sciences Shanghai 200032, P. R. China

## List of Contents

|                                               |     |
|-----------------------------------------------|-----|
| 1) General information                        | S03 |
| 2) General procedure                          | S03 |
| 3) Optimization                               | S05 |
| 4) Data for compounds <b>3, 5, 6, 7</b>       | S06 |
| 5) References                                 | S29 |
| 6) Mechanism studies                          | S30 |
| 7) Copies of NMR spectra of <b>3, 5, 6, 7</b> | S37 |

## 1. General information.

<sup>1</sup>H NMR spectra were recorded on an Agilent NMR system (400 MHz). <sup>19</sup>F NMR was recorded on an Agilent NMR spectrometer (376 MHz, CFC1<sub>3</sub> as outside standard and low field is positive). Chemical shifts ( $\delta$ ) are reported in ppm, and coupling constants ( $J$ ) are in Hertz (Hz). The following abbreviations were used to explain the multiplicities: s = singlet, d = doublet, t = triplet, q = quartet, m = multiplet, br = broad. NMR yield was determined by <sup>19</sup>F NMR using fluorobenzene as an internal standard before working up the reaction.

**Materials:** All reagents were used as received from commercial sources, unless specified otherwise, or prepared as described in the literature. All reagents were weighed and handled in air at room temperature. LEDs with short wavelength (450-455 nm, 460-465 nm, 480-485 nm, 495-500 nm, 510-515 nm, 530-535 nm) were purchased from WATTCAS<sup>TM</sup>, and relevant experiments were performed in a WP-TEC-1020SL parallel reactor from WATTCAS<sup>TM</sup>.

## 2. General procedure.

**2.1 General procedure for visible light promoted fluoroalkylation of alkenes and alkynes using 2-bromophenol as a catalyst.** To a 25 mL of Schlenk tube equipped with a Teflon septum were added KOAc (0.6 mmol, 2.0 equiv) under Ar, followed by DCE (2 mL) with stirring. Alkene (**1**)/alkyne (**4**) (0.3 mmol, 1.0 equiv), 2-bromophenol (0.03 mmol, 0.1 equiv), and IR<sub>f</sub> (**2**) (0.6 mmol, 2.0 equiv) were added subsequently. The tube was then irradiated with 12 W blue LEDs (430 nm-490 nm). After stirring for 16 h, the solvent was removed and the residue was purified with silica gel chromatography to provide pure product.

**2.2 General procedure for visible light promoted fluoroalkylation of allylphenols. (Table 2, 3o-3r).** To a 25 mL of Schlenk tube equipped with a Teflon septum were added KOAc (0.6 mmol, 2.0 equiv) under Ar, followed by dioxane (2 mL) with stirring. Allylphenol (**1**) (0.3 mmol, 1.0 equiv) and ICF<sub>2</sub>COOEt (**2a**) (0.6 mmol, 2.0 equiv) were added subsequently. The tube was then irradiated with 12 W blue LEDs (430 nm-490 nm). After stirring for 16 h, the solvent was removed and the residue was purified with silica gel chromatography to provide pure product.

**2.3 General procedure for the Heck-type reaction of R<sub>f</sub>I with alkenes (Table 4, 6a-6h).** To a 25

mL of Schlenk tube equipped with a Teflon septum were added  $K_2CO_3$  (0.6 mmol, 2.0 equiv) under Ar, followed by DMSO (2 mL) with stirring. Alkenes (**1**) (0.3 mmol, 1.0 equiv), 2-bromophenol (0.03 mmol, 0.1 equiv), and  $ICF_2COOEt$  (**2a**) (0.6 mmol, 2.0 equiv) were added subsequently. The tube was then irradiated with 12 W blue LEDs (430 nm-490 nm). After stirring for 16 h, the residue was diluted with ethyl acetate, washed with  $H_2O$  and brine, dried over  $Na_2SO_4$ , filtered and concentrated. The residue was purified with silica gel chromatography to provide pure product.

**2.4 General procedure for the Heck-type reaction of  $R_fI$  with allylphenols. (Table 4, 6i-6q).** To a 25 mL of Schlenk tube equipped with a Teflon septum were added KOAc (0.9 mmol, 3.0 equiv) under Ar, followed by DCM/DMSO (v/v=3:1) (2 mL) with stirring. Allylphenol (**1**) (0.3 mmol, 1.0 equiv) and  $IR_f$  (**2**) (0.6 mmol, 2.0 equiv) were added subsequently. The tube was then irradiated with 12 W blue LEDs (430 nm-490 nm). After stirring for 14 h, the residue was diluted with ethyl acetate, washed with  $H_2O$  and brine, dried over  $Na_2SO_4$ , filtered and concentrated. The residue was purified with silica gel chromatography to provide pure product.

**2.5 General procedure for visible light promoted difluoroalkylation of allylphenols (Table 5, 7a-7e).** To a 25 mL of Schlenk tube equipped with a Teflon septum were added  $K_2CO_3$  (0.6 mmol, 2.0 equiv) under Ar, followed by THF (2 mL) with stirring. Allylphenol (**1**) (0.3 mmol, 1.0 equiv) and  $ICF_2COOEt$  (**2a**) (0.6 mmol, 2.0 equiv) were added subsequently. The tube was then irradiated with 12 W blue LEDs (430 nm-490 nm). After stirring for 16 h, the solvent was removed and the residue was purified with silica gel chromatography to provide pure product.

### 3. Optimization.

Reaction optimization table of visible-light promoted difluoroalkylation of allylbenzene (**1a**)

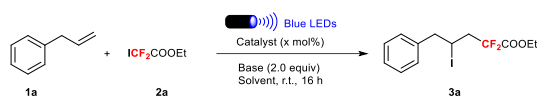

| Entry           | Wavelength (nm) | Catalyst (x mol%)                                         | Base                            | Solvent | Yield (%), <b>3a</b> <sup>b</sup> |
|-----------------|-----------------|-----------------------------------------------------------|---------------------------------|---------|-----------------------------------|
| 1               | 430-490         | ----                                                      | K <sub>2</sub> CO <sub>3</sub>  | Dioxane | ----                              |
| 2               | 430-490         | PhOH (10)                                                 | K <sub>2</sub> CO <sub>3</sub>  | Dioxane | 68                                |
| 3               | 430-490         | PhOH (10)                                                 | Cs <sub>2</sub> CO <sub>3</sub> | Dioxane | 64                                |
| 4               | 430-490         | PhOH (10)                                                 | Na <sub>2</sub> CO <sub>3</sub> | Dioxane | 31                                |
| 5               | 430-490         | PhOH (10)                                                 | KOAc                            | Dioxane | 73                                |
| 6               | 430-490         | PhOH (10)                                                 | NaOAc                           | Dioxane | 60                                |
| 7               | 430-490         | 2-Br-C <sub>6</sub> H <sub>4</sub> OH (10)                | KOAc                            | Dioxane | 85                                |
| 8               | 430-490         | 4-Br-C <sub>6</sub> H <sub>4</sub> OH (10)                | KOAc                            | Dioxane | 74                                |
| 9               | 430-490         | 2-Cl-C <sub>6</sub> H <sub>4</sub> OH (10)                | KOAc                            | Dioxane | 65                                |
| 10              | 430-490         | 4-CF <sub>3</sub> O-C <sub>6</sub> H <sub>4</sub> OH (10) | KOAc                            | Dioxane | 20                                |
| 11              | 430-490         | 2-Me-C <sub>6</sub> H <sub>4</sub> OH (10)                | KOAc                            | Dioxane | 63                                |
| 12              | 430-490         | Catechol (10)                                             | KOAc                            | Dioxane | 73                                |
| 13              | 430-490         | 2-MeO-C <sub>6</sub> H <sub>4</sub> OH (10)               | KOAc                            | Dioxane | 72                                |
| 14              | 430-490         | 2-Br-C <sub>6</sub> H <sub>4</sub> OH (10)                | KOAc                            | MeCN    | 65                                |
| 15              | 430-490         | 2-Br-C <sub>6</sub> H <sub>4</sub> OH (10)                | KOAc                            | DMSO    | ----                              |
| 16              | 430-490         | 2-Br-C <sub>6</sub> H <sub>4</sub> OH (10)                | KOAc                            | Toluene | 12                                |
| 17              | 430-490         | 2-Br-C <sub>6</sub> H <sub>4</sub> OH (10)                | KOAc                            | DCE     | 92 (88)                           |
| 18              | 430-490         | 2-Br-C <sub>6</sub> H <sub>4</sub> OH (5)                 | KOAc                            | DCE     | 79                                |
| 19 <sup>c</sup> | 430-490         | 2-Br-C <sub>6</sub> H <sub>4</sub> OH (10)                | KOAc                            | DCE     | ----                              |
| 20              | 430-490         | 2-Br-C <sub>6</sub> H <sub>4</sub> OH (10)                | ----                            | DCE     | 7                                 |
| 21              | 430-490         | ----                                                      | KOAc                            | DCE     | 44                                |
| 22              | 450-455         | 2-Br-C <sub>6</sub> H <sub>4</sub> OH (10)                | KOAc                            | DCE     | 87                                |
| 23              | 460-465         | 2-Br-C <sub>6</sub> H <sub>4</sub> OH (10)                | KOAc                            | DCE     | 83                                |
| 24              | 480-485         | 2-Br-C <sub>6</sub> H <sub>4</sub> OH (10)                | KOAc                            | DCE     | 88                                |
| 25              | 495-500         | 2-Br-C <sub>6</sub> H <sub>4</sub> OH (10)                | KOAc                            | DCE     | 57                                |
| 26              | 510-515         | 2-Br-C <sub>6</sub> H <sub>4</sub> OH (10)                | KOAc                            | DCE     | 14                                |
| 27              | 530-535         | 2-Br-C <sub>6</sub> H <sub>4</sub> OH (10)                | KOAc                            | DCE     | ----                              |

<sup>a</sup>Reaction conditions (unless otherwise specified): **1a** (0.3 mmol, 1.0 equiv), **2a** (0.6 mmol, 2.0 equiv), catalyst (0.03 mmol, 0.1 equiv), solvent (2.0 mL), 12 W blue LEDs, room temperature, 16 h.

<sup>b</sup>NMR yield was determined by <sup>19</sup>F NMR using fluorobenzene as internal standard and number in parentheses is an isolated product yield. <sup>c</sup>The reaction was performed without light.

#### 4. Data for compounds 3, 5, 6, 7.

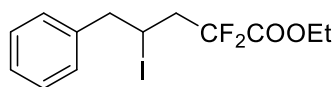

**Ethyl 2,2-difluoro-4-iodo-5-phenylpentanoate (3a).** This compound is known.<sup>1</sup> The product (97 mg, 88% yield) was purified with silica gel chromatography (Petroleum ether/Ethyl acetate = 80:1) as colorless liquid. <sup>1</sup>H NMR (400 MHz, CDCl<sub>3</sub>) δ 7.40-7.30 (m, 3H), 7.20 (d, *J* = 8.0 Hz, 2H), 4.40-4.35 (m, 1H), 4.34 (q, *J* = 7.2 Hz, 2H), 3.30-3.18 (m, 2H), 3.05-2.70 (m, 2H), 1.37 (t, *J* = 7.2 Hz, 3H). <sup>19</sup>F NMR (376 MHz, CDCl<sub>3</sub>) δ -101.3 – -102.3 (m, 1F), -106.0 – -106.9 (m, 1F). <sup>13</sup>C NMR (101 MHz, CDCl<sub>3</sub>) δ 163.3 (t, *J* = 32.5 Hz), 138.7, 128.9, 128.5, 127.1, 115.1 (t, *J* = 254.6 Hz), 63.2, 47.1, 44.2 (t, *J* = 23.5 Hz), 21.9 (t, *J* = 3.8 Hz), 13.8.

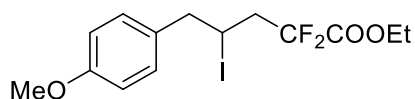

**Ethyl 2,2-difluoro-4-iodo-5-(4-methoxyphenyl)pentanoate (3b).** The product (85 mg, 71% yield) was purified with silica gel chromatography (Petroleum ether/Ethyl acetate = 100:1) as pale yellow liquid. <sup>1</sup>H NMR (400 MHz, CDCl<sub>3</sub>) δ 7.11 (d, *J* = 8.6 Hz, 2H), 6.86 (d, *J* = 8.6 Hz, 2H), 4.34 (q, *J* = 7.2 Hz, 2H), 4.29 (m, 1H), 3.80 (s, 3H), 3.17-3.15 (m, 2H), 2.96-2.70 (m, 2H), 1.36 (t, *J* = 7.2 Hz, 3H). <sup>19</sup>F NMR (376 MHz, CDCl<sub>3</sub>) δ -101.3 – -102.1 (m, 1F), -106.1 – -106.9 (m, 1F). <sup>13</sup>C NMR (101 MHz, CDCl<sub>3</sub>) δ 163.4 (t, *J* = 32.5 Hz), 158.6, 130.8, 130.0, 115.2 (t, *J* = 253.7 Hz), 113.9, 63.2, 55.2, 46.3, 44.1 (t, *J* = 23.5 Hz), 22.7 (t, *J* = 3.7 Hz), 13.8. MS (ESI): *m/z* 399 (M+H)<sup>+</sup>. HRMS (ESI): Calculated for C<sub>14</sub>H<sub>18</sub>F<sub>2</sub>IO<sub>3</sub> (M+H)<sup>+</sup>: 399.0263; Found: 399.0262.

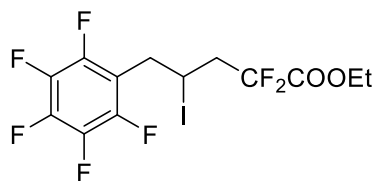

**Ethyl 2,2-difluoro-4-iodo-5-(perfluorophenyl)pentanoate (3c).** The product (124 mg, 90% yield) was purified with silica gel chromatography (Petroleum ether/Ethyl acetate = 100:1) as pale yellow

liquid.  $^1\text{H}$  NMR (400 MHz,  $\text{CDCl}_3$ )  $\delta$  4.45-4.30 (m, 1H), 4.36 (q,  $J = 7.2$  Hz, 2H), 3.45-3.30 (m, 2H), 3.10-2.90 (m, 1H), 2.86-2.73 (m, 1H), 1.38 (t,  $J = 7.0$  Hz, 3H).  $^{19}\text{F}$  NMR (376 MHz,  $\text{CDCl}_3$ )  $\delta$  -101.2 – -102.3 (m, 1F), -106.0 – -106.9 (m, 1F), -142.2 (dd,  $J = 21.8$  Hz, 8.3 Hz, 2F), -154.8 (t,  $J = 20.3$  Hz, 1F), -161.8 (m, 2F).  $^{13}\text{C}$  NMR (101 MHz,  $\text{CDCl}_3$ )  $\delta$  163.2 (t,  $J = 32.2$  Hz), 145.1 (dm,  $J = 251.4$  Hz), 140.5 (dm,  $J = 255.3$  Hz), 137.6 (dm,  $J = 253.9$  Hz), 114.9 (t,  $J = 255.1$  Hz), 113.1 (m), 63.5, 45.1 (t,  $J = 23.5$  Hz), 33.8, 16.7, 13.8. MS (EI):  $m/z$  (%) 331 (100), (M-I) $^+$ , 303, 257. HRMS (EI): Calculated for  $\text{C}_{13}\text{H}_{10}\text{F}_7\text{O}_2$  (M-I) $^+$ : 331.0569; Found: 331.0566.

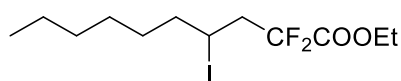

**Ethyl 2, 2-difluoro-4-iododecanoate (3d).** This compound is known.<sup>2</sup> The product (102 mg, 94% yield) was purified with silica gel chromatography (Petroleum ether/Ethyl acetate = 100:1) as colorless liquid.  $^1\text{H}$  NMR (400 MHz,  $\text{CDCl}_3$ )  $\delta$  4.34 (q,  $J = 7.2$  Hz, 2H), 4.25-4.18 (m, 1H), 2.98-2.84 (m, 1H), 2.79-2.66 (m, 1H), 1.85-1.68 (m, 2H), 1.55-1.46 (m, 1H), 1.37 (t,  $J = 7.2$  Hz, 3H), 1.36-1.25 (m, 7H), 0.88 (t,  $J = 6.8$  Hz, 3H).  $^{19}\text{F}$  NMR (376 MHz,  $\text{CDCl}_3$ )  $\delta$  -101.5 – -102.6 (m, 1F), -106.4 – -107.3 (m, 1F).  $^{13}\text{C}$  NMR (101 MHz,  $\text{CDCl}_3$ )  $\delta$  163.4 (t,  $J = 32.7$  Hz), 115.2 (t,  $J = 253.4$  Hz), 63.2, 45.3 (t,  $J = 23.3$  Hz), 40.4, 31.5, 29.4, 28.2, 23.3 (t,  $J = 3.9$  Hz), 22.5, 14.0, 13.9.

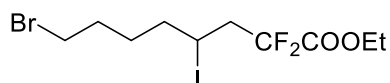

**Ethyl 8-bromo-2,2-difluoro-4-iodooctanoate (3e).** The product (113 mg, 91% yield) was purified with silica gel chromatography (Petroleum ether/Ethyl acetate = 50:1) as colorless liquid.  $^1\text{H}$  NMR (400 MHz,  $\text{CDCl}_3$ )  $\delta$  4.34 (q,  $J = 7.2$  Hz, 2H), 4.25-4.19 (m, 1H), 3.41 (t,  $J = 6.6$  Hz, 2H), 2.99-2.85 (m, 1H), 2.81-2.67 (m, 1H), 1.96-1.65 (m, 5H), 1.60-1.50 (m, 1H), 1.37 (t,  $J = 7.2$  Hz, 3H).  $^{19}\text{F}$  NMR (376 MHz,  $\text{CDCl}_3$ )  $\delta$  -101.6 – -102.6 (m, 1F), -106.3 – -107.3 (m, 1F).  $^{13}\text{C}$  NMR (101 MHz,  $\text{CDCl}_3$ )  $\delta$  163.3 (t,  $J = 32.3$  Hz), 115.1 (t,  $J = 254.1$  Hz), 63.3, 45.2 (t,  $J = 23.2$  Hz), 39.4, 33.1, 31.6, 28.2, 22.2 (t,  $J = 3.7$  Hz), 13.9. MS (ESI):  $m/z$  415 (M $^+$ +H), 413 (M+H) $^+$ . HRMS (ESI): Calculated for  $\text{C}_{10}\text{H}_{17}\text{F}_2\text{O}_2\text{BrI}$  (M+H) $^+$ : 412.9419; Found: 412.9419.

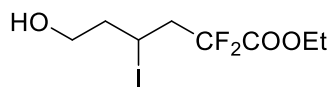

**Ethyl 2,2-difluoro-6-hydroxy-4-iodohexanoate (3f).** The product (80 mg, 83% yield) was purified with silica gel chromatography (Petroleum ether/Ethyl acetate = 20:1) as colorless liquid.  $^1\text{H}$  NMR (400 MHz,  $\text{CDCl}_3$ )  $\delta$  4.42-4.35 (m, 1H), 4.33 (q,  $J = 7.2$  Hz, 2H), 3.88-3.68 (m, 2H), 3.05-2.70 (m, 2H), 2.00 (q,  $J = 6.1$  Hz, 2H), 1.90 (s, 1H), 1.36 (t,  $J = 7.2$  Hz, 3H).  $^{19}\text{F}$  NMR (376 MHz,  $\text{CDCl}_3$ )  $\delta$  -101.4 – -102.4 (m, 1F), -105.8 – -106.8 (m, 1F).  $^{13}\text{C}$  NMR (101 MHz,  $\text{CDCl}_3$ )  $\delta$  163.4 (t,  $J = 32.5$  Hz), 115.1 (t,  $J = 254.0$  Hz), 63.3, 62.3, 45.4 (t,  $J = 23.3$  Hz), 42.4, 19.0 (t,  $J = 4.1$  Hz), 13.8. MS (ESI):  $m/z$  323 ( $\text{M}+\text{H}$ ) $^+$ , 305. HRMS (ESI): Calculated for  $\text{C}_8\text{H}_{14}\text{F}_2\text{O}_3\text{I}$  ( $\text{M}+\text{H}$ ) $^+$ : 322.9950; Found: 322.9950.

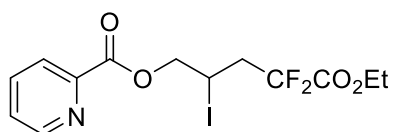

**5-Ethoxy-4,4-difluoro-2-iodo-5-oxopentyl picolinate (3g).** The product (81 mg, 65% yield) was purified with silica gel chromatography (Petroleum ether/Ethyl acetate = 10:1) as colorless liquid.  $^1\text{H}$  NMR (400 MHz,  $\text{CDCl}_3$ )  $\delta$  8.77 (d,  $J = 4.0$ , 1H), 8.13 (d,  $J = 7.6$  Hz, 1H), 7.86 (m, 1H), 7.51-7.48 (m, 1H), 4.71-4.67 (m, 1H), 4.58-4.46 (m, 2H), 4.32 (q,  $J = 7.2$  Hz, 2H), 3.03-2.81 (m, 2H), 1.34 (t,  $J = 7.2$  Hz, 3H).  $^{19}\text{F}$  NMR (376 MHz,  $\text{CDCl}_3$ )  $\delta$  -102.2 – -103.4 (m, 1F), -105.6 – -106.6 (m, 1F).  $^{13}\text{C}$  NMR (101 MHz,  $\text{CDCl}_3$ )  $\delta$  164.0, 163.1 (t,  $J = 32.3$  Hz), 150.1, 147.2, 137.1, 127.2, 125.4, 114.7 (t,  $J = 254.2$  Hz), 69.6, 63.4, 41.6 (t,  $J = 23.9$  Hz), 14.2 (t,  $J = 4.0$  Hz), 13.8. MS (ESI):  $m/z$  414 ( $\text{M}+\text{H}$ ) $^+$ . HRMS (ESI): Calculated for  $\text{C}_{13}\text{H}_{15}\text{F}_2\text{O}_4\text{IN}$  ( $\text{M}+\text{H}$ ) $^+$ : 414.0008; Found: 414.0007.

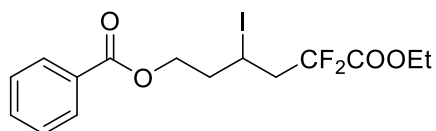



**6-Ethoxy-5,5-difluoro-3-iodo-6-oxohexyl benzoate (3h).** The product (104 mg, 81% yield) was purified with silica gel chromatography (Petroleum ether/Ethyl acetate = 20:1) as colorless liquid.  $^1\text{H}$  NMR (400 MHz,  $\text{CDCl}_3$ )  $\delta$  8.02 (d,  $J = 7.6$  Hz, 2H), 7.56 (t,  $J = 7.2$  Hz, 1H), 7.44 (t,  $J = 7.6$  Hz, 2H), 4.57-4.52 (m, 1H), 4.45-4.35 (m, 2H), 4.32 (q,  $J = 7.2$  Hz, 2H), 3.07-2.78 (m, 2H), 2.36-2.18 (m, 2H), 1.34 (t,  $J = 7.2$  Hz, 3H).  $^{19}\text{F}$  NMR (376 MHz,  $\text{CDCl}_3$ )  $\delta$  -101.4 – -102.4 (m, 1F), -106.1 – -107.1 (m, 1F).  $^{13}\text{C}$  NMR (101 MHz,  $\text{CDCl}_3$ )  $\delta$  166.1, 163.1 (t,  $J = 32.4$  Hz), 133.0, 129.8, 129.5, 128.3, 115.0 (t,  $J = 254.3$  Hz), 64.4, 63.2, 45.3 (t,  $J = 23.2$  Hz), 38.9, 17.4 (t,  $J = 3.9$  Hz), 13.8. MS (ESI):  $m/z$  427 ( $\text{M}+\text{H}$ ) $^+$ . HRMS (ESI): Calculated for  $\text{C}_{15}\text{H}_{18}\text{F}_2\text{O}_4\text{I}$  ( $\text{M}+\text{H}$ ) $^+$ : 427.0212; Found: 427.0212.

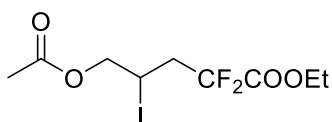

**Ethyl 5-acetoxy-2,2-difluoro-4-iodopentanoate (3i).** The product (91 mg, 87% yield) was purified with silica gel chromatography (Petroleum ether/Ethyl acetate = 20:1) as colorless liquid.  $^1\text{H}$  NMR (400 MHz,  $\text{CDCl}_3$ )  $\delta$  4.37-4.28 (m, 4H), 4.28-4.20 (m, 1H), 2.92-2.72 (m, 2H), 2.10 (s, 3H), 1.36 (t,  $J = 7.2$  Hz, 3H).  $^{19}\text{F}$  NMR (376 MHz,  $\text{CDCl}_3$ )  $\delta$  -102.7 – -103.6 (m, 1F), -105.7 – -106.4 (m, 1F).  $^{13}\text{C}$  NMR (101 MHz,  $\text{CDCl}_3$ )  $\delta$  170.0, 163.1 (t,  $J = 32.2$  Hz), 114.7 (t,  $J = 254.0$  Hz), 68.5, 63.3, 41.7 (t,  $J = 23.9$  Hz), 20.7, 14.5 (t,  $J = 4.1$  Hz), 13.8. MS (ESI):  $m/z$  368 ( $\text{M}+\text{NH}_4$ ) $^+$ . HRMS (ESI): Calculated for  $\text{C}_9\text{H}_{17}\text{NF}_2\text{O}_4\text{I}$  ( $\text{M}+\text{NH}_4$ ) $^+$ : 368.0165; Found: 368.0163.

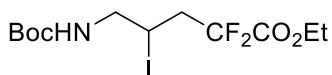

**Ethyl 5-((tert-butoxycarbonyl)amino)-2,2-difluoro-4-iodopentanoate (3j).** The product (103 mg, 84% yield) was purified with silica gel chromatography (Petroleum ether/Ethyl acetate = 10:1) as colorless liquid.  $^1\text{H}$  NMR (400 MHz,  $\text{CDCl}_3$ )  $\delta$  4.98 (br, 1H), 4.34 (q,  $J = 6.8$  Hz, 2H), 4.32-4.24 (m, 1H), 3.60-3.35 (m, 2H), 2.90-2.70 (m, 2H), 1.44 (s, 9H), 1.36 (t,  $J = 7.2$  Hz, 3H).  $^{19}\text{F}$  NMR (376 MHz,  $\text{CDCl}_3$ )  $\delta$  -102.0 – -103.0 (m, 1F), -105.7 – -106.7 (m, 1F).  $^{13}\text{C}$  NMR (101 MHz,  $\text{CDCl}_3$ )  $\delta$

163.2 (t,  $J = 32.8$  Hz), 155.5, 114.9 (t,  $J = 253.2$  Hz), 80.0, 63.3, 48.9, 42.1 (t,  $J = 23.8$  Hz), 28.2, 21.1, 13.8. MS (ESI):  $m/z$  408 (M+H)<sup>+</sup>. HRMS (ESI): Calculated for C<sub>12</sub>H<sub>21</sub>NF<sub>2</sub>O<sub>4</sub>I (M+H)<sup>+</sup>: 408.0478; Found: 408.0477.

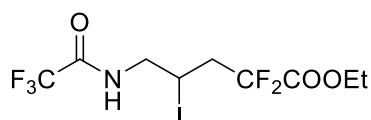

**Ethyl 2,2-difluoro-4-iodo-5-(2,2,2-trifluoroacetamido)pentanoate (3k).** The product (87 mg, 72% yield) was purified with silica gel chromatography (Petroleum ether/Ethyl acetate = 10:1) as colorless liquid. <sup>1</sup>H NMR (400 MHz, CDCl<sub>3</sub>) δ 6.98 (br, 1H), 4.40-4.30 (m, 3H), 3.90-3.50 (m, 2H), 3.00-2.68 (m, 2H), 1.37 (t,  $J = 7.0$  Hz, 3H). <sup>19</sup>F NMR (376 MHz, CDCl<sub>3</sub>) δ -75.9 (s, 3F), -102.0 – -103.0 (m, 1F), -105.4 – -106.4 (m, 1F). <sup>13</sup>C NMR (101 MHz, CDCl<sub>3</sub>) δ 163.0 (t,  $J = 32.2$  Hz), 157.3 (q,  $J = 37.7$  Hz), 115.6 (q,  $J = 288.8$  Hz), 114.6 (t,  $J = 254.3$  Hz), 63.6, 47.3, 42.6 (t,  $J = 23.8$  Hz), 17.6, 13.8. MS (ESI):  $m/z$  404 (M+H)<sup>+</sup>. HRMS (ESI): Calculated for C<sub>9</sub>H<sub>12</sub>NF<sub>5</sub>O<sub>3</sub>I (M+H)<sup>+</sup>: 403.9777; Found: 403.9778.

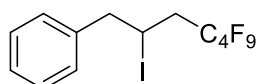

**(4,4,5,5,6,6,7,7,7-Nonafluoro-2-iodoheptyl)benzene (3l).** This compound is known.<sup>3</sup> The product (104 mg, 75% yield) was purified with silica gel chromatography (Petroleum ether (100%)) as colorless liquid. <sup>1</sup>H NMR (400 MHz, CDCl<sub>3</sub>) δ 7.40-7.28 (m, 3H), 7.22 (d,  $J = 6.8$  Hz, 2H), 4.48 (m, 1H), 3.35-3.15 (m, 2H), 2.90 (m, 2H). <sup>19</sup>F NMR (376 MHz, CDCl<sub>3</sub>) δ -81.1 (m, 3F), -113.2 (m, 2F), -124.6 (m, 2F), -126.0 (m, 2F). <sup>13</sup>C NMR (101 MHz, CDCl<sub>3</sub>) δ 138.5, 128.9, 128.6, 127.3, 120.0-104.0 (m), 46.9 (d,  $J = 1.8$  Hz), 40.6 (t,  $J = 21.0$  Hz), 19.4.

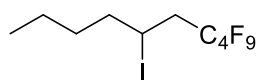

**1,1,1,2,2,3,3,4,4-Nonafluoro-6-iododecane (3m).** This compound is known.<sup>3</sup> The product (112 mg,

87% yield) was purified with silica gel chromatography (Petroleum ether (100%)) as colorless liquid.  $^1\text{H}$  NMR (400 MHz,  $\text{CDCl}_3$ )  $\delta$  4.39-4.29 (m, 1H), 3.00-2.70 (m, 2H), 1.90-1.72 (m, 2H), 1.60-1.20 (m, 4H), 0.93 (t,  $J = 7.2$  Hz, 3H).  $^{19}\text{F}$  NMR (376 MHz,  $\text{CDCl}_3$ )  $\delta$  -81.1 (t,  $J = 9.6$  Hz, 3F), -113.6 (m, 2F), -124.7 (m, 2F), -126.0 (m, 2F).  $^{13}\text{C}$  NMR (101 MHz,  $\text{CDCl}_3$ )  $\delta$  122.0-105.0 (m), 41.5 (t,  $J = 20.9$  Hz), 40.0 (d,  $J = 2.0$  Hz), 31.6, 21.6, 20.8, 13.8.

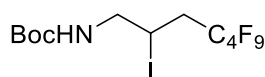

**Tert-butyl (4,4,5,5,6,6,7,7,7-nonafluoro-2-iodoheptyl)carbamate (3n).** This compound is known.<sup>4</sup> The product (92 mg, 61% yield) was purified with silica gel chromatography (Petroleum ether /Ethyl acetate = 15:1) as light yellow solid.  $^1\text{H}$  NMR (400 MHz,  $\text{CDCl}_3$ )  $\delta$  4.97 (br, 1H), 4.38 (m, 1H), 3.70-3.40 (m, 2H), 2.95-2.65 (m, 2H), 1.45 (s, 9H).  $^{19}\text{F}$  NMR (376 MHz,  $\text{CDCl}_3$ )  $\delta$  -81.2 (m, 3F), -113.6 (m, 2F), -124.6 (m, 2F), -125.9 (m, 2F).  $^{13}\text{C}$  NMR (101 MHz,  $\text{CDCl}_3$ )  $\delta$  155.6, 120.0-110.0 (m), 80.2, 48.9, 38.4 (t,  $J = 21.3$  Hz), 28.2, 18.7.

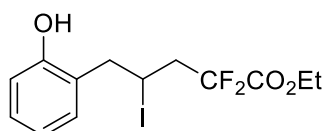

**Ethyl 2,2-difluoro-5-(2-hydroxyphenyl)-4-iodopentanoate (3o).** The product (98 mg, 85% yield) was purified with silica gel chromatography (Petroleum ether/Ethyl acetate = 10:1) as colorless liquid.  $^1\text{H}$  NMR (400 MHz,  $\text{CDCl}_3$ )  $\delta$  7.17 (td,  $J = 7.8$  Hz, 1.6 Hz, 1H), 7.11 (dd,  $J = 7.6$  Hz, 1.2 Hz, 1H), 6.90 (td,  $J = 7.4$  Hz, 0.8 Hz, 1H). 6.75 (dd,  $J = 8.0$  Hz, 0.8 Hz, 1H), 5.00 (s, 1H), 4.58-4.51 (m, 1H), 4.33 (q,  $J = 7.0$  Hz, 2H), 3.33-3.19 (m, 2H), 3.01-2.73 (m, 2H), 1.36 (t,  $J = 7.0$  Hz, 3H).  $^{19}\text{F}$  NMR (376 MHz,  $\text{CDCl}_3$ )  $\delta$  -101.0 – -102.0 (m, 1F), -105.5 – -106.6 (m, 1F).  $^{13}\text{C}$  NMR (101 MHz,  $\text{CDCl}_3$ )  $\delta$  163.7 (t,  $J = 32.4$  Hz), 153.6, 131.5, 128.6, 125.5, 120.8, 115.5, 115.2 (t,  $J = 253.4$  Hz), 63.3, 44.4 (t,  $J = 23.7$  Hz), 42.5, 20.9 (t,  $J = 4.2$  Hz), 13.8. MS (EI):  $m/z$  (%) 384 ( $\text{M}^+$ ), 257 (100), 119. HRMS (EI): Calculated for  $\text{C}_{13}\text{H}_{15}\text{F}_2\text{O}_3\text{I}$  ( $\text{M}^+$ ): 384.0034; Found: 384.0030.

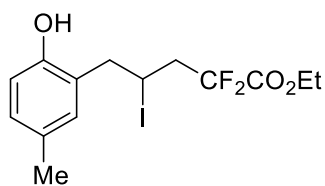

**Ethyl 2,2-difluoro-5-(2-hydroxy-5-methylphenyl)-4-iodopentanoate (3p).** The product (78 mg, 65% yield) was purified with silica gel chromatography (Petroleum ether/Ethyl acetate = 10:1) as colorless liquid.  $^1\text{H}$  NMR (400 MHz,  $\text{CDCl}_3$ )  $\delta$  6.95 (dd,  $J = 7.8$  Hz, 1.6 Hz, 1H), 6.90 (d,  $J = 1.6$  Hz, 1H), 6.64 (d,  $J = 7.8$  Hz, 1H), 4.81 (s, 1H), 4.56-4.48 (m, 1H), 4.33 (q,  $J = 7.0$  Hz, 2H), 3.28-3.17 (m, 2H), 2.99-2.72 (m, 2H), 2.27 (s, 3H), 1.36 (t,  $J = 7.2$  Hz, 3H).  $^{19}\text{F}$  NMR (376 MHz,  $\text{CDCl}_3$ )  $\delta$  -101.0 – -102.0 (m, 1F), -105.8 – -106.8 (m, 1F).  $^{13}\text{C}$  NMR (101 MHz,  $\text{CDCl}_3$ )  $\delta$  163.6 (t,  $J = 32.6$  Hz), 151.2, 131.9, 130.1, 128.9, 125.3, 115.4, 115.2 (t,  $J = 254.5$  Hz), 63.3, 44.3 (t,  $J = 23.7$  Hz), 42.5, 20.9 (t,  $J = 4.1$  Hz), 20.5, 13.8. MS (EI):  $m/z$  (%) 398 ( $\text{M}^+$ ), 271, 133 (100). HRMS (EI): Calculated for  $\text{C}_{14}\text{H}_{17}\text{F}_2\text{O}_3\text{I}$  ( $\text{M}^+$ ): 398.0191; Found: 398.0201.

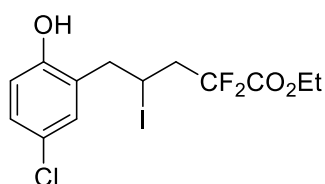

**Ethyl 5-(5-chloro-2-hydroxyphenyl)-2,2-difluoro-4-iodopentanoate (3q).** The product (72 mg, 57% yield) was purified with silica gel chromatography (Petroleum ether/Ethyl acetate = 10:1) as colorless liquid.  $^1\text{H}$  NMR (400 MHz,  $\text{CDCl}_3$ )  $\delta$  7.12 (dd,  $J = 8.6$  Hz, 2.4 Hz, 1H), 7.10 (d,  $J = 2.4$  Hz, 1H), 6.70 (d,  $J = 8.4$  Hz, 1H), 5.11 (s, 1H), 4.54-4.47 (m, 1H), 4.35 (q,  $J = 7.2$  Hz, 2H), 3.31-3.26 (m, 1H), 3.16-3.10 (m, 1H), 3.02-2.72 (m, 2H), 1.37 (t,  $J = 7.2$  Hz, 3H).  $^{19}\text{F}$  NMR (376 MHz,  $\text{CDCl}_3$ )  $\delta$  -101.0 – -102.0 (m, 1F), -106.0 – -107.0 (m, 1F).  $^{13}\text{C}$  NMR (101 MHz,  $\text{CDCl}_3$ )  $\delta$  163.6 (t,  $J = 32.4$  Hz), 152.2, 131.1, 128.3, 127.3, 125.4, 116.8, 115.1 (t,  $J = 253.7$  Hz), 63.4, 44.6 (t,  $J = 23.7$  Hz), 42.1, 20.0 (t,  $J = 4.0$  Hz), 13.9. MS (EI):  $m/z$  (%) 420 ( $\text{M}^+$ ), 418 ( $\text{M}^+$ ), 291, 153(100). HRMS (EI): Calculated for  $\text{C}_{13}\text{H}_{14}\text{F}_2\text{O}_3\text{ClI}$  ( $\text{M}^+$ ): 417.9644; Found: 417.9652.

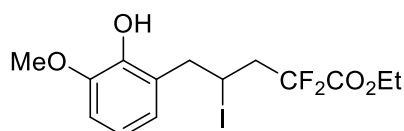

**Ethyl 2,2-difluoro-5-(2-hydroxy-3-methoxyphenyl)-4-iodopentanoate (3r).** The product (65 mg, 52% yield) was purified with silica gel chromatography (Petroleum ether/Ethyl acetate = 10:1) as colorless liquid.  $^1\text{H}$  NMR (400 MHz,  $\text{CDCl}_3$ )  $\delta$  6.81 (m, 2H), 6.73 (m, 1H), 5.75 (s, 1H), 4.60-4.50 (m, 1H), 4.33 (q,  $J = 7.0$  Hz, 2H), 3.89 (s, 3H), 3.33-3.23 (m, 2H), 3.00-2.70 (m, 2H), 1.36 (t,  $J = 7.0$  Hz, 3H).  $^{19}\text{F}$  NMR (376 MHz,  $\text{CDCl}_3$ )  $\delta$  -101.5 (dt,  $J = 264.3, 15.0$  Hz, 1F), 106.4 (dt,  $J = 262.8, 16.2$  Hz, 1F).  $^{13}\text{C}$  NMR (101 MHz,  $\text{CDCl}_3$ )  $\delta$  163.5 (t,  $J = 32.6$  Hz), 146.4, 143.7, 124.8, 123.0, 119.4, 115.2 (t,  $J = 253.2$  Hz), 109.5, 63.2, 55.9, 44.2 (t,  $J = 23.8$  Hz), 42.3, 20.4 (t,  $J = 4.3$  Hz), 13.8. MS (EI):  $m/z$  (%) 414 ( $\text{M}^+$ ), 287, 259. HRMS (EI): Calculated for  $\text{C}_{14}\text{H}_{17}\text{F}_2\text{O}_4\text{I}$  ( $\text{M}^+$ ): 414.0140; Found: 414.0132.

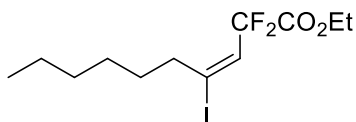

**Ethyl (*E*)-2,2-difluoro-4-iododec-3-enoate (5a).** This compound is known.<sup>5</sup> The product (93 mg, 86% yield,  $Z:E = 1:5.5$ ) was purified with silica gel chromatography (Petroleum ether/Ethyl acetate = 100:1) as colorless liquid.  $^1\text{H}$  NMR (400 MHz,  $\text{CDCl}_3$ )  $\delta$  6.40 (t,  $J = 13.2$  Hz, 1H), 4.33 (q,  $J = 7.2$  Hz, 2H), 2.59 (t,  $J = 7.2$  Hz, 2H), 1.60-1.48 (m, 2H), 1.35 (t,  $J = 7.2$  Hz, 3H), 1.33-1.25 (m, 6H), 0.89 (t,  $J = 6.8$  Hz, 3H).  $^{19}\text{F}$  NMR (376 MHz,  $\text{CDCl}_3$ )  $\delta$  -97.8 (d,  $J = 12.4$  Hz, 2F, *E*), -97.9 (d,  $J = 12.4$  Hz, 2F, *Z*).  $^{13}\text{C}$  NMR (101 MHz,  $\text{CDCl}_3$ )  $\delta$  163.2 (t,  $J = 34.4$  Hz), 131.2 (t,  $J = 27.2$  Hz), 119.6 (t,  $J = 7.7$  Hz), 111.5 (t,  $J = 253.6$  Hz), 63.3, 40.7, 31.5, 29.8, 28.0, 22.5, 14.0, 13.9.

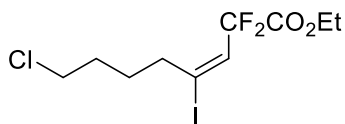

**Ethyl (*E*)-8-chloro-2,2-difluoro-4-iodooct-3-enoate (5b).** The product (75 mg, 68% yield,  $Z:E = 1:6.7$ ) was purified with silica gel chromatography (Petroleum ether/Ethyl acetate = 100:1) as colorless liquid.  $^1\text{H}$  NMR (400 MHz,  $\text{CDCl}_3$ )  $\delta$  6.44 (t,  $J = 13.2$  Hz, 1H), 4.34 (q,  $J = 7.2$  Hz, 2H), 3.55 (t,  $J = 6.4$  Hz, 2H), 2.65 (t,  $J = 7.0$  Hz, 2H), 1.82-1.67 (m, 4H), 1.36 (t,  $J = 7.2$  Hz, 3H).  $^{19}\text{F}$

NMR (376 MHz, CDCl<sub>3</sub>)  $\delta$  -97.8 (d,  $J$  = 13.5 Hz, 2F, *E*). <sup>13</sup>C NMR (101 MHz, CDCl<sub>3</sub>)  $\delta$  163.1 (t,  $J$  = 34.4 Hz), 131.9 (t,  $J$  = 27.2 Hz), 118.3 (t,  $J$  = 7.7 Hz), 111.5 (t,  $J$  = 253.8 Hz), 63.4, 44.4, 39.8, 31.0, 27.1, 13.9. MS (ESI):  $m/z$  369 (M<sup>+</sup>+H), 367 (M+H)<sup>+</sup>. HRMS (ESI): Calculated for C<sub>10</sub>H<sub>15</sub>F<sub>2</sub>O<sub>2</sub>ClI (M+H)<sup>+</sup>: 366.9768; Found: 366.9767.

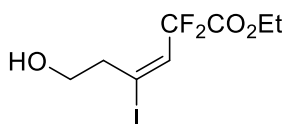

**Ethyl (*E*)-2,2-difluoro-6-hydroxy-4-iodohex-3-enoate (5c).** The product (67 mg, 70% yield, *Z*:*E* = 1:5.6) was purified with silica gel chromatography (Petroleum ether/Ethyl acetate = 5:1) as colorless liquid. <sup>1</sup>H NMR (400 MHz, CDCl<sub>3</sub>)  $\delta$  6.56 (t,  $J$  = 13.2 Hz, 1H), 4.34 (q,  $J$  = 7.2 Hz, 2H), 3.82 (t,  $J$  = 6.2 Hz, 2H), 2.92 (m, 2H), 1.59 (s, 1H), 1.36 (t,  $J$  = 7.2 Hz, 3H). <sup>19</sup>F NMR (376 MHz, CDCl<sub>3</sub>)  $\delta$  -97.6 (d,  $J$  = 12.4 Hz, 2F, *E*). <sup>13</sup>C NMR (101 MHz, CDCl<sub>3</sub>)  $\delta$  163.4 (t,  $J$  = 34.3 Hz), 133.8 (t,  $J$  = 27.5 Hz), 114.1 (t,  $J$  = 7.7 Hz), 111.5 (t,  $J$  = 254.0 Hz), 63.6, 61.6, 43.3, 13.9. MS (ESI):  $m/z$ , 321 (M+H)<sup>+</sup>. HRMS (ESI): Calculated for C<sub>8</sub>H<sub>12</sub>F<sub>2</sub>O<sub>3</sub>I (M+H)<sup>+</sup>: 320.9794; Found: 320.9794.

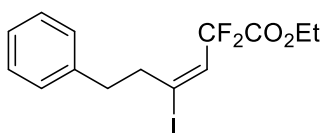

**Ethyl (*E*)-2,2-difluoro-4-iodo-6-phenylhex-3-enoate (5d).** The product (83 mg, 73% yield, *Z*:*E* = 1:6.0) was purified with silica gel chromatography (Petroleum ether/Ethyl acetate = 100:1) as colorless liquid. <sup>1</sup>H NMR (400 MHz, CDCl<sub>3</sub>)  $\delta$  7.35-7.10 (m, 5H), 6.43 (t,  $J$  = 13.2 Hz, 1H), 4.29 (q,  $J$  = 7.2 Hz, 2H), 3.00-2.80 (m, 4H), 1.32 (t,  $J$  = 7.2 Hz, 3H). <sup>19</sup>F NMR (376 MHz, CDCl<sub>3</sub>)  $\delta$  -98.1 (d,  $J$  = 13.5 Hz, 2F, *E*), -98.3 (d,  $J$  = 12.0 Hz, 2F, *Z*). <sup>13</sup>C NMR (101 MHz, CDCl<sub>3</sub>)  $\delta$  163.0 (t,  $J$  = 34.3 Hz), 139.7, 131.8 (t,  $J$  = 27.0 Hz), 128.6, 128.5, 126.4, 117.4 (t,  $J$  = 7.5 Hz), 111.5 (t,  $J$  = 253.6 Hz), 63.4, 43.0 (t,  $J$  = 1.9 Hz), 36.0, 13.9. MS (ESI):  $m/z$  398 (M+NH<sub>4</sub>)<sup>+</sup>, 381 (M+H)<sup>+</sup>. HRMS (ESI): Calculated for C<sub>14</sub>H<sub>19</sub>F<sub>2</sub>NO<sub>2</sub>I (M+NH<sub>4</sub>)<sup>+</sup>: 398.0423; Found: 398.0421.

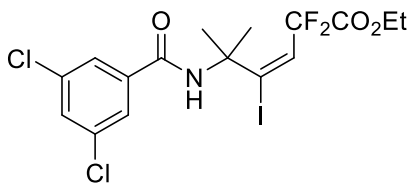

**Ethyl (E)-5-(3,5-dichlorobenzamido)-2,2-difluoro-4-iodo-5-methylhex-3-enoate (5e).** The product (105 mg, 69% yield, *Z:E* = 1:69) was purified with silica gel chromatography (Petroleum ether/Ethyl acetate = 20:1) as colorless liquid. <sup>1</sup>H NMR (400 MHz, CDCl<sub>3</sub>) δ 7.58-7.52 (m, 2H), 7.48-7.38 (m, 1H), 6.70-6.62 (m, 1H), 6.33 (br, 1H), 4.35 (q, *J* = 7.2 Hz, 2H), 1.69 (s, 6H), 1.36 (t, *J* = 7.2 Hz, 3H). <sup>19</sup>F NMR (376 MHz, CDCl<sub>3</sub>) δ -97.4 – -95.7 (m, 2F, *E*). <sup>13</sup>C NMR (101 MHz, CDCl<sub>3</sub>) δ 164.2, 162.4 (t, *J* = 34.1 Hz), 137.5, 135.1, 131.1, 128.3 (t, *J* = 30.4 Hz), 125.6, 112.4 (t, *J* = 248.9 Hz), 63.3, 59.9, 26.9, 13.8. MS (ESI): *m/z* 508 (M+H)<sup>+</sup>, 506 (M+H)<sup>+</sup>. HRMS (ESI): Calculated for C<sub>16</sub>H<sub>17</sub>F<sub>2</sub>Cl<sub>2</sub>NO<sub>3</sub>I (M+H)<sup>+</sup>: 505.9593; Found: 505.9591.

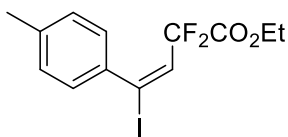

**Ethyl (E)-2,2-difluoro-4-iodo-4-(p-tolyl)but-3-enoate (5f).** This compound is known.<sup>6</sup> The product (96 mg, 87% yield, *Z:E* = 1:10) was purified with silica gel chromatography (Petroleum ether/Ethyl acetate = 100:1) as colorless liquid. <sup>1</sup>H NMR (400 MHz, CDCl<sub>3</sub>) δ 7.20 (d, *J* = 8.0 Hz, 2H), 7.12 (d, *J* = 8.0 Hz, 2H), 6.69 (t, *J* = 10.8 Hz, 1H), 3.97 (q, *J* = 7.2 Hz, 2H), 2.34 (s, 3H), 1.20 (t, *J* = 7.2 Hz, 3H). <sup>19</sup>F NMR (376 MHz, CDCl<sub>3</sub>) δ -93.6 (d, *J* = 10.9 Hz, 2F, *E*). <sup>13</sup>C NMR (101 MHz, CDCl<sub>3</sub>) δ 162.5 (t, *J* = 33.4 Hz), 139.6, 137.8, 132.6 (t, *J* = 28.6 Hz), 128.6, 127.8 (t, *J* = 1.8 Hz), 110.8 (t, *J* = 250.9 Hz), 109.2 (t, *J* = 10.2 Hz), 63.0, 21.3, 13.6.

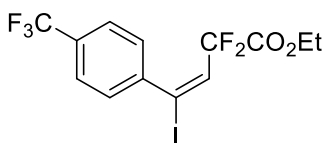

**Ethyl (E)-2,2-difluoro-4-iodo-4-(4-(trifluoromethyl)phenyl)but-3-enoate (5g).** This compound is known.<sup>7</sup> The product (115 mg, 91% yield, *Z:E* = 1:8.4) was purified with silica gel chromatography

(Petroleum ether/Ethyl acetate = 100:1) as colorless liquid.  $^1\text{H}$  NMR (400 MHz,  $\text{CDCl}_3$ )  $\delta$  7.59 (d,  $J = 8.0$  Hz, 2H), 7.41 (d,  $J = 8.0$  Hz, 2H), 6.76 (t,  $J = 11.2$  Hz, 1H), 4.09 (q,  $J = 7.0$  Hz, 2H), 1.24 (t,  $J = 7.0$  Hz, 3H).  $^{19}\text{F}$  NMR (376 MHz,  $\text{CDCl}_3$ )  $\delta$  -63.0 (s, 3F), -95.3 (d,  $J = 10.9$  Hz, 2F).  $^{13}\text{C}$  NMR (101 MHz,  $\text{CDCl}_3$ )  $\delta$  162.4 (t,  $J = 33.4$  Hz), 144.3, 133.8 (t,  $J = 27.4$  Hz), 131.2 (q,  $J = 33.0$  Hz), 128.0 (t,  $J = 2.0$  Hz), 125.1 (q,  $J = 3.8$  Hz), 123.6 (q,  $J = 273.4$  Hz), 110.8 (t,  $J = 253.0$  Hz), 105.9 (t,  $J = 8.9$  Hz), 63.4, 13.7.

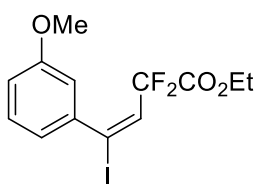

**Ethyl (*E*)-2,2-difluoro-4-iodo-4-(3-methoxyphenyl)but-3-enoate (5h).** This compound is known.<sup>7</sup> The product (103 mg, 90% yield,  $Z:E = 1:5.6$ ) was purified with silica gel chromatography (Petroleum ether/Ethyl acetate = 50:1) as colorless liquid.  $^1\text{H}$  NMR (400 MHz,  $\text{CDCl}_3$ )  $\delta$  7.22 (t,  $J = 7.8$  Hz, 1H), 6.89 (d,  $J = 7.6$  Hz, 1H), 6.86-6.80 (m, 2H), 6.70 (t,  $J = 11.0$  Hz, 1H), 3.98 (q,  $J = 7.2$  Hz, 2H), 3.80 (s, 3H), 1.20 (t,  $J = 7.2$  Hz, 3H).  $^{19}\text{F}$  NMR (376 MHz,  $\text{CDCl}_3$ )  $\delta$  -93.8 (d,  $J = 10.9$  Hz, 2F).  $^{13}\text{C}$  NMR (101 MHz,  $\text{CDCl}_3$ )  $\delta$  162.4 (t,  $J = 33.2$  Hz), 158.8, 141.7, 133.0 (t,  $J = 28.7$  Hz), 129.1, 120.2, 115.4, 113.1, 110.8 (t,  $J = 251.2$  Hz), 108.3 (t,  $J = 10.3$  Hz), 63.1, 55.3, 13.6.

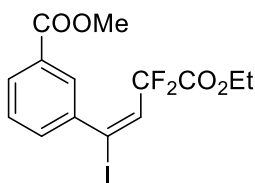

**Methyl (*E*)-3-(4-ethoxy-3,3-difluoro-1-iodo-4-oxobut-1-en-1-yl)benzoate (5i).** The product (107 mg, 87% yield,  $Z:E = 1:25$ ) was purified with silica gel chromatography (Petroleum ether/Ethyl acetate = 20:1) as pale yellow liquid.  $^1\text{H}$  NMR (400 MHz,  $\text{CDCl}_3$ )  $\delta$  7.97 (d,  $J = 7.2$  Hz, 1H), 7.95 (s, 1H), 7.48 (d,  $J = 7.2$  Hz, 1H), 7.40 (t,  $J = 7.8$  Hz, 1H), 6.74 (t,  $J = 11.4$  Hz, 1H), 4.07 (q,  $J = 7.2$  Hz, 2H), 3.92 (s, 3H), 1.23 (t,  $J = 7.2$  Hz, 3H).  $^{19}\text{F}$  NMR (376 MHz,  $\text{CDCl}_3$ )  $\delta$  -95.2 (d,  $J = 10.9$  Hz, 2F).  $^{13}\text{C}$  NMR (101 MHz,  $\text{CDCl}_3$ )  $\delta$  166.0, 162.4 (t,  $J = 33.5$  Hz), 141.1, 133.6 (t,  $J = 27.8$  Hz),



131.8, 130.2, 130.1, 128.6, 128.2, 110.8 (t,  $J = 252.2$  Hz), 106.7 (t,  $J = 8.9$  Hz), 63.3, 52.3, 13.6. MS (ESI):  $m/z$  411 (M+H)<sup>+</sup>. HRMS (ESI): Calculated for C<sub>14</sub>H<sub>14</sub>F<sub>2</sub>O<sub>4</sub>I (M+H)<sup>+</sup>: 410.9899; Found: 410.9900.

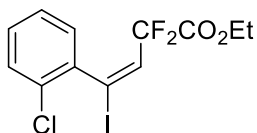

**Ethyl (*E*)-4-(2-chlorophenyl)-2,2-difluoro-4-iodobut-3-enoate (5j).** This compound is known.<sup>7</sup> The product (96 mg, 83% yield,  $Z:E=1:23$ ) was purified with silica gel chromatography (Petroleum ether/Ethyl acetate = 50:1) as pale yellow liquid. <sup>1</sup>H NMR (400 MHz, CDCl<sub>3</sub>)  $\delta$  7.38-7.34 (m, 1H), 7.29-7.21 (m, 3H), 6.77 (t,  $J = 11.2$  Hz, 1H), 4.16-4.09 (m, 2H), (m, 2H), 1.26 (t,  $J = 7.0$  Hz, 3H). <sup>19</sup>F NMR (376 MHz, CDCl<sub>3</sub>)  $\delta$  -98.0 (m, 2F). <sup>13</sup>C NMR (101 MHz, CDCl<sub>3</sub>)  $\delta$  162.2 (t,  $J = 33.6$  Hz), 138.8, 134.6 (t,  $J = 27.6$  Hz), 131.4, 130.4, 129.7, 128.8, 126.5, 110.8 (t,  $J = 253.1$  Hz), 103.3 (t,  $J = 9.2$  Hz), 63.3, 13.7.

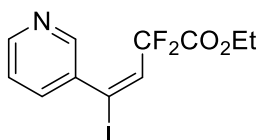

**Ethyl (*E*)-2,2-difluoro-4-iodo-4-(pyridin-3-yl)but-3-enoate (5k).** This compound is known.<sup>6</sup> The product (84 mg, 79% yield,  $Z:E=1:13$ ) was purified with silica gel chromatography (Petroleum ether/Ethyl acetate = 20:1) as pale yellow liquid. <sup>1</sup>H NMR (400 MHz, CDCl<sub>3</sub>)  $\delta$  8.54 (d,  $J = 2.0$  Hz, 1H), 8.51 (dd,  $J = 4.5$  Hz, 1.4 Hz, 1H), 7.61 (dt,  $J = 8.4$  Hz, 2.0 Hz, 1H), 7.25 (dd,  $J = 8.0$  Hz, 4.8 Hz, 1H), 6.79 (t,  $J = 11.6$  Hz, 1H), 4.11 (q,  $J = 7.2$  Hz, 2H), 1.24 (t,  $J = 7.2$  Hz, 3H). <sup>19</sup>F NMR (376 MHz, CDCl<sub>3</sub>)  $\delta$  -95.4 (d,  $J = 12.0$  Hz, 2F). <sup>13</sup>C NMR (101 MHz, CDCl<sub>3</sub>)  $\delta$  162.4 (t,  $J = 33.3$  Hz), 149.9, 147.8, 137.1, 135.1, 134.4 (t,  $J = 27.3$  Hz), 122.7, 110.8 (t,  $J = 253.3$  Hz), 103.7 (t,  $J = 8.8$  Hz), 63.5, 13.7. MS (ESI):  $m/z$  354 (M+H)<sup>+</sup>. HRMS (ESI): Calculated for C<sub>11</sub>H<sub>11</sub>F<sub>2</sub>NO<sub>2</sub>I (M+H)<sup>+</sup>: 353.9797; Found: 353.9796.

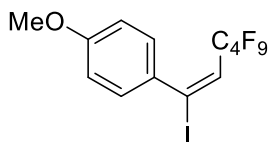

**(E)-1-Methoxy-4-(3,3,4,4,5,5,6,6,6-nonafluoro-1-iodohex-1-en-1-yl)benzene (5l).** The product (129 mg, 90% yield) was purified with silica gel chromatography (Petroleum ether/Ethyl acetate = 150:1) as colorless liquid.  $^1\text{H}$  NMR (400 MHz,  $\text{CDCl}_3$ )  $\delta$  7.26 (d,  $J = 8.8$  Hz, 1H), 6.83 (d,  $J = 8.8$  Hz, 1H), 6.54 (t,  $J = 13.6$  Hz, 2H), 3.80 (s, 3H).  $^{19}\text{F}$  NMR (376 MHz,  $\text{CDCl}_3$ )  $\delta$  -81.1 (m, 3F), -105.2 (m, 2F), -123.9 (m, 2F), -125.9 (m, 2F).  $^{13}\text{C}$  NMR (101 MHz,  $\text{CDCl}_3$ )  $\delta$  160.2, 133.5, 128.8 (t,  $J = 2.4$  Hz), 126.2 (t,  $J = 21.9$  Hz), 120.0-105.0 (m), 113.3, 55.2. MS (EI):  $m/z$  (%) 478 ( $\text{M}^+$ ), 351(100), 132. HRMS (EI): Calculated for  $\text{C}_{13}\text{H}_8\text{F}_9\text{OI}$  ( $\text{M}^+$ ): 477.9476; Found: 477.9474.

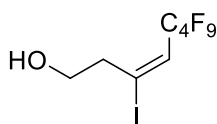

**(E)-5,5,6,6,7,7,8,8,8-Nonafluoro-3-iodooct-3-en-1-ol (5m).** This compound is known.<sup>4</sup> The product (77 mg, 62% yield) was purified with silica gel chromatography (Petroleum ether/Ethyl acetate = 10:1) as pale yellow liquid.  $^1\text{H}$  NMR (400 MHz,  $\text{CDCl}_3$ )  $\delta$  6.48 (d,  $J = 14.2$  Hz, 1H), 3.86 (t,  $J = 6.4$  Hz, 2H), 2.93 (t,  $J = 6.0$  Hz, 2H), 1.57 (br, 1H).  $^{19}\text{F}$  NMR (376 MHz,  $\text{CDCl}_3$ )  $\delta$  -81.0 (m, 3F), -105.3 (m, 2F), -124.1 (m, 2F), -125.9 (m, 2F).  $^{13}\text{C}$  NMR (101 MHz,  $\text{CDCl}_3$ )  $\delta$  128.9 (t,  $J = 23.9$  Hz), 117.2 (t,  $J = 5.6$  Hz), 120.0-105.0 (m), 61.8, 43.6.

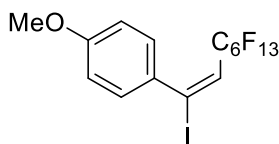

**(E)-1-Methyl-4-(3,3,4,4,5,5,6,6,7,7,8,8,8-tridecafluoro-1-iodooct-1-en-1-yl)benzene (5n).** The product (121.4 mg, 70% yield) was purified with silica gel chromatography (Petroleum ether/Ethyl acetate = 150:1) as colorless oil.  $^1\text{H}$  NMR (400 MHz,  $\text{CDCl}_3$ )  $\delta$  7.25 (d,  $J = 8.6$  Hz, 2H), 6.83 (d,  $J = 8.6$  Hz, 2H), 6.53 (t,  $J = 13.4$  Hz, 1H), 3.80 (s, 3H).  $^{19}\text{F}$  NMR (376 MHz,  $\text{CDCl}_3$ )  $\delta$  -80.8 (m, 3F), -104.9 (m, 2F), -121.8 (m, 2F), -122.9 (m, 4F), -126.2 (m, 2F).  $^{13}\text{C}$  NMR (101 MHz,  $\text{CDCl}_3$ )  $\delta$

160.2, 133.6, 128.8 (t,  $J = 2.4$  Hz), 126.2 (t,  $J = 21.9$  Hz), 120.0-105.0 (m), 113.3, 55.3. MS (EI):  $m/z$  (%) 578 ( $M^+$ ), 451 (100), 132. HRMS (EI): Calculated for  $C_{15}H_8F_{13}OI$  ( $M^+$ ): 577.9412; Found: 577.9405.

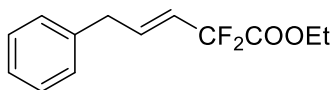

**Ethyl (*E*)-2,2-difluoro-5-phenylpent-3-enoate (6a).** This compound is known.<sup>8</sup> The product (50 mg, 70% yield,  $Z:E = 1:12$ ) was purified with silica gel chromatography (Petroleum ether/Ethyl acetate = 100:1) as colorless liquid.  $^1H$  NMR (400 MHz,  $CDCl_3$ )  $\delta$  7.31 (t,  $J = 7.2$  Hz, 2H), 7.23 (m, 1H), 7.15 (d,  $J = 7.2$  Hz, 2H). 6.43 (m, 1H), 5.69 (dd,  $J = 26.0$  Hz, 11.8 Hz, 1H), 4.30 (q,  $J = 6.8$  Hz, 2H), 3.47 (s, 2H), 1.32 (t,  $J = 6.8$  Hz, 3H).  $^{19}F$  NMR (376 MHz,  $CDCl_3$ )  $\delta$  -103.2 (s, 2F).  $^{13}C$  NMR (101 MHz,  $CDCl_3$ )  $\delta$  163.9 (t,  $J = 34.8$  Hz), 138.3 (t,  $J = 9.0$  Hz), 137.7, 128.6, 126.6, 126.3, 122.2 (t,  $J = 25.2$  Hz), 112.2 (t,  $J = 249.1$  Hz), 62.9, 38.0, 13.9.

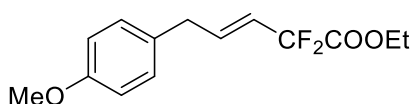

**Ethyl (*E*)-2,2-difluoro-5-(4-methoxyphenyl)pent-3-enoate (6b).** The product (61 mg, 75% yield,  $Z:E = 1:14$ ) was purified with silica gel chromatography (Petroleum ether/Ethyl acetate = 200:1) as colorless liquid.  $^1H$  NMR (400 MHz,  $CDCl_3$ )  $\delta$  7.08 (d,  $J = 8.8$  Hz, 2H), 6.86 (d,  $J = 8.8$  Hz, 2H). 6.46-6.35 (m, 1H), 5.75-5.60 (m, 1H), 4.32 (q,  $J = 7.2$  Hz, 2H), 3.80 (s, 3H), 3.45-3.38 (m, 2H), 1.34 (t,  $J = 7.2$  Hz, 3H).  $^{19}F$  NMR (376 MHz,  $CDCl_3$ )  $\delta$  -103.1 (d,  $J = 9.4$  Hz, 2F).  $^{13}C$  NMR (101 MHz,  $CDCl_3$ )  $\delta$  164.0 (t,  $J = 34.8$  Hz), 158.3, 138.8 (t,  $J = 9.0$  Hz), 129.6, 127.6, 121.8 (t,  $J = 25.2$  Hz), 114.0, 112.3 (t,  $J = 248.9$  Hz), 62.9, 55.2, 37.2, 13.9. MS (EI):  $m/z$  (%) 270 ( $M^+$ ), 177, 147(100). HRMS (EI): Calculated for  $C_{14}H_{16}F_2O_3$  ( $M^+$ ): 270.1068; Found: 270.1057.

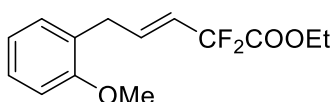

**Ethyl (*E*)-2,2-difluoro-5-(2-methoxyphenyl)pent-3-enoate (6c).** The product (60 mg, 74% yield, *Z*:*E* = 1:10) was purified with silica gel chromatography (Petroleum ether/Ethyl acetate = 200:1) as colorless liquid. <sup>1</sup>H NMR (400 MHz, CDCl<sub>3</sub>) δ 7.22 (t, *J* = 7.6 Hz, 1H), 7.08 (d, *J* = 7.2 Hz, 1H), 6.89 (t, *J* = 7.2 Hz, 1H), 6.86 (d, *J* = 8.8 Hz, 1H), 6.50-6.35 (m, 1H), 5.75-5.60 (m, 1H), 4.30 (q, *J* = 7.2 Hz, 2H), 3.80 (s, 3H), 3.45 (m, 1H), 1.31 (t, *J* = 7.0 Hz, 3H). <sup>19</sup>F NMR (376 MHz, CDCl<sub>3</sub>) δ -103.1 (d, *J* = 10.9 Hz, 2F). <sup>13</sup>C NMR (101 MHz, CDCl<sub>3</sub>) δ 164.1 (t, *J* = 34.6 Hz), 157.2, 138.0 (t, *J* = 9.0 Hz), 129.9, 128.0, 126.3, 121.5 (t, *J* = 5.0 Hz), 120.5, 112.4 (t, *J* = 246.2 Hz), 110.3, 62.8, 55.2, 32.7, 13.9. MS (EI): *m/z* (%) 270 (M<sup>+</sup>), 177, 147(100). HRMS (EI): Calculated for C<sub>14</sub>H<sub>16</sub>F<sub>2</sub>O<sub>3</sub> (M<sup>+</sup>): 270.1068; Found: 270.1078.

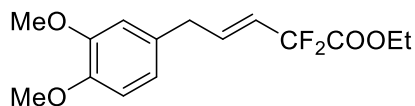

**Ethyl (*E*)-5-(3,4-dimethoxyphenyl)-2,2-difluoropent-3-enoate (6d).** The product (64 mg, 71% yield, *Z*:*E* = 1:14) was purified with silica gel chromatography (Petroleum ether/Ethyl acetate = 200:1) as colorless liquid. <sup>1</sup>H NMR (400 MHz, CDCl<sub>3</sub>) δ 6.81 (d, *J* = 8.2 Hz, 1H), 6.70 (dd, *J* = 8.2 Hz, 1.8 Hz, 1H), 6.66 (d, *J* = 1.8 Hz, 1H), 6.50-6.35 (m, 1H), 5.75-5.60 (m, 1H), 4.32 (q, *J* = 7.2 Hz, 2H), 3.87 (s, 6H), 3.46-3.38 (m, 2H), 1.33 (t, *J* = 7.2 Hz, 3H). <sup>19</sup>F NMR (376 MHz, CDCl<sub>3</sub>) δ -103.1 (dd, *J* = 10.9 Hz, 3.1 Hz, 2F). <sup>13</sup>C NMR (101 MHz, CDCl<sub>3</sub>) δ 164.0 (t, *J* = 34.6 Hz), 148.9, 147.7, 138.6 (t, *J* = 8.9 Hz), 130.1, 122.0 (t, *J* = 25.2 Hz), 120.6, 112.2 (t, *J* = 249.1 Hz), 111.8, 111.2, 63.0, 55.9, 55.8, 37.6, 13.9. MS (EI): *m/z* (%) 300 (M<sup>+</sup>), 177 (100). HRMS (EI): Calculated for C<sub>15</sub>H<sub>18</sub>F<sub>2</sub>O<sub>4</sub> (M<sup>+</sup>): 300.1173; Found: 300.1182.

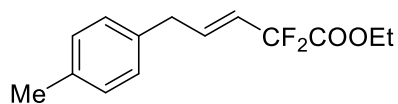

**Ethyl (*E*)-2,2-difluoro-5-(*p*-tolyl)pent-3-enoate (6e).** The product (55mg, 72% yield, *Z*:*E* = 1:12) was purified with silica gel chromatography (Petroleum ether/Ethyl acetate = 200:1) as a colorless liquid. <sup>1</sup>H NMR (400 MHz, CDCl<sub>3</sub>) δ 7.13 (d, *J* = 8.2 Hz, 2H), 7.05 (d, *J* = 8.2 Hz, 2H), 6.50-6.35 (m, 1H), 5.75-5.60 (m, 1H), 4.32 (q, *J* = 7.2 Hz, 2H), 3.44 (m, 2H), 2.34 (s, 3H), 1.34 (t, *J* = 7.2 Hz, 3H). <sup>19</sup>F NMR (376 MHz, CDCl<sub>3</sub>) δ -103.1 (d, *J* = 10.9 Hz, 2F). <sup>13</sup>C NMR (101 MHz, CDCl<sub>3</sub>) δ

164.0 (t,  $J = 34.8$  Hz), 138.6 (t,  $J = 9.0$  Hz), 136.2, 134.6, 129.3, 128.5, 122.0 (t,  $J = 25.2$  Hz), 112.3 (t,  $J = 248.8$  Hz), 62.9, 37.6, 21.0, 13.9. MS (EI):  $m/z$  (%) 254 ( $M^+$ ), 187, 161 (100). HRMS (EI): Calculated for  $C_{14}H_{16}F_2O_2$  ( $M^+$ ): 254.1118; Found: 254.1121.

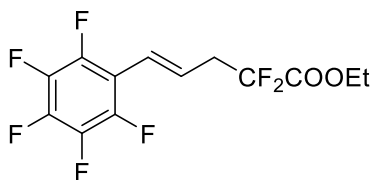

**Ethyl (*E*)-2,2-difluoro-5-(perfluorophenyl)pent-4-enoate (6f).** The product (35mg, 35% yield) was purified with silica gel chromatography (Petroleum ether/Ethyl acetate = 200:1) as colorless liquid.  $^1H$  NMR (400 MHz,  $CDCl_3$ )  $\delta$  6.55-6.40 (m, 2H), 4.34 (q,  $J = 7.2$  Hz, 2H). 3.05 (td,  $J = 15.6$  Hz, 5.6 Hz, 2H), 1.35 (t,  $J = 7.0$  Hz, 3H).  $^{19}F$  NMR (376 MHz,  $CDCl_3$ )  $\delta$  -105.1 (t,  $J = 15.6$  Hz, 2F), -142.9 (dd,  $J = 21.8$  Hz, 7.9 Hz, 2F), -155.4 (t,  $J = 21.0$  Hz, 1F), -162.7 (m, 2F).  $^{13}C$  NMR (101 MHz,  $CDCl_3$ )  $\delta$  163.5 (t,  $J = 32.5$  Hz), 144.7 (dm,  $J = 245.0$  Hz), 140.1 (td,  $J = 21.4$ , 7.5 Hz, 2F), 137.6 (dm,  $J = 254.7$  Hz), 128.1 (m), 120.7, 114.7 (t,  $J = 253.3$  Hz), 111.1, 63.1, 39.4 (t,  $J = 24.4$  Hz), 13.9. MS (EI):  $m/z$  (%) 330 ( $M^+$ ), 310, 282 (100). HRMS (EI): Calculated for  $C_{13}H_9F_7O_2$  ( $M^+$ ): 330.0491; Found: 330.0495.

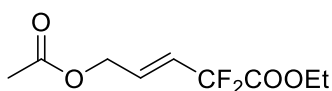

**Ethyl (*E*)-5-acetoxy-2,2-difluoropent-3-enoate (6g).** The product (34 mg, 51% yield) was purified with silica gel chromatography (Petroleum ether/Ethyl acetate = 18:1) as colorless liquid.  $^1H$  NMR (400 MHz,  $CDCl_3$ )  $\delta$  6.33 (d,  $J = 16.0$  Hz, 1H), 5.94 (dd,  $J = 26.4$ , 11.6 Hz, 1H), 4.67 (br, 2H). 4.32 (q,  $J = 7.0$  Hz, 2H), 2.10 (s, 3H), 1.34 (t,  $J = 7.0$  Hz, 3H).  $^{19}F$  NMR (376 MHz,  $CDCl_3$ )  $\delta$  -104.5 (d,  $J = 10.9$  Hz, 2F).  $^{13}C$  NMR (101 MHz,  $CDCl_3$ )  $\delta$  170.2, 163.5, 132.8 (t,  $J = 9.1$  Hz), 122.6 (t,  $J = 25.6$  Hz), 111.8 (t,  $J = 249.7$  Hz), 63.1, 62.3, 20.7, 13.9. MS (EI):  $m/z$  (%) 222 ( $M^+$ ), 160, 149, 90 (100). HRMS (EI): Calculated for  $C_9H_{12}F_2O_4$  ( $M^+$ ): 222.0704; Found: 222.0710.

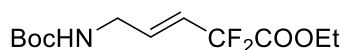

**Ethyl (*E*)-5-((*tert*-butoxycarbonyl)amino)-2,2-difluoropent-3-enoate (6h).** The product (54 mg, 64% yield, *Z*:*E* = 1:20) was purified with silica gel chromatography (Petroleum ether/Ethyl acetate = 12:1) as colorless liquid. <sup>1</sup>H NMR (400 MHz, CDCl<sub>3</sub>) δ 6.26 (d, *J* = 15.6 Hz, 1H), 5.80 (q, *J* = 12.8 Hz, 1H), 4.78 (br, 1H), 4.29 (q, *J* = 7.2 Hz, 2H), 3.85 (s, 2H), 1.42 (s, 9H), 1.32 (t, *J* = 7.2 Hz, 3H). <sup>19</sup>F NMR (376 MHz, CDCl<sub>3</sub>) δ -103.6 (d, *J* = 10.2 Hz, 2F). <sup>13</sup>C NMR (101 MHz, CDCl<sub>3</sub>) δ 163.7 (t, *J* = 34.6 Hz), 155.5, 136.1 (t, *J* = 8.7 Hz), 121.4 (t, *J* = 25.4 Hz), 112.1 (t, *J* = 249.3 Hz), 79.8, 63.0, 41.0, 28.2, 13.8. MS (EI): *m/z* (%) 279 (M<sup>+</sup>), 264, 223. HRMS (EI): Calculated for C<sub>12</sub>H<sub>19</sub>NF<sub>2</sub>O<sub>4</sub> (M<sup>+</sup>): 279.1282; Found: 279.1277.

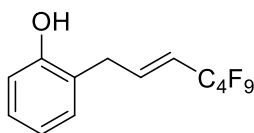

**(*E*)-2-(4,4,5,5,6,6,7,7,7-Nonafluorohept-2-en-1-yl)phenol (6i).** The product (99 mg, 94% yield) was purified with silica gel chromatography (Petroleum ether/Ethyl acetate = 10:1) as colorless liquid. <sup>1</sup>H NMR (400 MHz, CDCl<sub>3</sub>) δ 7.16 (t, *J* = 7.6 Hz, 1H), 7.11 (d, *J* = 7.6 Hz, 1H), 6.93 (t, *J* = 7.4 Hz, 1H), 6.78 (d, *J* = 8.0 Hz, 1H), 6.68-6.56 (m, 1H), 5.62 (dd, *J* = 27.2 Hz, 12.8 Hz, 1H), 5.00 (s, 1H), 3.55 (m, 2H). <sup>19</sup>F NMR (376 MHz, CDCl<sub>3</sub>) δ -80.1 (t, *J* = 8.8 Hz, 3F), -110.5 (m, 2F), -123.4 (t, *J* = 13.3 Hz, 2F), -124.8 (t, *J* = 10.2 Hz, 2F). <sup>13</sup>C NMR (101 MHz, CDCl<sub>3</sub>) δ 153.4, 141.0 (t, *J* = 9.0 Hz), 130.6, 128.3, 123.8, 121.2, 121.0-105.0 (m), 117.6 (t, *J* = 23.1 Hz), 115.4, 32.6. MS (EI): *m/z* (%) 352 (M<sup>+</sup>), 133 (100). HRMS (EI): Calculated for C<sub>13</sub>H<sub>9</sub>F<sub>9</sub>O (M<sup>+</sup>): 352.0510; Found: 352.0504.

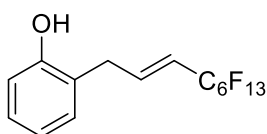

**(*E*)-2-(4,4,5,5,6,6,7,7,8,8,9,9,9-Tridecafluoronon-2-en-1-yl)phenol (6j).** The product (99 mg, 73% yield) was purified with silica gel chromatography (Petroleum ether/Ethyl acetate = 10:1) as

colorless liquid.  $^1\text{H}$  NMR (400 MHz,  $\text{CDCl}_3$ )  $\delta$  7.16 (td,  $J = 8.0$  Hz, 1.2 Hz, 1H), 7.09 (d,  $J = 7.2$  Hz, 1H), 6.92 (td,  $J = 7.2$  Hz, 1.2 Hz, 1H). 6.77 (d,  $J = 8.0$  Hz, 1H), 6.65-6.55 (m, 1H), 5.60 (dd,  $J = 28.0$  Hz, 12.8 Hz, 1H), 4.74 (s, 1H), 3.54 (m, 2H).  $^{19}\text{F}$  NMR (376 MHz,  $\text{CDCl}_3$ )  $\delta$  -80.1 (t,  $J = 9.4$  Hz, 3F), -118.6 (m, 2F), -129.0 (m, 2F), -130.2 (m, 2F), -130.7 (m, 2F), 133.5 (m, 2F).  $^{13}\text{C}$  NMR (101 MHz,  $\text{CDCl}_3$ )  $\delta$  153.4, 140.9 (t,  $J = 9.0$  Hz), 130.6, 128.3, 123.8, 121.2, 121.0-105.0 (m), 117.7 (t,  $J = 23.1$  Hz), 115.4, 32.6. MS (EI):  $m/z$  (%) 452 ( $\text{M}^+$ ), 133 (100), 105. HRMS (EI): Calculated for  $\text{C}_{15}\text{H}_9\text{F}_{13}\text{O}$  ( $\text{M}^+$ ): 452.0446; Found: 452.0445.

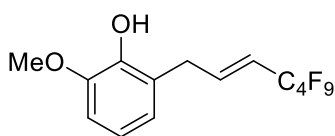

**(E)-2-Methoxy-6-(4,4,5,5,6,6,7,7,7-nonafluorohept-2-en-1-yl)phenol (6k).** The product (100 mg, 87% yield) was purified with silica gel chromatography (Petroleum ether/Ethyl acetate = 10:1) as colorless liquid.  $^1\text{H}$  NMR (400 MHz,  $\text{CDCl}_3$ )  $\delta$  6.82 (q,  $J = 7.9$  Hz, 1H), 6.81 (s, 1H), 6.71 (d,  $J = 7.2$  Hz, 1H), 6.65-6.55 (m, 1H), 5.75 (s, 1H), 5.62 (dd,  $J = 28.0$  Hz, 12.8 Hz, 1H), 3.90 (s, 3H), 3.55 (m, 2H).  $^{19}\text{F}$  NMR (376 MHz,  $\text{CDCl}_3$ )  $\delta$  -81.2 (t,  $J = 9.6$  Hz, 3F), -111.6 (m, 2F), -124.4 (m, 2F), -125.9 (m, 2F).  $^{13}\text{C}$  NMR (101 MHz,  $\text{CDCl}_3$ )  $\delta$  146.5, 143.6, 141.1 (t,  $J = 9.0$  Hz), 123.1, 122.2, 122.0-105.0 (m), 119.7, 117.4 (t,  $J = 23.1$  Hz), 109.3, 55.9, 32.2. MS (EI):  $m/z$  (%) 382 (100) ( $\text{M}^+$ ), 161, 131. HRMS: Calculated for  $\text{C}_{14}\text{H}_{11}\text{F}_9\text{O}_2$  ( $\text{M}^+$ ): 382.0615; Found: 382.0617.

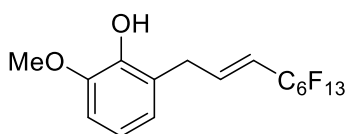

**(E)-2-Methoxy-6-(4,4,5,5,6,6,7,7,8,8,9,9,9-tridecafluoronon-2-en-1-yl)phenol (6l).** The product (127 mg, 88% yield) was purified with silica gel chromatography (Petroleum ether/Ethyl acetate = 12:1) as white solid.  $^1\text{H}$  NMR (400 MHz,  $\text{CDCl}_3$ )  $\delta$  6.85-6.75 (m, 2H), 6.71 (d,  $J = 7.2$  Hz, 1H), 6.65-6.63 (m, 1H), 5.74 (s, 1H), 5.62 (dd,  $J = 26.8$  Hz, 12.8 Hz, 1H), 3.90 (s, 3H), 3.55 (m, 2H).  $^{19}\text{F}$  NMR (376 MHz,  $\text{CDCl}_3$ )  $\delta$  -80.9 (m, 3F), -111.4 (m, 2F), -121.8 (m, 2F), -123.0 (m, 2F), -123.5 (m, 2F), 126.3 (m, 2F).  $^{13}\text{C}$  NMR (101 MHz,  $\text{CDCl}_3$ )  $\delta$  146.5, 143.6, 141.0 (t,  $J = 9.1$  Hz), 123.1, 122.1,

119.7, 120.0-105.0 (m), 117.5 (t,  $J = 23.4$  Hz), 109.3, 56.0, 32.2. MS (EI):  $m/z$  (%) 482 ( $M^+$ ), 163, 131(100). HRMS (EI): Calculated for  $C_{16}H_{11}F_{13}O_2$  ( $M^+$ ): 482.0551; Found: 482.0544.

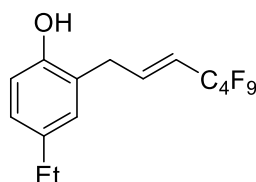

**(E)-4-Ethyl-2-(4,4,5,5,6,6,7,7,7-nonafluorohept-2-en-1-yl)phenol (6m).** The product (84 mg, 74% yield) was purified with silica gel chromatography (Petroleum ether/Ethyl acetate = 12:1) as a colorless liquid.  $^1H$  NMR (400 MHz,  $CDCl_3$ )  $\delta$  6.98 (dd,  $J = 8.2$  Hz, 1.8 Hz, 1H), 6.93 (s, 1H), 6.70 (d,  $J = 8.4$  Hz, 1H), 6.65-6.55 (m, 1H), 5.62 (dd,  $J = 27.6$  Hz, 12.6 Hz, 1H), 4.79 (s, 1H), 3.52 (m, 2H), 2.58 (q,  $J = 7.6$  Hz, 2H), 1.22 (t,  $J = 7.6$  Hz, 3H).  $^{19}F$  NMR (376 MHz,  $CDCl_3$ )  $\delta$  -81.2 (m, 3F), -111.6 (m, 2F), -124.4 (m, 2F), -125.8 (t,  $J = 10.9$  Hz, 2F).  $^{13}C$  NMR (101 MHz,  $CDCl_3$ )  $\delta$  151.3, 141.2 (t,  $J = 9.0$  Hz), 137.0, 129.9, 127.4, 123.5, 121.0-105.0 (m), 117.5 (t,  $J = 23.1$  Hz), 115.3, 32.7, 27.9, 15.7. MS (EI):  $m/z$  (%) 380 ( $M^+$ ), 365 (100). HRMS(EI): Calculated for  $C_{15}H_{13}F_9O$  ( $M^+$ ): 380.0823; Found: 380.0830.

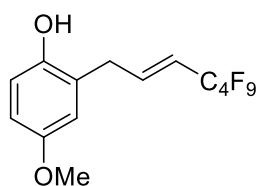

**(E)-4-Methoxy-2-(4,4,5,5,6,6,7,7,7-nonafluorohept-2-en-1-yl)phenol (6n).** The product (95 mg, 83% yield) was purified with silica gel chromatography (Petroleum ether/Ethyl acetate = 10:1) as white solid.  $^1H$  NMR (400 MHz,  $CDCl_3$ )  $\delta$  6.70 (m, 2H), 6.66 (s, 1H), 6.59 (m, 1H), 5.62 (dd,  $J = 27.2$  Hz, 12.4 Hz, 1H), 4.76 (s, 1H), 3.76 (s, 3H), 3.50 (m, 2H).  $^{19}F$  NMR (376 MHz,  $CDCl_3$ )  $\delta$  -81.2 (m, 3F), -111.6 (m, 2F), -124.4 (m, 2F), -125.9 (m, 2F).  $^{13}C$  NMR (101 MHz,  $CDCl_3$ )  $\delta$  153.8, 147.4, 140.8 (t,  $J = 9.1$  Hz), 124.9, 122.0-105.0 (m), 117.7 (t,  $J = 23.1$  Hz), 116.1, 116.0, 113.1, 55.7, 32.8. MS (EI):  $m/z$  (%) 382 (100) ( $M^+$ ), 367, 362. HRMS(EI): Calculated for  $C_{14}H_{11}F_9O_2$  ( $M^+$ ): 382.0615; Found: 382.0621.



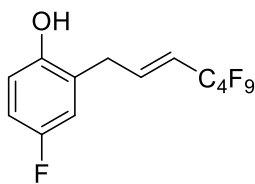

**(E)-4-Fluoro-2-(4,4,5,5,6,6,7,7,7-nonafluorohept-2-en-1-yl)phenol (6o).** The product (83 mg, 75% yield) was purified with silica gel chromatography (Petroleum ether/Ethyl acetate = 12:1) as colorless liquid.  $^1\text{H}$  NMR (400 MHz,  $\text{CDCl}_3$ )  $\delta$  6.90-6.75 (m, 2H), 6.75-6.65 (m, 1H), 6.62-6.50 (m, 1H), 5.62 (dd,  $J = 27.2$  Hz, 12.6 Hz, 1H), 4.87 (br, 1H), 3.50 (m, 2H).  $^{19}\text{F}$  NMR (376 MHz,  $\text{CDCl}_3$ )  $\delta$  -81.2 (m, 3F), -111.7 (m, 2F), -123.6 (m, 1F), -124.4 (m, 2F), -125.9 (m, 2F).  $^{13}\text{C}$  NMR (101 MHz,  $\text{CDCl}_3$ )  $\delta$  157.1 (d,  $J = 239.8$  Hz), 149.5 (d,  $J = 2.2$  Hz), 140.2 (t,  $J = 9.0$  Hz), 125.4 (d,  $J = 7.4$  Hz), 120.0-105.0 (m), 118.1 (t,  $J = 23.2$  Hz), 116.8 (d,  $J = 23.3$  Hz), 116.1 (d,  $J = 8.3$  Hz), 114.4 (d,  $J = 23.1$  Hz), 32.6. MS (EI):  $m/z$  (%) 370 ( $\text{M}^+$ ), 151 (100). HRMS (EI): Calculated for  $\text{C}_{13}\text{H}_8\text{F}_{10}\text{O}$  ( $\text{M}^+$ ): 370.0415; Found: 370.0410.

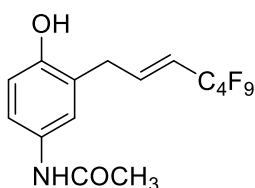

**(E)-N-(4-Hydroxy-3-(4,4,5,5,6,6,7,7,7-nonafluorohept-2-en-1-yl)phenyl)acetamide (6p).** The product (110 mg, 90% yield) was purified with silica gel chromatography (Petroleum ether/Ethyl acetate = 2:1) as white solid.  $^1\text{H}$  NMR (400 MHz,  $d^6$ -Acetone)  $\delta$  8.96 (br, 1H), 8.42 (s, 1H), 7.38 (s, 1H), 7.37 (m, 1H), 6.80 (d,  $J = 8.4$  Hz, 1H), 6.75-6.63 (m, 1H), 5.81 (dd,  $J = 28.0$  Hz, 13.2 Hz, 1H), 3.55 (m, 2H), 2.02 (s, 3H).  $^{19}\text{F}$  NMR (376 MHz,  $d^6$ -Acetone)  $\delta$  -86.3 (m, 3F), -115.9 (m, 2F), -129.2 (m, 2F), -130.7 (m, 2F).  $^{13}\text{C}$  NMR (101 MHz,  $d^6$ -Acetone)  $\delta$  168.4, 152.0, 143.6 (t,  $J = 9.4$  Hz), 133.1, 124.8, 122.6, 120.4, 120.0-105.0 (m), 117.3 (t,  $J = 22.7$  Hz), 115.9, 33.6, 24.1. MS (EI):  $m/z$  (%) 409 ( $\text{M}^+$ ), 367 (100). HRMS: Calculated for  $\text{C}_{15}\text{H}_{12}\text{F}_9\text{NO}_2$  ( $\text{M}^+$ ): 409.0724; Found: 409.0731.

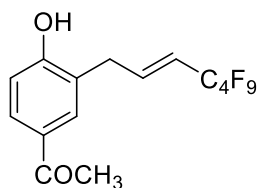

**(E)-1-(4-Hydroxy-3-(4,4,5,5,6,6,7,7,7-nonafluorohept-2-en-1-yl)phenyl)ethan-1-one (6q).** The product (83 mg, 70% yield) was purified with silica gel chromatography (Petroleum ether/Ethyl acetate = 12:1) as white solid.  $^1\text{H}$  NMR (400 MHz,  $\text{CDCl}_3$ )  $\delta$  7.81 (dd,  $J = 8.6$  Hz, 1.8 Hz, 1H), 7.77 (s, 1H), 6.88 (d,  $J = 8.4$  Hz, 1H), 6.79 (s, 1H), 6.65-6.53 (m, 1H), 5.62 (dd,  $J = 27.2$  Hz, 12.4 Hz, 1H), 3.58 (m, 2H), 2.56 (s, 3H).  $^{19}\text{F}$  NMR (376 MHz,  $\text{CDCl}_3$ )  $\delta$  -80.1 (m, 3F), -110.7 (m, 2F), -123.4 (m, 2F), -124.9 (m, 2F).  $^{13}\text{C}$  NMR (101 MHz,  $\text{CDCl}_3$ )  $\delta$  197.9, 158.8, 140.3 (t,  $J = 9.1$  Hz), 131.5, 130.2, 129.7, 124.2, 120.0-105.0 (m), 118.0 (t,  $J = 23.2$  Hz), 115.3, 32.7, 26.2. MS (EI):  $m/z$  (%) 394 ( $\text{M}^+$ ), 379 (100), 359. HRMS: Calculated for  $\text{C}_{15}\text{H}_{11}\text{F}_9\text{O}_2$  ( $\text{M}^+$ ): 394.0615; Found: 394.0617.

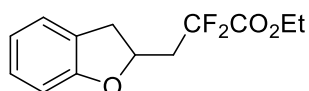

**Ethyl 3-(2,3-dihydrobenzofuran-2-yl)-2,2-difluoropropanoate (7a).** This compound is known.<sup>9</sup> The product (31.5 mg, 41% yield) was purified with silica gel chromatography (Petroleum ether /Ethyl acetate = 10:1) as colorless oil.  $^1\text{H}$  NMR (400 MHz,  $\text{CDCl}_3$ )  $\delta$  7.17 (d,  $J = 7.2$  Hz, 1H), 7.11 (t,  $J = 7.8$  Hz, 1H), 6.86 (t,  $J = 7.4$  Hz, 1H), 6.72 (d,  $J = 8.0$  Hz, 1H), 5.06-4.99 (m, 1H), 4.40-4.32 (m, 2H), 3.42 (dd,  $J = 15.6, 8.8$  Hz, 1H), 2.94 (dd,  $J = 15.6, 7.2$  Hz, 1H), 2.80-2.65 (m, 1H), 2.46-2.34 (m, 1H), 1.36 (t,  $J = 7.2$  Hz, 3H).  $^{19}\text{F}$  NMR (376 MHz,  $\text{CDCl}_3$ )  $\delta$  -101.5 – -102.5 (m, 1F), -107.4 – -108.4 (m, 1F).  $^{13}\text{C}$  NMR (101 MHz,  $\text{CDCl}_3$ )  $\delta$  163.7 (t,  $J = 31.4$  Hz), 158.6, 128.2, 125.7, 124.9, 120.8, 114.7 (t,  $J = 249.9$  Hz), 109.6, 76.5 (dd,  $J = 7.3, 2.9$  Hz), 63.0, 40.8 (t,  $J = 23.1$  Hz), 35.8, 13.9. MS (EI):  $m/z$  (%) 256 ( $\text{M}^+$ ), 256, 133 (100), 91. HRMS (EI): Calculated for  $\text{C}_{13}\text{H}_{14}\text{F}_2\text{O}_3$  ( $\text{M}^+$ ): 256.0911; Found: 256.0914.

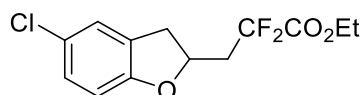

**Ethyl 3-(5-chloro-2,3-dihydrobenzofuran-2-yl)-2,2-difluoropropanoate (7b).** The product (45 mg, 52% yield) was purified with silica gel chromatography (Petroleum ether/Ethyl acetate = 10:1) as colorless liquid.  $^1\text{H}$  NMR (400 MHz,  $\text{CDCl}_3$ )  $\delta$  7.12 (s, 1H), 7.06 (dd,  $J = 8.2$  Hz, 2.2 Hz, 1H), 6.62 (d,  $J = 8.8$  Hz, 1H), 5.08-5.01 (m, 1H), 4.39-4.31 (m, 2H), 3.39 (dd,  $J = 15.8$  Hz, 9.0 Hz, 1H), 2.93 (dd,  $J = 15.8$  Hz, 7.2 Hz, 1H), 2.78-2.63 (m, 1H), 2.45-2.34 (m, 1H), 1.35 (t,  $J = 7.0$  Hz, 3H).  $^{19}\text{F}$  NMR (376 MHz,  $\text{CDCl}_3$ )  $\delta$  -101.7 – -102.4 (m, 1F), -107.3 – -108.1 (m, 1H).  $^{13}\text{C}$  NMR (101 MHz,  $\text{CDCl}_3$ )  $\delta$  163.6 (t,  $J = 32.2$  Hz), 157.3, 128.1, 127.7, 125.5, 125.0, 114.6 (t,  $J = 251.9$  Hz), 110.4, 77.2 (dd,  $J = 7.2, 3.2$  Hz), 63.1, 40.6 (t,  $J = 23.2$  Hz), 35.6, 13.9. MS (EI):  $m/z$  (%) 292 ( $\text{M}^+$ ), 290 (100) ( $\text{M}^+$ ), 167, 125. HRMS (EI): Calculated for  $\text{C}_{13}\text{H}_{13}\text{F}_2\text{ClO}_3$  ( $\text{M}^+$ ): 290.0521; Found: 290.0520.

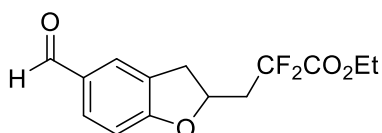

**Ethyl 2,2-difluoro-3-(5-formyl-2,3-dihydrobenzofuran-2-yl)propanoate (7c).** The product (64 mg, 75% yield) was purified with silica gel chromatography (Petroleum ether /Ethyl acetate = 10:1) as colorless liquid.  $^1\text{H}$  NMR (400 MHz,  $\text{CDCl}_3$ )  $\delta$  9.82 (s, 1H), 7.73 (s, 1H), 7.67 (d,  $J = 8.0$  Hz, 1H), 6.82 (d,  $J = 8.4$  Hz, 1H), 5.20-5.10 (m, 1H), 4.35 (q,  $J = 6.8$  Hz, 2H), 3.48 (dd,  $J = 16.0, 9.2$  Hz, 1H), 3.00 (dd,  $J = 15.6, 7.2$  Hz, 1H), 2.82-2.65 (m, 1H), 2.52-2.38 (m, 1H), 1.36 (t,  $J = 7.2$  Hz, 3H).  $^{19}\text{F}$  NMR (376 MHz,  $\text{CDCl}_3$ )  $\delta$  -109.1 – -109.9 (m, 1F), -114.2 – -115.0 (m, 1H).  $^{13}\text{C}$  NMR (101 MHz,  $\text{CDCl}_3$ )  $\delta$  190.5, 164.0, 163.5 (t,  $J = 32.2$  Hz), 133.1, 130.8, 127.3, 126.0, 114.4 (t,  $J = 252.3$  Hz), 109.8, 78.2 (dd,  $J = 6.9, 3.1$  Hz), 63.1, 40.6 (t,  $J = 23.3$  Hz), 34.8, 13.9. MS (EI):  $m/z$  (%) 284 ( $\text{M}^+$ ), 133, 91 (100). HRMS (EI): Calculated for  $\text{C}_{14}\text{H}_{14}\text{F}_2\text{O}_4$  ( $\text{M}^+$ ): 284.0860; Found: 284.0865.

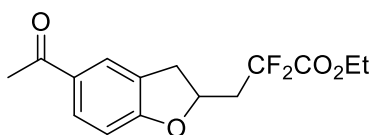

**Ethyl 3-(5-acetyl-2,3-dihydrobenzofuran-2-yl)-2,2-difluoropropanoate (7d).** This compound is

known.<sup>9</sup> The product (61 mg, 68% yield) was purified with silica gel chromatography (Petroleum ether/Ethyl acetate = 10:1) as colorless liquid. <sup>1</sup>H NMR (400 MHz, CDCl<sub>3</sub>) δ 7.83 (s, 1H), 7.80 (dd, *J* = 8.4 Hz, 1.6 Hz, 1H), 6.74 (d, *J* = 8.4 Hz, 1H), 5.17-5.09 (m, 1H), 4.40-4.30 (m, 2H), 3.42 (dd, *J* = 16.0 Hz, 9.2 Hz, 1H), 2.98 (dd, *J* = 15.6 Hz, 6.8 Hz, 1H), 2.80-2.66 (m, 1H), 2.54 (s, 3H), 2.50-2.38 (m, 1H), 1.36 (t, *J* = 7.2 Hz, 3H). <sup>19</sup>F NMR (376 MHz, CDCl<sub>3</sub>) δ -101.5 – -102.8 (m, 1F), -107.0 – -108.2 (m, 1F). <sup>13</sup>C NMR (101 MHz, CDCl<sub>3</sub>) δ 196.6, 163.6 (t, *J* = 31.6 Hz), 162.8, 131.1, 130.6, 126.5, 125.6, 114.5 (t, *J* = 252.1 Hz), 109.2, 78.0 (dd, *J* = 7.0, 3.1 Hz), 63.1, 40.7 (t, *J* = 23.3 Hz), 35.1, 26.4, 13.9. MS (EI): *m/z* (%) 298 (M<sup>+</sup>), 283 (100), 255. HRMS (EI): Calculated for C<sub>15</sub>H<sub>16</sub>F<sub>2</sub>O<sub>4</sub> (M<sup>+</sup>): 298.1017; Found: 298.1012.

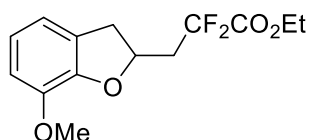

**Ethyl 2,2-difluoro-3-(7-methoxy-2,3-dihydrobenzofuran-2-yl)propanoate (7e).** This compound is known.<sup>9</sup> The product (39 mg, 45% yield) was purified with silica gel chromatography (Petroleum ether/Ethyl acetate = 10:1) as colorless liquid. <sup>1</sup>H NMR (400 MHz, CDCl<sub>3</sub>) δ 6.84-6.78 (m, 2H), 6.74 (dd, *J* = 7.6 Hz, 1.2 Hz, 1H), 5.10-5.03 (m, 1H), 4.40-4.30 (m, 2H), 3.84 (s, 3H), 3.42 (dd, *J* = 15.6 Hz, 9.2 Hz, 1H), 3.00 (dd, *J* = 15.6 Hz, 7.4 Hz, 1H), 2.87-2.73 (m, 1H), 2.50-2.38 (m, 1H), 1.34 (t, *J* = 7.2 Hz, 3H). <sup>19</sup>F NMR (376 MHz, CDCl<sub>3</sub>) δ -101.8 – -102.6 (m, 1F), -107.1 – -108.1 (m, 1F). <sup>13</sup>C NMR (101 MHz, CDCl<sub>3</sub>) δ 163.6 (t, *J* = 32.2 Hz), 146.9, 144.5, 127.1, 121.5, 117.1, 114.7 (t, *J* = 251.7 Hz), 111.4, 77.2 (dd, *J* = 6.9, 3.1 Hz), 63.1, 55.8, 40.6 (t, *J* = 22.9 Hz), 36.2, 13.8. MS (EI): *m/z* (%) 286 (100) (M<sup>+</sup>), 246, 131. HRMS (EI): Calculated for C<sub>14</sub>H<sub>16</sub>F<sub>2</sub>O<sub>4</sub> (M<sup>+</sup>): 286.1017; Found: 286.1014.

## 5. References.

- [1] W.-L. Deng, Y.-J. Li, Y.-G. Li, H.-L. Bao, *Synthesis*. **2018**, 50, 2974.
- [2] F.-H. Xiao, F.-H. Wu, Y.-J. Shen, L.-F. Zhou, *J. Fluorine Chem.*, **2005**, 126, 63.
- [3] I. Behrends, S. Bähr, C. Czekelius, *Chem. -Eur. J.*, **2016**, 22, 17177.

- [4] R. Beniazza, L. Remisse, D. Jardel, D. Lastécouères, J-M. Vincent, *Chem. Commun.* **2018**, 54, 7451.
- [5] T. Xu, C.-W. Cheung, X. Hu, *Angew. Chem. Int. Ed.*, **2014**, 53, 4910.
- [6] J.-J. Ma, W.-B. Yi, *Org. Biomol. Chem.*, **2017**, 15, 4295.
- [7] J.-J. Zhong, C. Yang, X.-Y. Chang, C. Zou, W. Lu, C. -M. Che, *Chem. Commun.* **2017**, 53, 8948.
- [8] M.-L. Ke, Q. Feng, K. Yang, Q.-L. Song, *Org. Chem. Front.*, **2016**, 3, 150.
- [9] J.-H. Liao, L.-F. Fan, W. Guo, Z.-M. Zhang, J.-W. Li, C.-L. Zhu, Y.-W. Ren, W.-Q. Wu, H.-F. Jiang, *Org. Lett.*, **2017**, 19, 1008.

## 6. Mechanism studies.

### 6.1 Addition of radical and SET inhibitors:

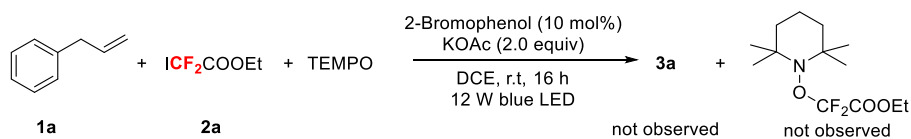

When the radical scavenger TEMPO (2,2,6,6-tetromethyl-1-piperidinyloxy, 1.0 equiv) was added under standard conditions, product **3a** was not observed.

### 6.2 Radical clock experiments.

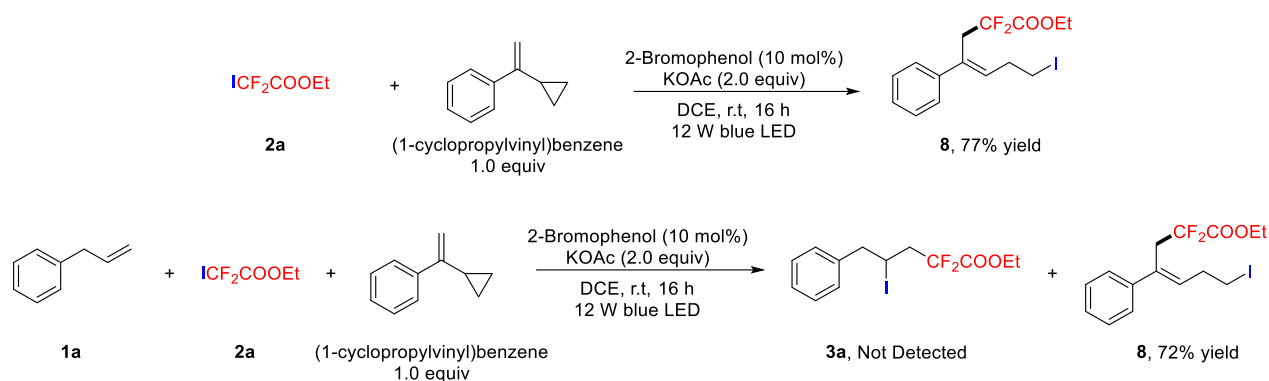

**Typical procedure:** To a 25 mL of Schlenk tube equipped with a Teflon septum were added KOAc (0.6 mmol, 2.0 equiv) under Ar, followed by DCE (2 mL) with stirring. allylbenzene (**1a**) (0.3 mmol, 1.0 equiv) (or without **1a**), 2-bromophenol (0.03mmol, 0.1 equiv),  $\text{ICF}_2\text{COOEt}$  (**2**) (0.6 mmol, 2.0 equiv) and  $\alpha$ -cyclopropylstyrene (0.3 mmol, 1.0 equiv) were added subsequently. After stirring for 16 h, the reaction mixture was diluted with Ethyl acetate, washed with brine, dried over anhydrous  $\text{Na}_2\text{SO}_4$ , filtered and concentrated. The residue was purified with silica gel chromatography to provide pure product.

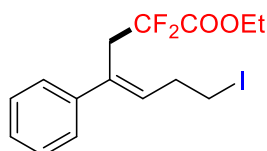

**Ethyl (E)-2,2-difluoro-7-iodo-4-phenylhept-4-enoate (8).** The product (91 mg, 77% yield) was purified with silica gel chromatography (Petroleum ether/Ethyl acetate = 50:1) as colorless liquid.  $^1\text{H}$  NMR (400 MHz,  $\text{CDCl}_3$ )  $\delta$  7.30-7.19 (m, 5H), 5.79 (t,  $J = 7.2$  Hz, 1H), 3.83 (q,  $J = 7.2$  Hz, 2H),

3.29 (t,  $J = 15.6$  Hz, 2H), 3.19 (t,  $J = 7.0$  Hz, 2H), 2.81 (q,  $J = 7.2$  Hz, 2H), 1.09 (t,  $J = 7.2$  Hz, 3H).  
 $^{19}\text{F}$  NMR (376 MHz,  $\text{CDCl}_3$ )  $\delta$  -103.2 – -103.8 (m, 2F).  $^{13}\text{C}$  NMR (101 MHz,  $\text{CDCl}_3$ )  $\delta$  163.6 (t,  $J = 32.6$  Hz), 141.5, 134.2, 132.1 (t,  $J = 4.2$  Hz), 128.2, 127.4, 126.6, 114.8 (t,  $J = 253.6$  Hz), 62.7, 35.6 (t,  $J = 24.7$  Hz), 32.8, 13.5, 4.34. MS (EI):  $m/z$  (%) 394 ( $\text{M}^+$ ), 267, 129 (100). HRMS (EI):  
 Calculated for  $\text{C}_{15}\text{H}_{17}\text{F}_2\text{IO}_2$  ( $\text{M}^+$ ): 394.0241; Found: 394.0230.

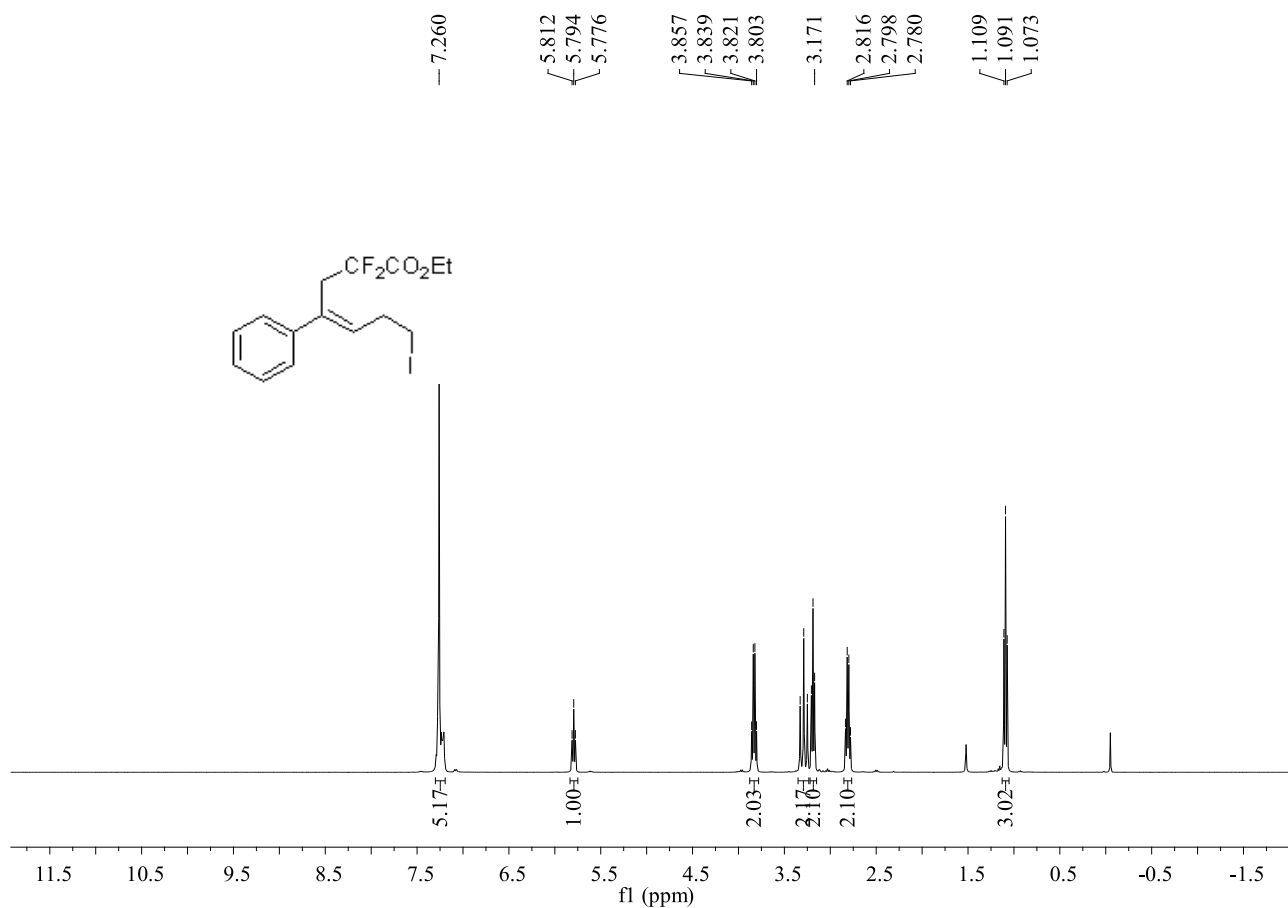

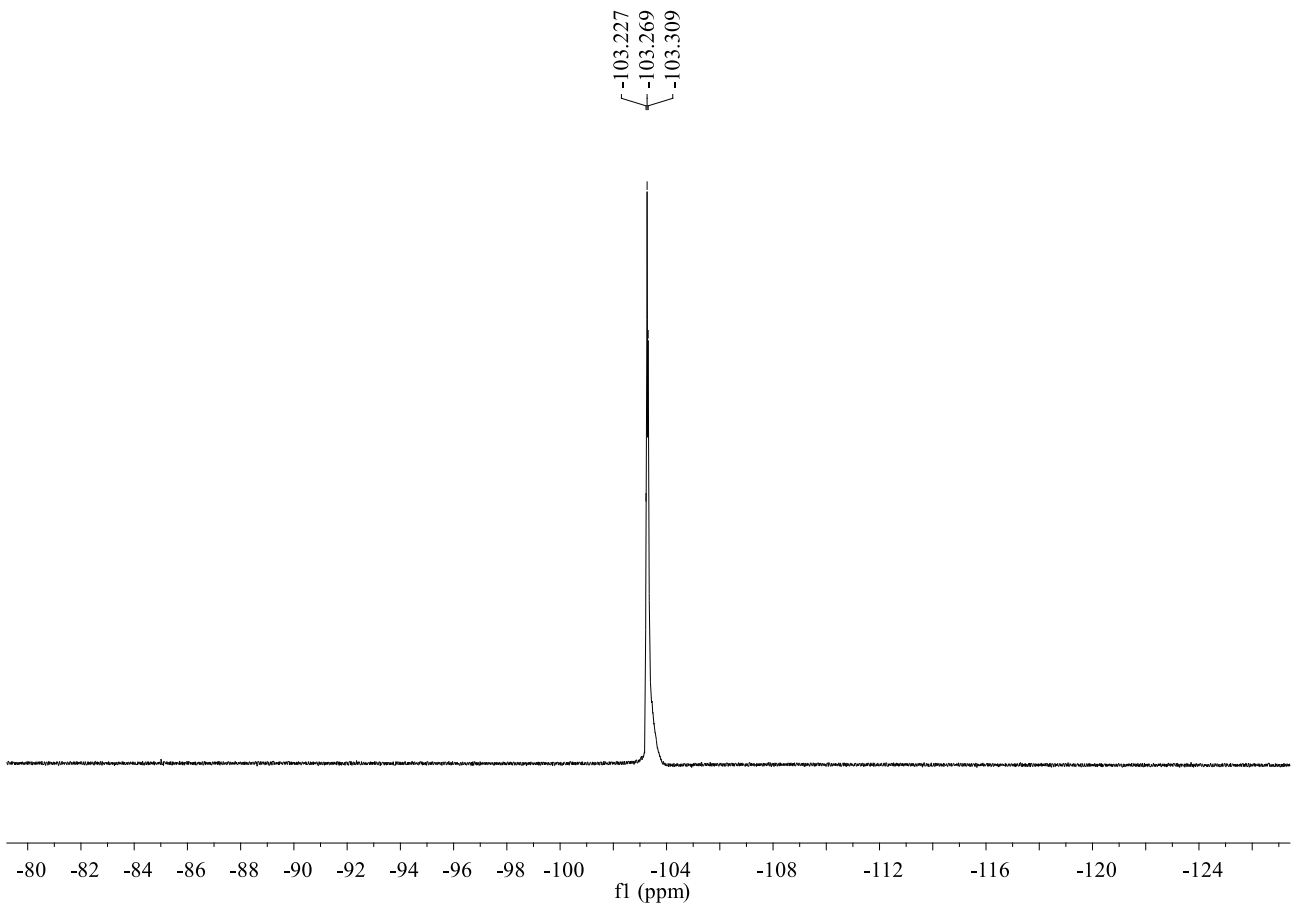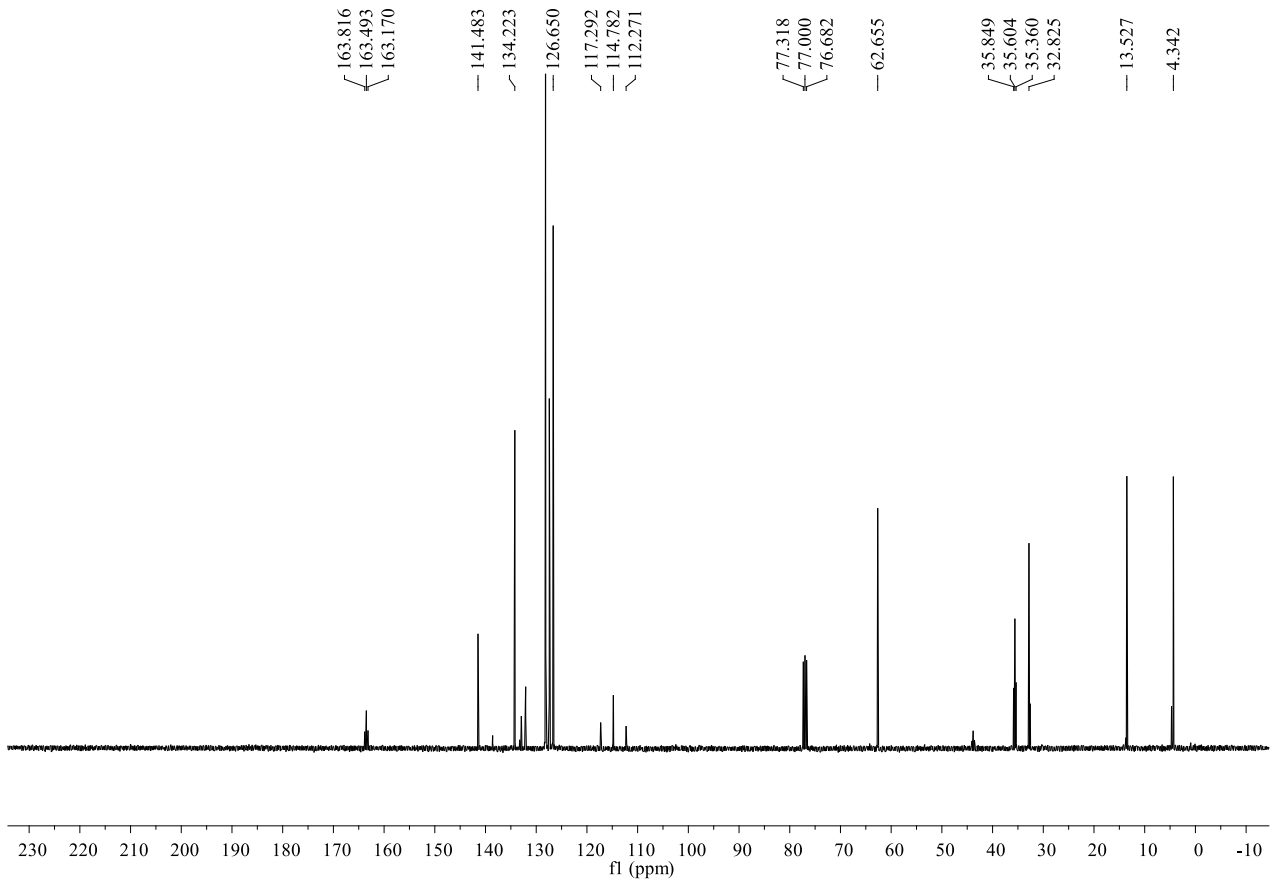



### 6.3 UV-vis spectroscopic measurement.

Solution 1: **2a** (176.4  $\mu\text{L}$ , 1.2 mmol), 2-bromophenol (7.0  $\mu\text{L}$ , 0.06 mmol) and KOAc (117.8 mg, 1.2 mmol) was dissolved in DCE (4.0 mL). The mixtures were stirred for 30 seconds, filtered before use.

Solution 2: **2a** (176.4  $\mu\text{L}$ , 1.2 mmol) and 2-bromophenol (7.0  $\mu\text{L}$ , 0.06 mmol) was dissolved in DCE (4.0 mL). The mixtures were stirred for 30 seconds, filtered before use.

Solution 3: **2a** (176.4  $\mu\text{L}$ , 1.2 mmol) and KOAc (117.8 mg, 1.2 mmol) was dissolved in DCE (4.0 mL). The mixtures were stirred for 30 seconds, filtered before use.

Solution 4: **2a** (176.4  $\mu\text{L}$ , 1.2 mmol) was dissolved in DCE (4.0 mL). The mixtures were stirred for 30 seconds, filtered before use.

Solution 5: 2-bromophenol (11.6  $\mu\text{L}$  0.1 mmol) and KOAc (117.8 mg, 1.2 mmol) was dissolved in DCE (4.0 mL). The mixtures were stirred for 30 seconds, filtered before use.

Performed on UV visible spectrophotometer, recorded in 1cm path quartz cuvettes using T6 Xinyue visible spectrophotometer (PERSEE<sup>TM</sup>), pure DCE as blank sample.

| A<br>$\lambda$ (nm) | <b>2a</b> +<br>2-bromophenol<br>+ KOAc +DCE<br>A <sub>1</sub> | <b>2a</b> +<br>2-bromophenol<br>+ DCE<br>A <sub>2</sub> | <b>2a</b> +<br>KOAc +DCE<br>A <sub>3</sub> | <b>2a</b> +DCE<br>A <sub>4</sub> | 2-bromophenol<br>+ KOAc +DCE<br>A <sub>5</sub> |
|---------------------|---------------------------------------------------------------|---------------------------------------------------------|--------------------------------------------|----------------------------------|------------------------------------------------|
| 360                 | 3.044                                                         | 1.069                                                   | 1.223                                      | 1.071                            | 0.061                                          |
| 370                 | 2.967                                                         | 0.549                                                   | 0.709                                      | 0.548                            | 0.054                                          |
| 380                 | 2.677                                                         | 0.264                                                   | 0.411                                      | 0.260                            | 0.055                                          |
| 390                 | 2.253                                                         | 0.133                                                   | 0.258                                      | 0.126                            | 0.053                                          |
| 400                 | 1.570                                                         | 0.087                                                   | 0.185                                      | 0.078                            | 0.051                                          |
| 410                 | 1.099                                                         | 0.079                                                   | 0.149                                      | 0.071                            | 0.047                                          |
| 420                 | 0.788                                                         | 0.103                                                   | 0.153                                      | 0.094                            | 0.046                                          |
| 430                 | 0.568                                                         | 0.161                                                   | 0.194                                      | 0.153                            | 0.043                                          |
| 440                 | 0.430                                                         | 0.249                                                   | 0.270                                      | 0.242                            | 0.047                                          |
| 450                 | 0.325                                                         | 0.373                                                   | 0.381                                      | 0.367                            | 0.042                                          |
| 460                 | 0.247                                                         | 0.520                                                   | 0.515                                      | 0.515                            | 0.042                                          |
| 470                 | 0.192                                                         | 0.660                                                   | 0.644                                      | 0.653                            | 0.043                                          |
| 480                 | 0.148                                                         | 0.792                                                   | 0.767                                      | 0.787                            | 0.040                                          |
| 490                 | 0.120                                                         | 0.874                                                   | 0.843                                      | 0.868                            | 0.041                                          |
| 500                 | 0.100                                                         | 0.897                                                   | 0.865                                      | 0.889                            | 0.040                                          |
| 510                 | 0.086                                                         | 0.857                                                   | 0.840                                      | 0.851                            | 0.040                                          |
| 520                 | 0.075                                                         | 0.776                                                   | 0.772                                      | 0.771                            | 0.037                                          |

|            |       |       |       |       |       |
|------------|-------|-------|-------|-------|-------|
| <b>530</b> | 0.065 | 0.652 | 0.644 | 0.648 | 0.035 |
| <b>540</b> | 0.056 | 0.527 | 0.510 | 0.524 | 0.035 |
| <b>550</b> | 0.048 | 0.402 | 0.388 | 0.401 | 0.034 |
| <b>560</b> | 0.040 | 0.294 | 0.285 | 0.294 | 0.033 |
| <b>570</b> | 0.034 | 0.213 | 0.208 | 0.214 | 0.033 |
| <b>580</b> | 0.028 | 0.148 | 0.147 | 0.150 | 0.032 |
| <b>590</b> | 0.024 | 0.108 | 0.108 | 0.111 | 0.030 |
| <b>600</b> | 0.020 | 0.080 | 0.080 | 0.083 | 0.029 |
| <b>610</b> | 0.017 | 0.063 | 0.064 | 0.067 | 0.030 |
| <b>620</b> | 0.015 | 0.052 | 0.053 | 0.056 | 0.030 |
| <b>630</b> | 0.014 | 0.046 | 0.046 | 0.050 | 0.028 |
| <b>640</b> | 0.013 | 0.041 | 0.042 | 0.045 | 0.028 |
| <b>650</b> | 0.012 | 0.038 | 0.038 | 0.042 | 0.028 |

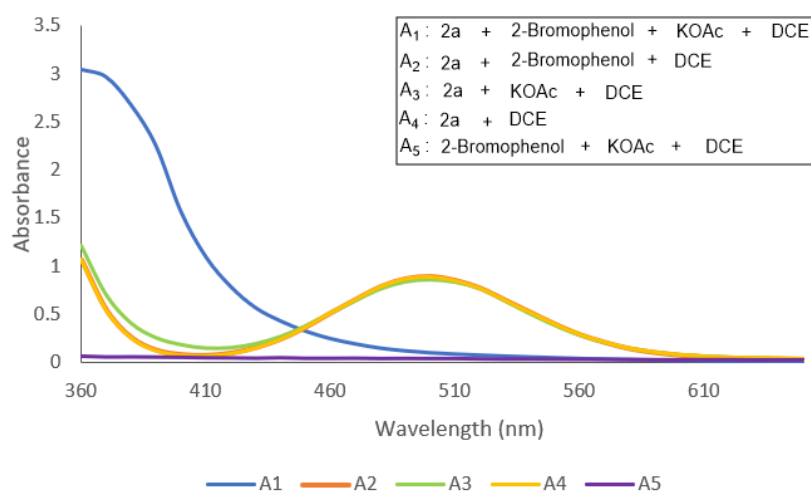

#### 6.4 The reaction of different time periods was examined by HPLC to detect the concentration of 2-bromophenol.

Making a standard curve

The solution A ( $c = 0.06$  mmol/mL): mixed 2-bromophenol (69.6  $\mu$ L, 0.6 mmol) and DCE (10.0 mL)

The solution B ( $c = 0.03$  mmol/mL): mixed phenol (28.2 mg, 0.3 mmol) and DCE (10.0 mL)

Sample 1 (2 mL): mixed the solution A (0.17 mL), the solution B (1.00 mL) and DCE

Sample 2 (2 mL): mixed the solution A (0.33 mL), the solution B (1.00 mL) and DCE

Sample 3 (2 mL): mixed the solution A (0.50 mL), the solution B (1.00 mL) and DCE

Sample 4 (2 mL): mixed the solution A (0.67 mL), the solution B (1.00 mL) and DCE

Sample 5 (2 mL): mixed the solution A (0.83 mL), the solution B (1.00 mL) and DCE

Sample 6 (2 mL): mixed the solution A (1.00 mL), the solution B (1.00 mL) and DCE

All of the samples were determined by HPLC to measure the content of 2-bromophenol to make a standard curve. A phenol was selected as an internal standard. ( $V_{H_2O}$ :  $V_{MeCN}$  = 60:40, 1 mL/min, 254 nm, 25 °C, Inj Volume = 20  $\mu$ L, Time = 30 min).

To six 25 mL of Schlenk tubes equipped with Teflon septum were added KOAc (0.6 mmol, 2.0 equiv) under argon respectively, followed by DCE (2.0 ml) with stirring. 2-bromophenol (0.03 mmol, 0.1 equiv), allylbenzene (**1a**) (0.3 mmol, 1.0 equiv) and  $ICF_2COOEt$  (**2a**) (0.60 mmol, 2.0 equiv) were added subsequently. one Schlenk tube was removed. The remaining five Schlenk tubes were stirred at room temperature under 12w blue LEDs for 3 h, 6 h, 9 h, 12h and 16 h. After each reaction was stopped, 0.5 mL of phenol ( $C = 0.075$  mmol/mL) was added as an internal standard, subsequently filtered for HPLC detection.

| Entry | 2-bromophenol (A) |           |             | phenol (B)      |          |             | A/B    |
|-------|-------------------|-----------|-------------|-----------------|----------|-------------|--------|
|       | Ret. Time (min)   | Area      | C (mmol/mL) | Ret. Time (min) | Area     | C (mmol/mL) |        |
| 1     | 8.46              | 2470.858  | 0.005       | 5.581           | 6770.840 | 0.015       | 0.3649 |
| 2     | 8.49              | 4464.328  | 0.010       | 5.602           | 6742.690 | 0.015       | 0.6621 |
| 3     | 8.46              | 6739.670  | 0.015       | 5.581           | 6807.432 | 0.015       | 0.9900 |
| 4     | 8.48              | 8506.987  | 0.020       | 5.573           | 6782.561 | 0.015       | 1.2542 |
| 5     | 8.48              | 10753.571 | 0.025       | 5.590           | 6732.406 | 0.015       | 1.5973 |
| 6     | 8.47              | 12933.962 | 0.030       | 5.588           | 6537.696 | 0.015       | 1.9784 |

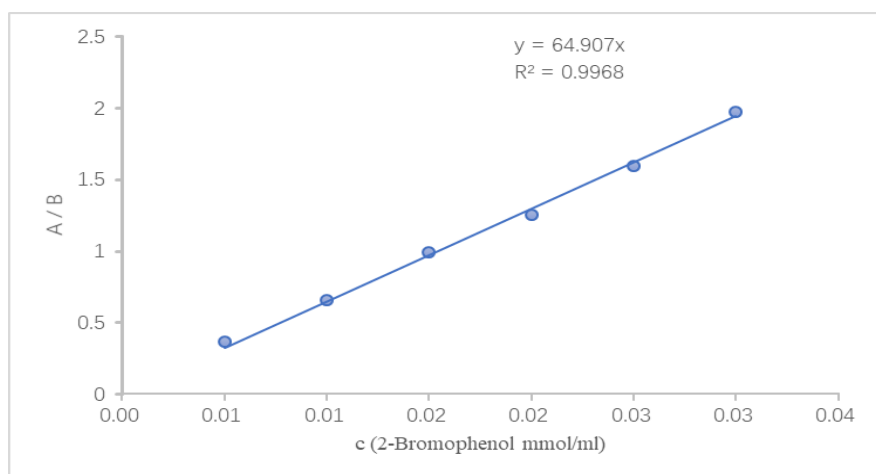

Standard curve of 2-bromophenol using phenol as internal standard

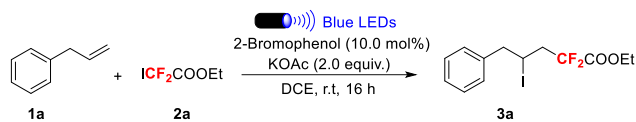

| Entry | Area A<br>(2-bromophenol) | Area B<br>(Phenol) | A/B (y) | Calculated<br>concentration A<br>( $y=64.907x$<br>mmol/mL) | Actual<br>concentration A<br>(mmol/mL) |
|-------|---------------------------|--------------------|---------|------------------------------------------------------------|----------------------------------------|
| 0 h   | 5214.82                   | 6276.87            | 0.8308  | 0.0128                                                     | 0.0120                                 |
| 3 h   | 4636.90                   | 5946.84            | 0.7797  | 0.0120                                                     | 0.0120                                 |
| 6 h   | 5040.79                   | 6776.42            | 0.7439  | 0.0115                                                     | 0.0120                                 |
| 9 h   | 4911.38                   | 6566.38            | 0.7479  | 0.0115                                                     | 0.0120                                 |
| 12 h  | 4594.28                   | 6279.82            | 0.7316  | 0.0113                                                     | 0.0120                                 |
| 16 h  | 4723.24                   | 6399.03            | 0.7381  | 0.0114                                                     | 0.0120                                 |

**6.5 No products were observed when phenolic hydroxyl group was protected or in the absence of hydroxyl group.**

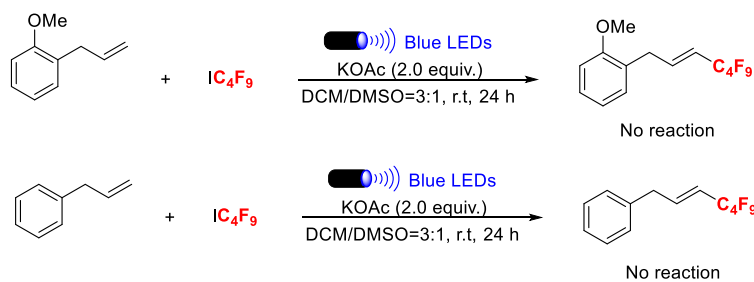

**6.6 Transform 3a to 6a in the presence of  $K_2CO_3$  and DMSO.**

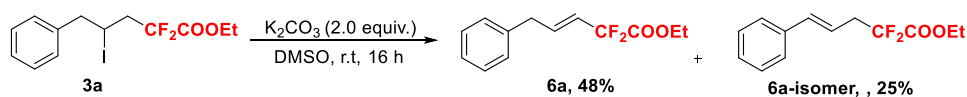

## 7. Copies of NMR spectra of 3, 5, 6, 7.

### Ethyl 2,2-difluoro-4-iodo-5-phenylpentanoate (3a).

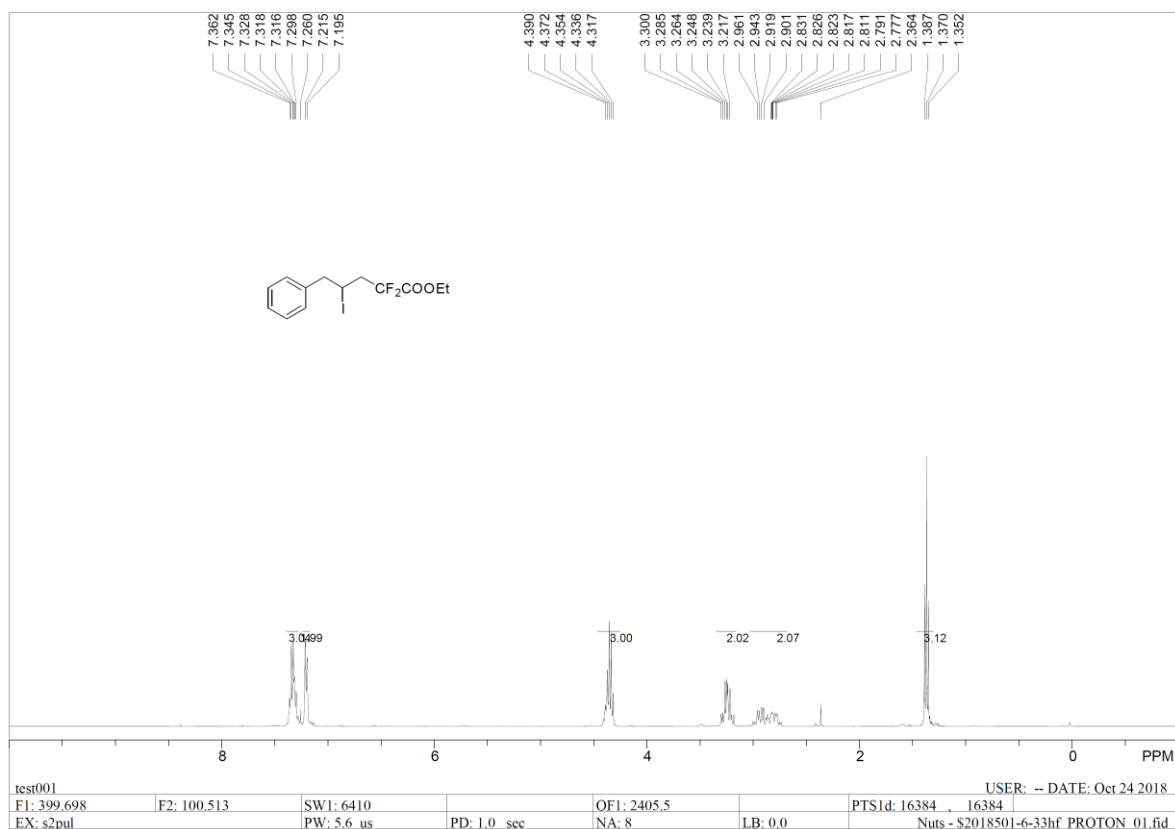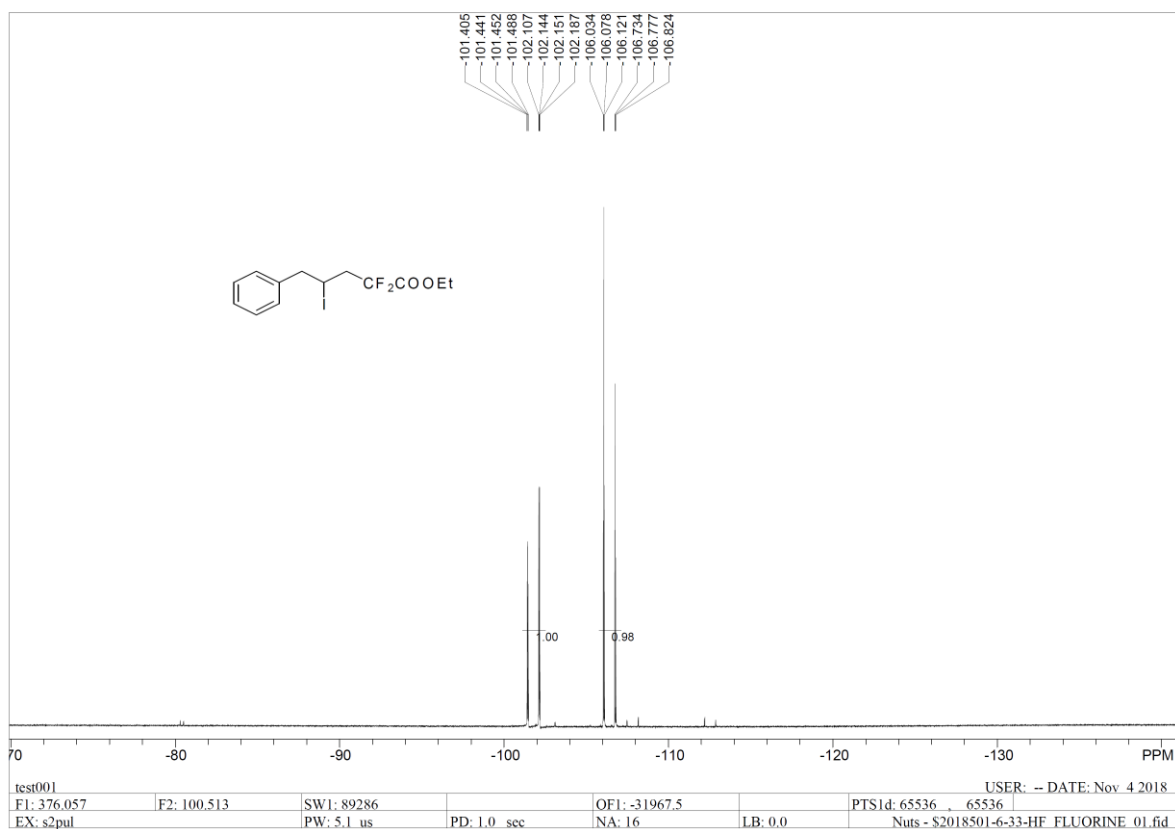

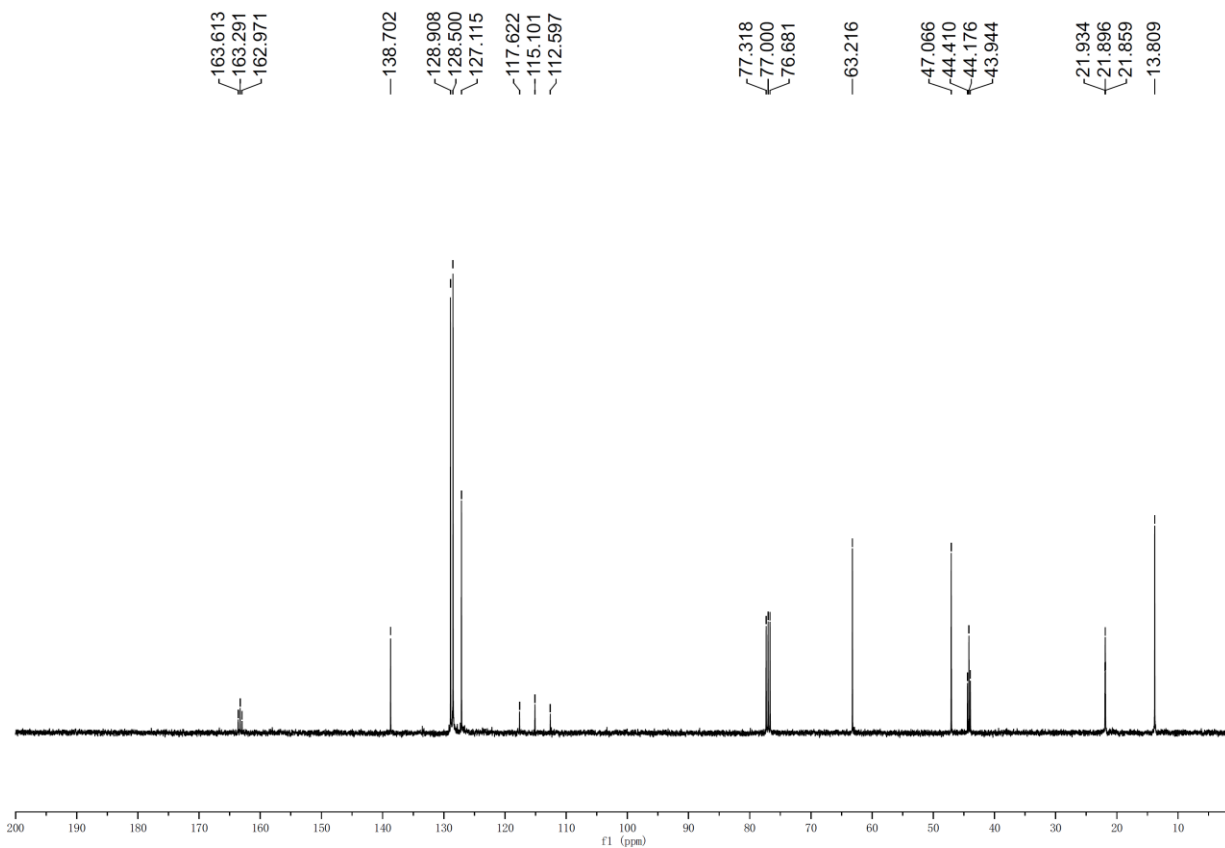

**Ethyl 2,2-difluoro-4-iodo-5-(4-methoxyphenyl)pentanoate (3b).**

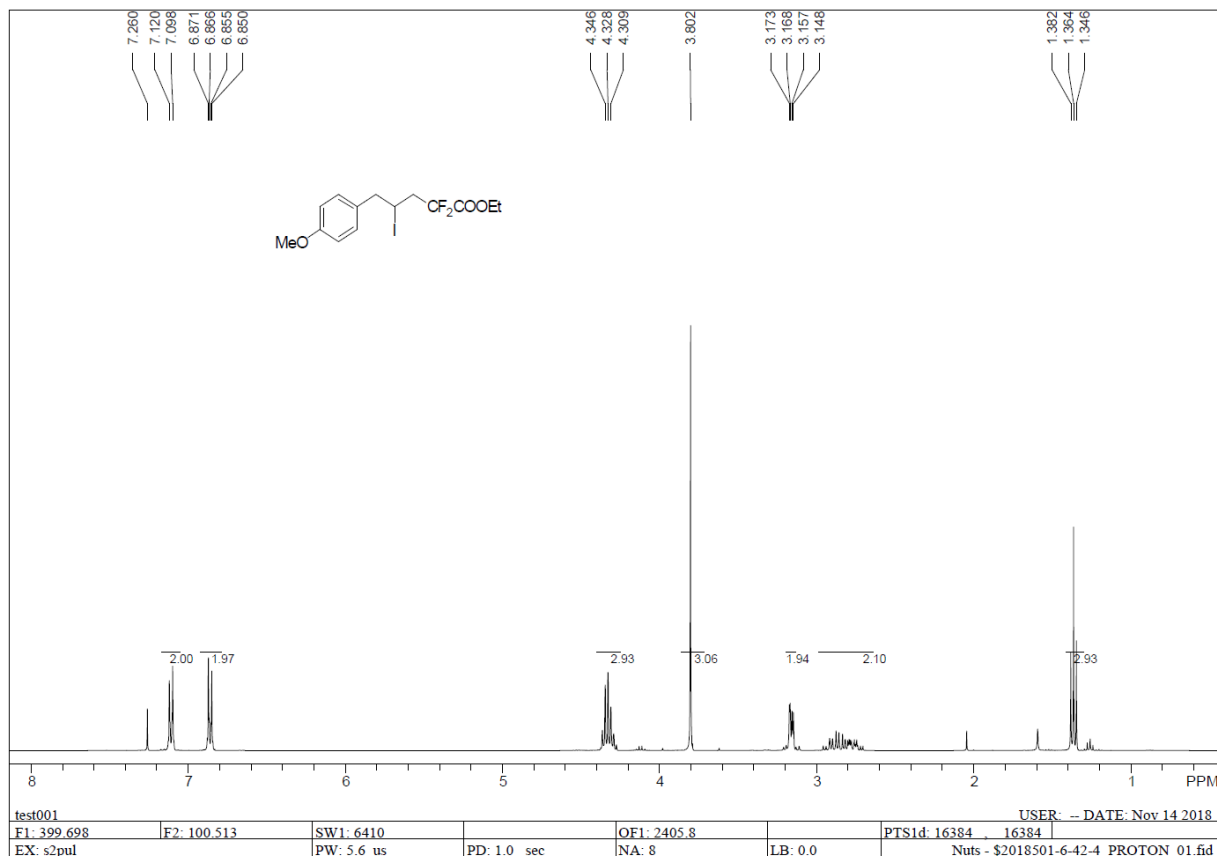

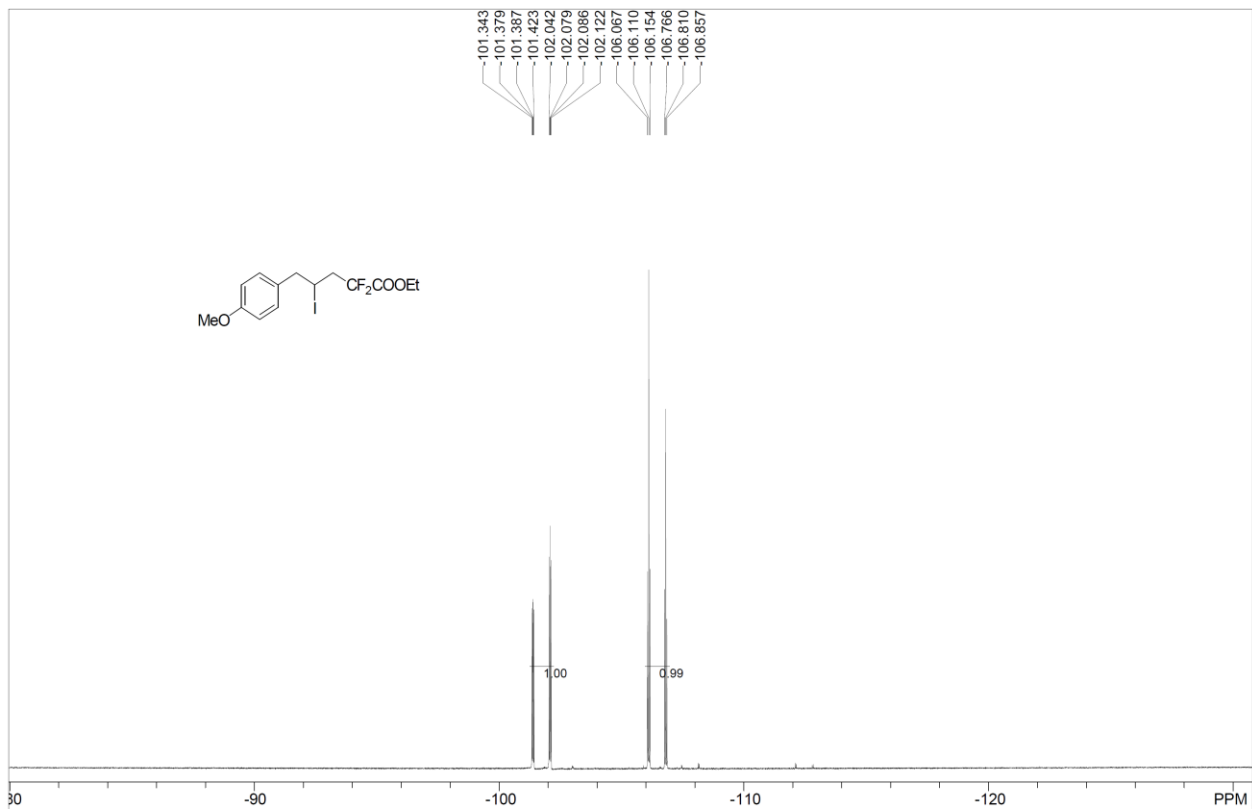

test001  
 F1: 376.057 F2: 100.513 SW1: 89286 OF1: -31967.5 PTS1d: 65536 65536 USER: -- DATE: Nov 14 2018  
 EX: s2pul PW: 5.1 us PD: 1.0 sec NA: 16 LB: 0.0 Nuts - S2018501-6-42-4\_FLUORINE\_01.fid

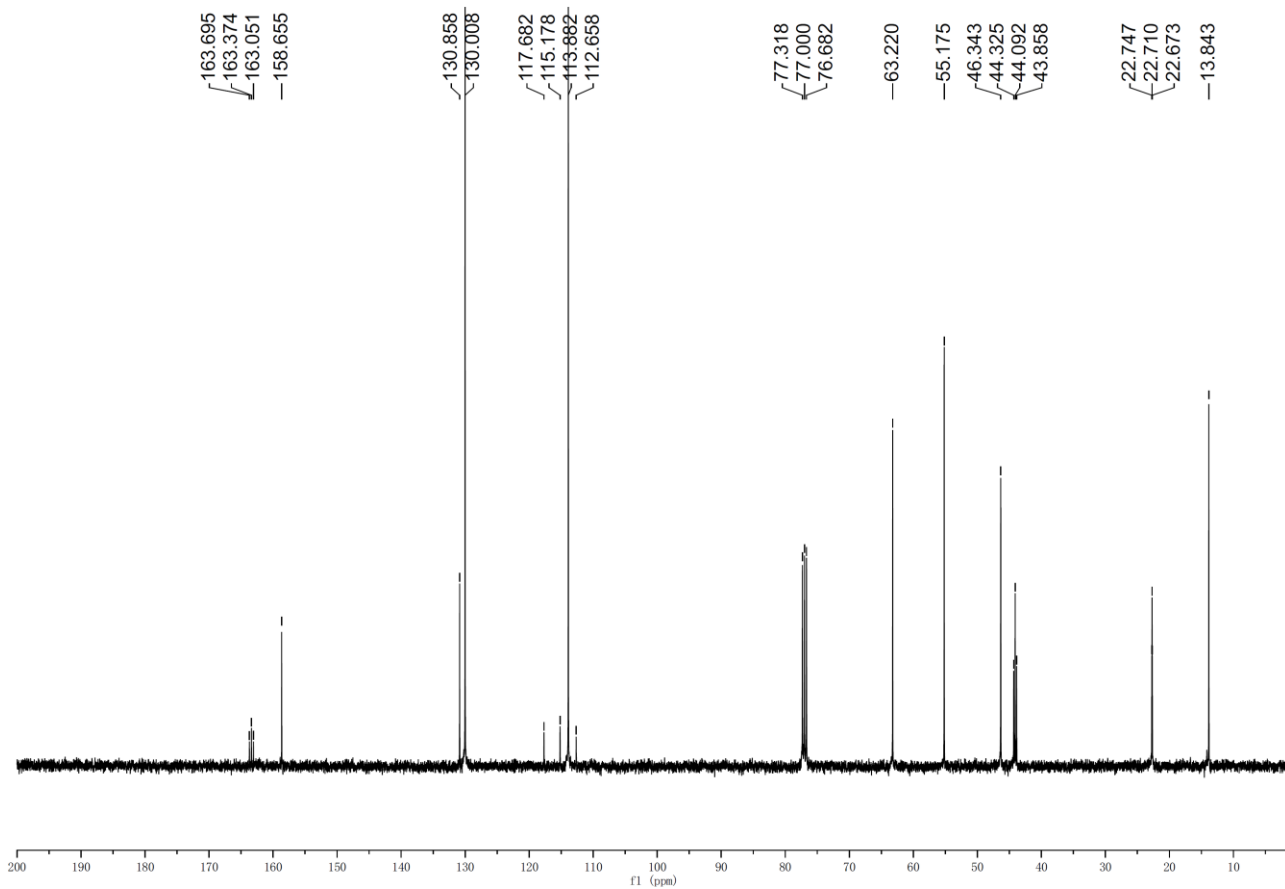

**Ethyl 2,2-difluoro-4-iodo-5-(perfluorophenyl)pentanoate (3c).**

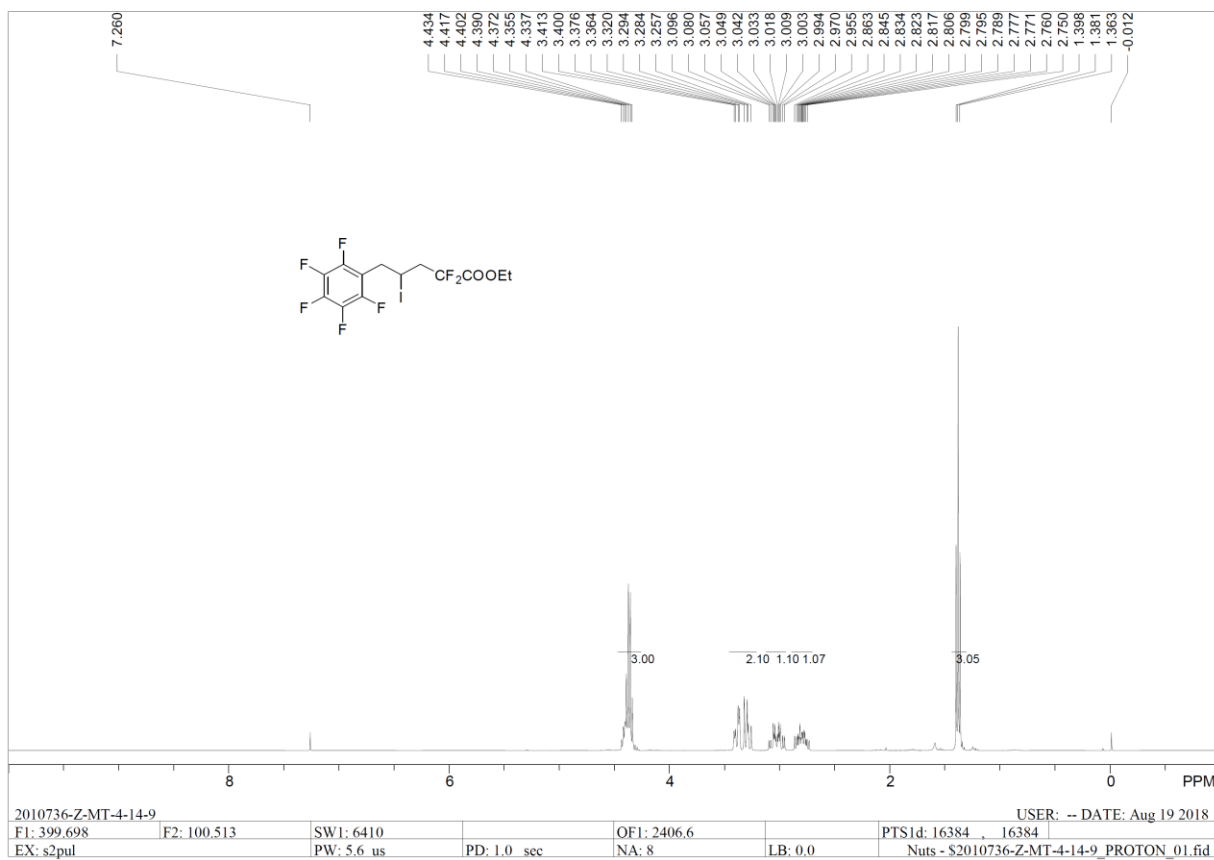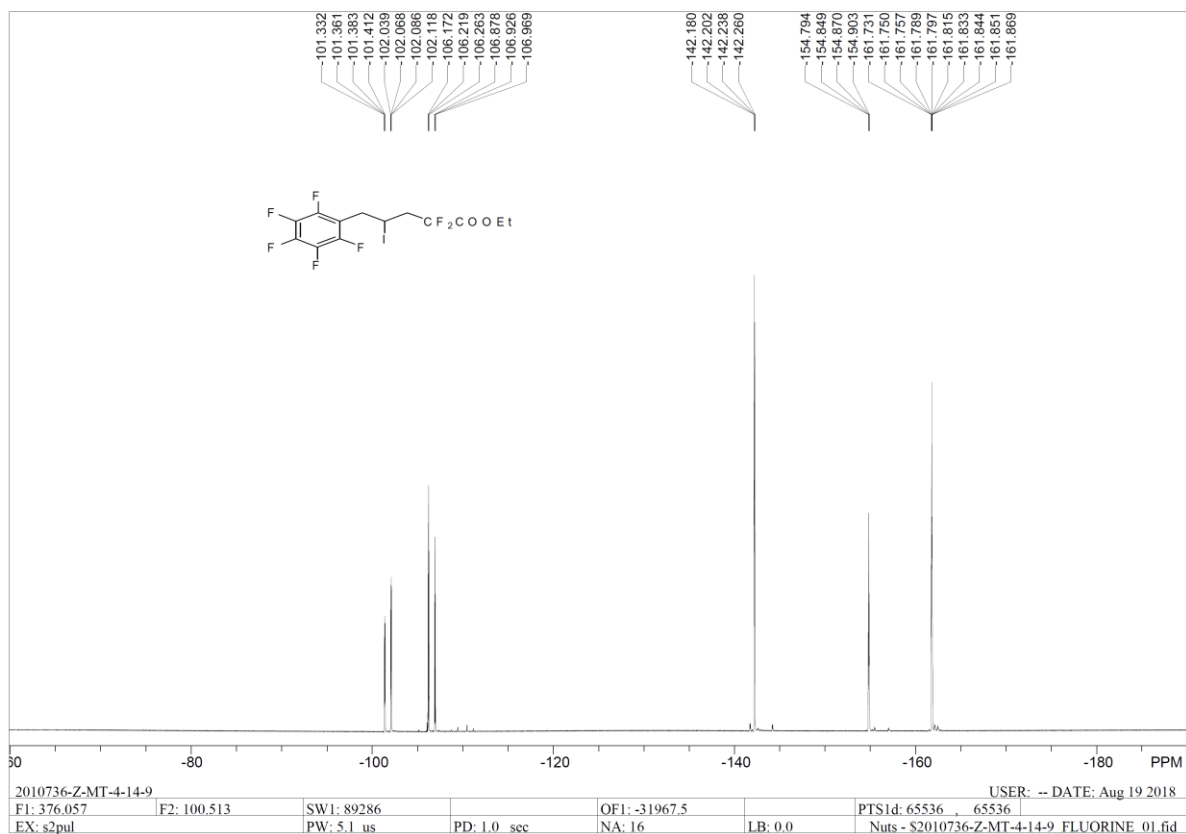



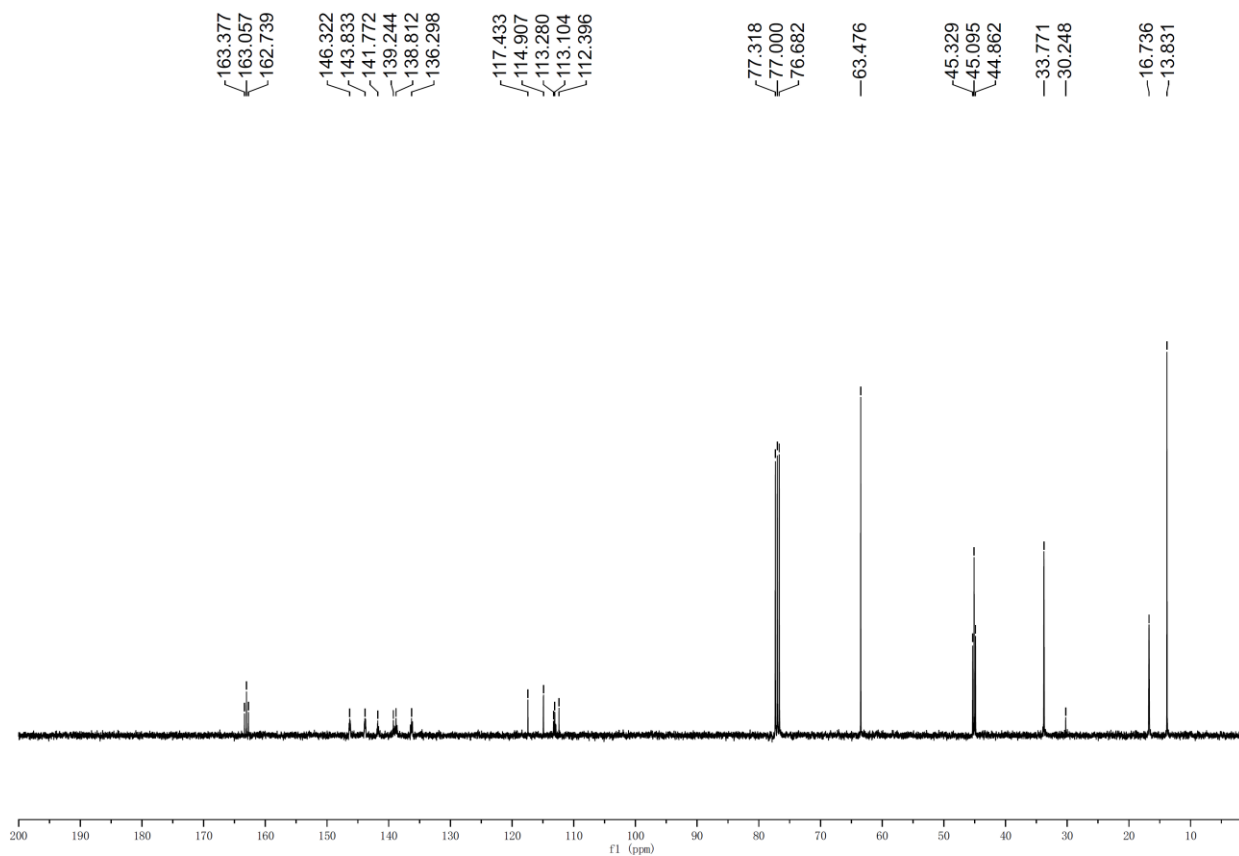

**Ethyl 2,2-difluoro-4-iododecanoate (3d).**

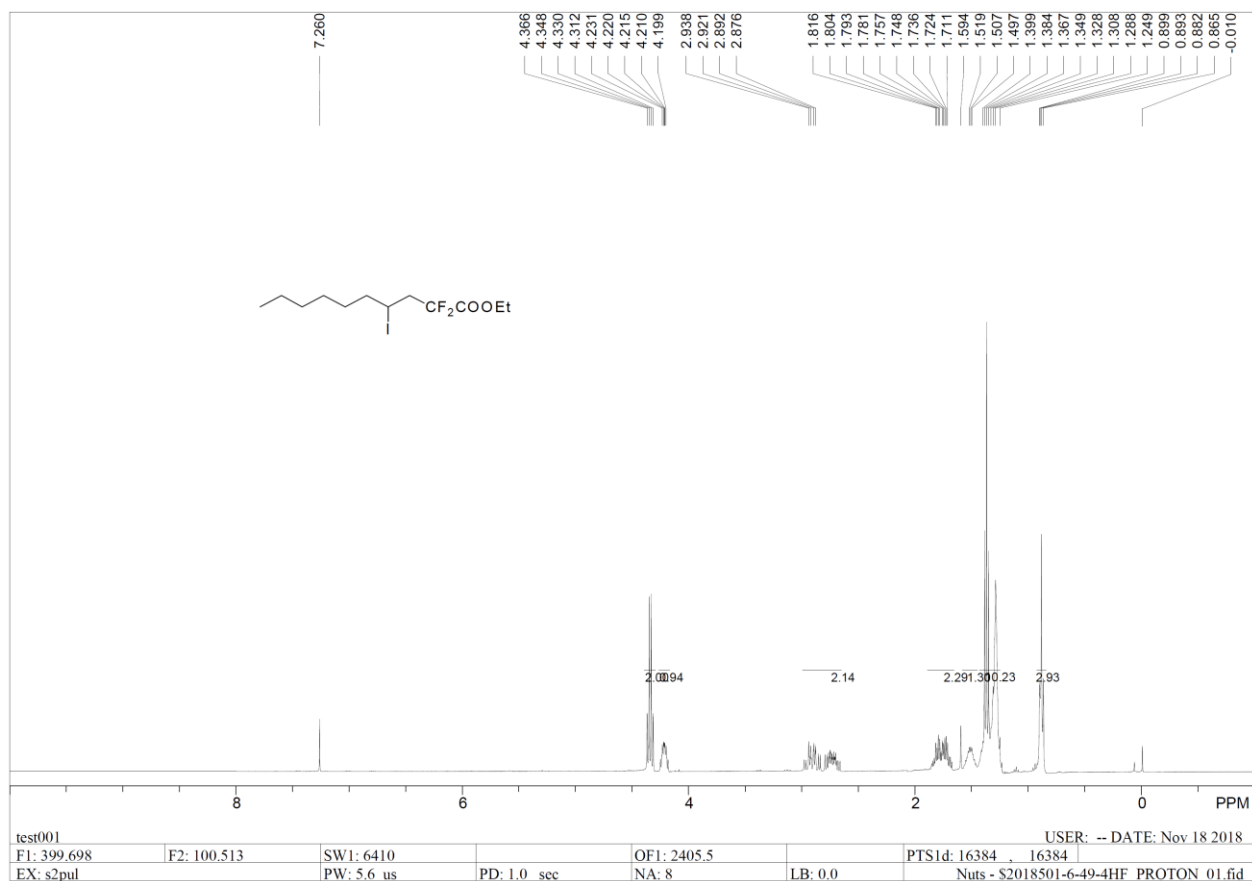

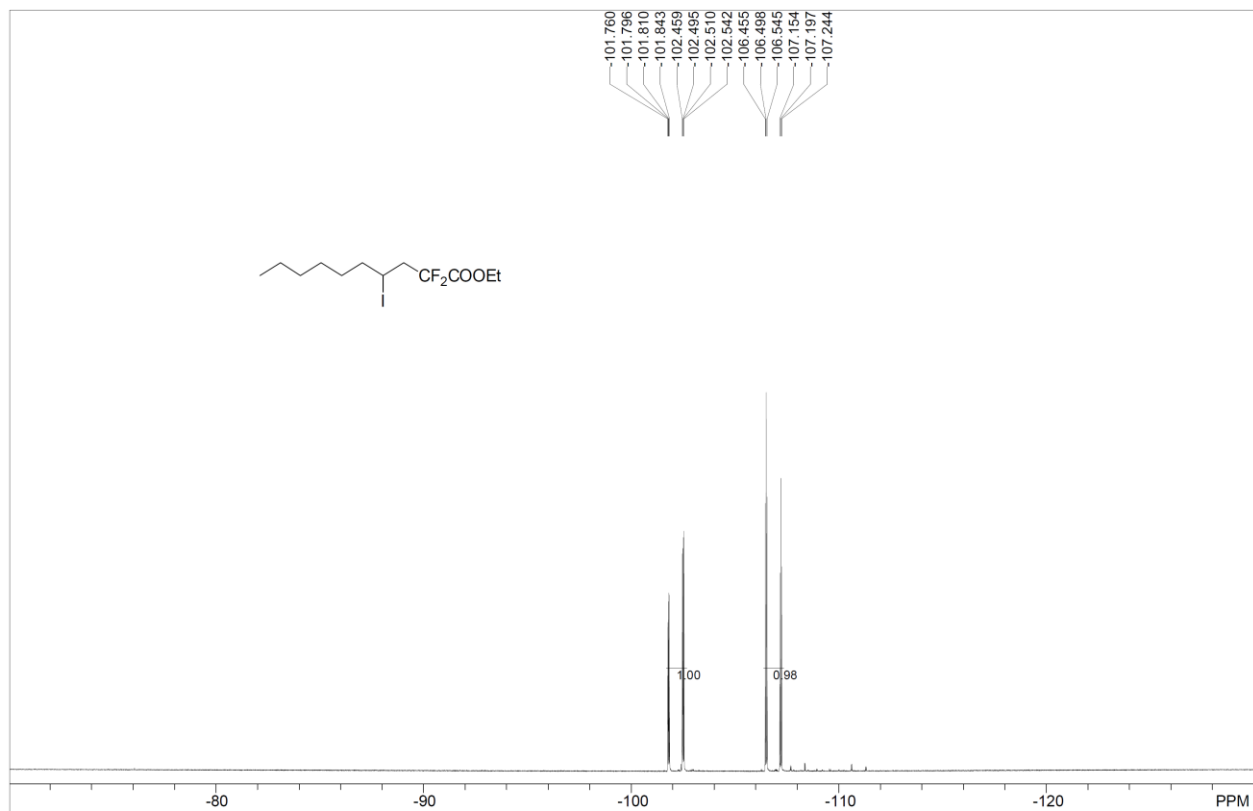

test001  
 F1: 376.057 F2: 100.513 SW1: 89286 OF1: -31967.5 PTS1d: 65536 65536 USER: -- DATE: Nov 18 2018  
 EX: s2pul PW: 5.1 us PD: 1.0 sec NA: 16 LB: 0.0 Nuts - S2018501-6-49-4HF\_FLUORINE\_01.fid

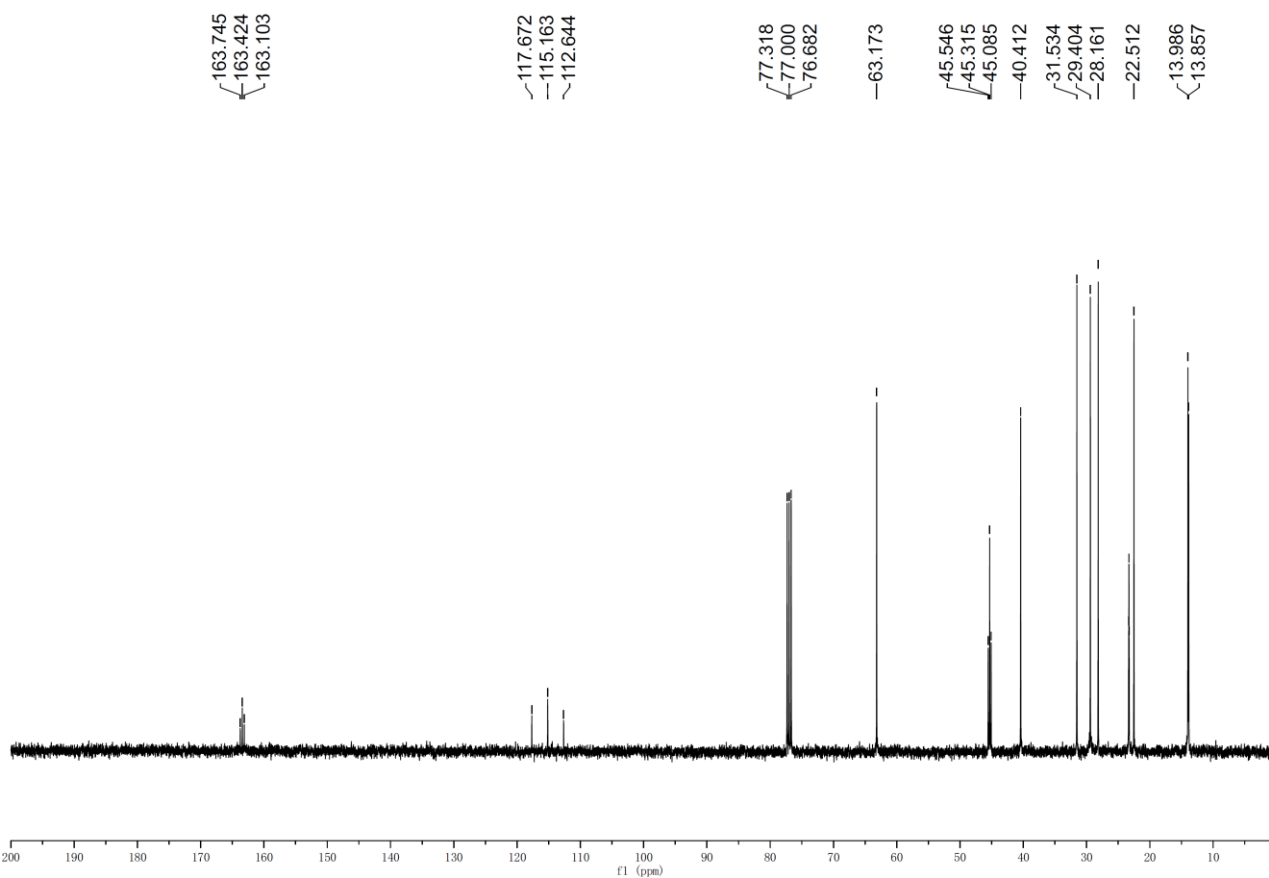

**Ethyl 8-bromo-2,2-difluoro-4-iodooctanoate (3e).**

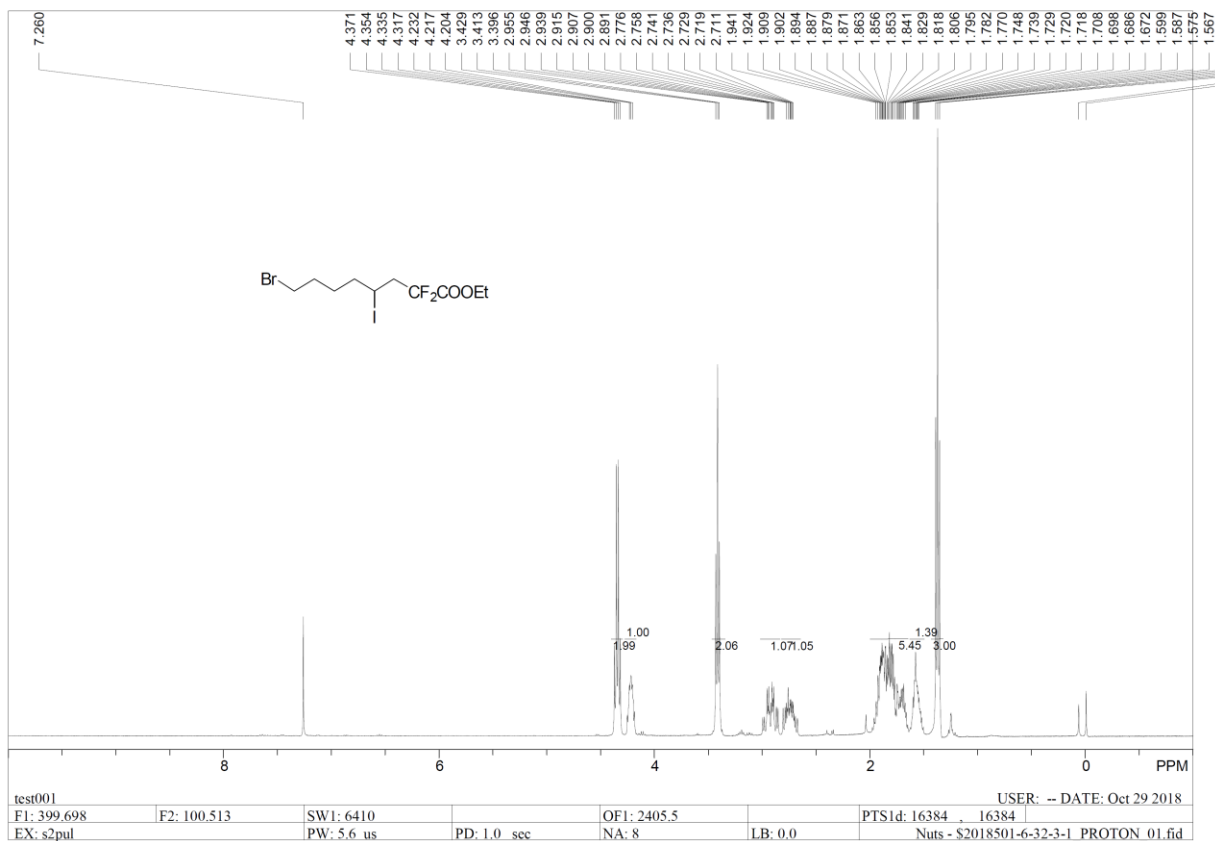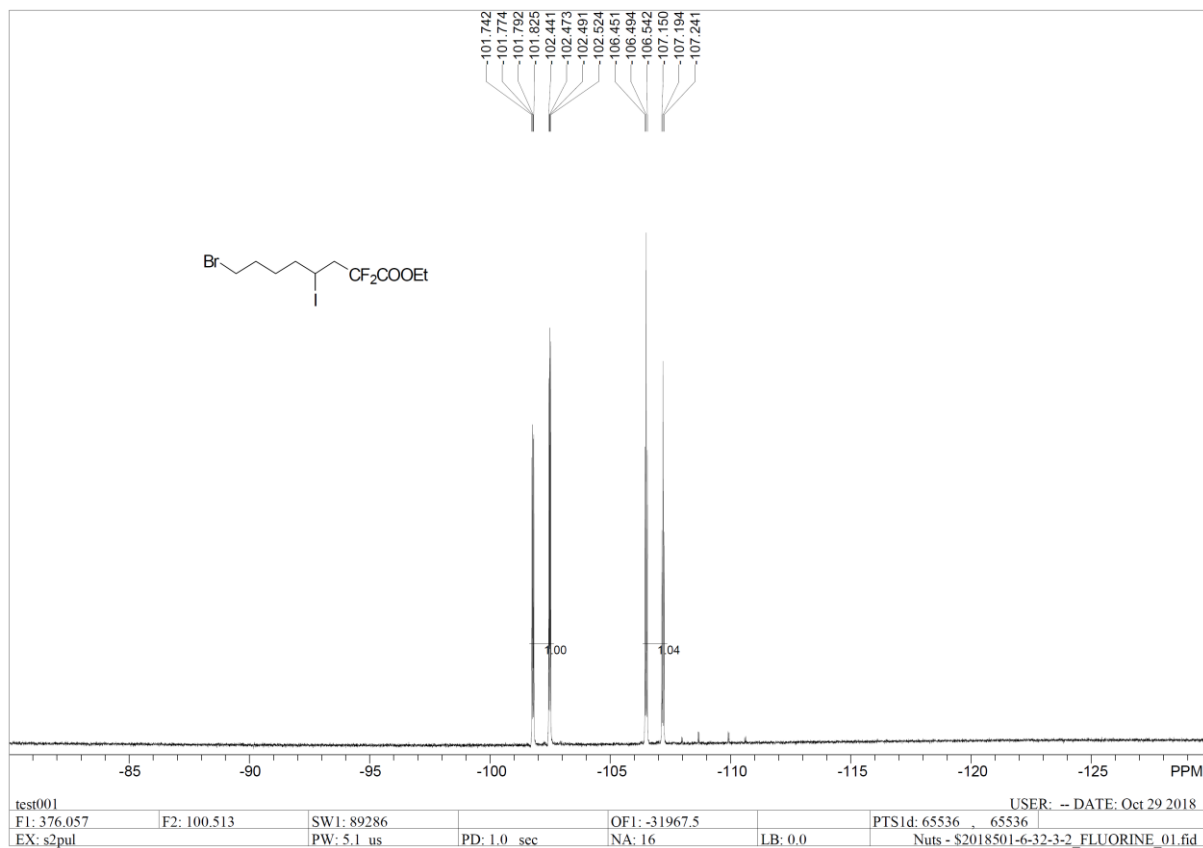

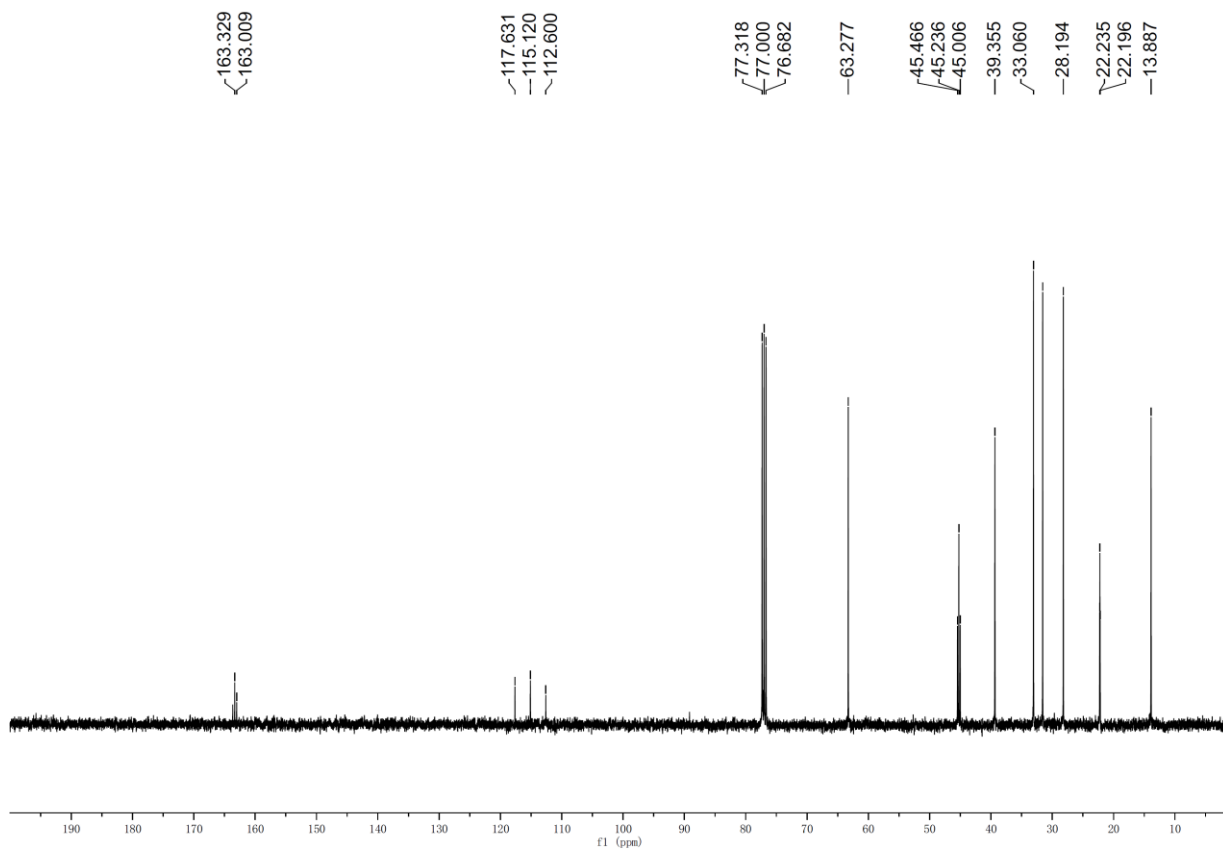

**Ethyl 2,2-difluoro-6-hydroxy-4-iodohexanoate (3f).**

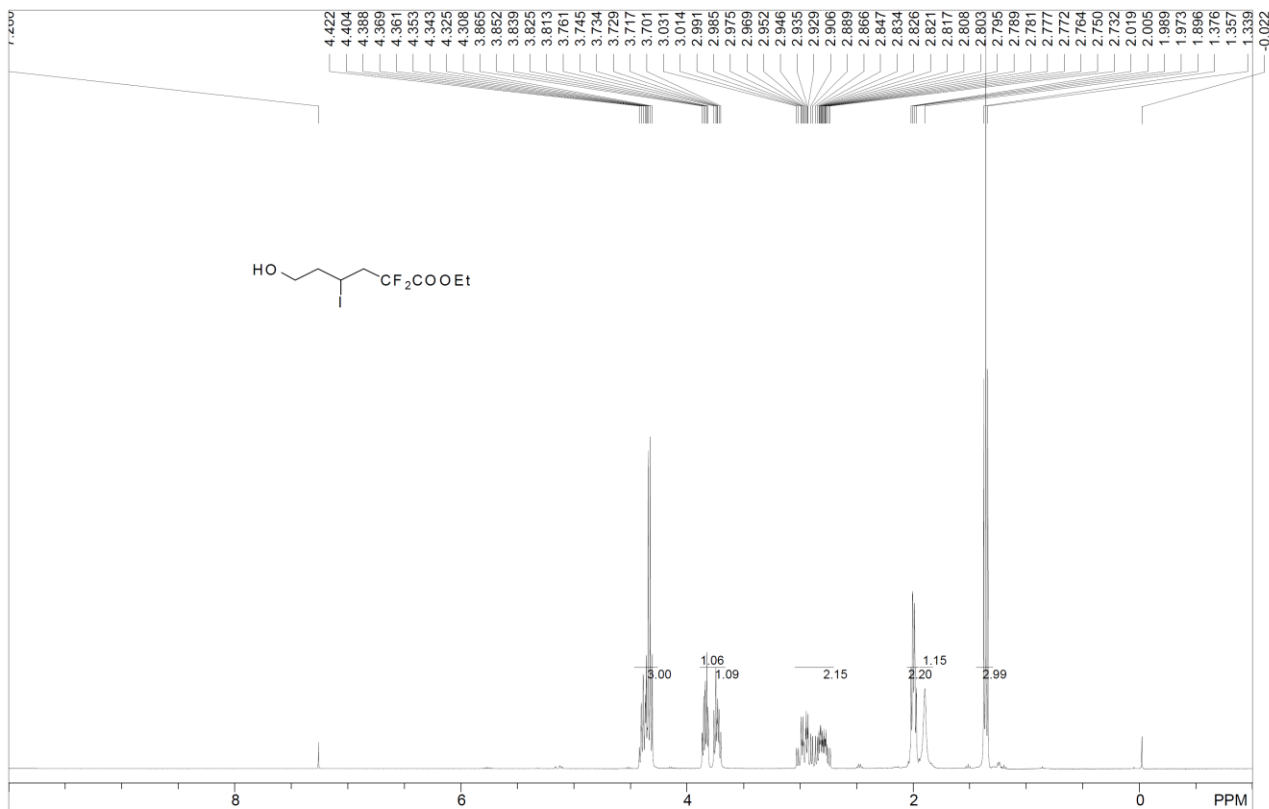

|             |             |             |             |              |                                       |                            |
|-------------|-------------|-------------|-------------|--------------|---------------------------------------|----------------------------|
| test001     |             |             |             |              |                                       | USER: -- DATE: Oct 29 2018 |
| F1: 399.698 | F2: 100.513 | SW1: 6410   | OF1: 2405.5 | PTS1d: 16384 | 16384                                 |                            |
| EX: s2pul   | PW: 5.6 us  | PD: 1.0 sec | NA: 8       | LB: 0.0      | Nuts - \$2018501-6-35-1_PROTON_01.fid |                            |

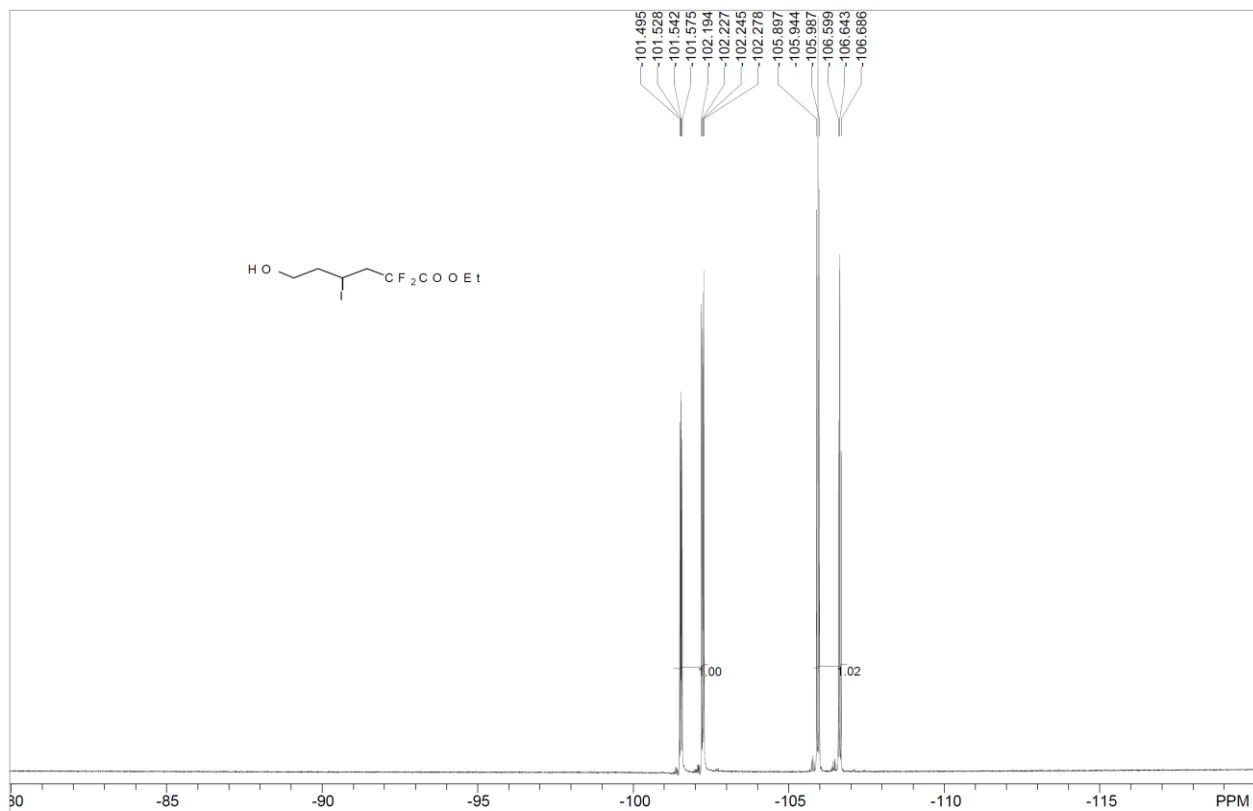

test001 USER: -- DATE: Oct 29 2018  
 F1: 376.057 F2: 100.513 SW1: 89286 OF1: -31967.5 PTS1d: 65536 65536  
 EX: s2pul PW: 5.1 us PD: 1.0 sec NA: 16 LB: 0.0 Nuts - S2018501-6-35-1\_FLUORINE\_01.fid

163.753  
 163.432  
 163.110

117.637  
 115.116  
 112.607

77.319  
 77.000  
 76.682

63.304  
 62.280

45.641  
 45.410  
 45.180  
 42.390

19.010  
 18.970  
 18.929  
 13.830

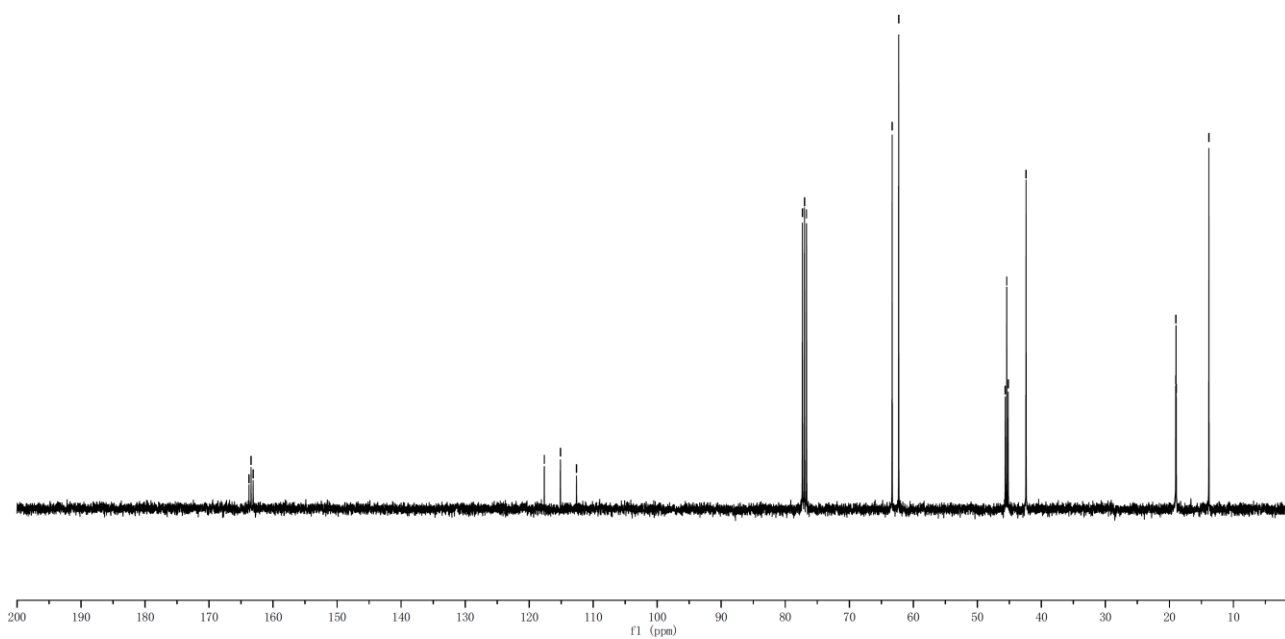

**5-Ethoxy-4,4-difluoro-2-iodo-5-oxopentyl picolinate (3g).**

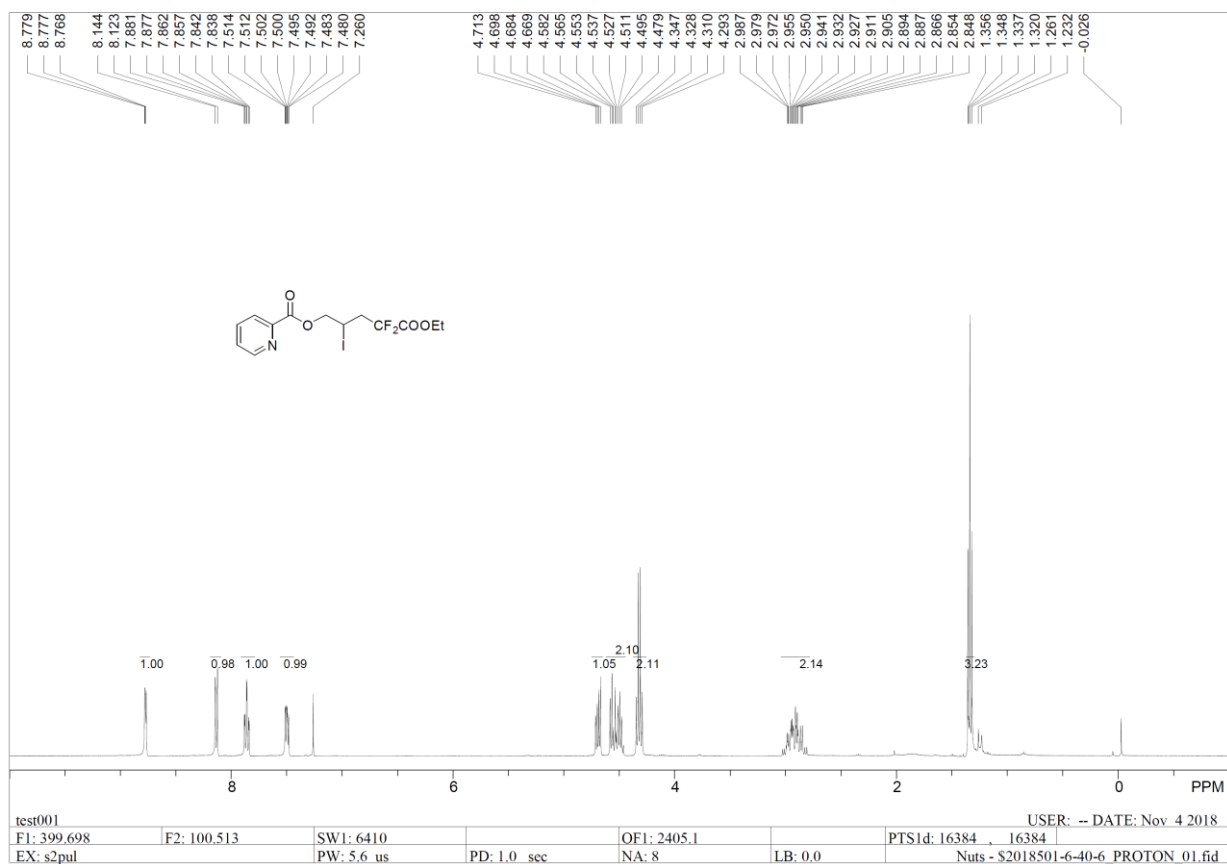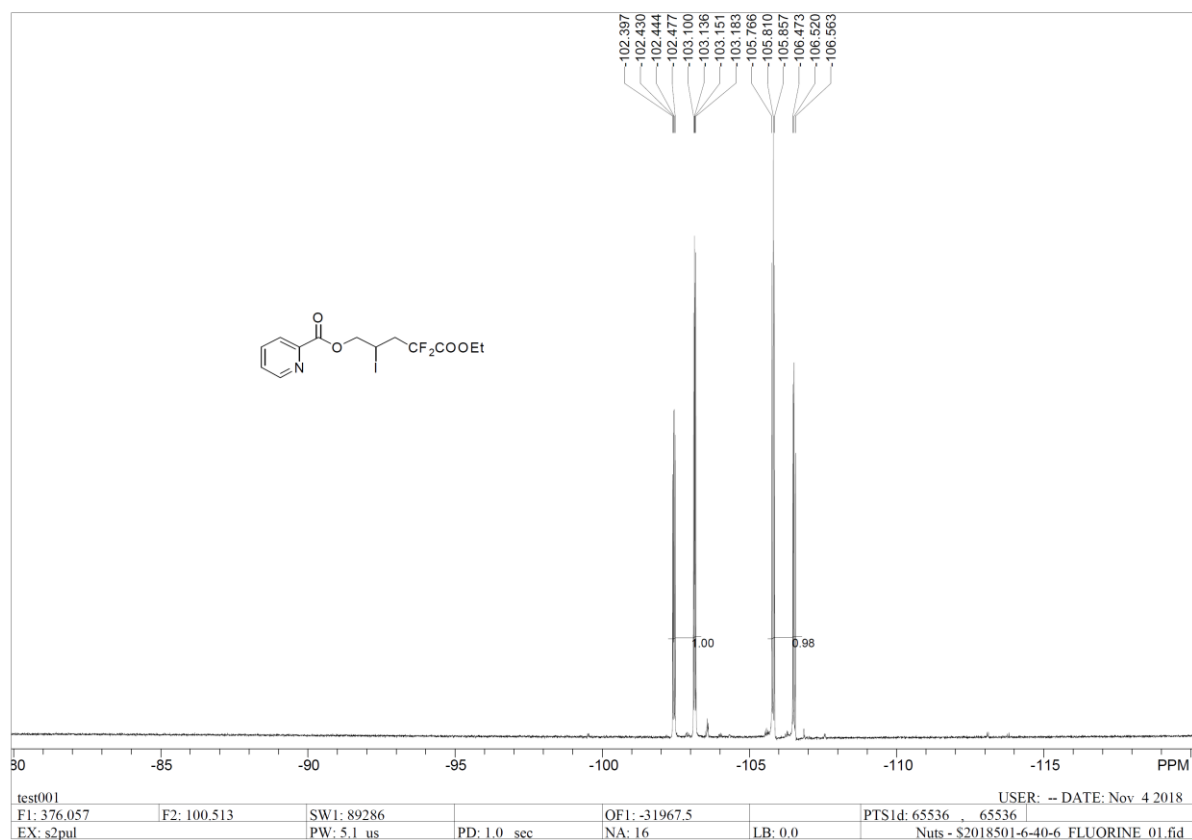

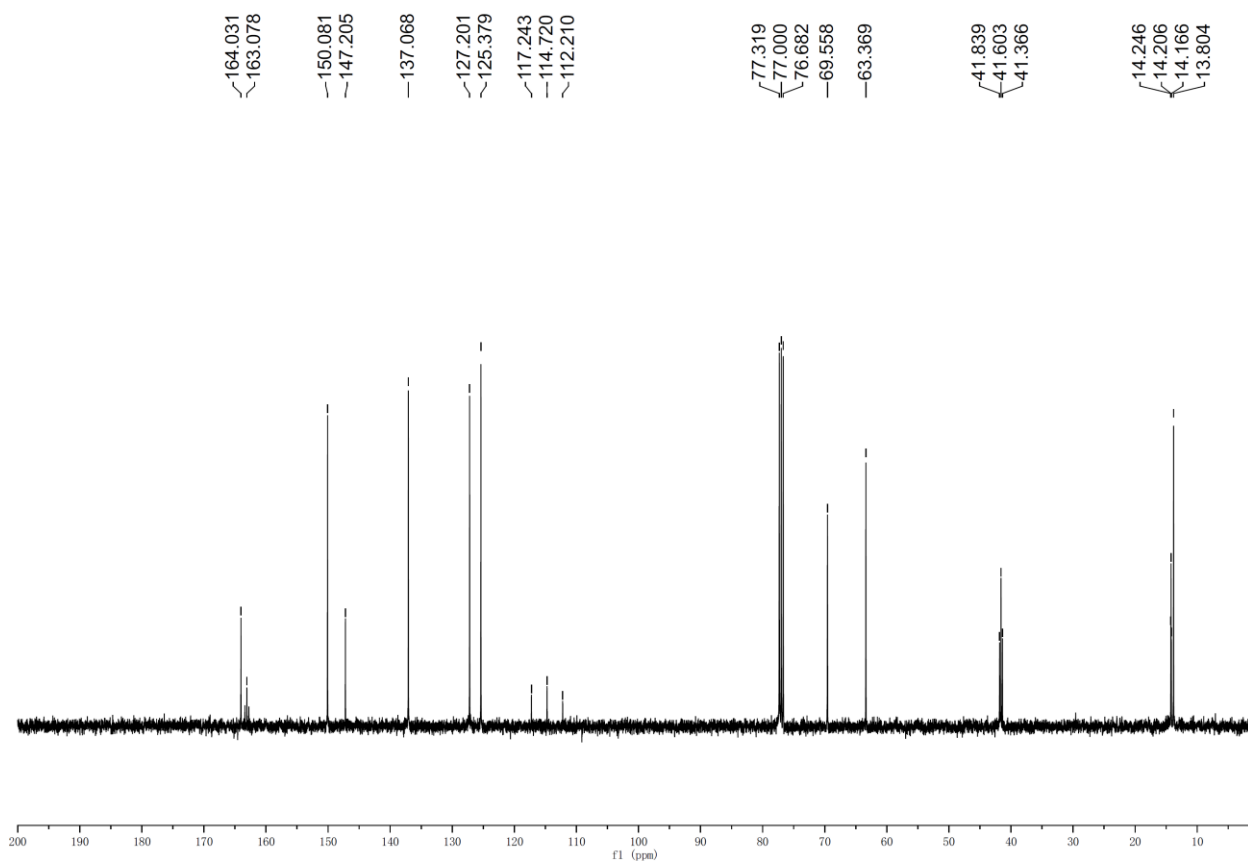

**6-Ethoxy-5,5-difluoro-3-iodo-6-oxohexyl benzoate (3h).**

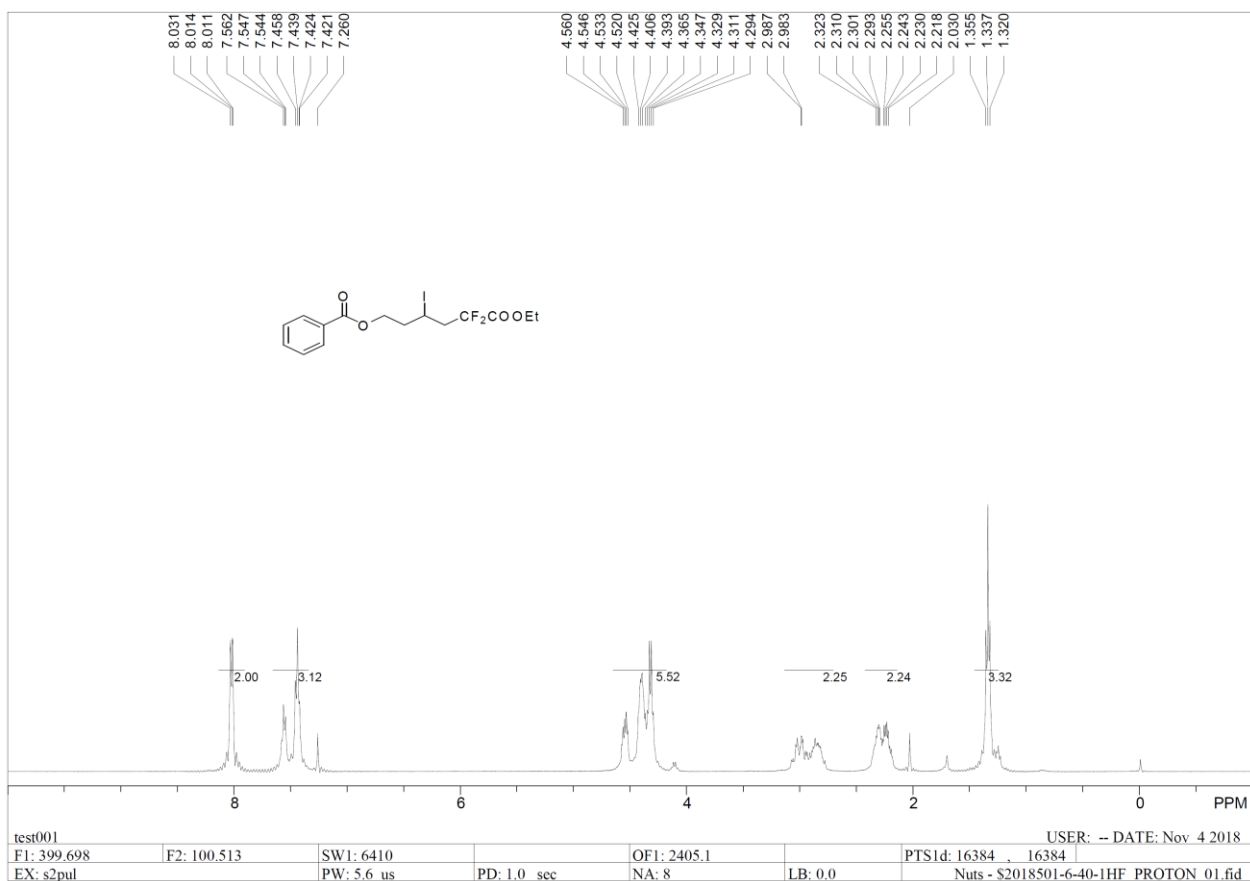

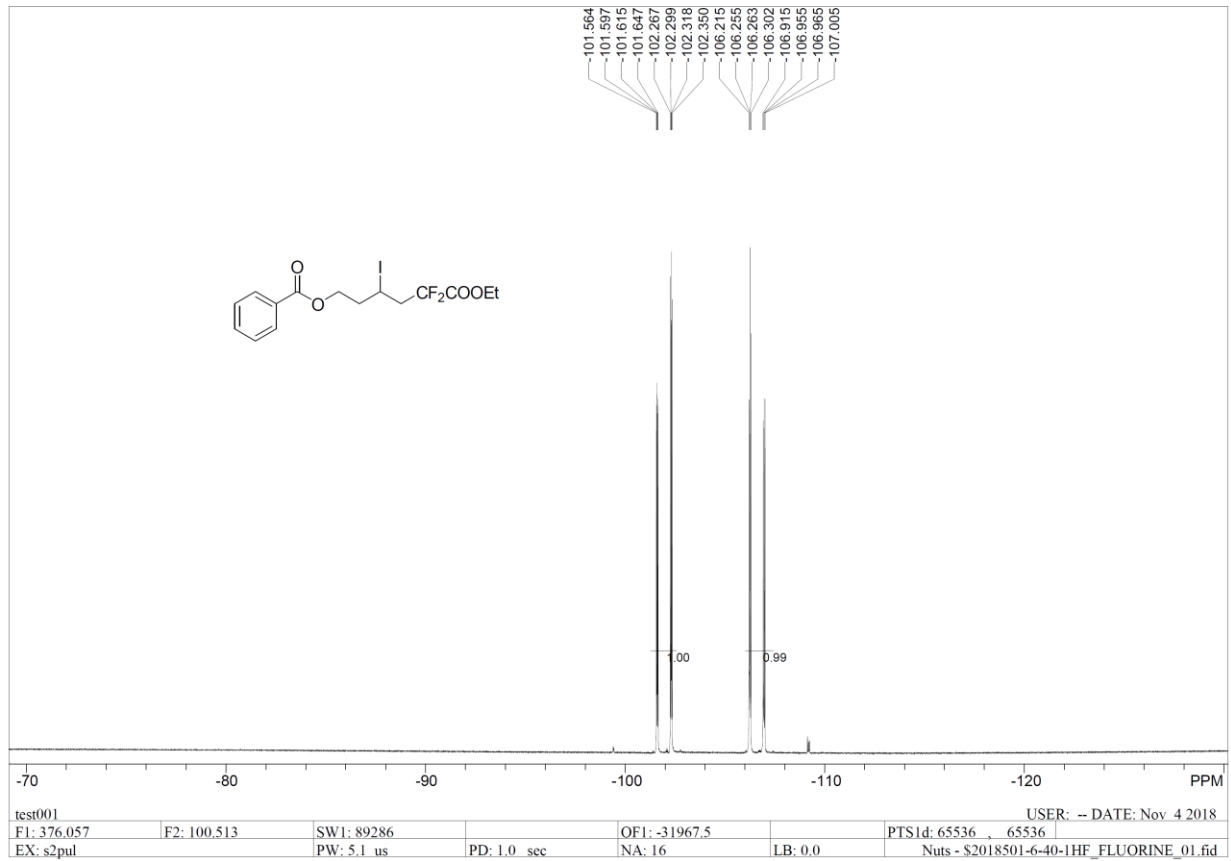

Chemical shifts (PPM): 166.098, 163.450, 163.131, 162.809, 133.016, 129.755, 129.474, 128.323, 117.527, 115.010, 112.492, 77.318, 77.000, 76.681, 64.392, 63.229, 45.495, 45.265, 45.035, 38.927, 17.439, 17.400, 17.361, 14.099, 13.772

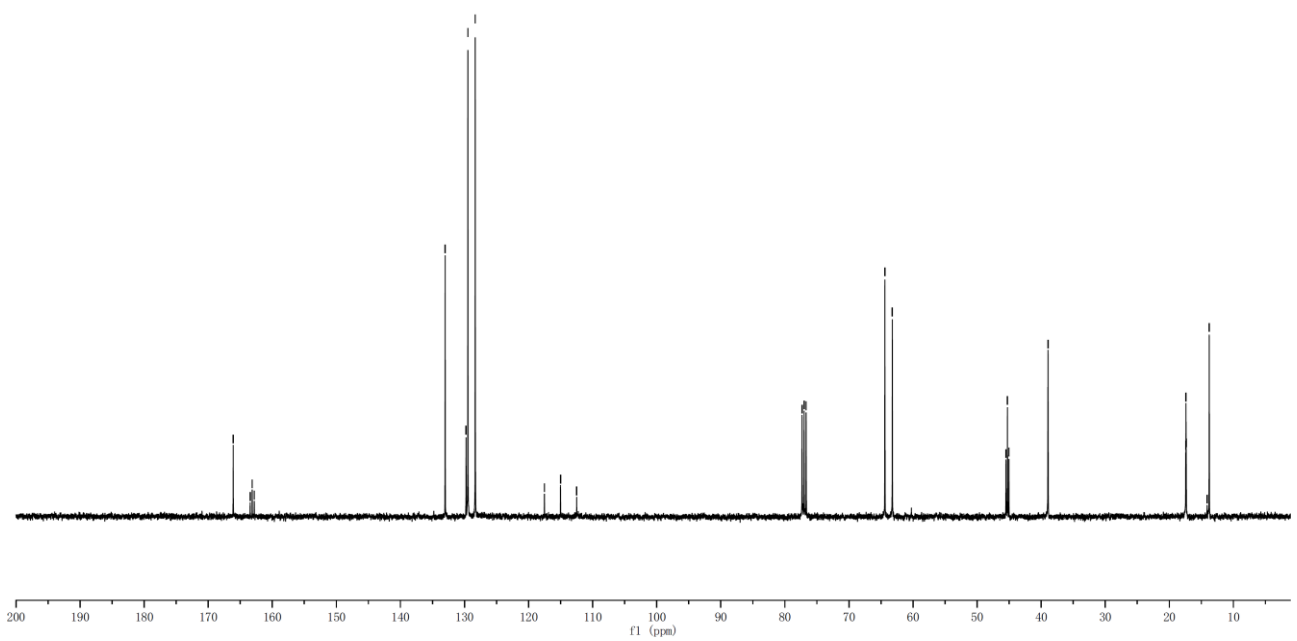



**Ethyl 5-acetoxy-2,2-difluoro-4-iodopentanoate (3i).**

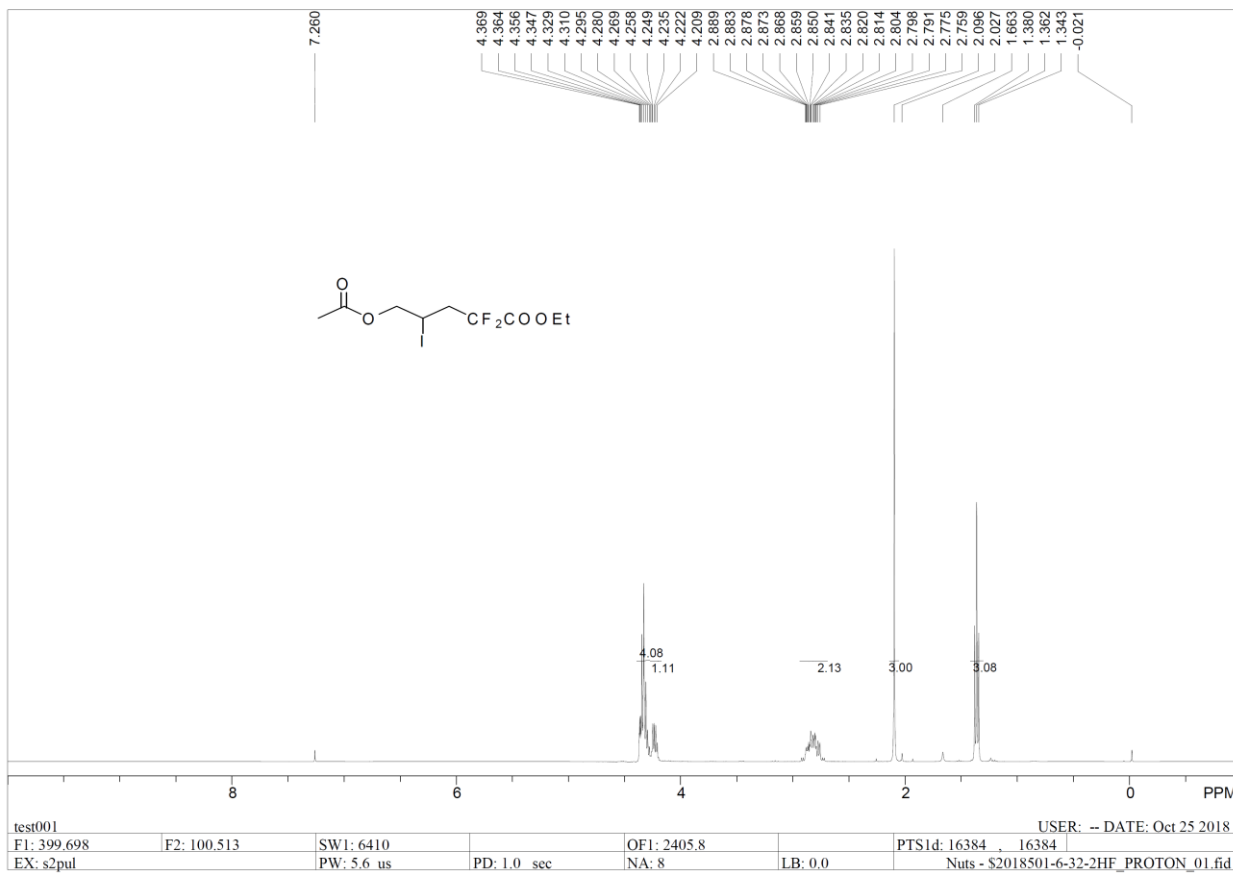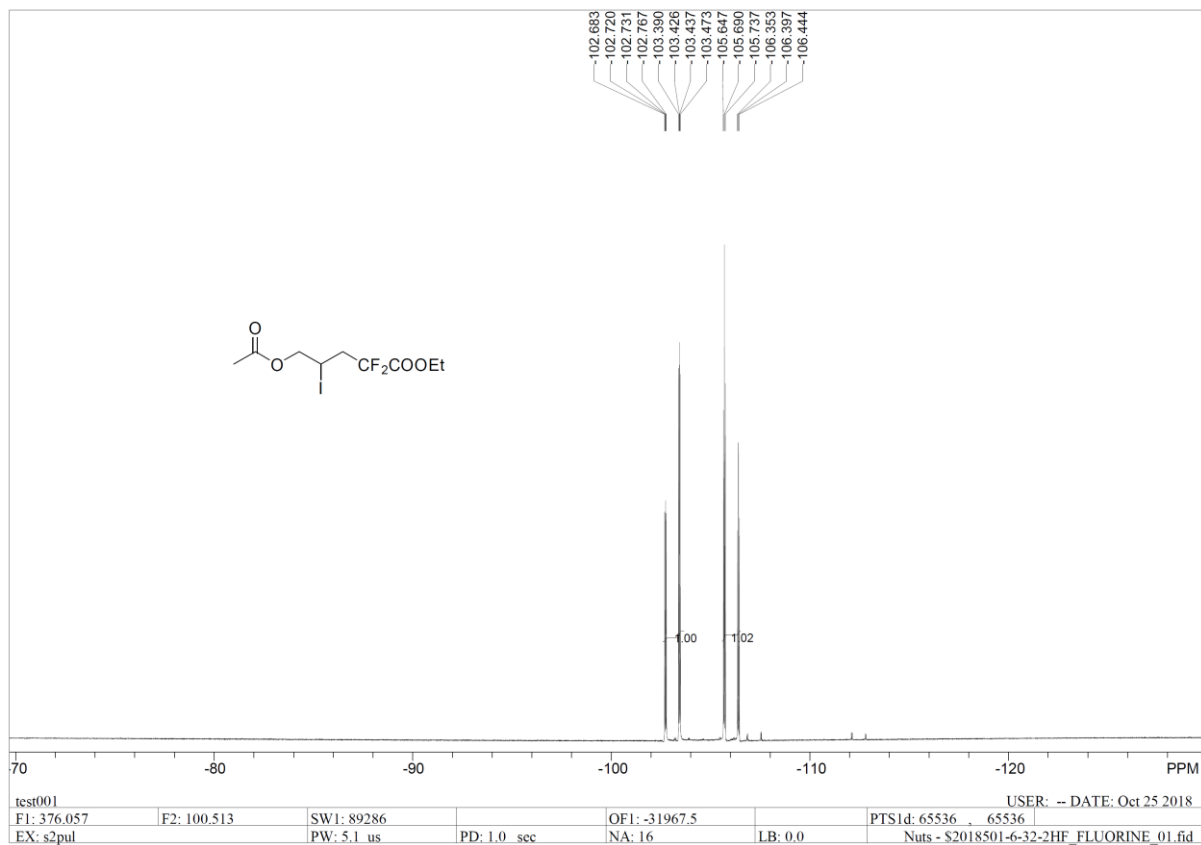

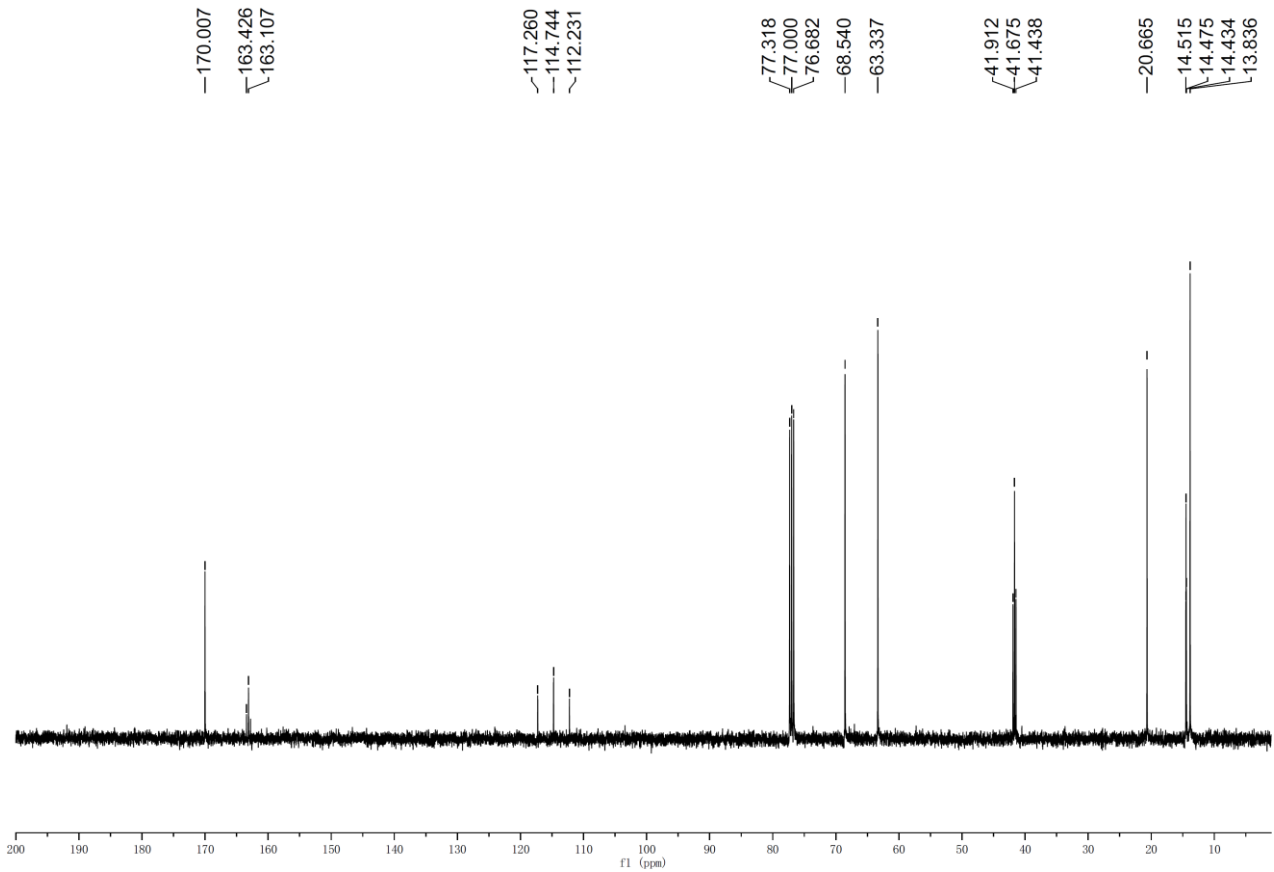

**Ethyl 5-((tert-butoxycarbonyl)amino)-2,2-difluoro-4-iodopentanoate (3j).**

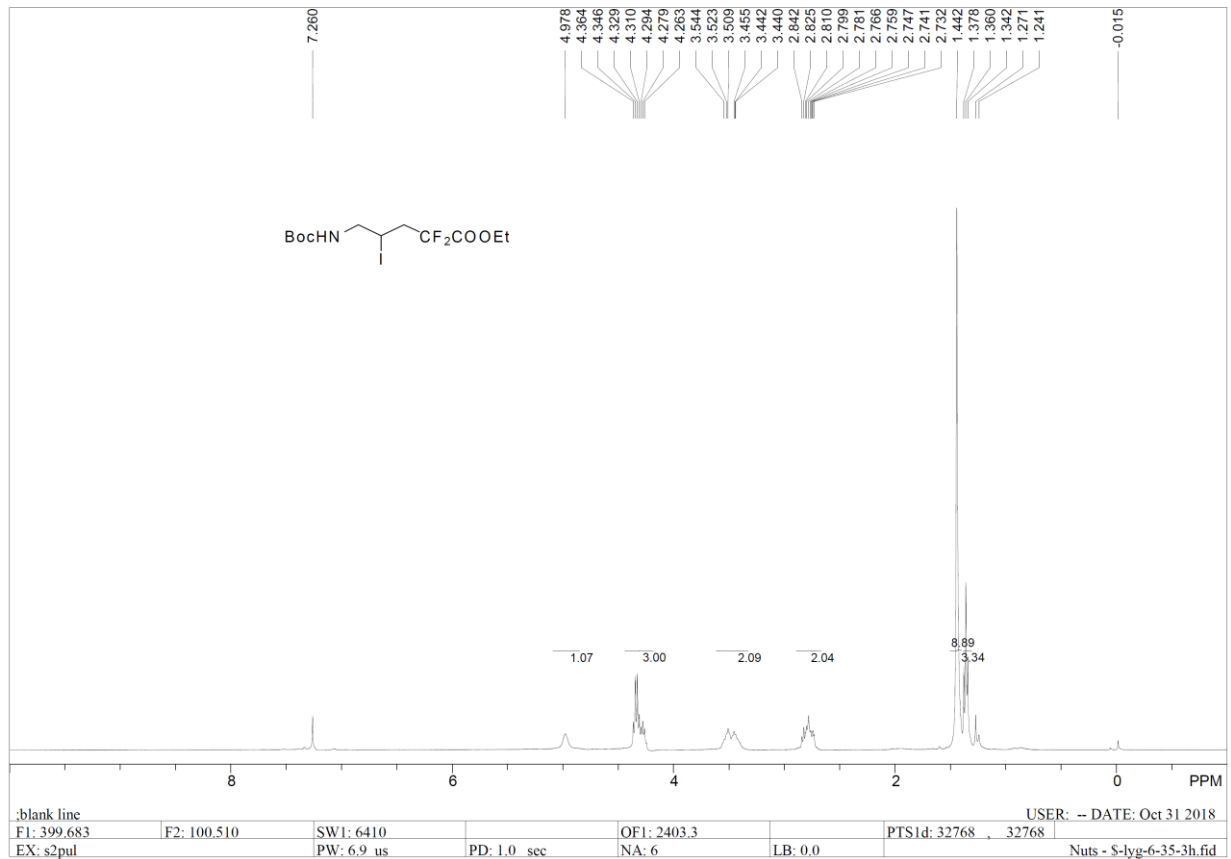

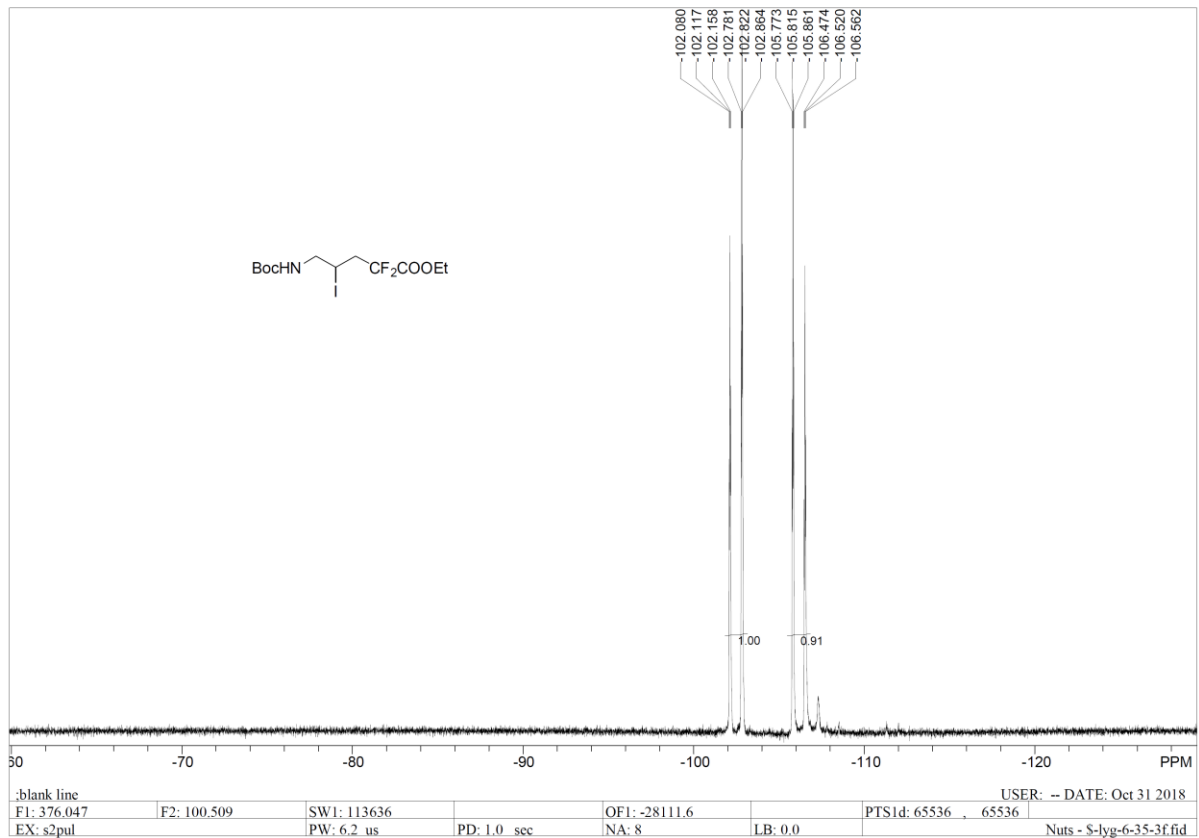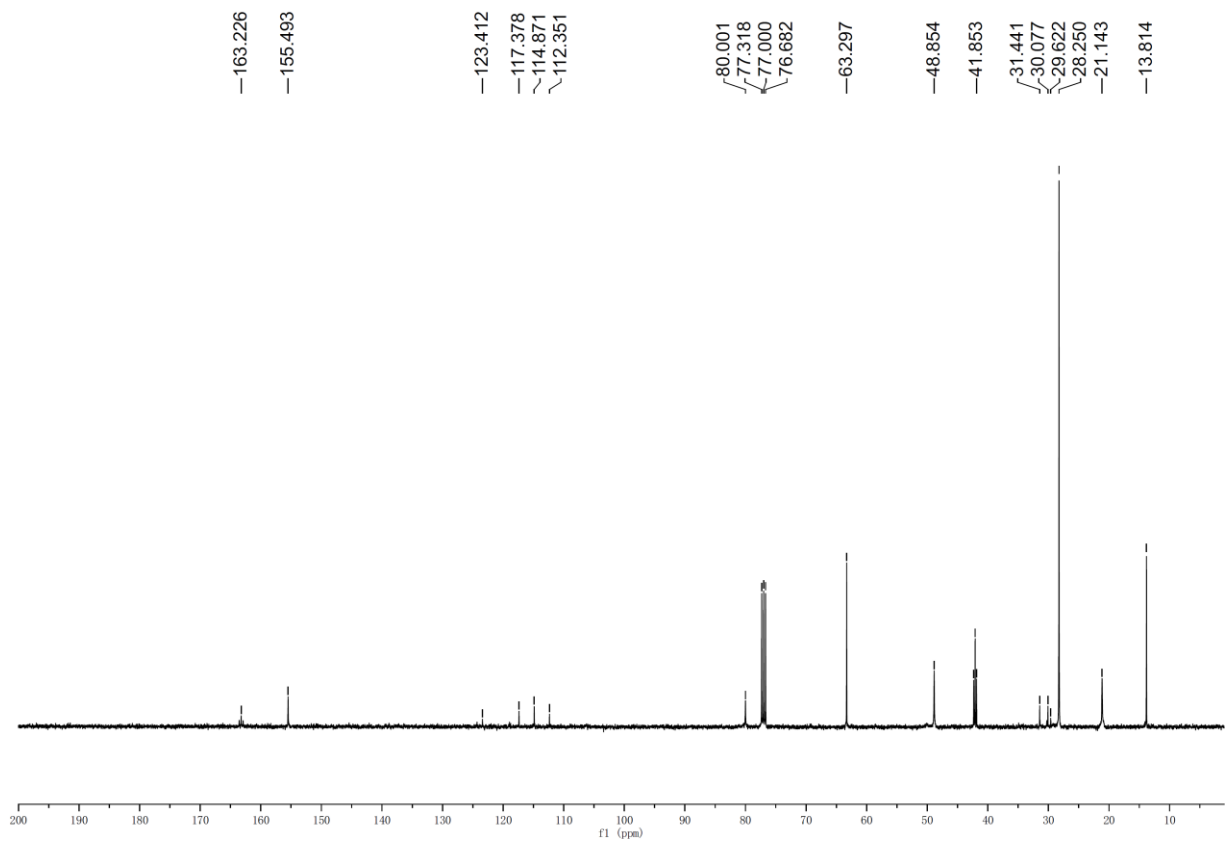

**Ethyl 2,2-difluoro-4-iodo-5-(2,2,2-trifluoroacetamido)pentanoate (3k).**

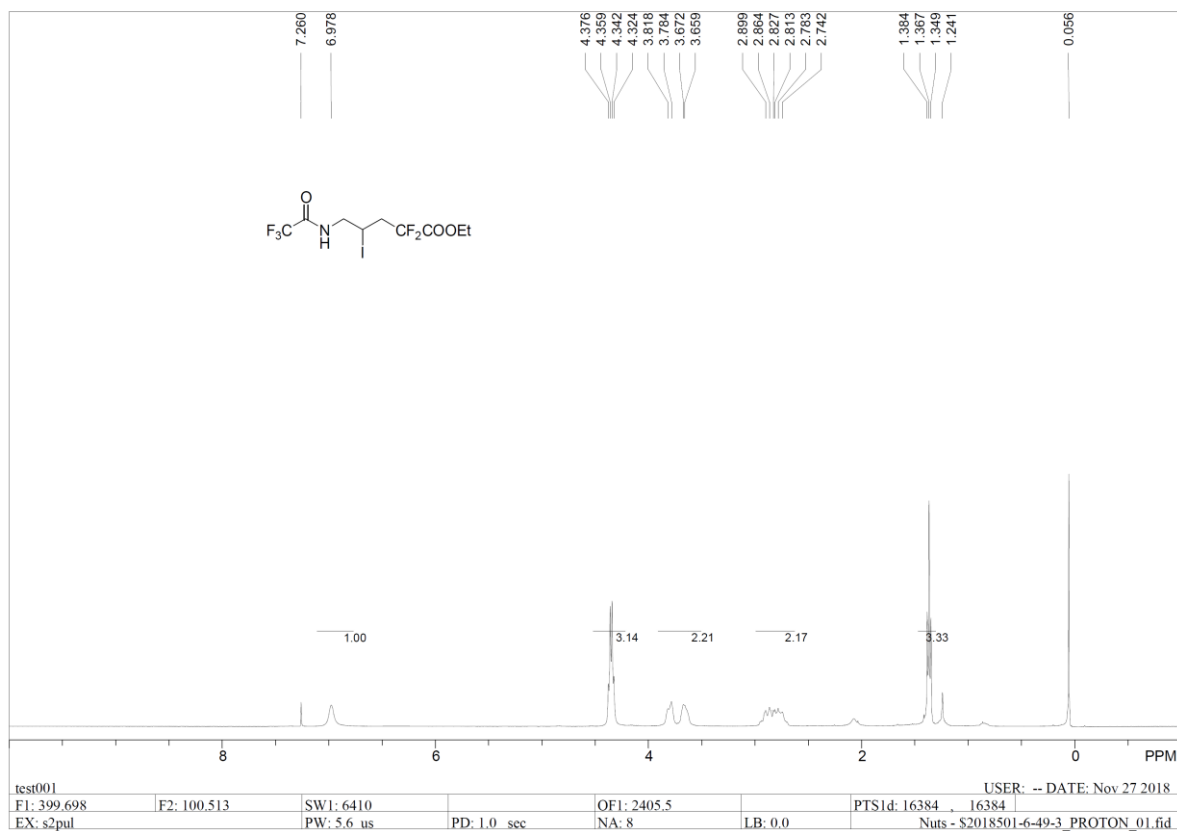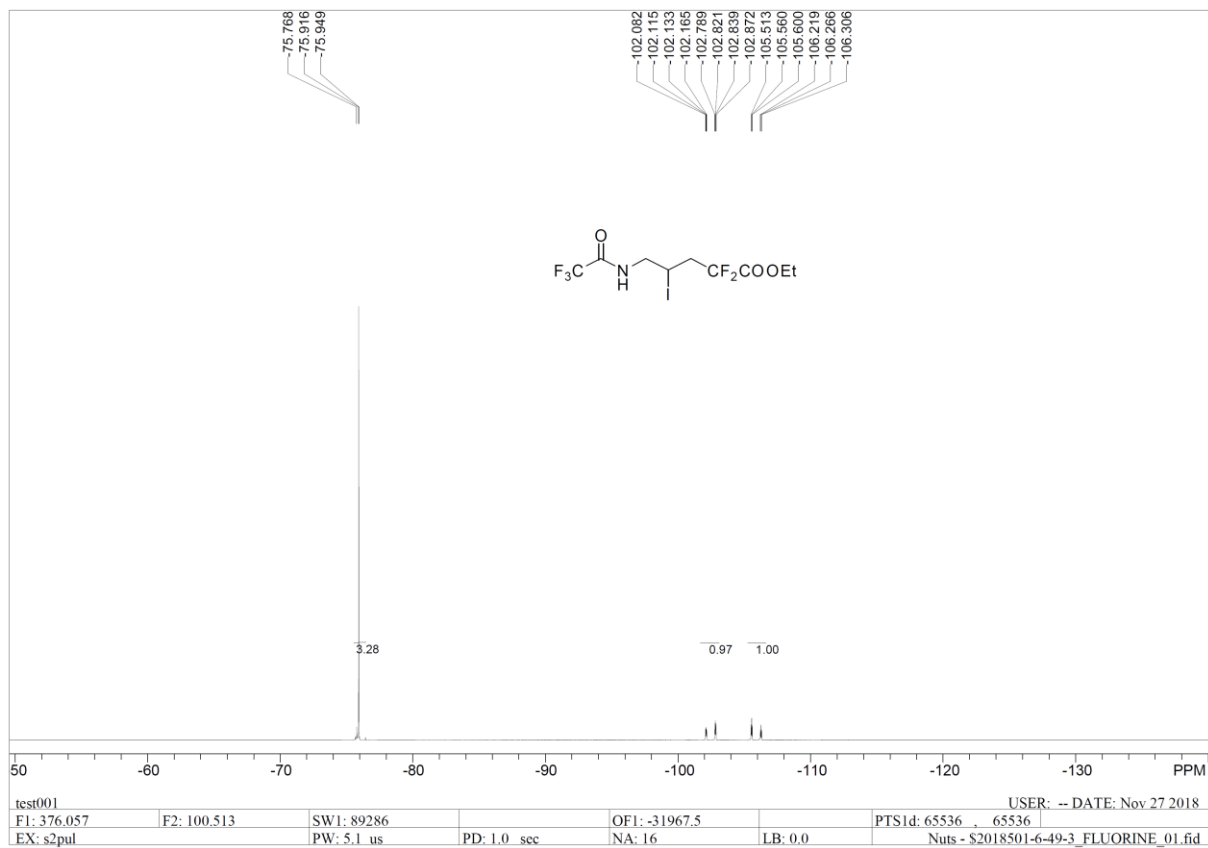

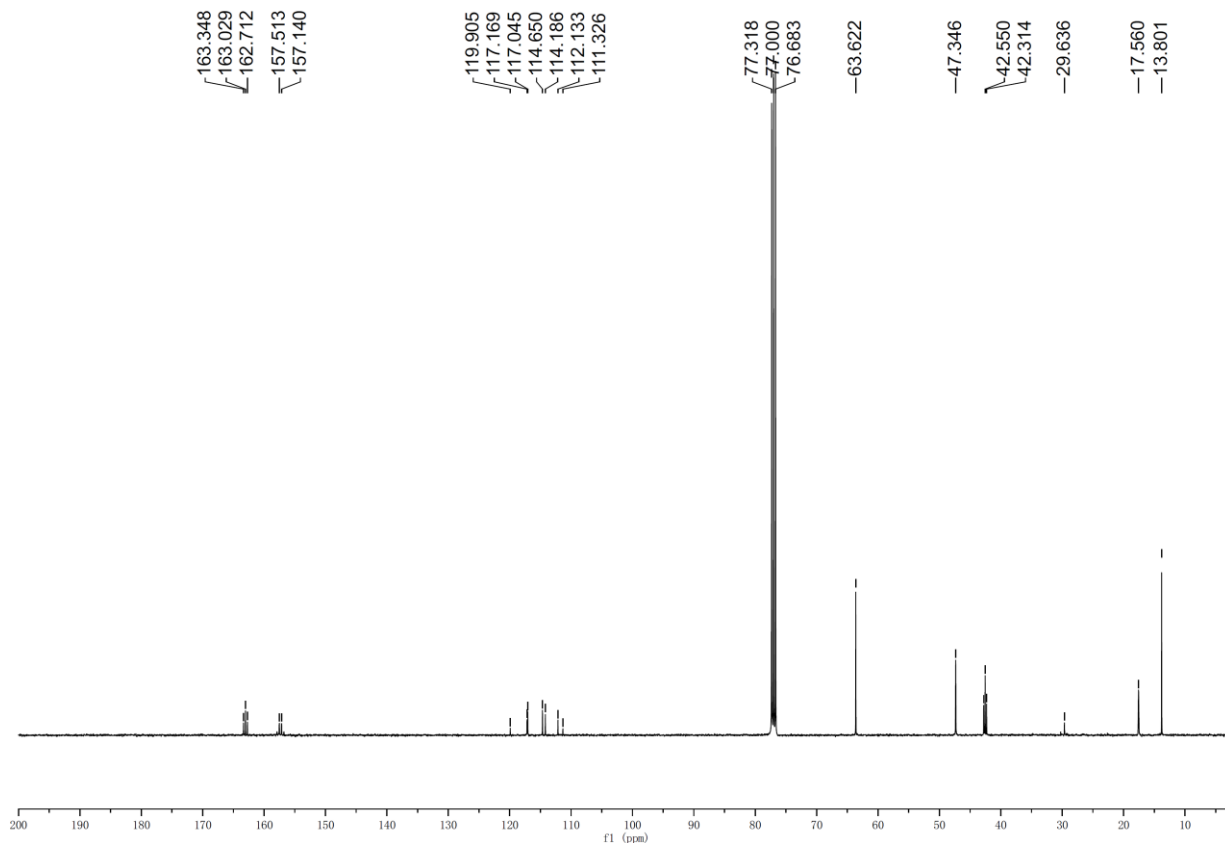

**(4,4,5,5,6,6,7,7,7-Nonafluoro-2-iodoheptyl)benzene (3l).**

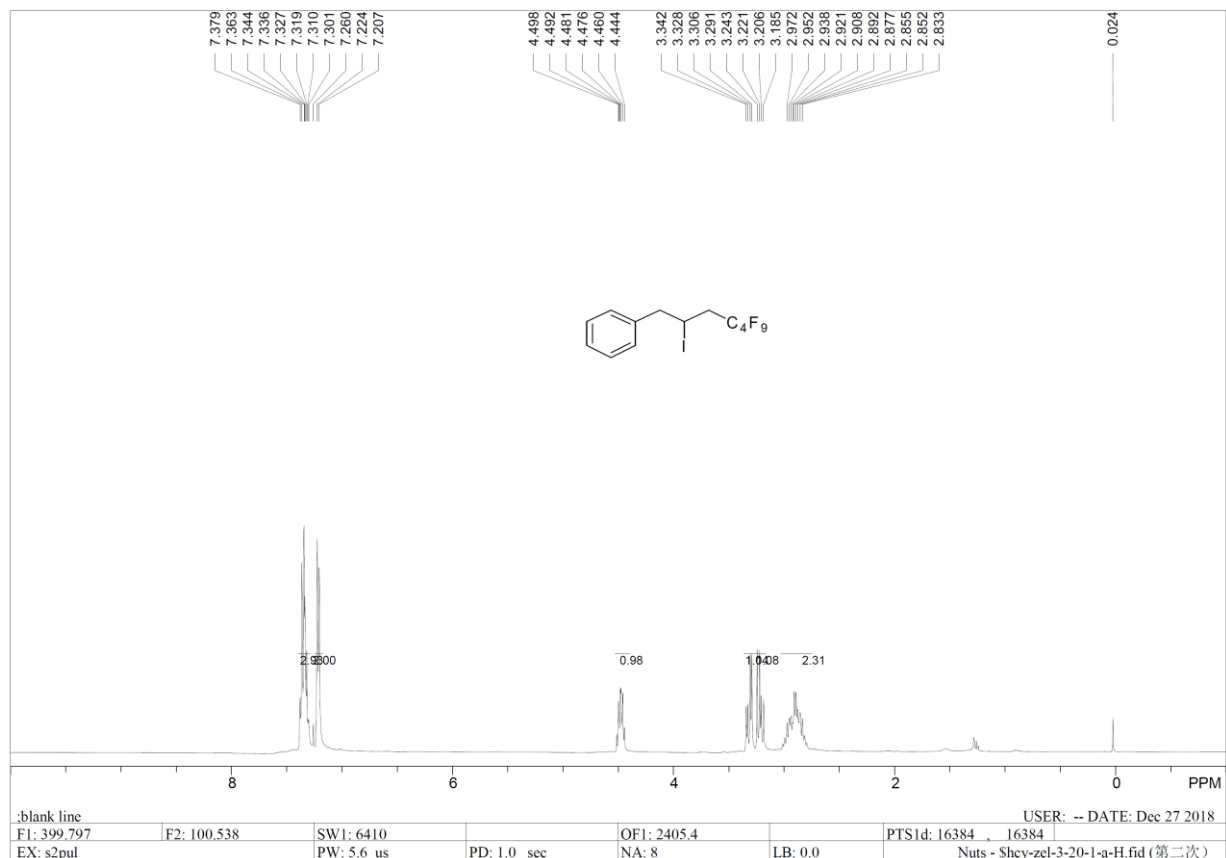

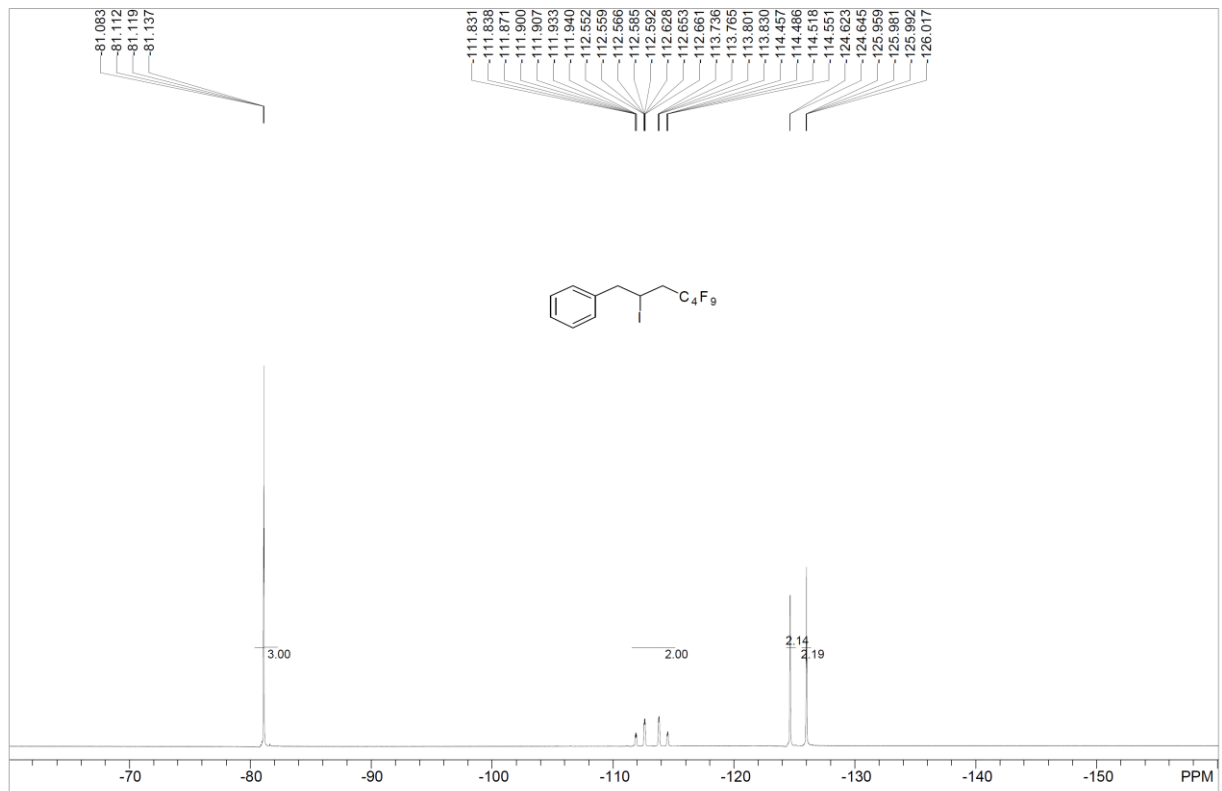

STANDARD FLUORINE PARAMETERS  
 F1: 376.151 F2: 100.538 SW1: 89286 OF1: -31975.5 PTS1d: 65536 , 65536 USER: -- DATE: Dec 28 2018  
 EX: s2pul PW: 3.2 us PD: 1.0 sec NA: 4 LB: 0.0 Nuts - Shey-zel-3-20-1-a-F.fid

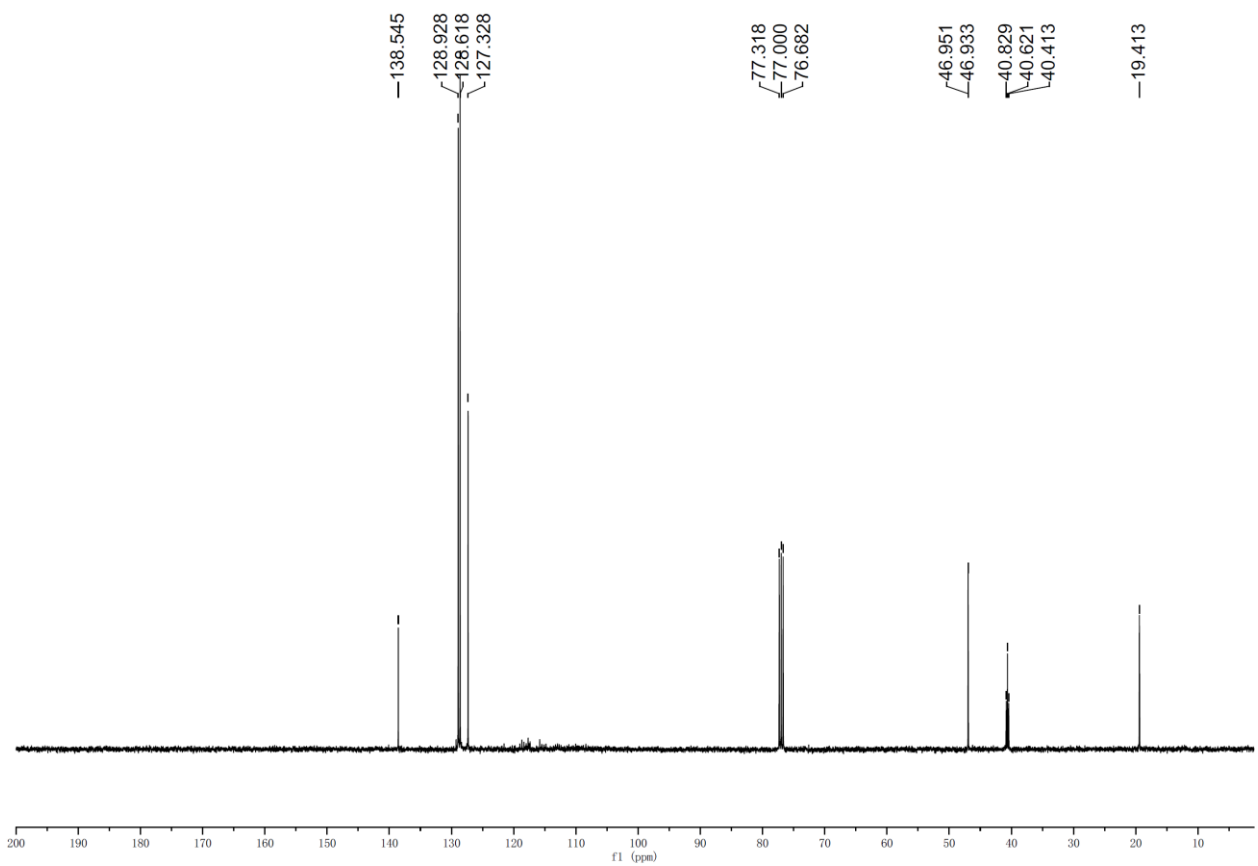

**1,1,1,2,2,3,3,4,4-Nonafluoro-6-iododecane (3m).**

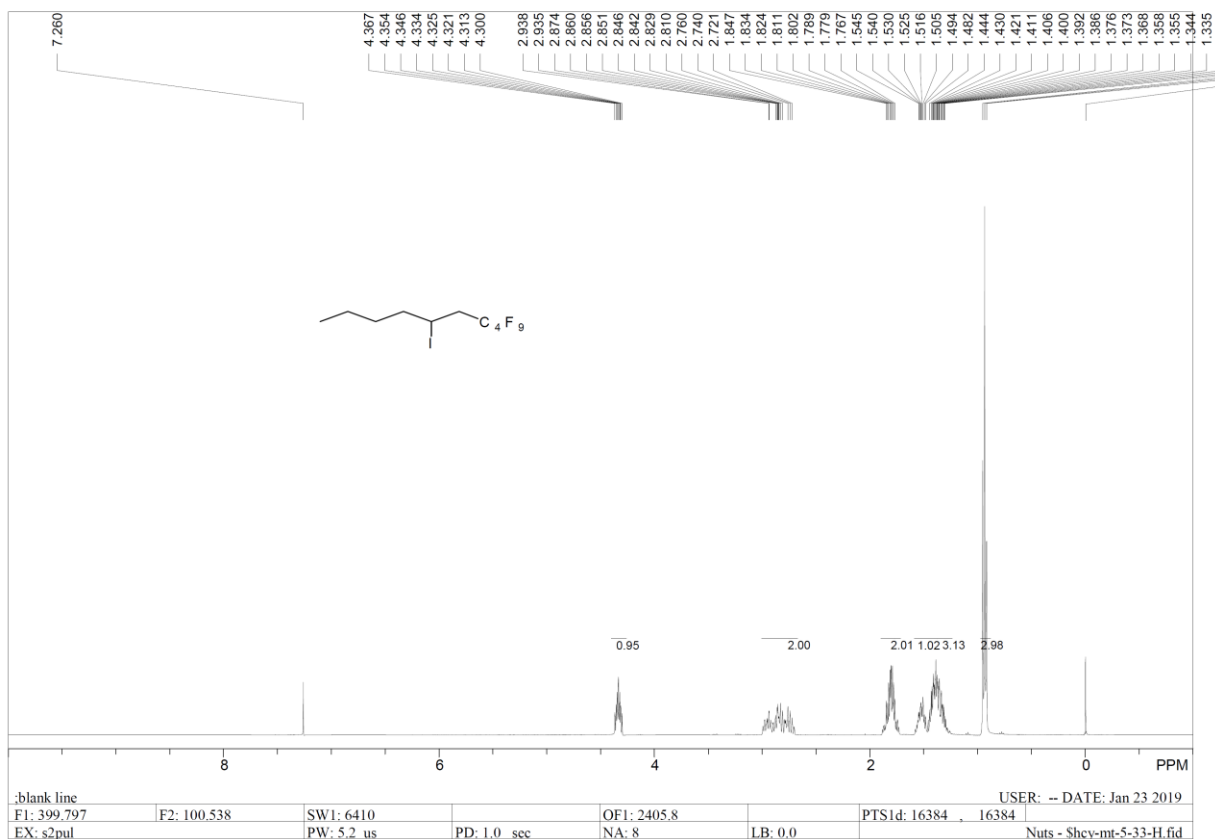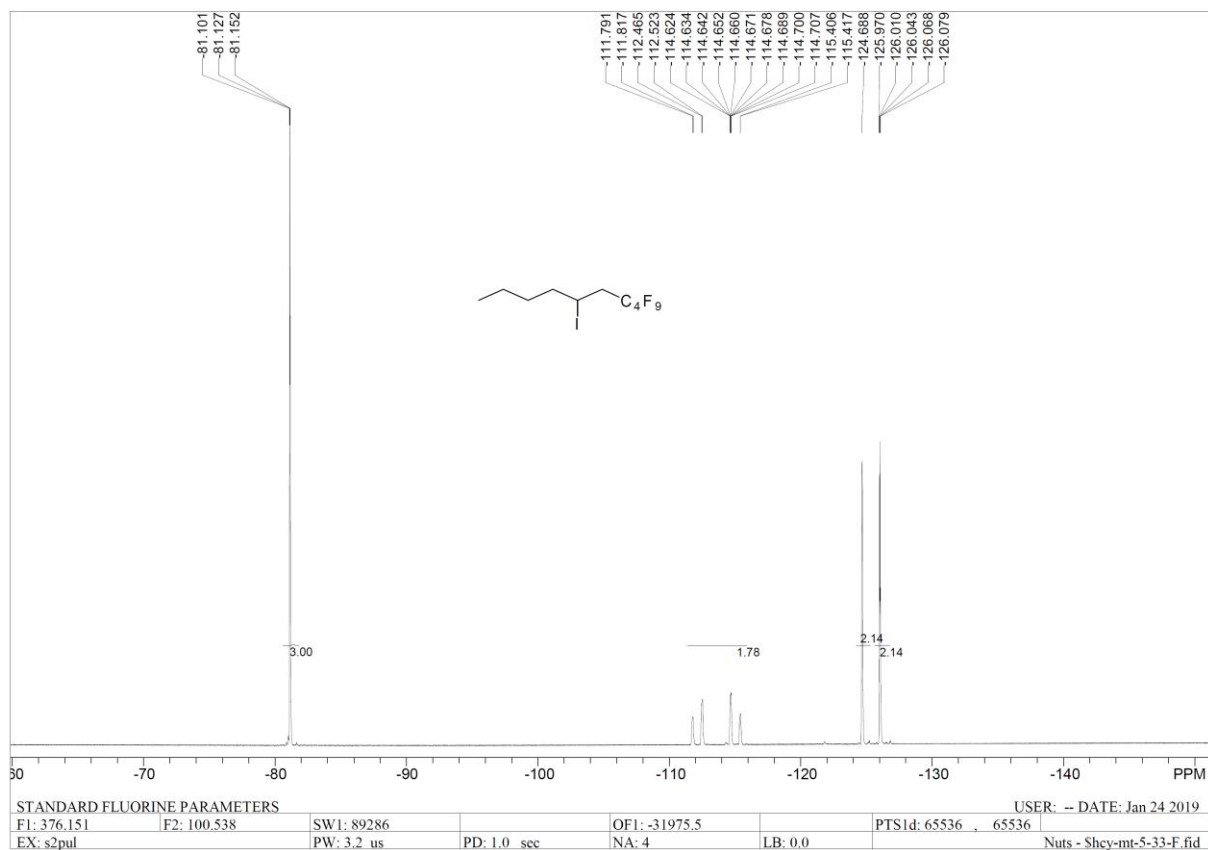

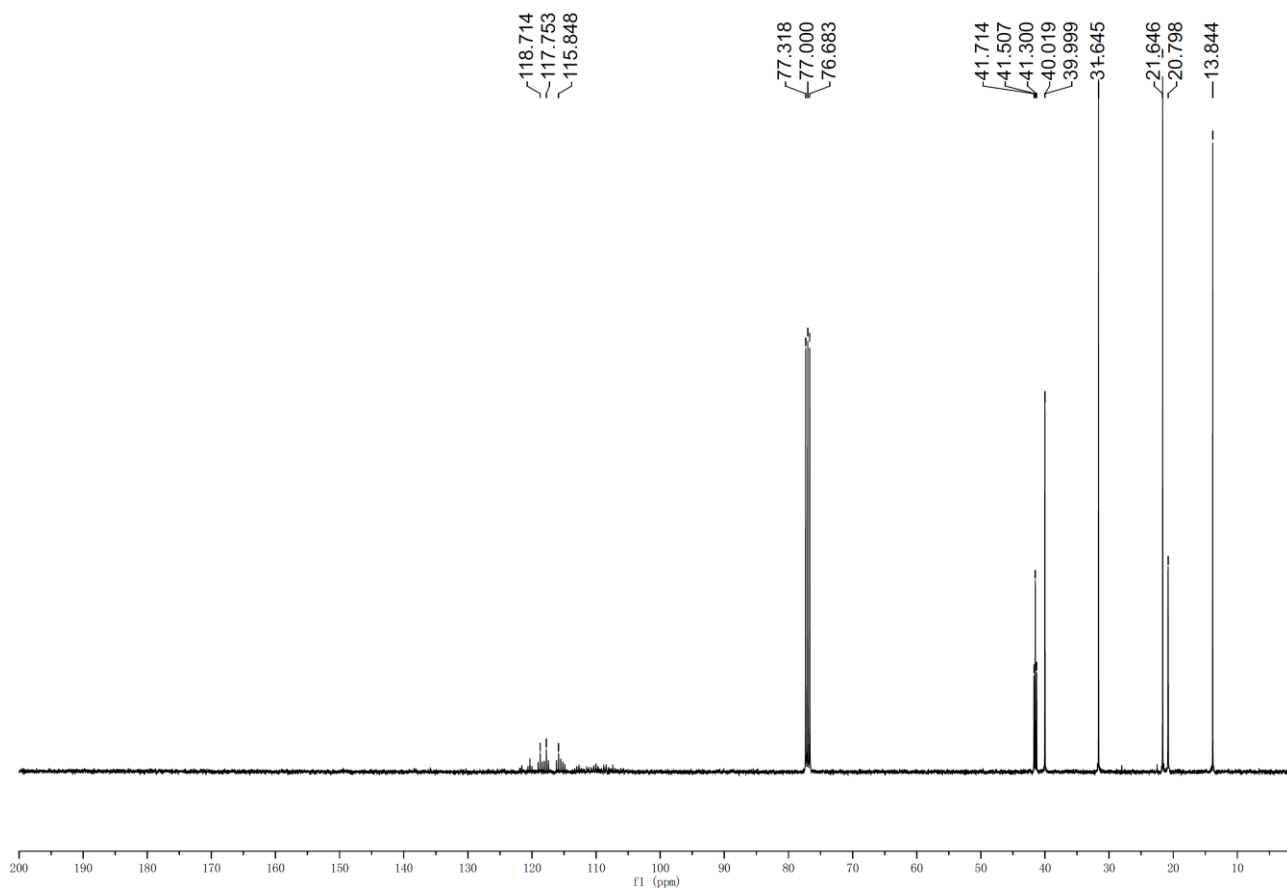

**Tert-butyl (4,4,5,5,6,6,7,7,7-nonafluoro-2-iodoheptyl)carbamate (3n).**

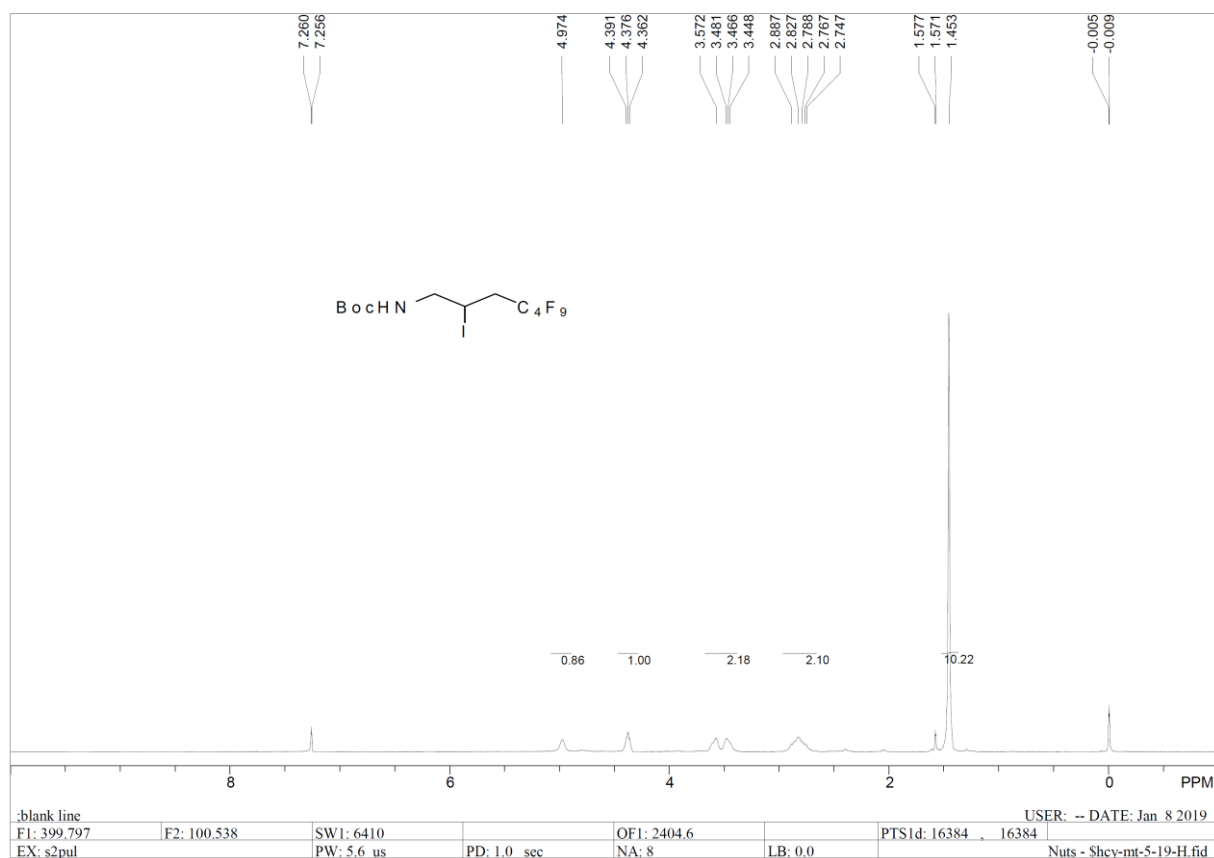



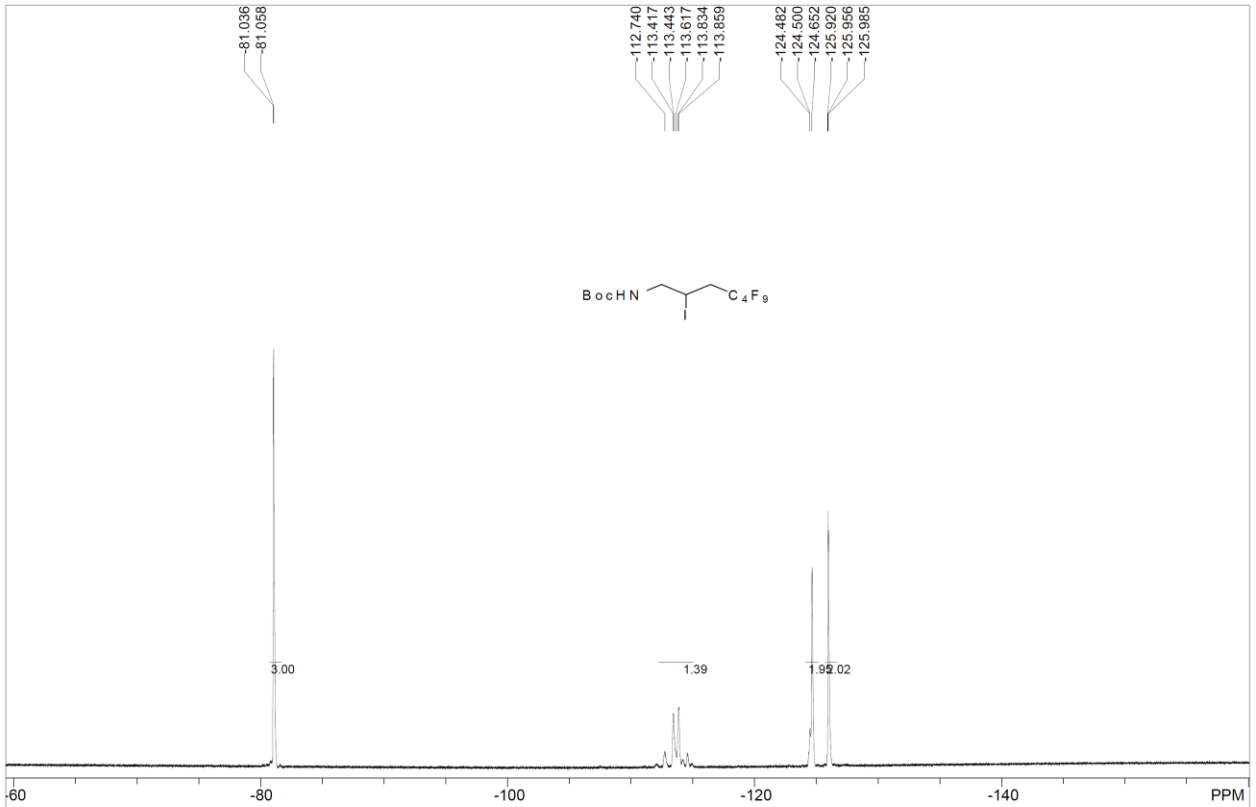

STANDARD FLUORINE PARAMETERS

|             |             |             |               |              |       |                            |
|-------------|-------------|-------------|---------------|--------------|-------|----------------------------|
| F1: 376.151 | F2: 100.538 | SW1: 89286  | OFl: -31975.5 | PTS1d: 65536 | 65536 | USER: -- DATE: Jan 22 2019 |
| EX: s2pul   | PW: 3.2 us  | PD: 1.0 sec | NA: 4         | LB: 0.0      |       | Nuts - Shcy-mt-5-19-F.fid  |

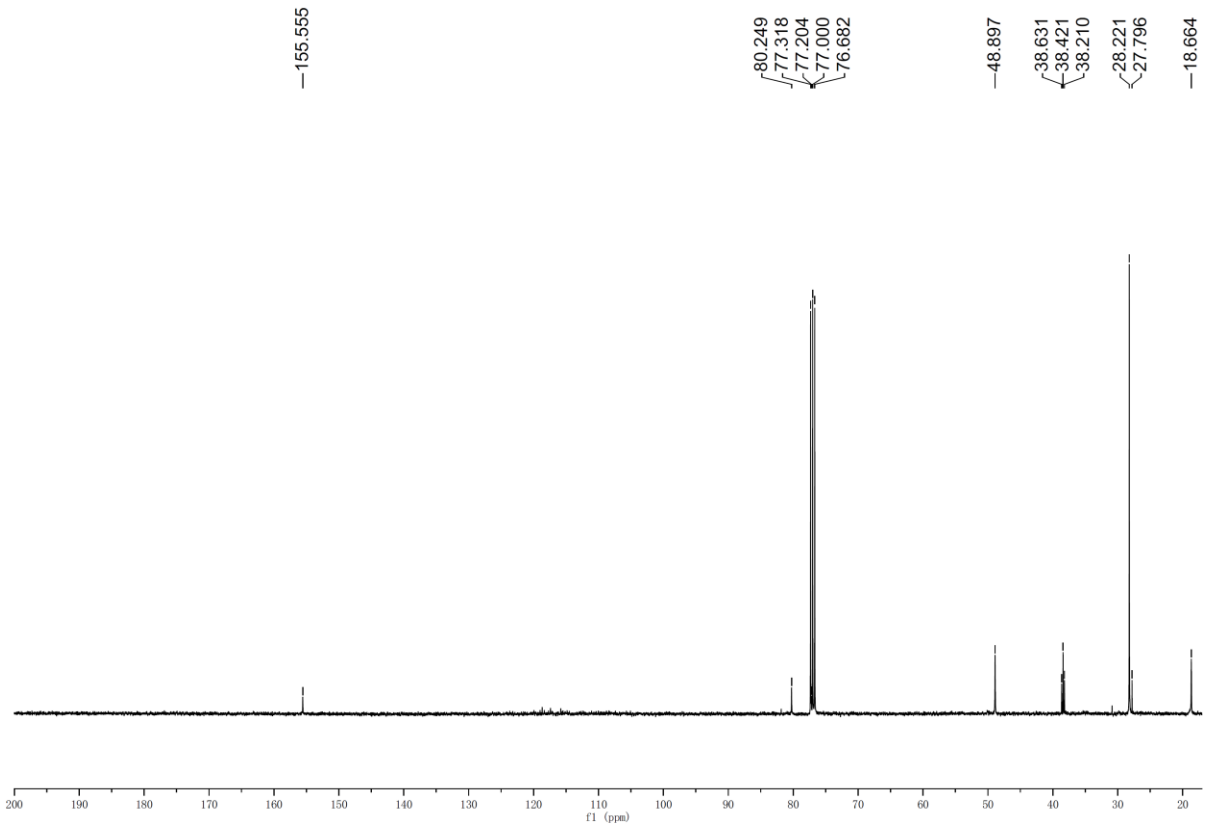

**Ethyl 2,2-difluoro-5-(2-hydroxyphenyl)-4-iodopentanoate (3o).**

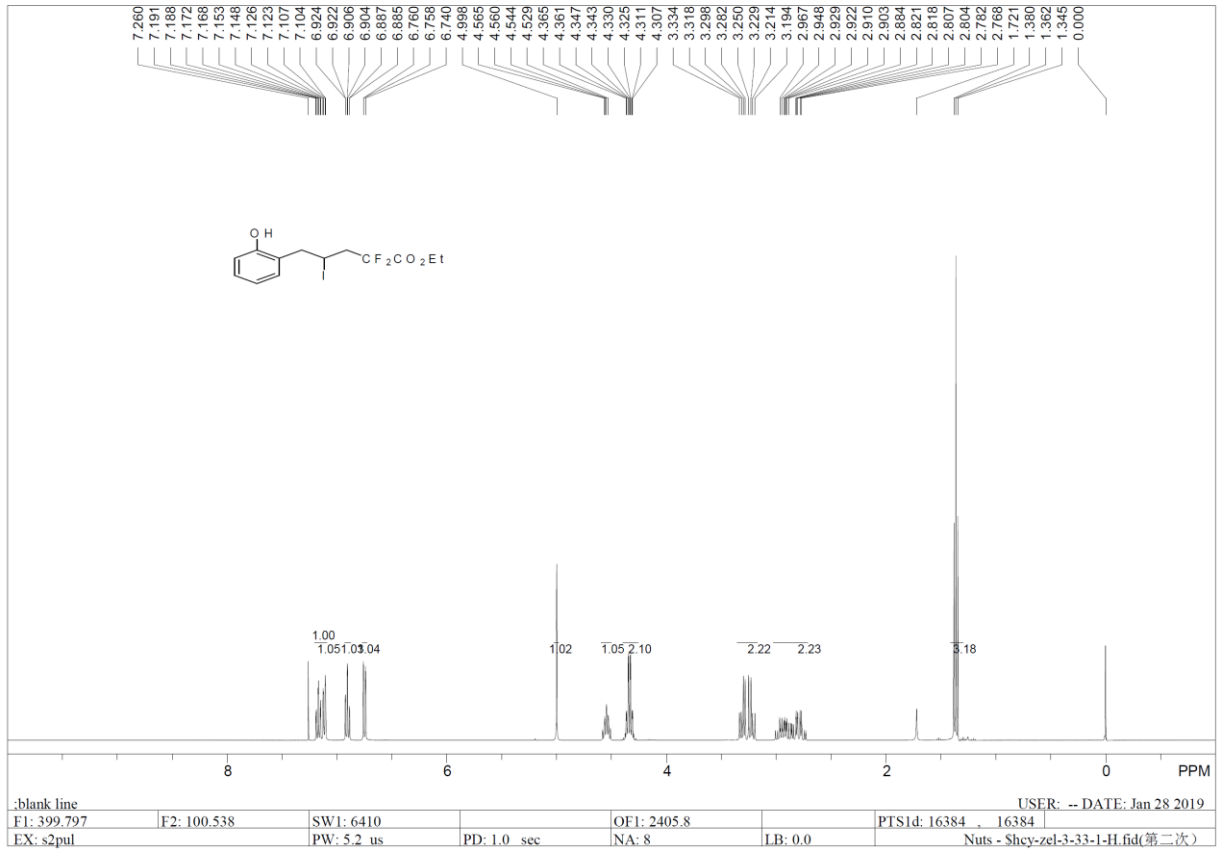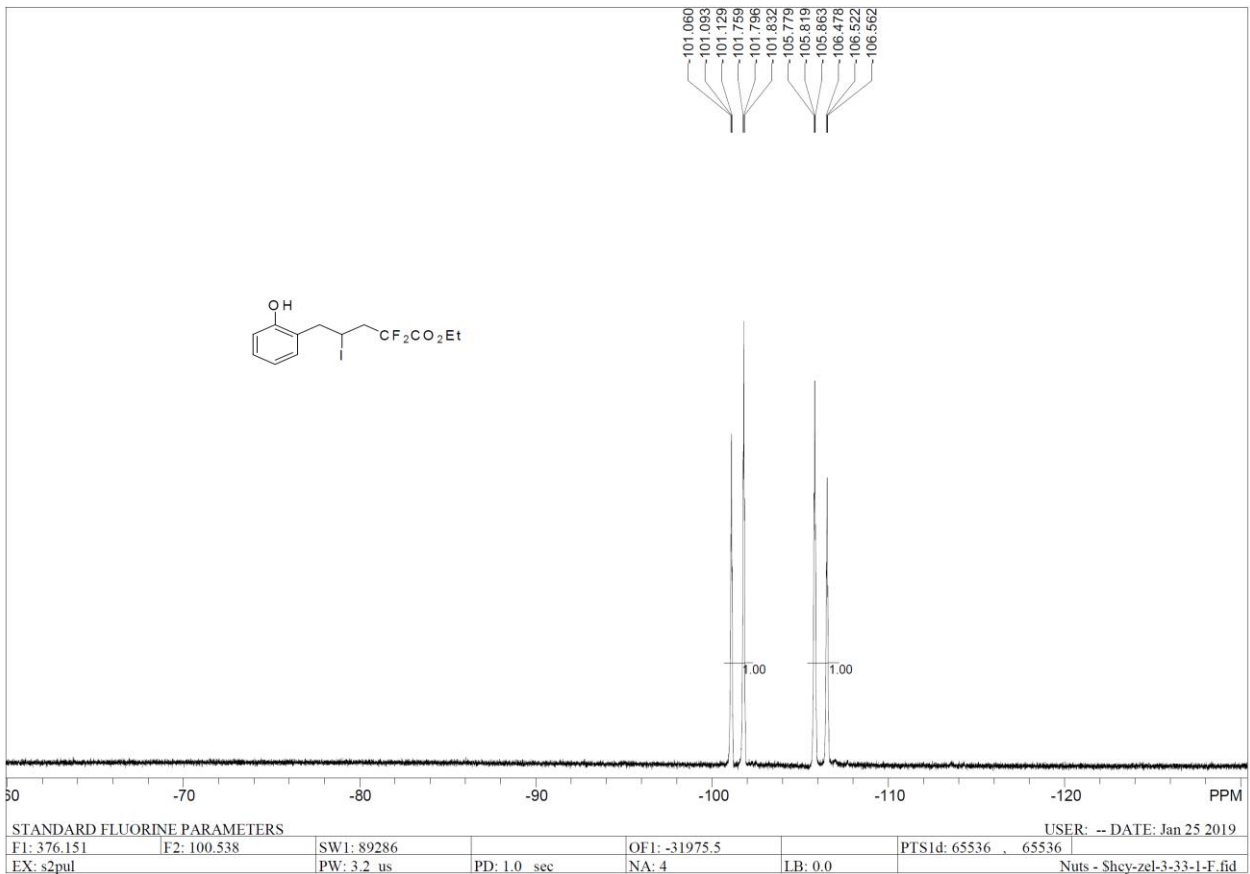

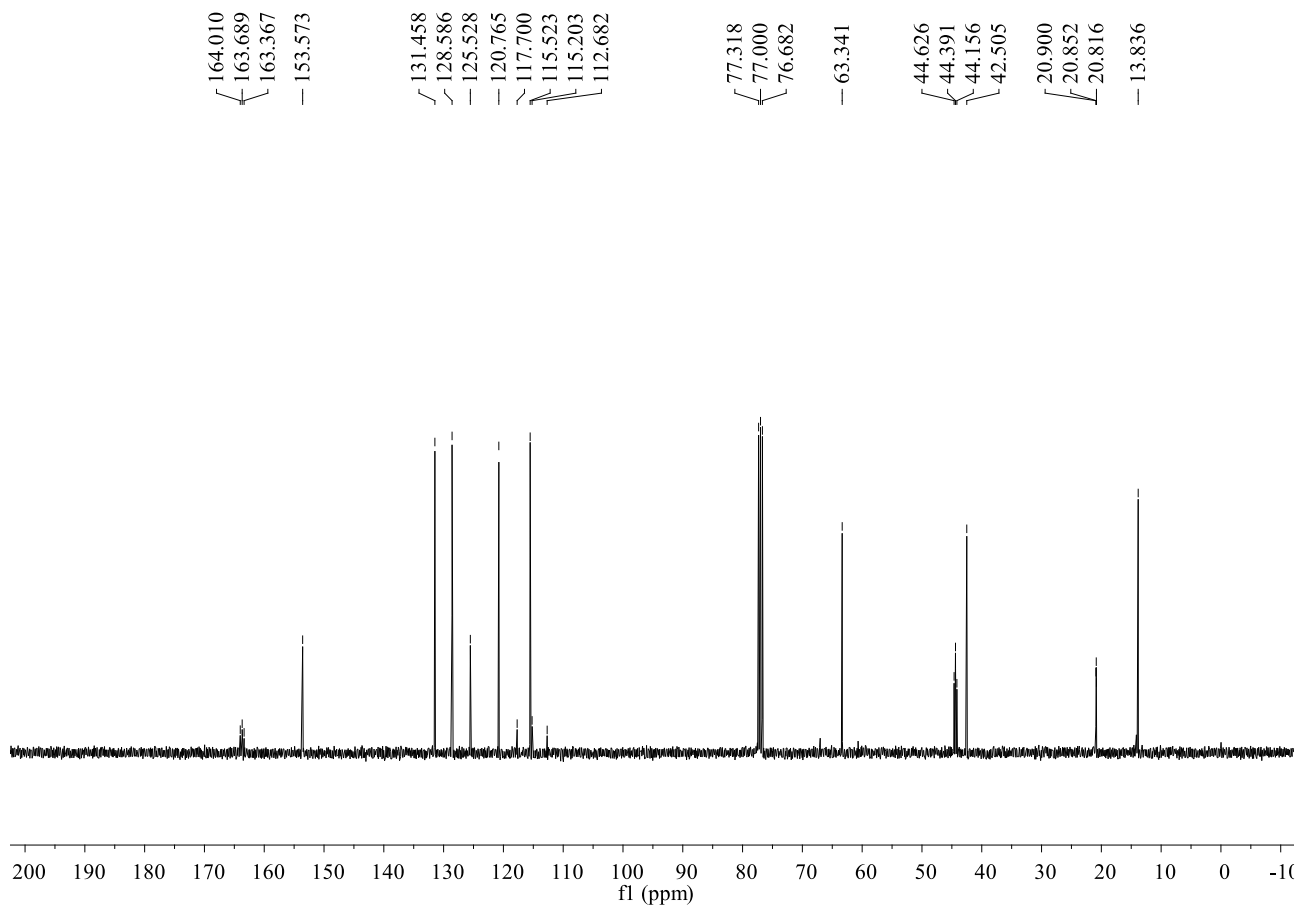

**Ethyl 2,2-difluoro-5-(2-hydroxy-5-methylphenyl)-4-iodopentanoate (3p).**

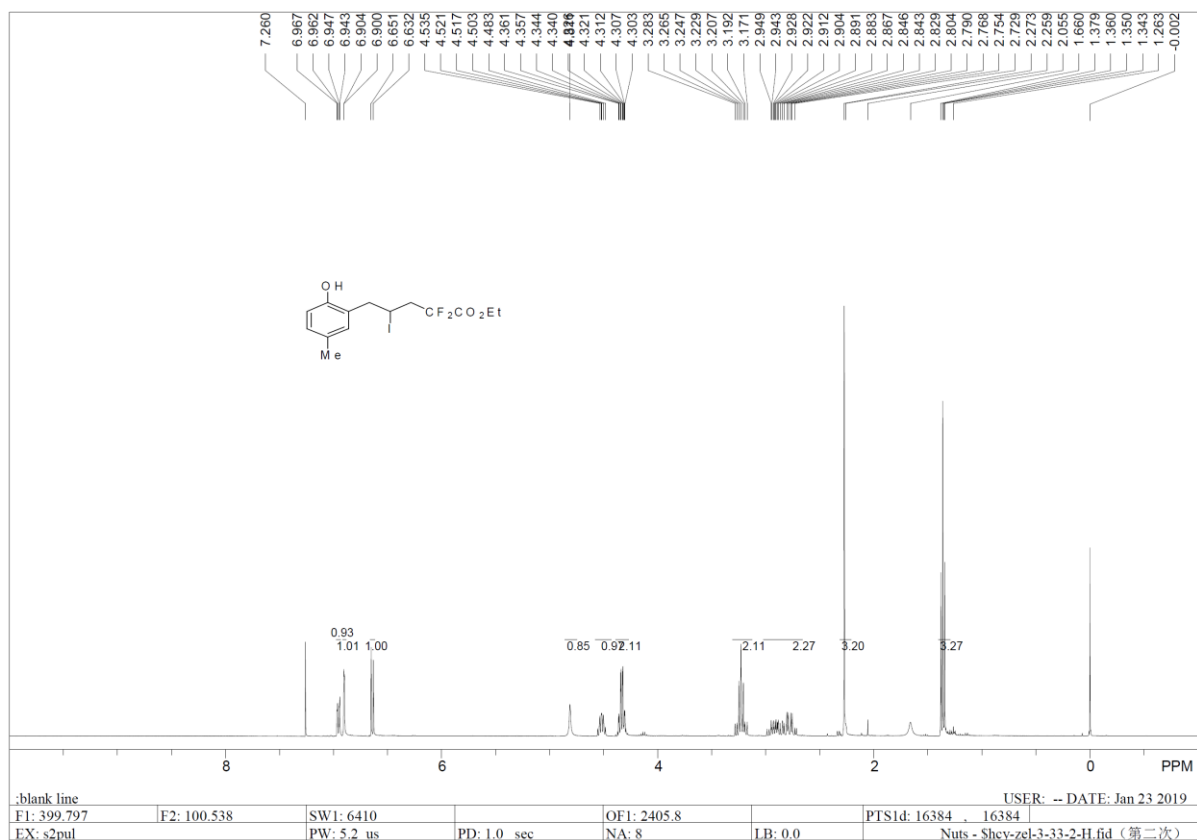

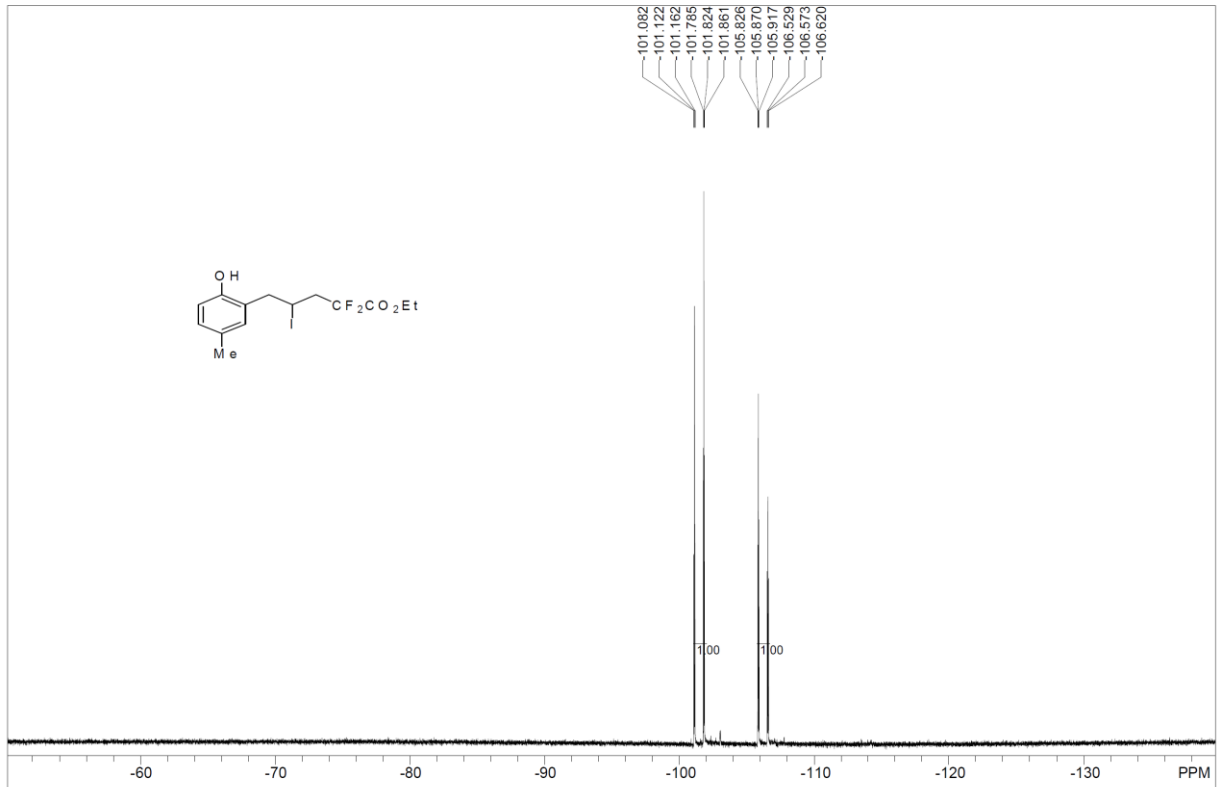

| STANDARD FLUORINE PARAMETERS |             |             |               |              |                          | USER: -- DATE: Jan 22 2019 |  |
|------------------------------|-------------|-------------|---------------|--------------|--------------------------|----------------------------|--|
| F1: 376.151                  | F2: 100.538 | SW1: 89286  | OFl: -31975.5 | PTS1d: 65536 | 65536                    |                            |  |
| EX: s2pul                    | PW: 3.2 us  | PD: 1.0 sec | NA: 4         | LB: 0.0      | Nuts - Shcy-3-33-2-F.fid |                            |  |

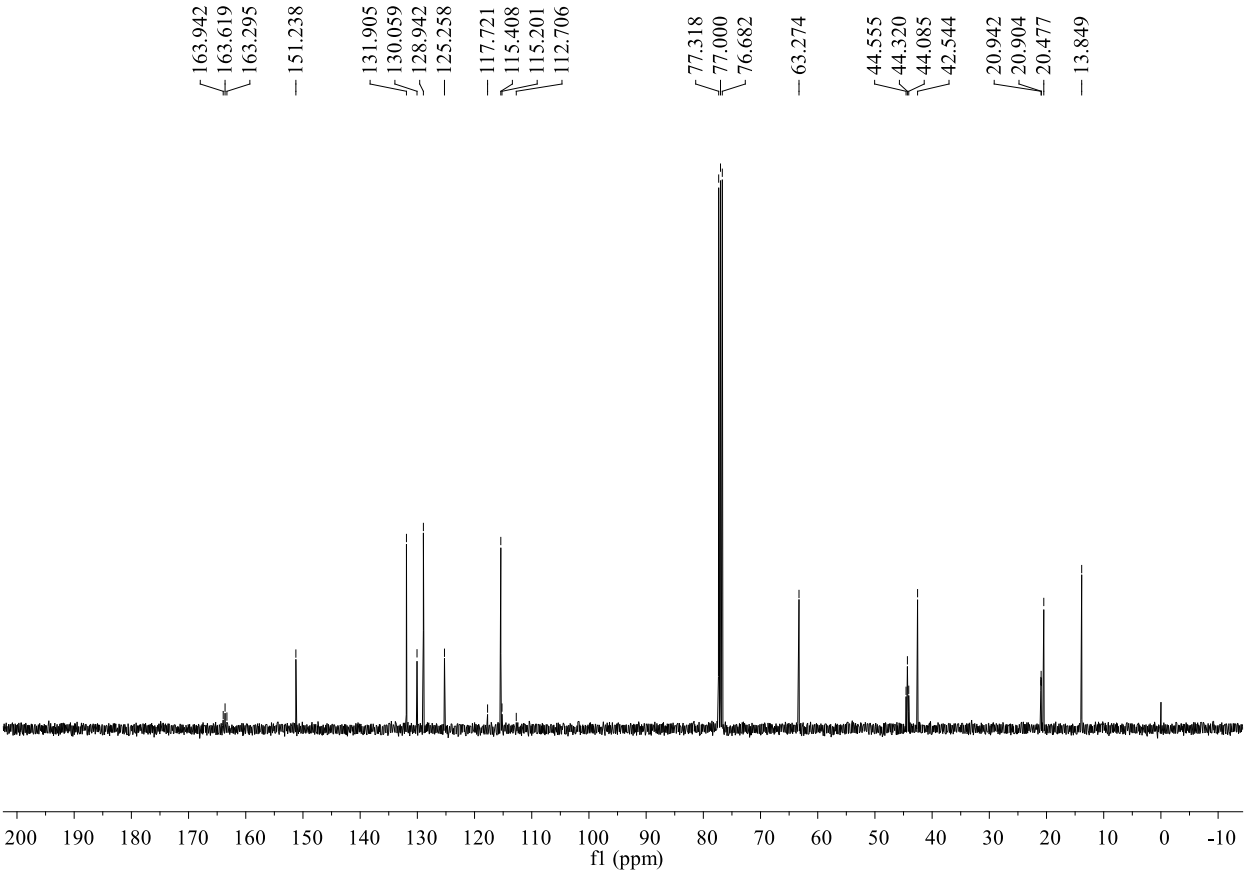

**Ethyl 5-(5-chloro-2-hydroxyphenyl)-2,2-difluoro-4-iodopentanoate (3q).**

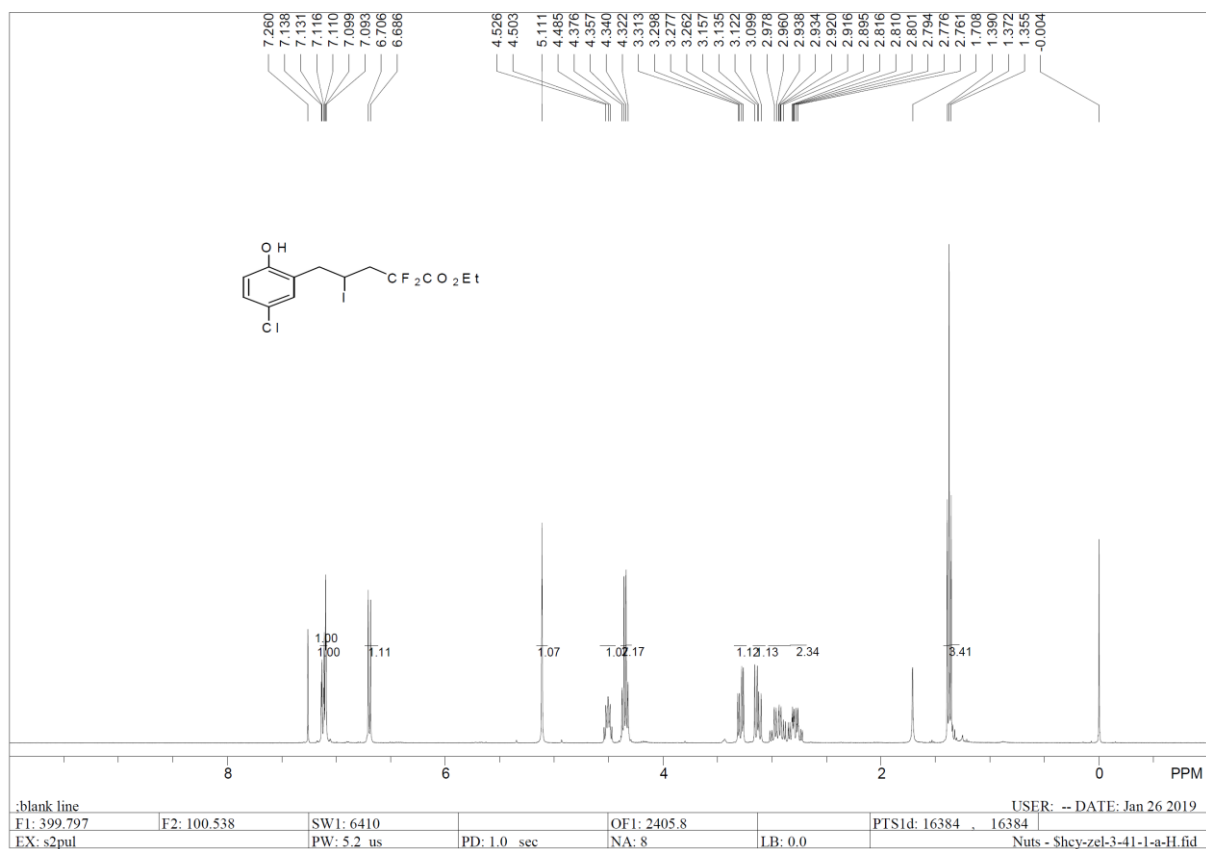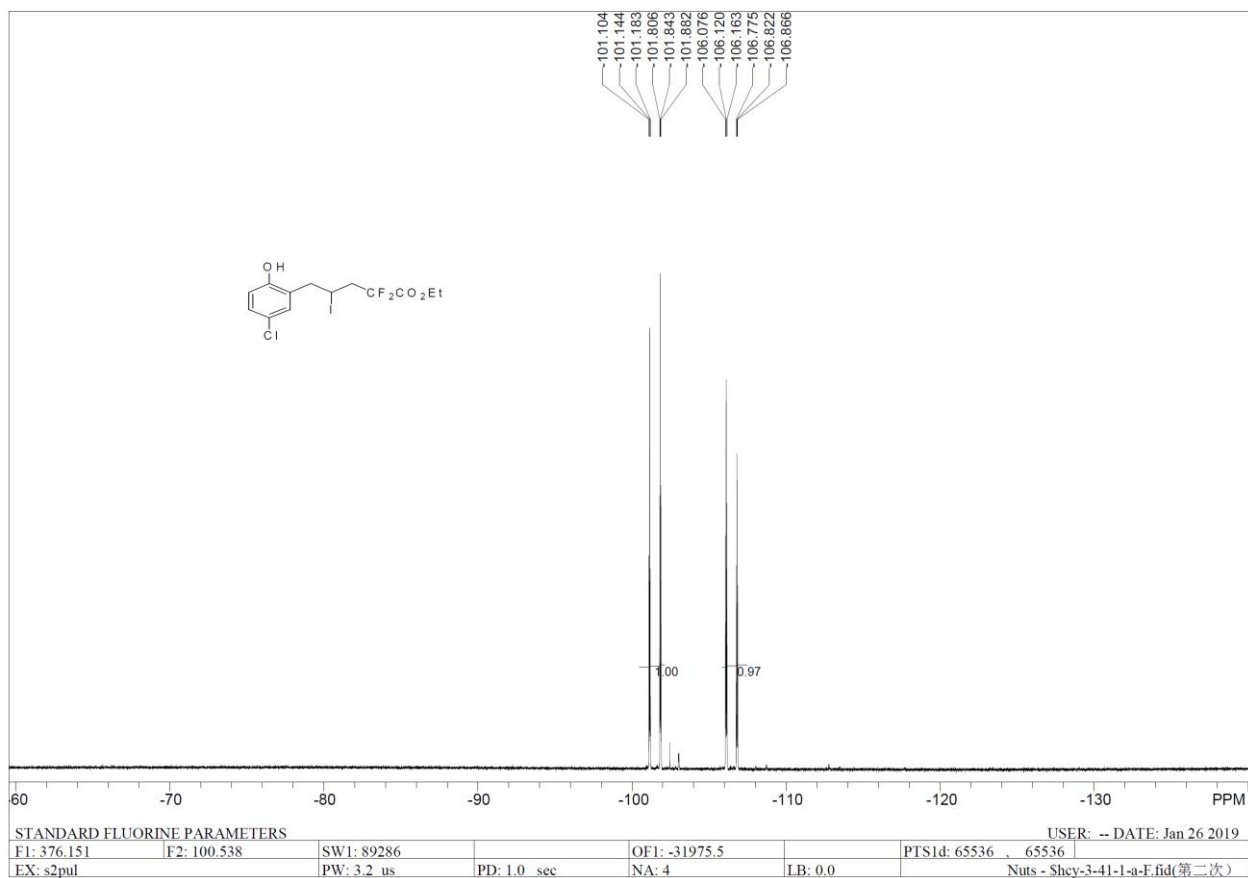

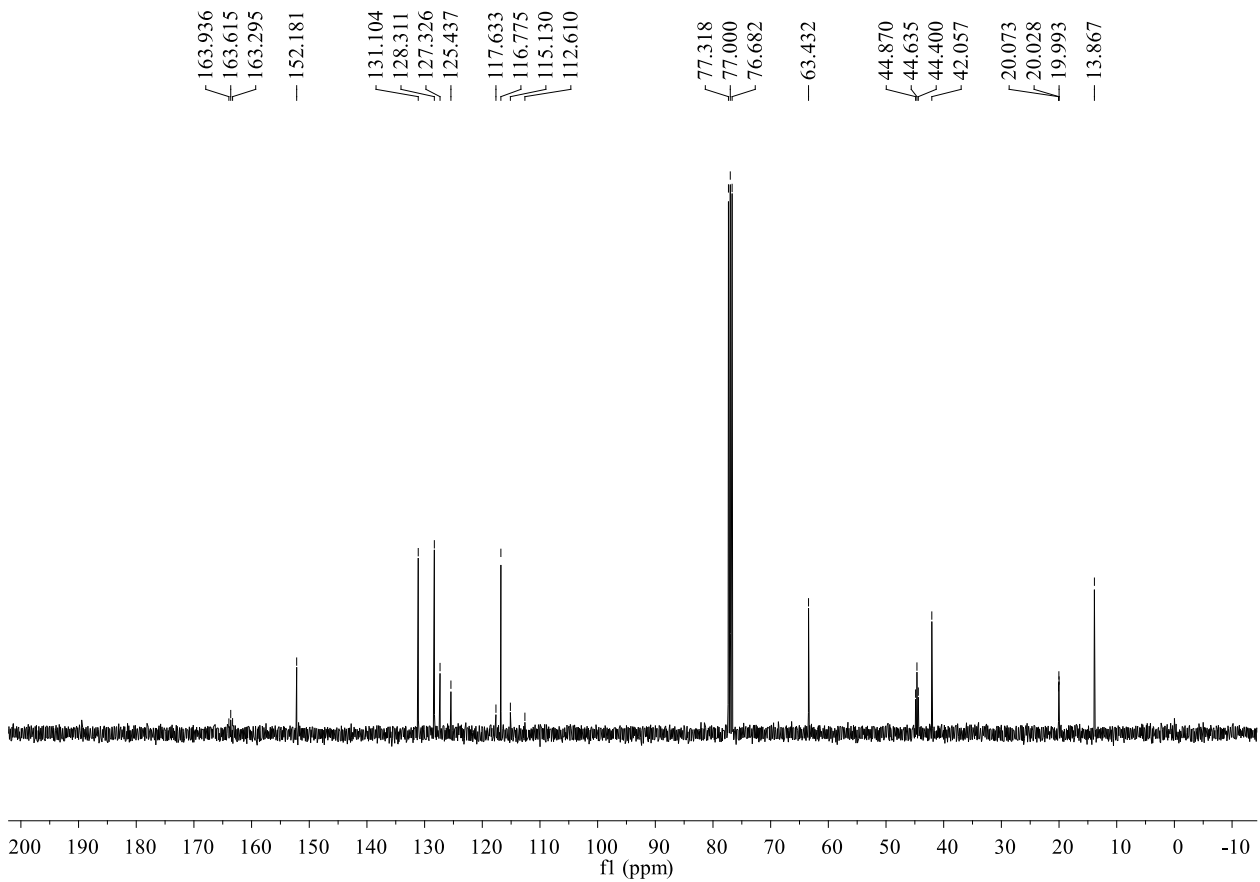

**Ethyl 2,2-difluoro-5-(2-hydroxy-3-methoxyphenyl)-4-iodopentanoate (3r).**

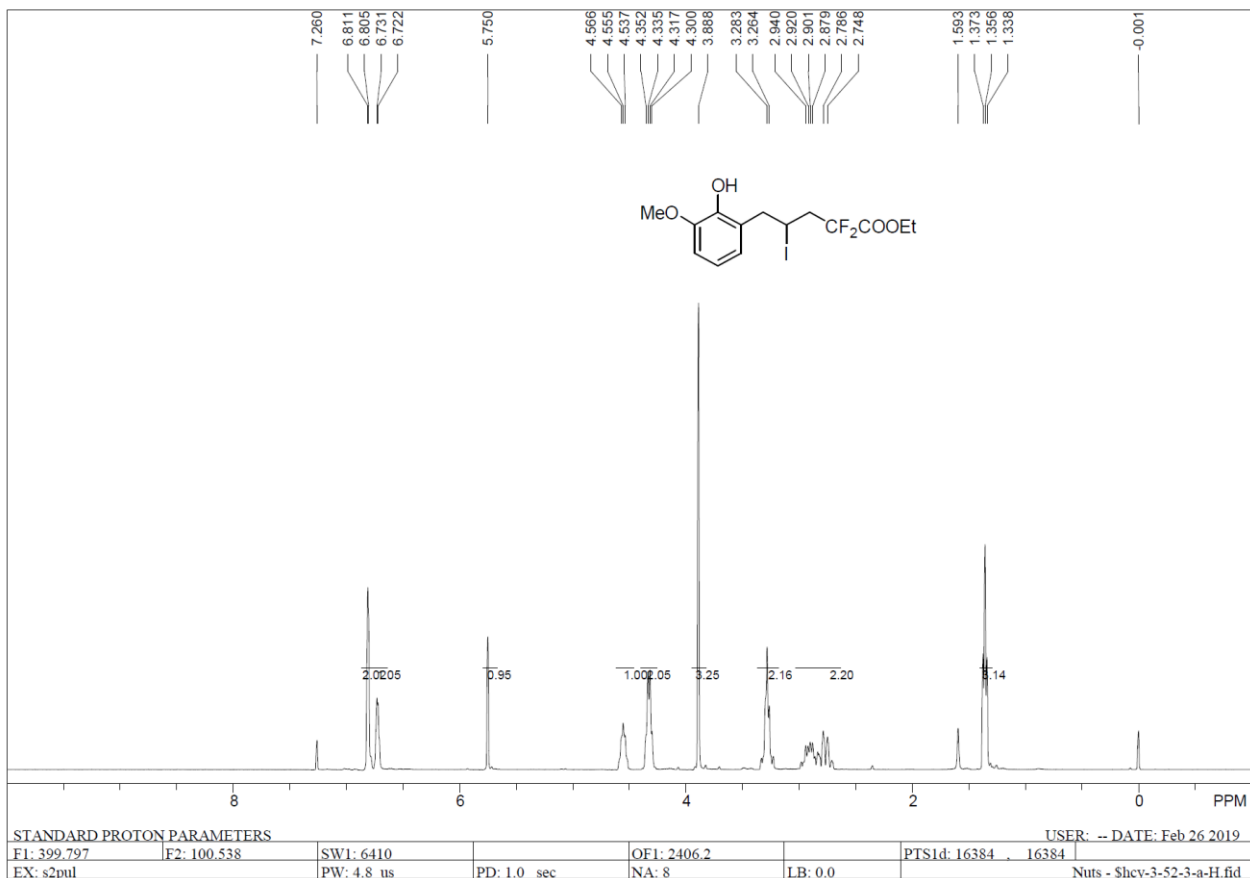

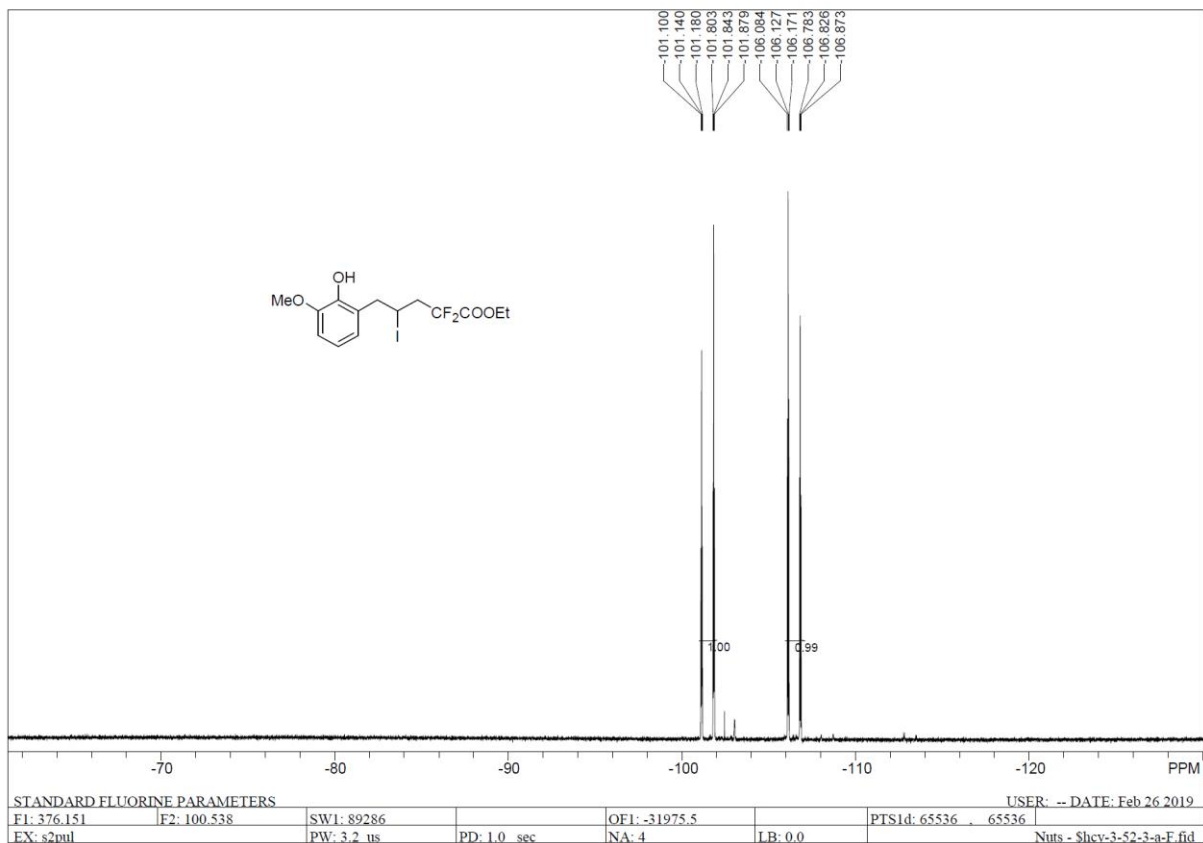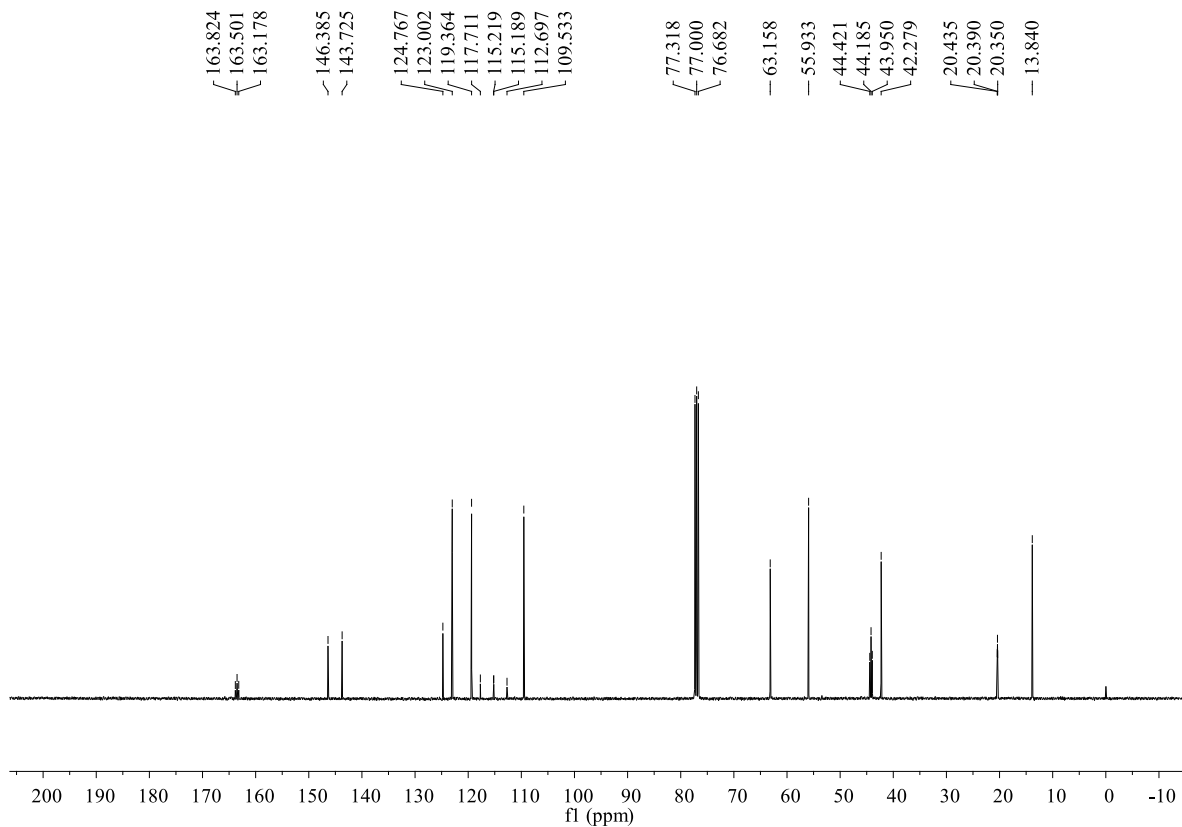

**Ethyl (E)-2,2-difluoro-4-iododec-3-enoate (5a).**

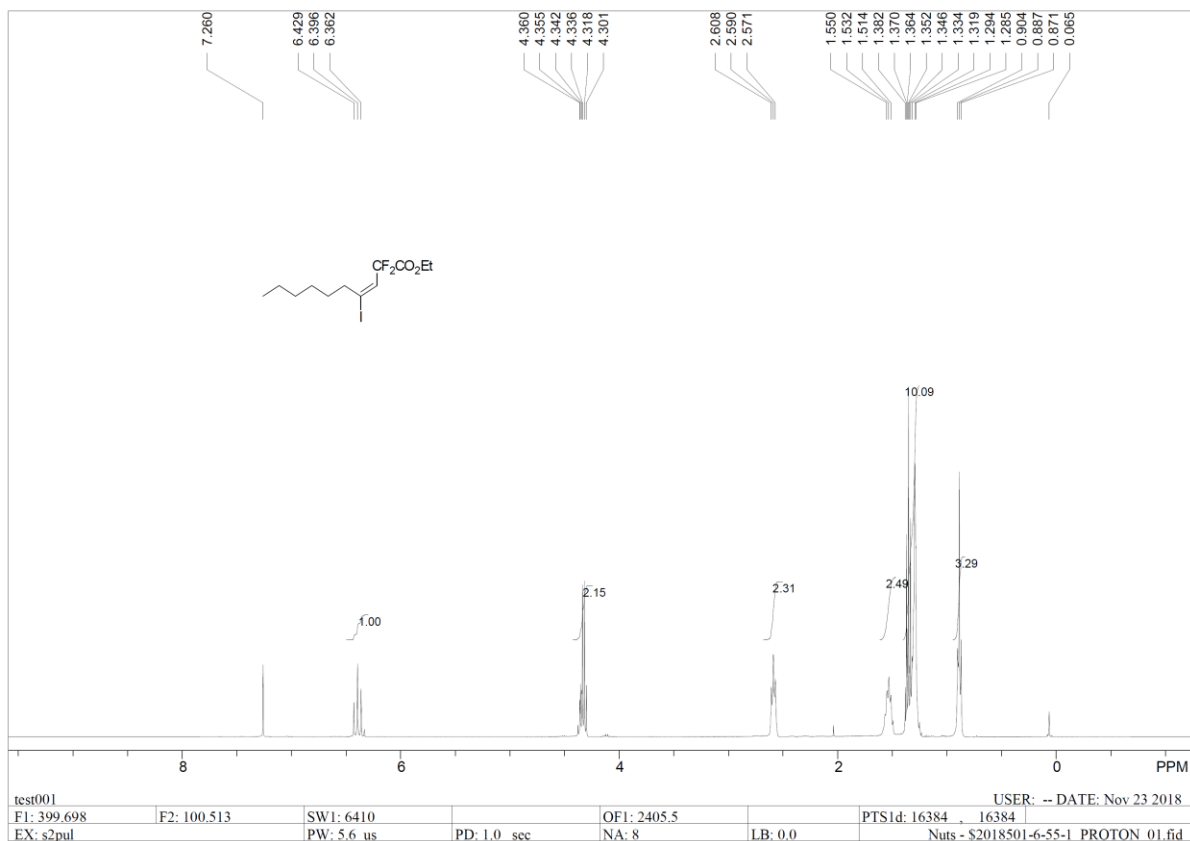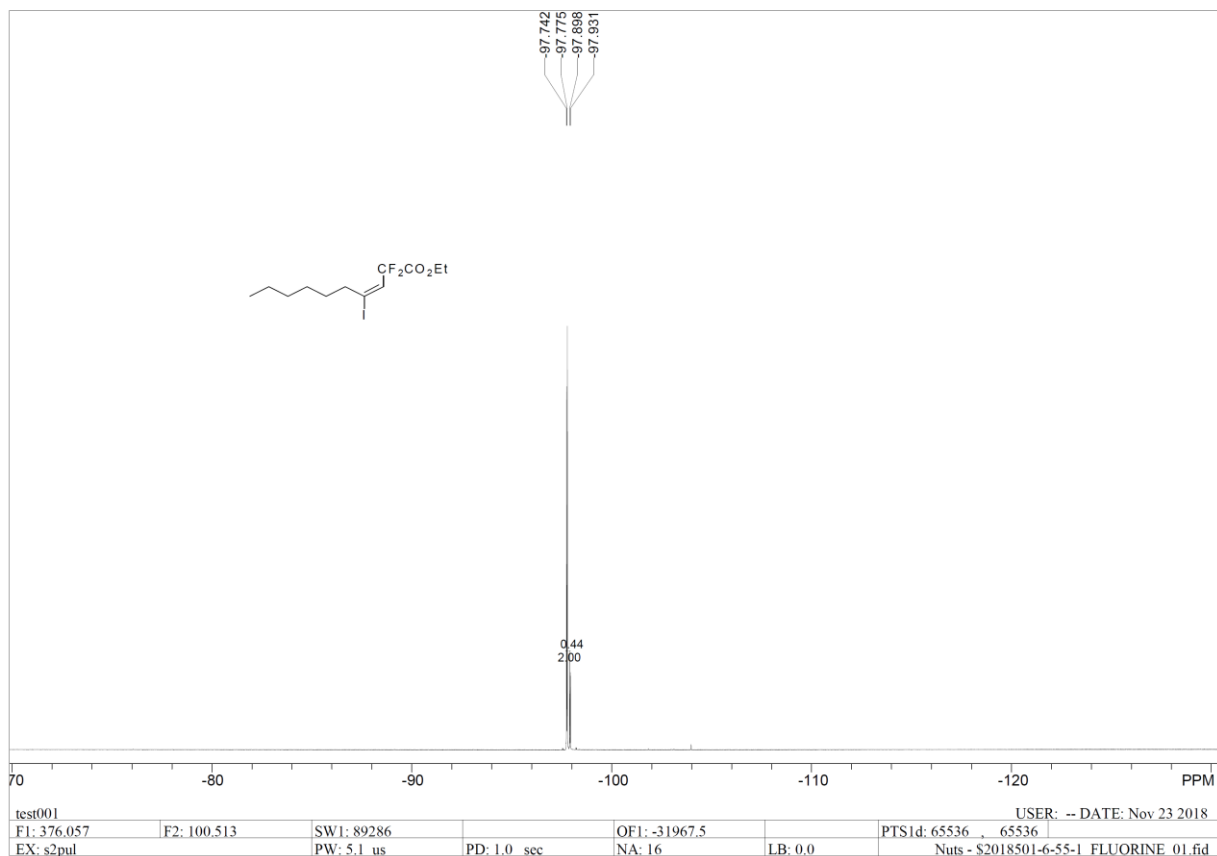



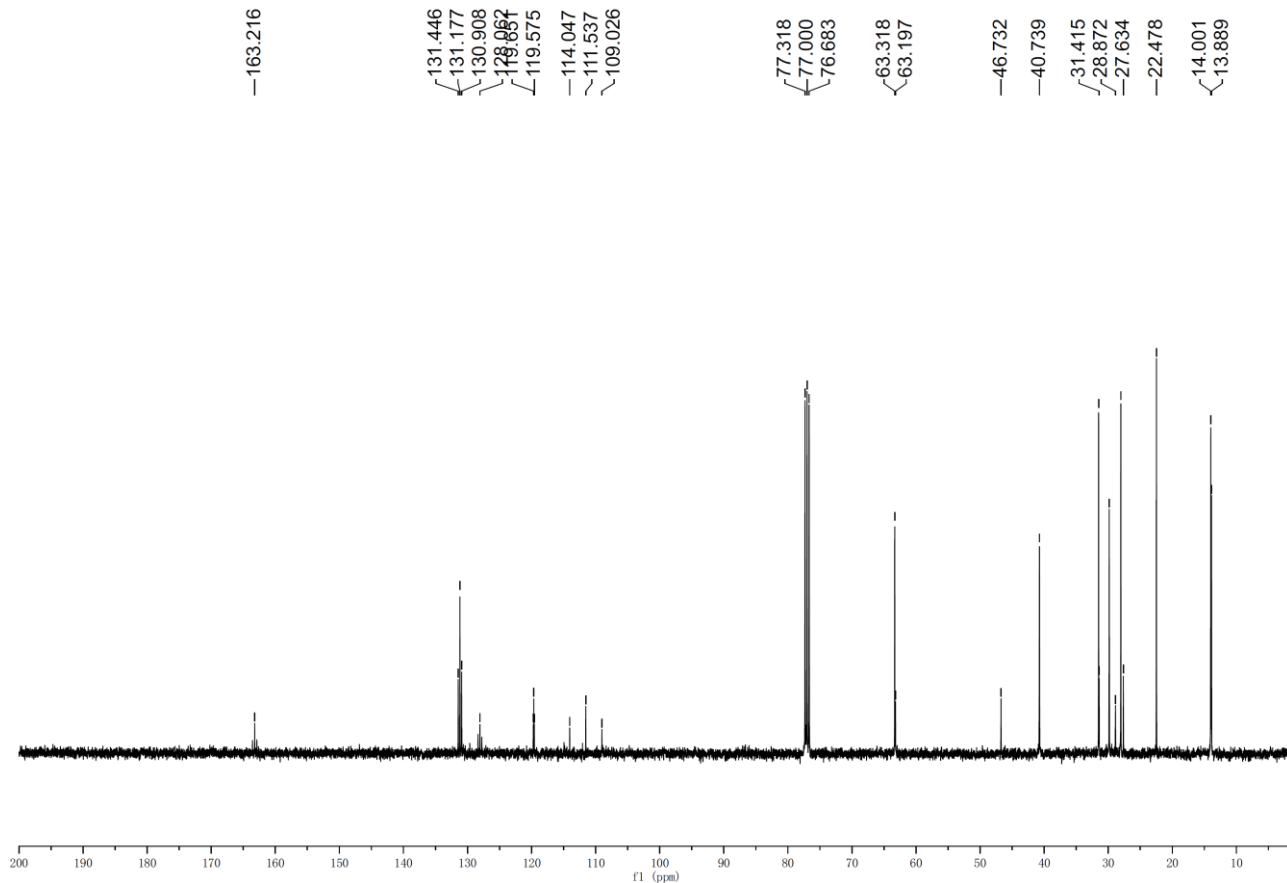

**Ethyl (*E*)-8-chloro-2,2-difluoro-4-iodooct-3-enoate (5b).**

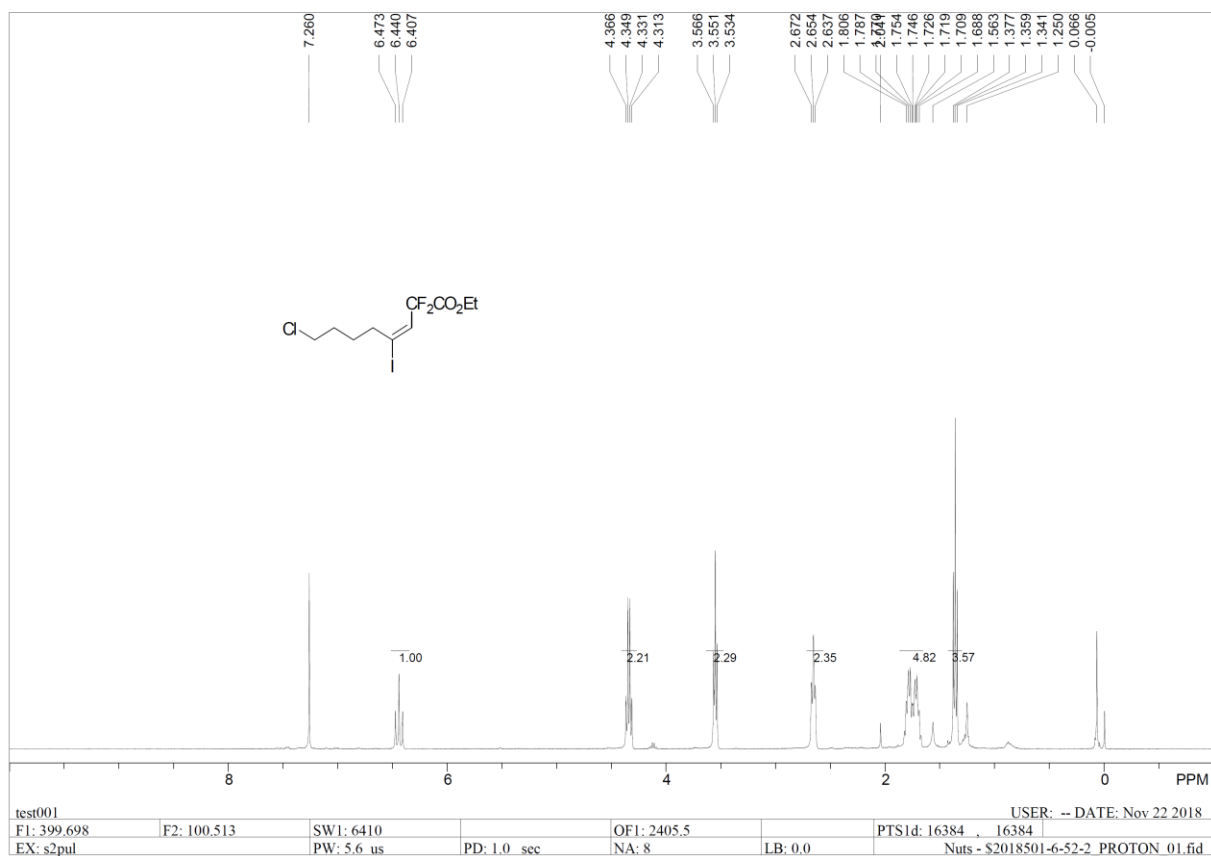

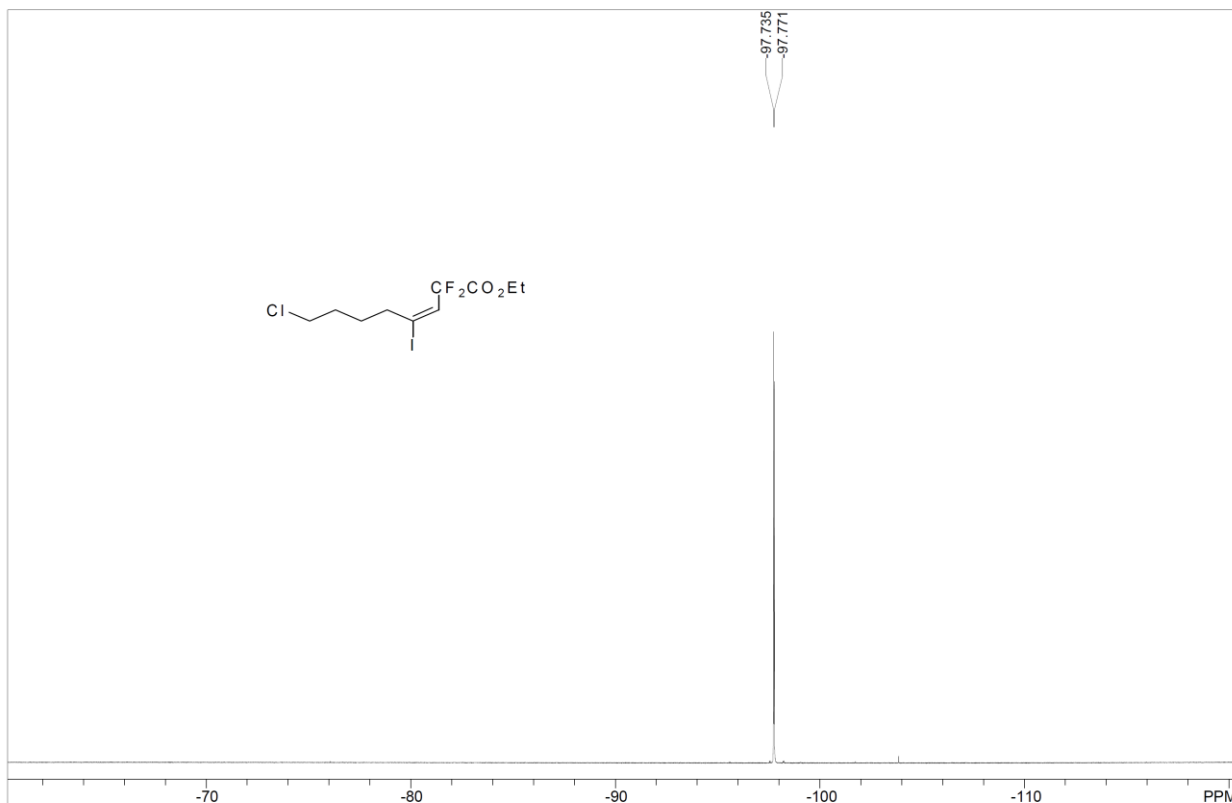

|             |             |             |               |              |                                        |                            |  |
|-------------|-------------|-------------|---------------|--------------|----------------------------------------|----------------------------|--|
| test001     |             |             |               |              |                                        | USER: -- DATE: Nov 22 2018 |  |
| F1: 376.057 | F2: 100.513 | SW1: 89286  | OF1: -31967.5 | PTS1d: 65536 | 65536                                  |                            |  |
| EX: s2pul   | PW: 5.1 us  | PD: 1.0 sec | NA: 16        | LB: 0.0      | Nuts - S2018501-6-52-2_FLUORINE_01.fid |                            |  |

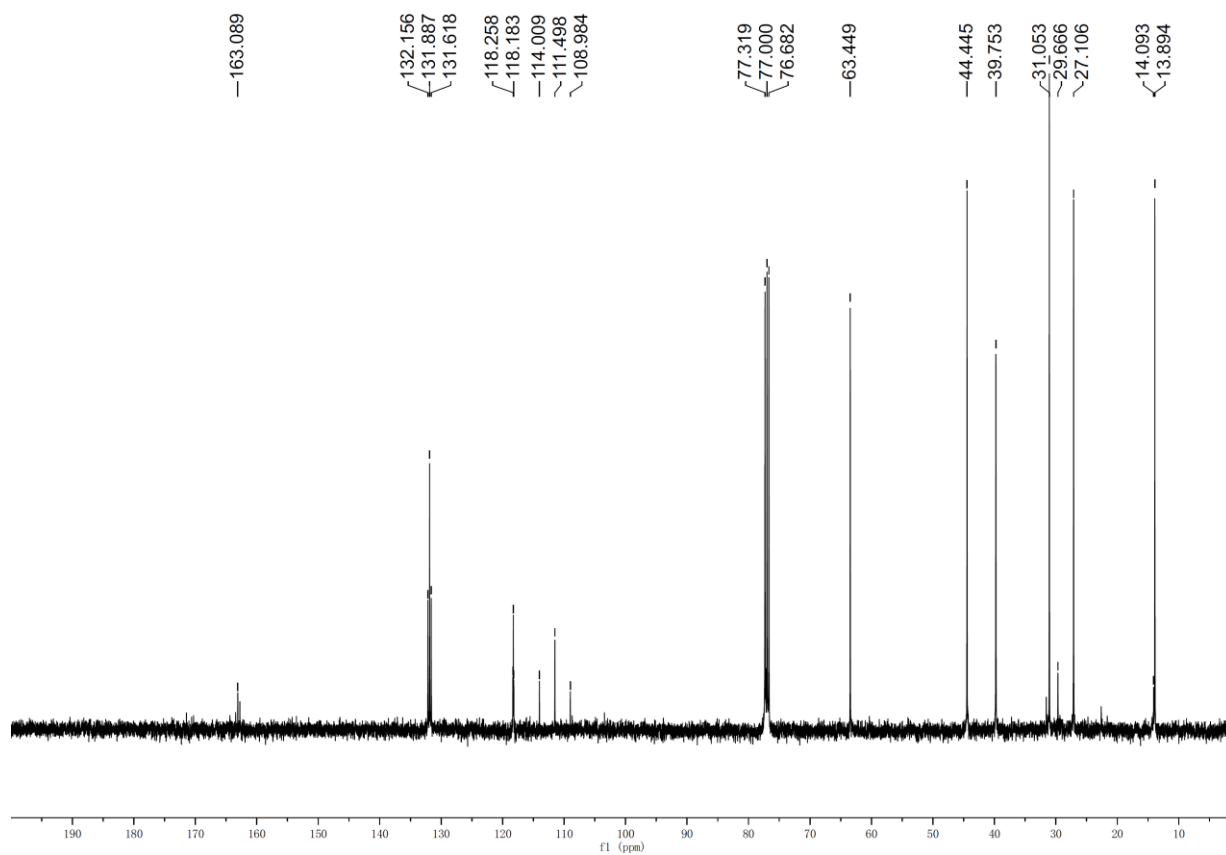

**Ethyl (*E*)-2,2-difluoro-6-hydroxy-4-iodohex-3-enoate (**5c**).**

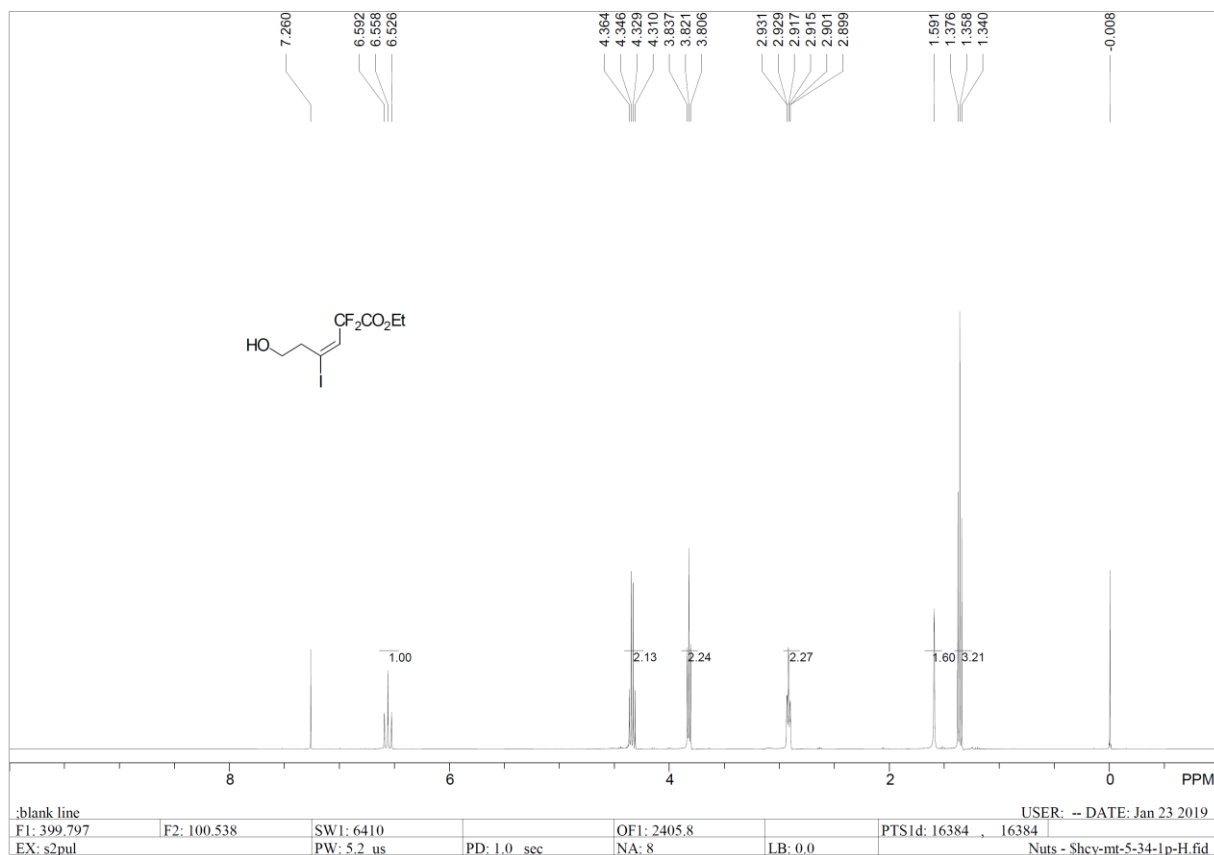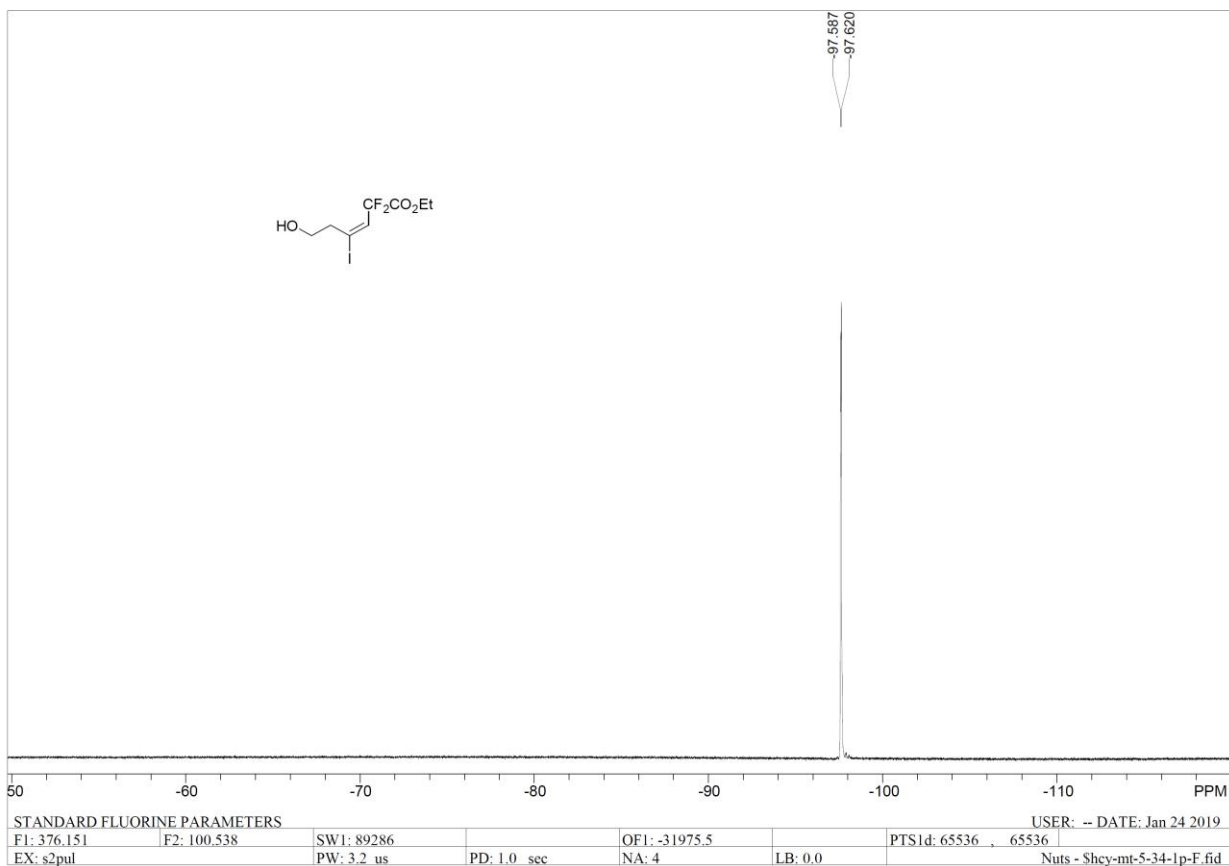

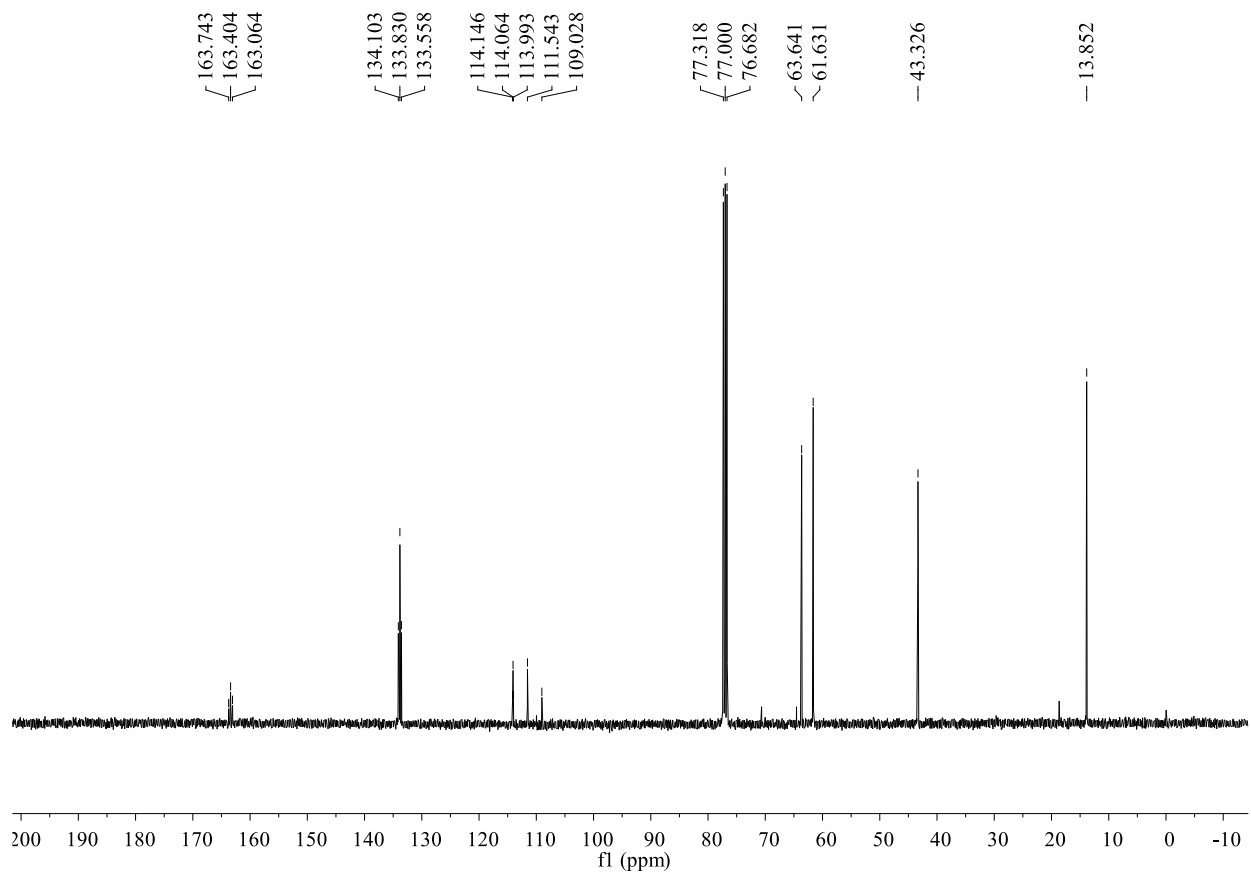

**Ethyl (*E*)-2,2-difluoro-4-iodo-6-phenylhex-3-enoate (5d).**

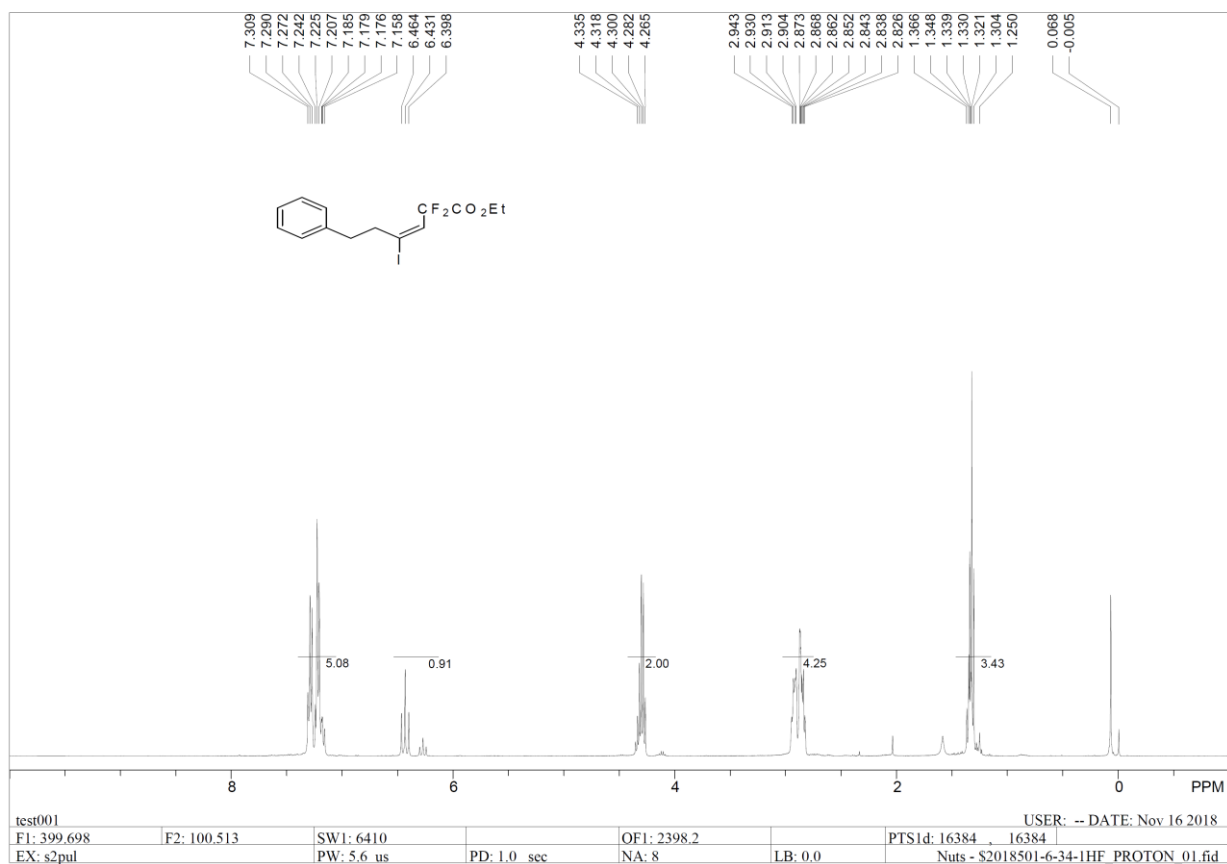

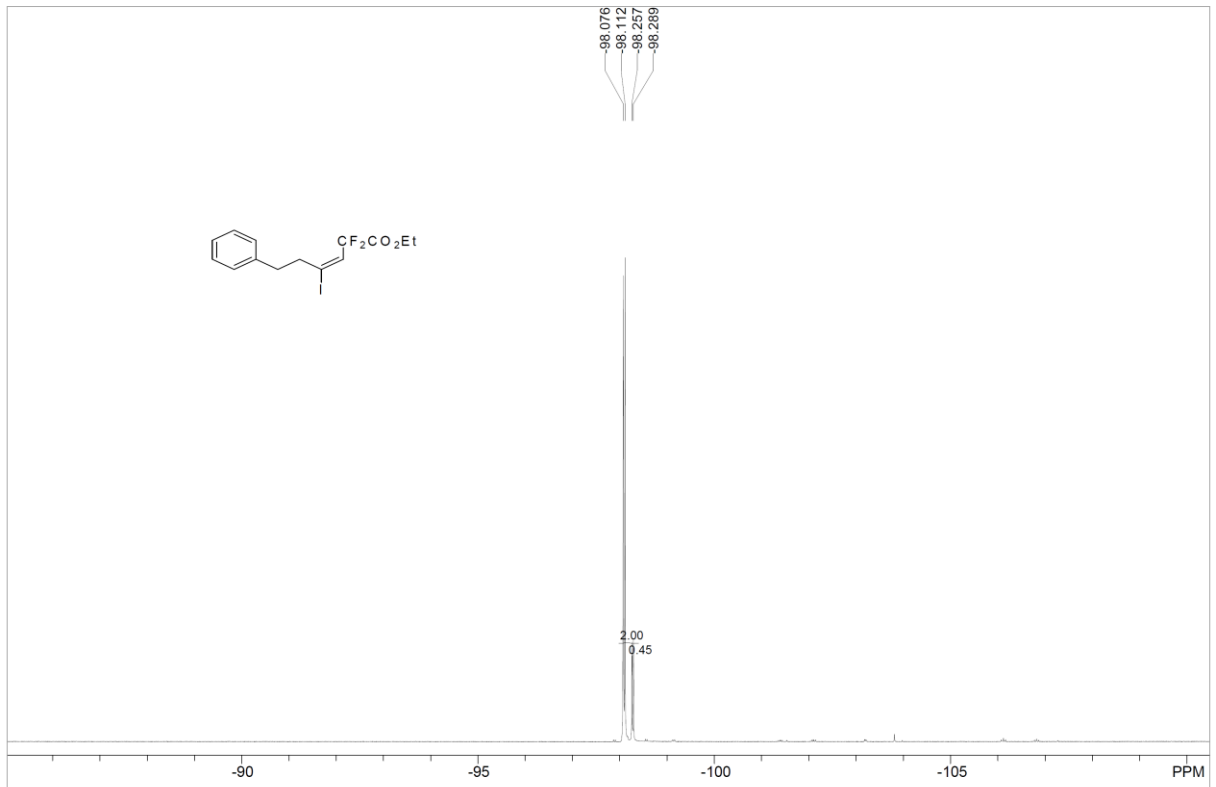

test001  
 F1: 376.057 F2: 100.513 SW1: 89286 OF1: -31967.5 PTS1d: 65536 , 65536 USER: -- DATE: Nov 16 2018  
 EX: s2pul PW: 5.1 us PD: 1.0 sec NA: 16 LB: 0.0 Nuts - S2018501-6-34-1HF\_FLUORINE\_01.fid

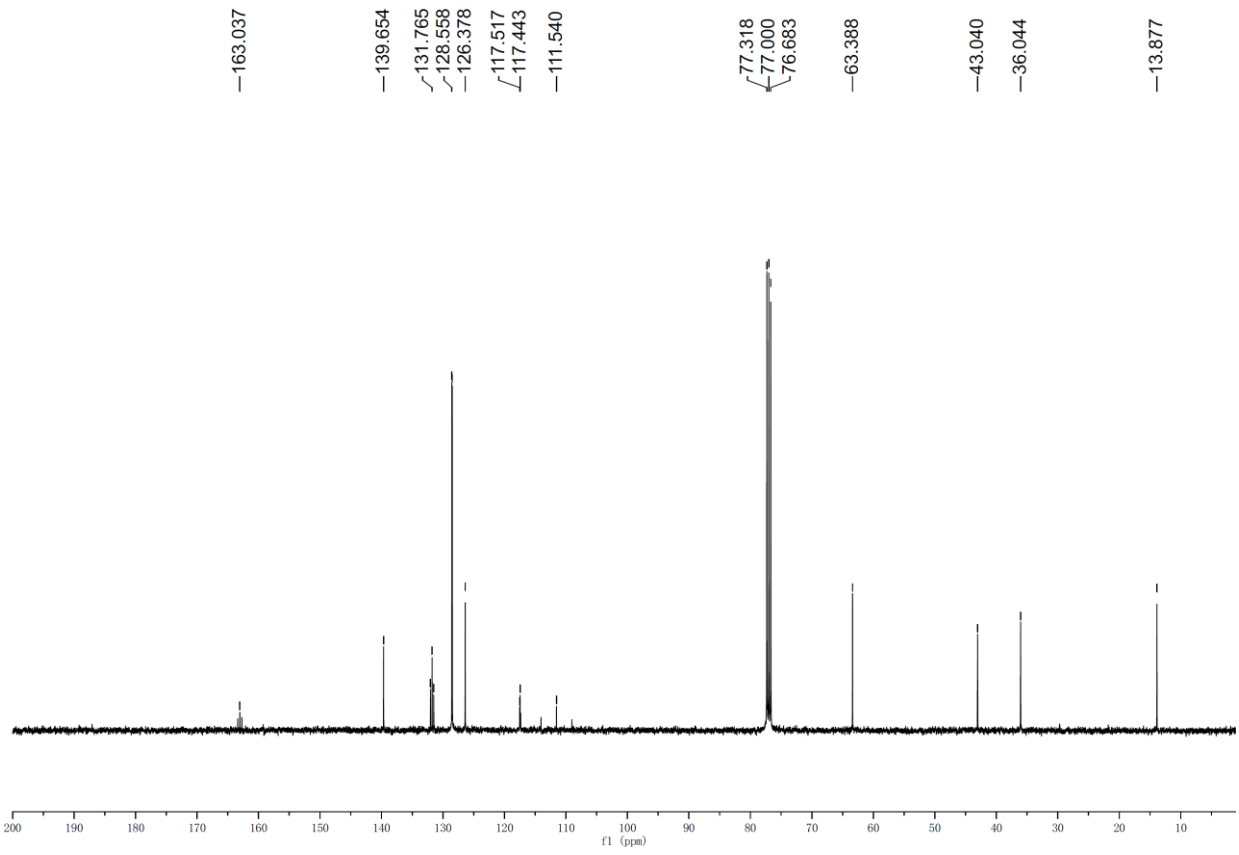

**Ethyl (E)-5-(3,5-dichlorobenzamido)-2,2-difluoro-4-iodo-5-methylhex-3-enoate (5e).**

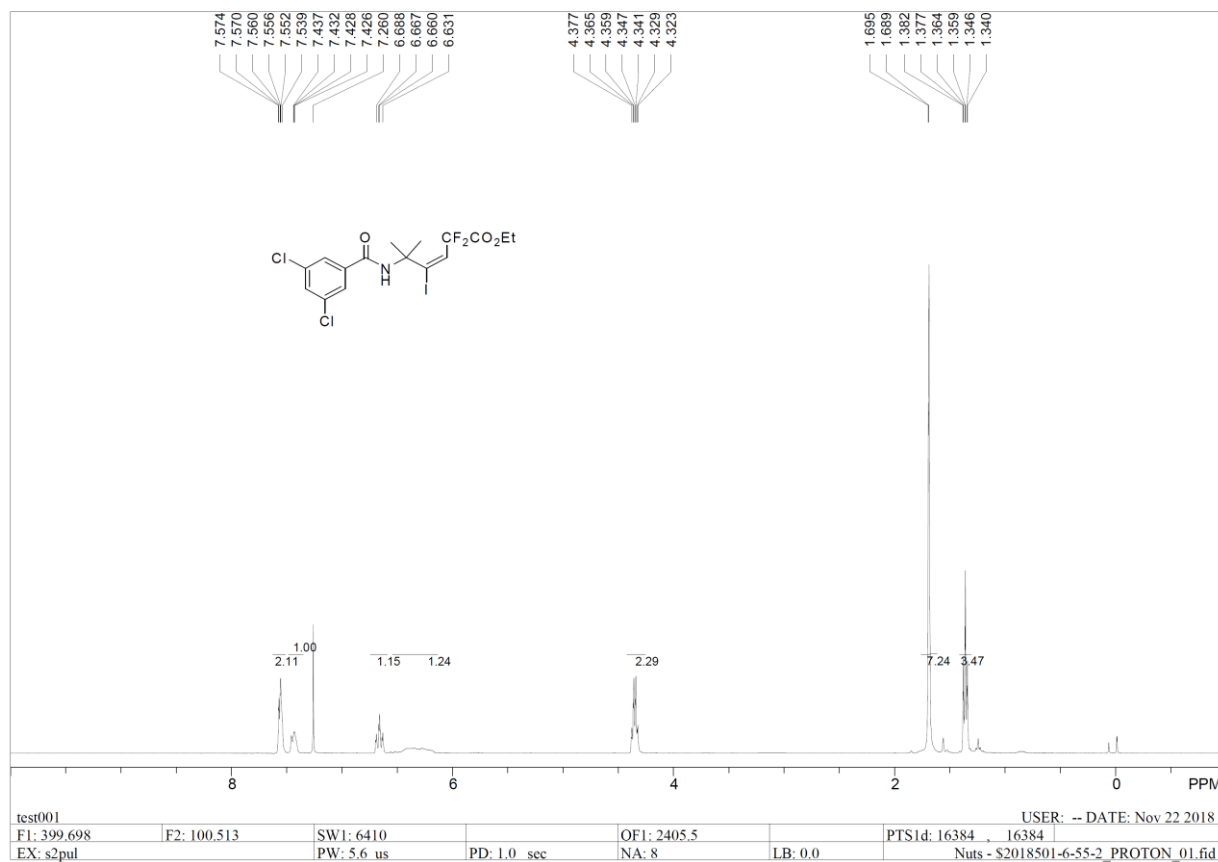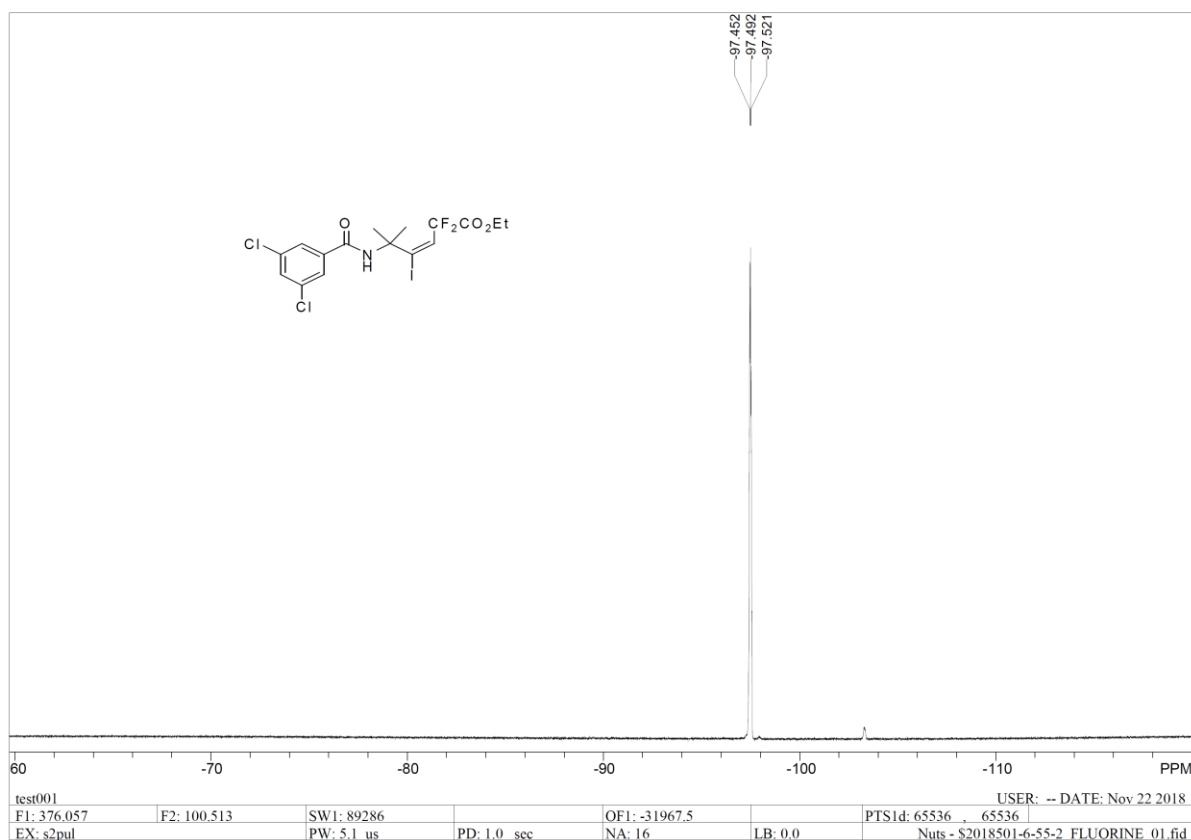

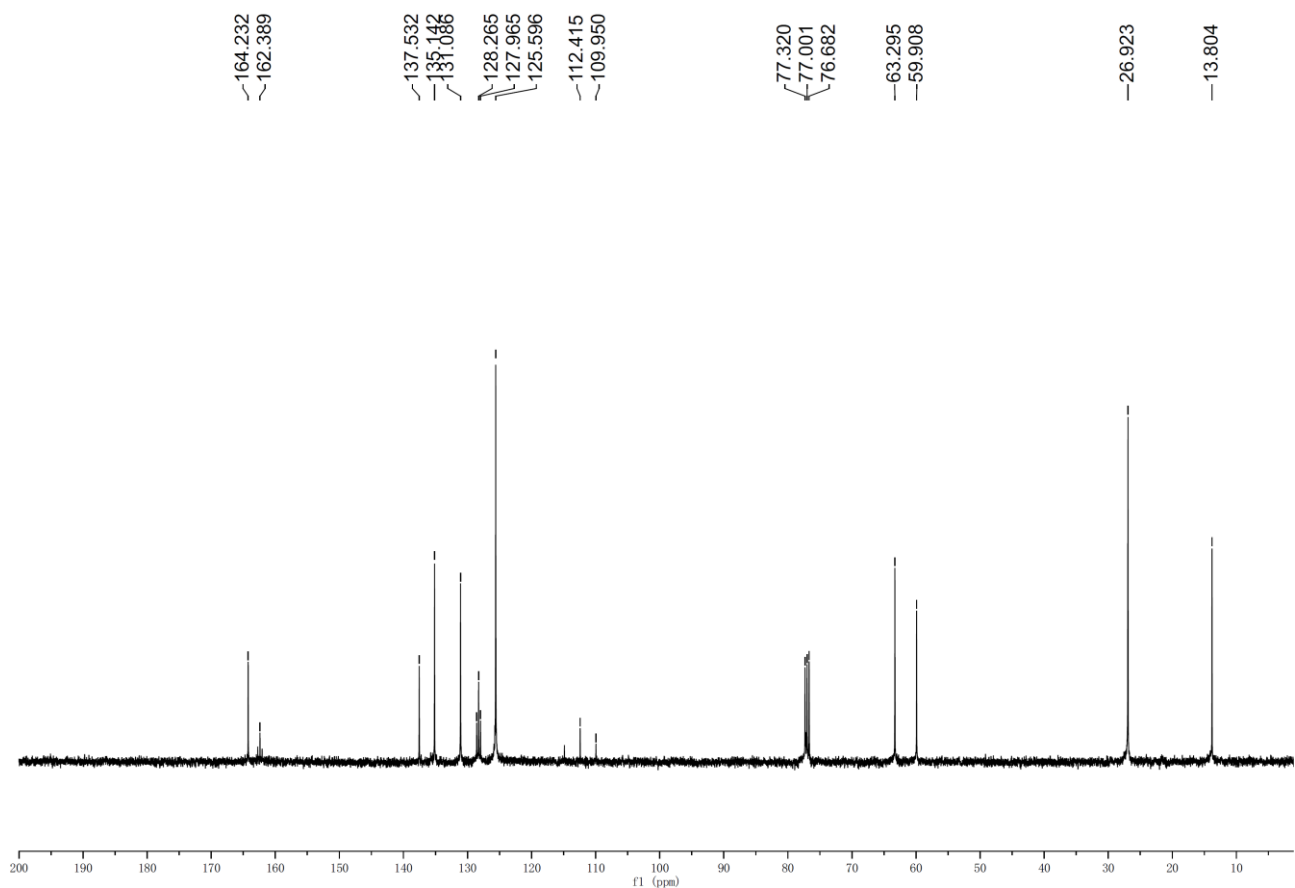

**Ethyl (*E*)-2,2-difluoro-4-iodo-4-(*p*-tolyl)but-3-enoate (**5f**).**

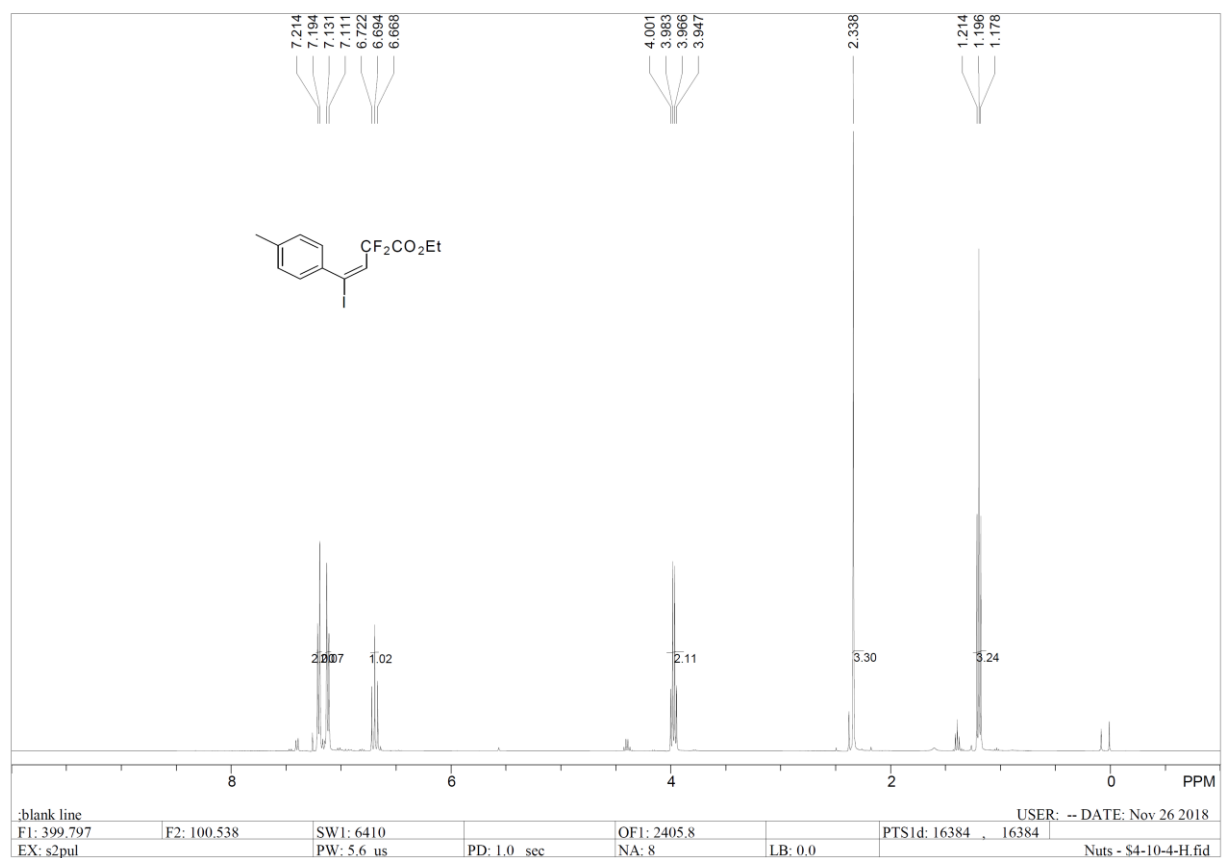

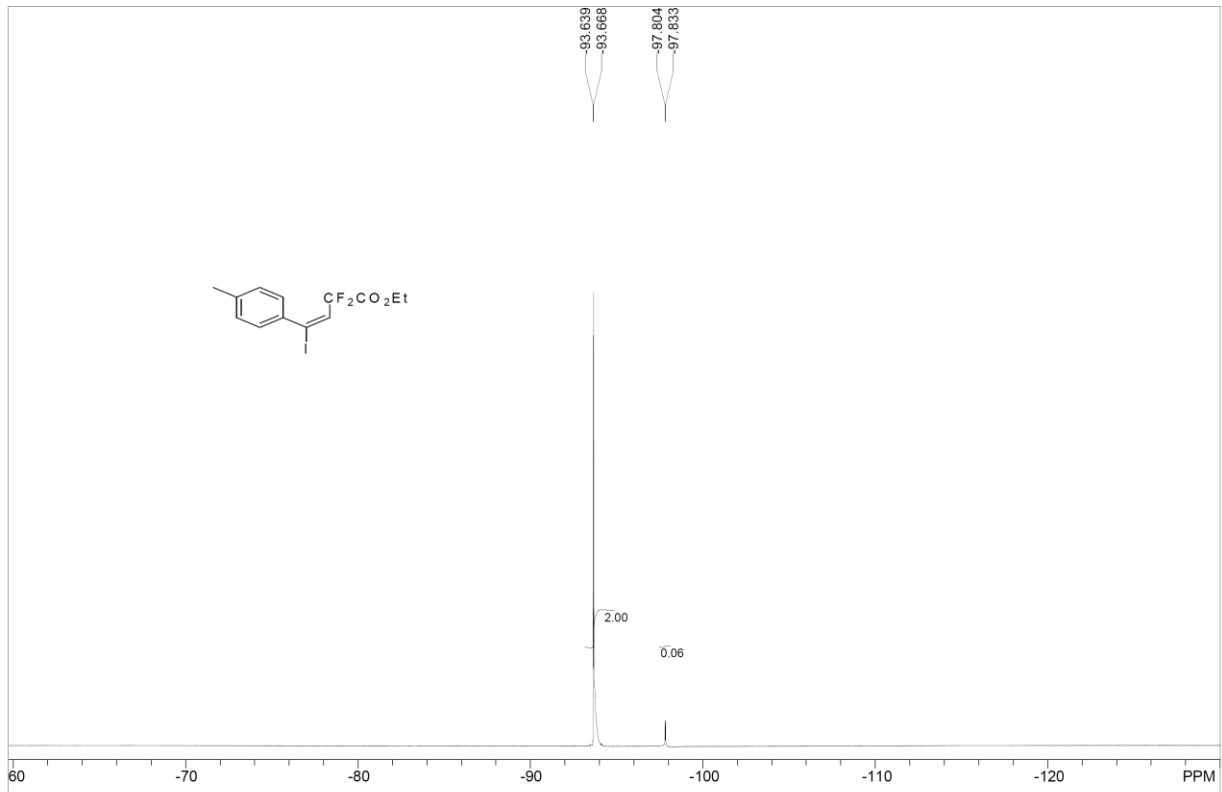

| STANDARD FLUORINE PARAMETERS |             |            |             |               |         | USER: -- DATE: Nov 28 2018 |       |
|------------------------------|-------------|------------|-------------|---------------|---------|----------------------------|-------|
| F1: 376.151                  | F2: 100.538 | SW1: 89286 |             | OE1: -31975.5 |         | PTS1d: 65536               | 65536 |
| EX: s2pul                    |             | PW: 3.2 us | PD: 1.0 sec | NA: 4         | LB: 0.0 | Nuts - S4-10-4-F.fid       |       |

- 162.513
- 162.181
- 139.612
- 137.780
- 132.641
- 128.185
- 127.759
- 113.306
- 110.821
- 109.323
- 109.221
- 109.120
- 108.338
- 77.318
- 77.000
- 76.682
- 63.051
- 21.303
- 21.118
- 13.916
- 13.626

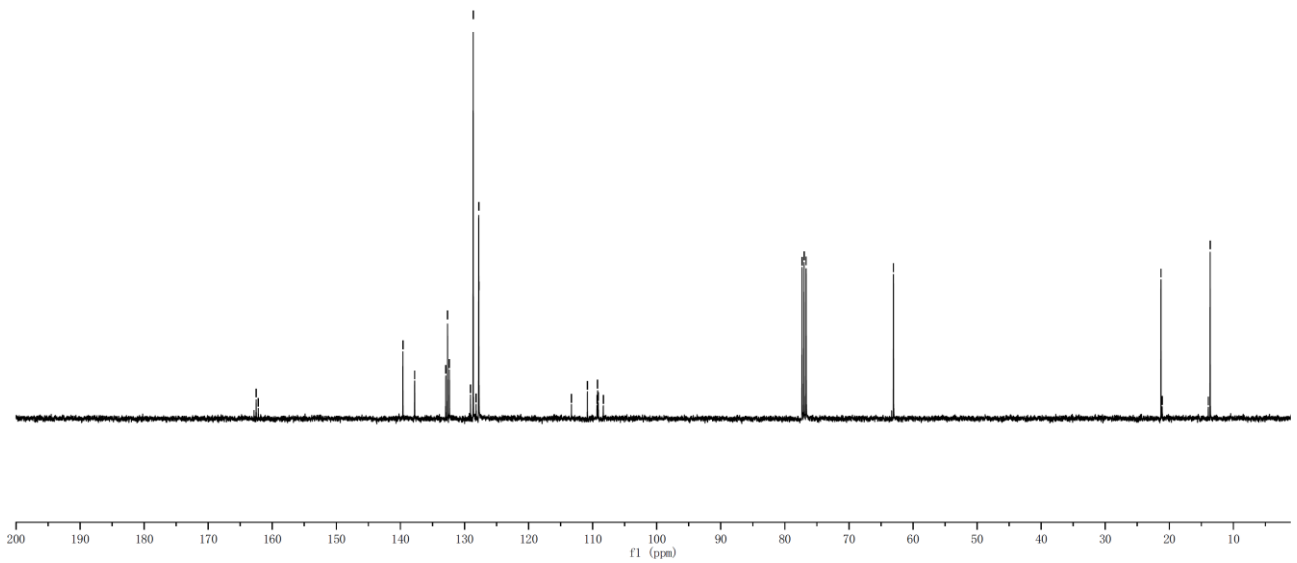



**Ethyl (E)-2,2-difluoro-4-iodo-4-(4-(trifluoromethyl)phenyl)but-3-enoate (5g).**

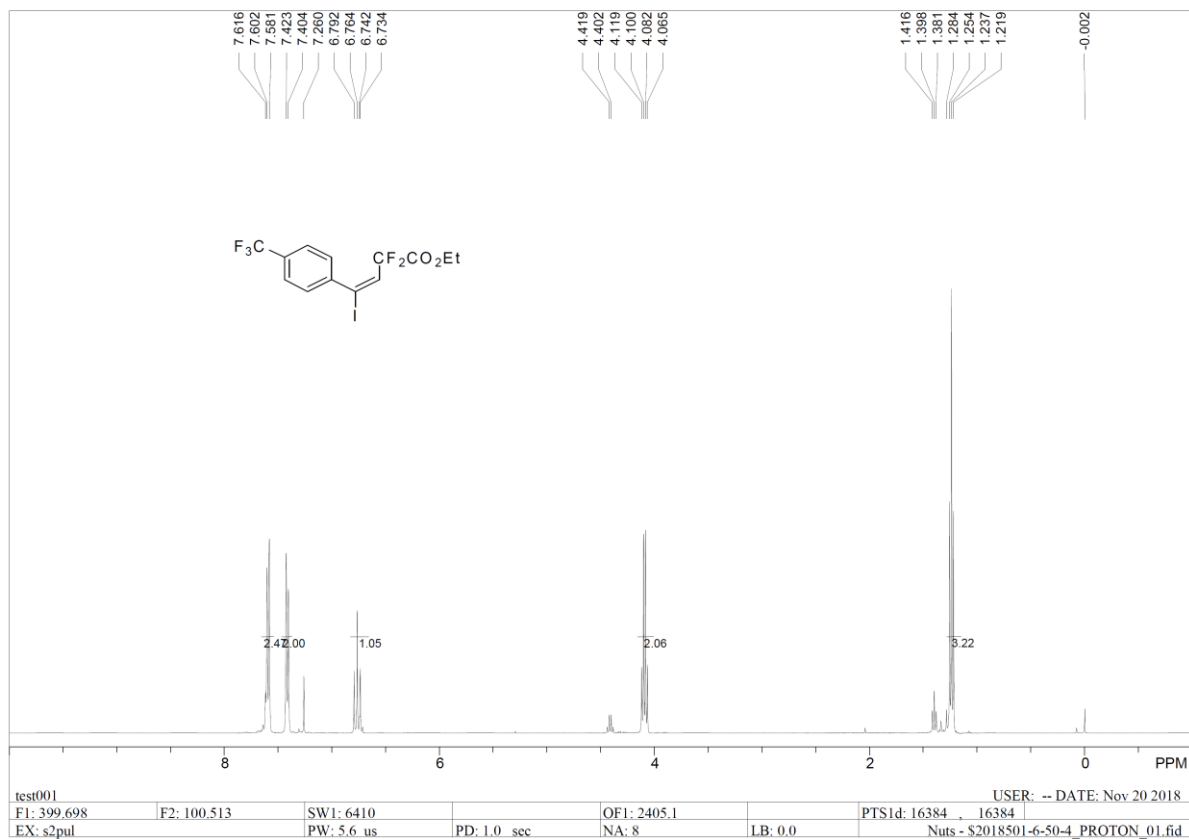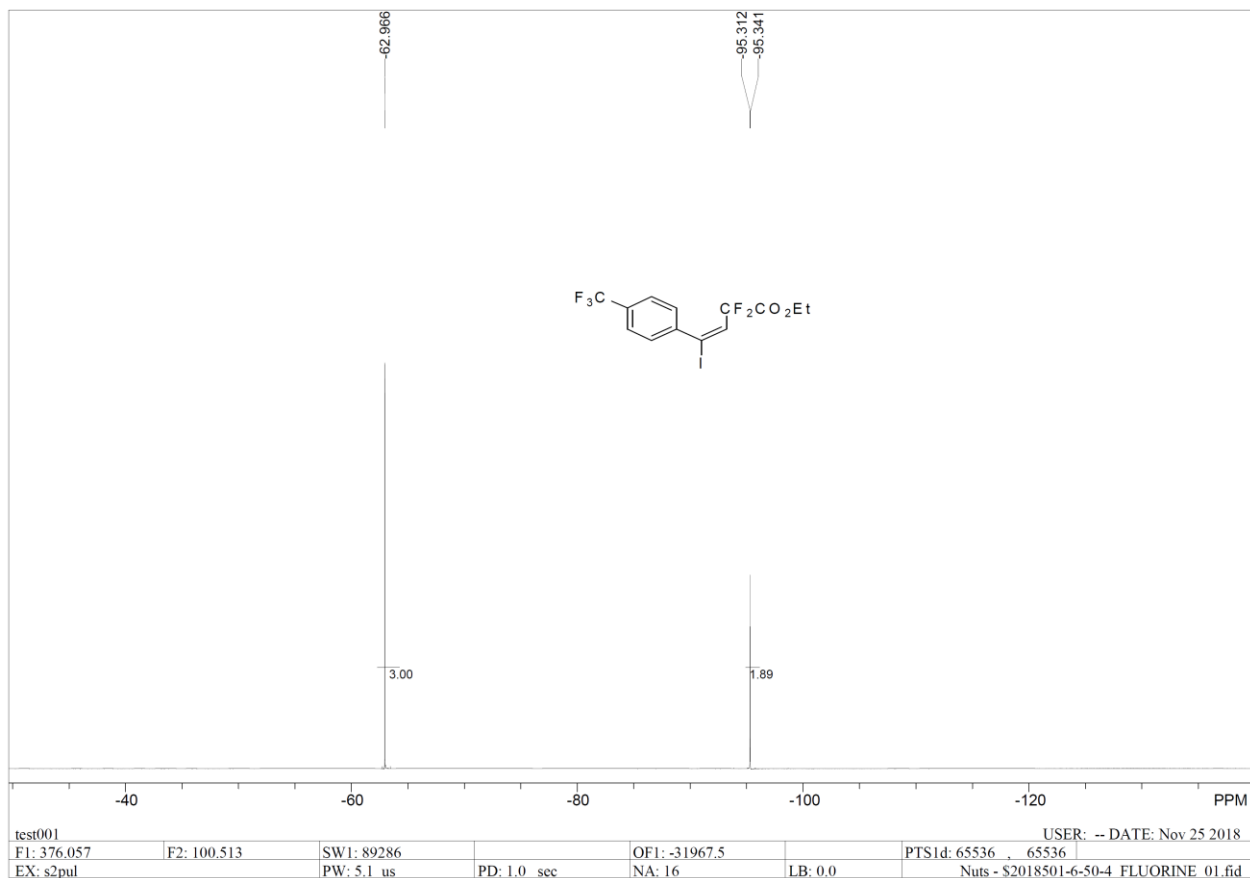

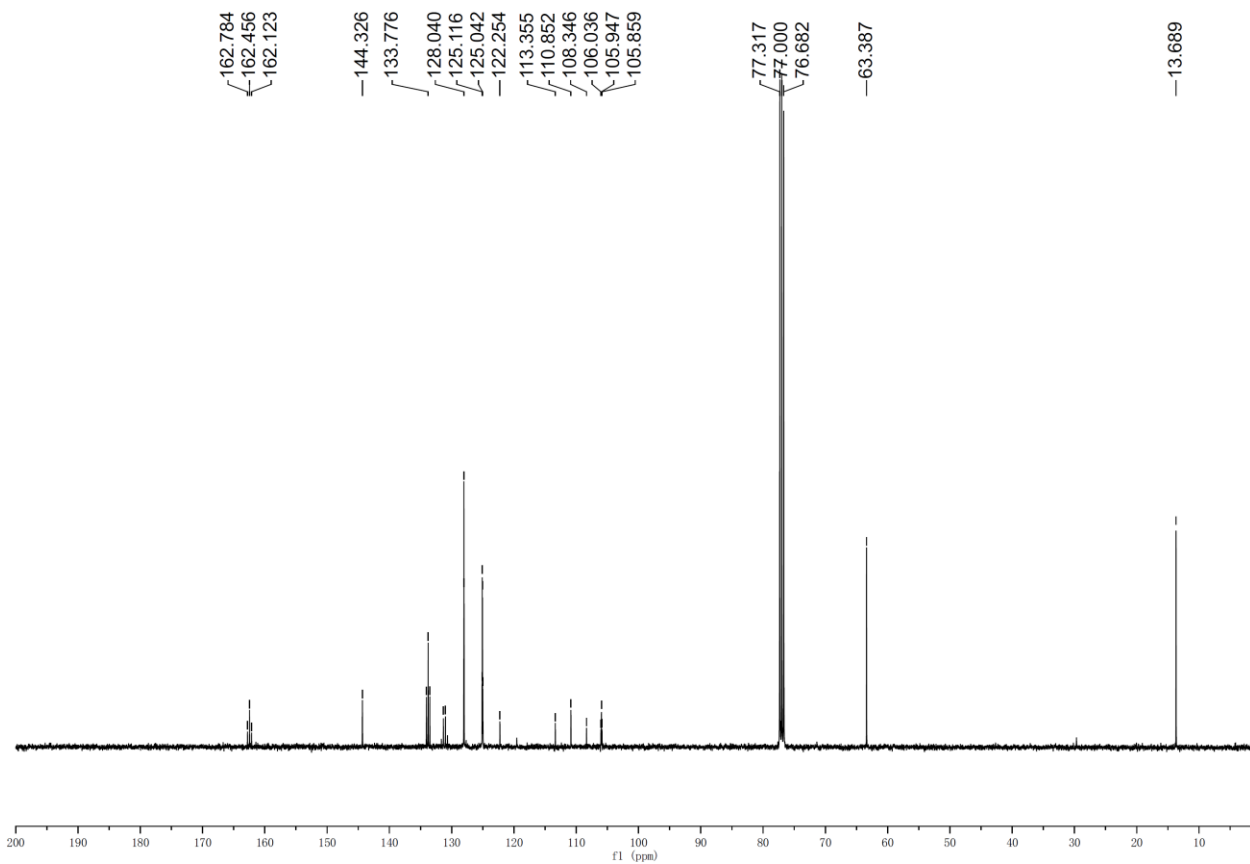

**Ethyl (E)-2,2-difluoro-4-iodo-4-(3-methoxyphenyl)but-3-enoate (5h).**

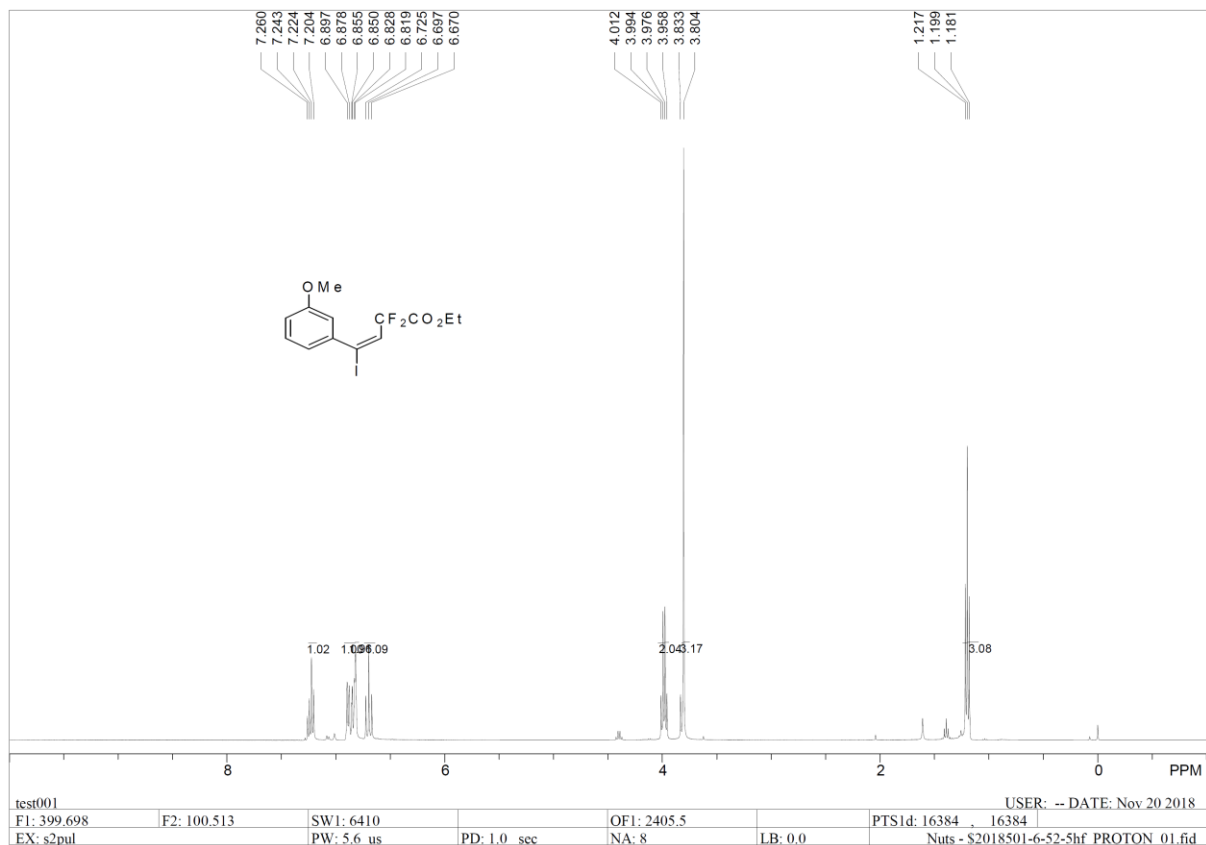

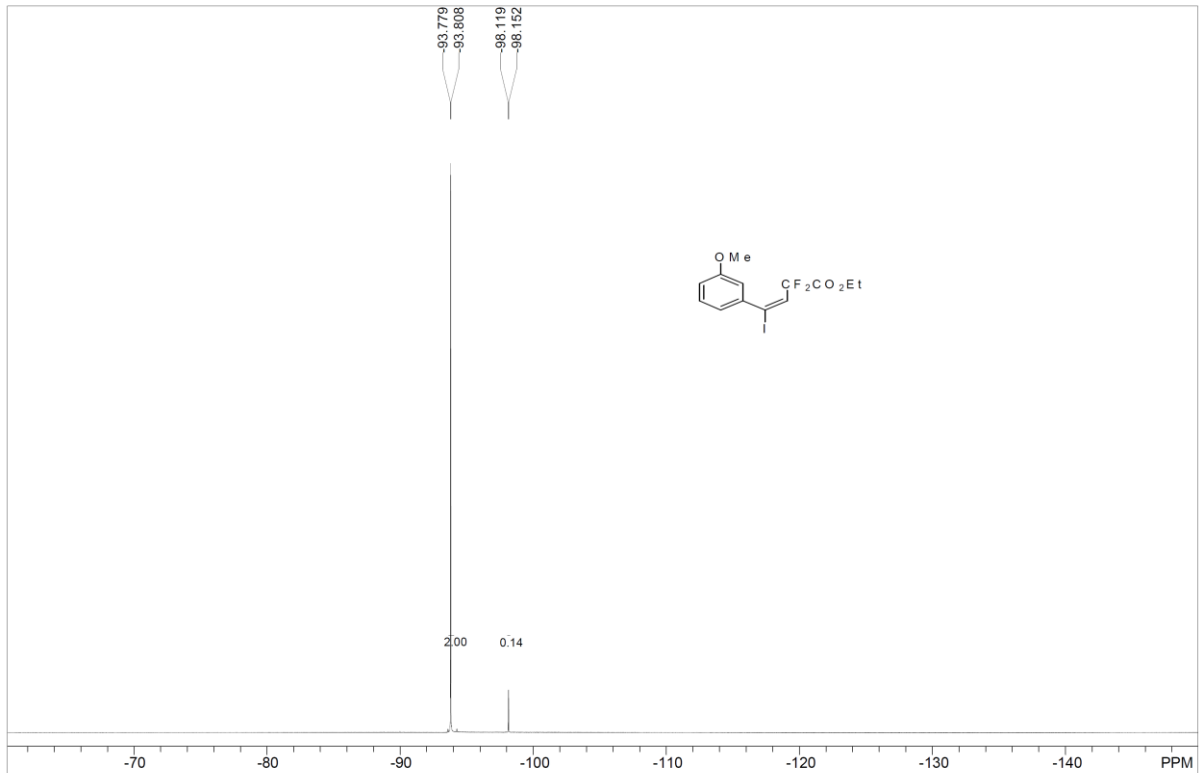

|             |             |             |               |              |                                          |                            |  |
|-------------|-------------|-------------|---------------|--------------|------------------------------------------|----------------------------|--|
| test001     |             |             |               |              |                                          | USER: -- DATE: Nov 20 2018 |  |
| F1: 376.057 | F2: 100.513 | SW1: 89286  | OF1: -31967.5 | PTS1d: 65536 | 65536                                    |                            |  |
| EX: s2pul   | PW: 5.1 us  | PD: 1.0 sec | NA: 16        | LB: 0.0      | Nuts - S2018501-6-52-5hf_FLUORINE_01.fid |                            |  |

- 162.456
- 158.781
- 141.677
- 132.972
- 132.688
- 129.103
- 120.237
- 115.388
- 113.304
- 113.069
- 110.817
- 108.435
- 108.333
- 108.231
- 77.318
- 77.000
- 76.682
- 63.095
- 55.386
- 55.264
- 13.635

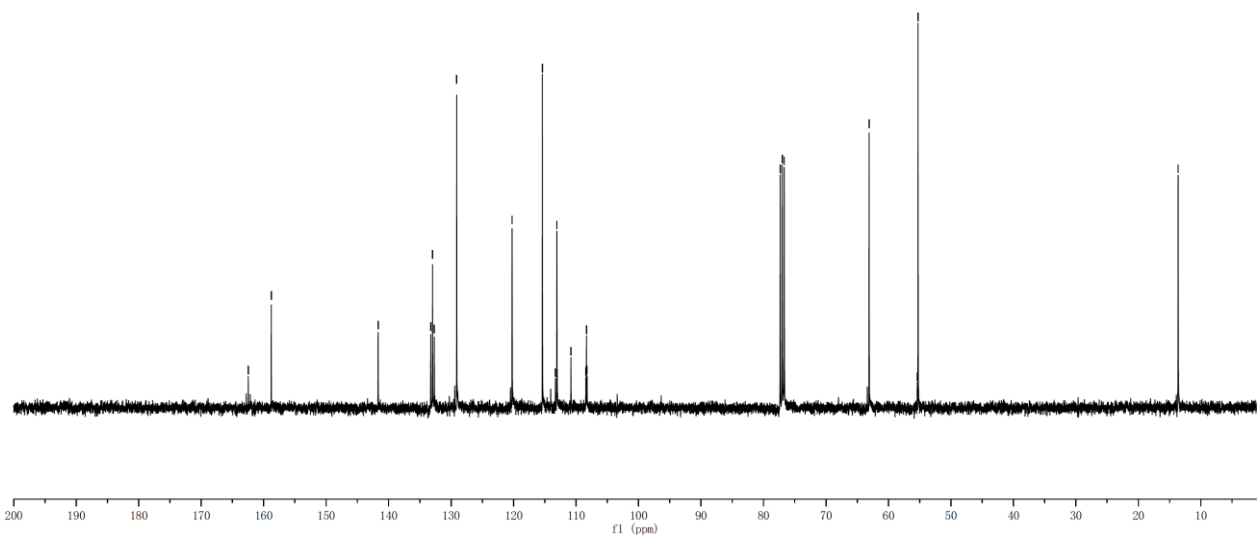

**Methyl (*E*)-3-(4-ethoxy-3,3-difluoro-1-iodo-4-oxobut-1-en-1-yl)benzoate (5i).**

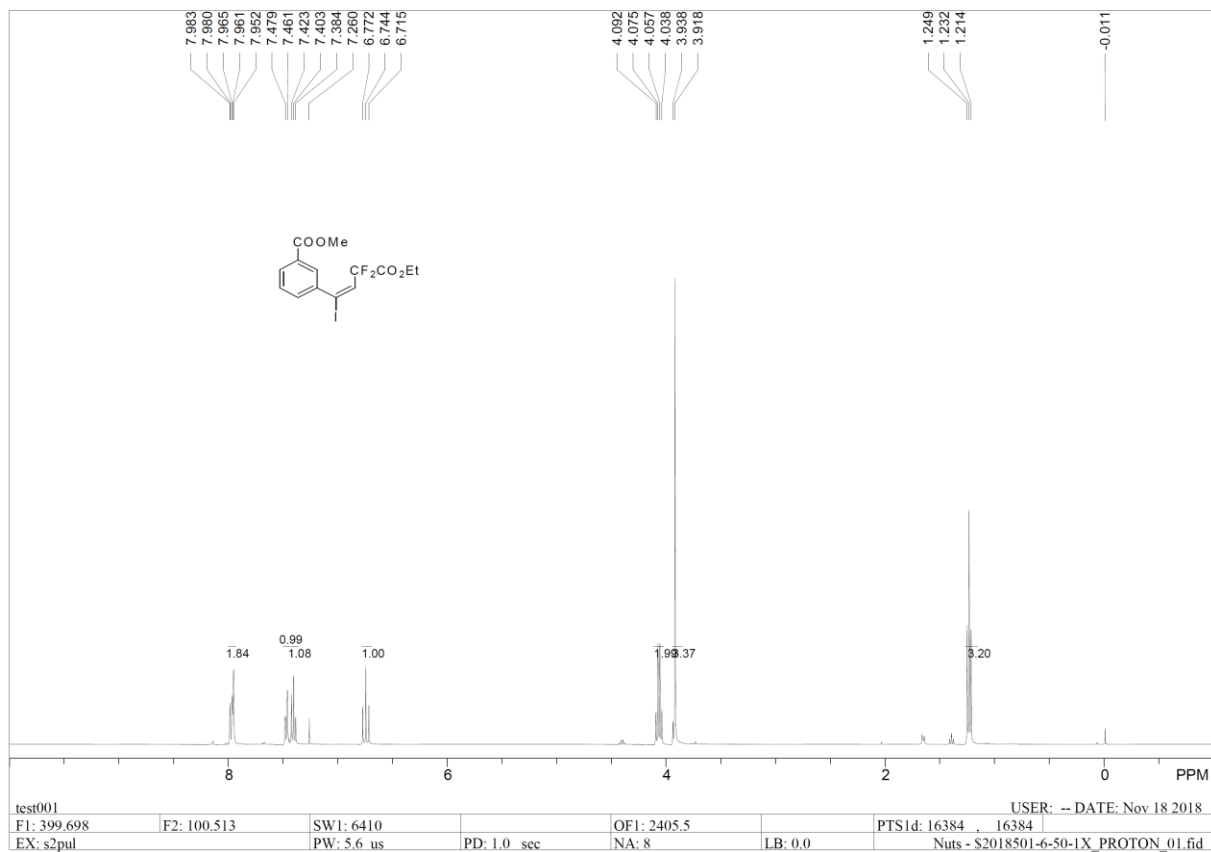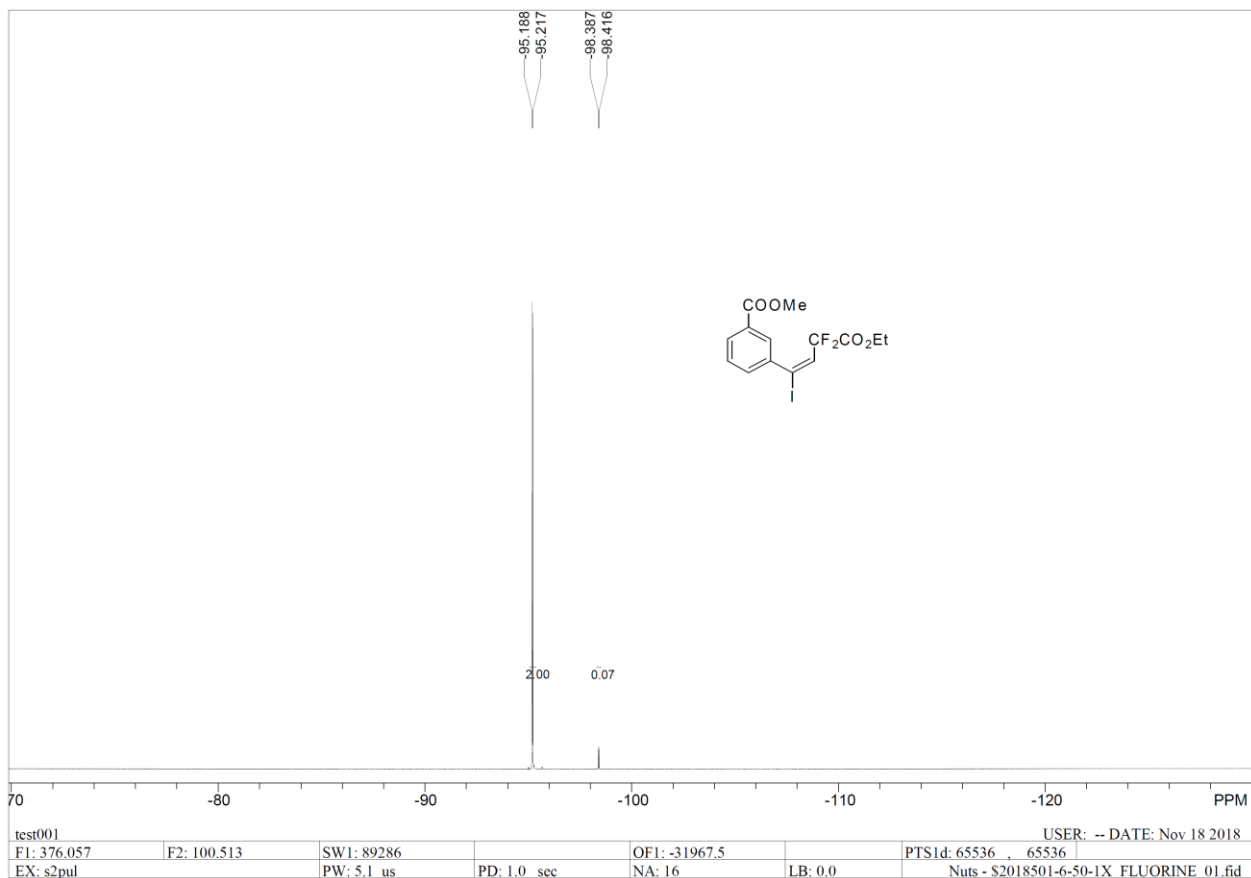

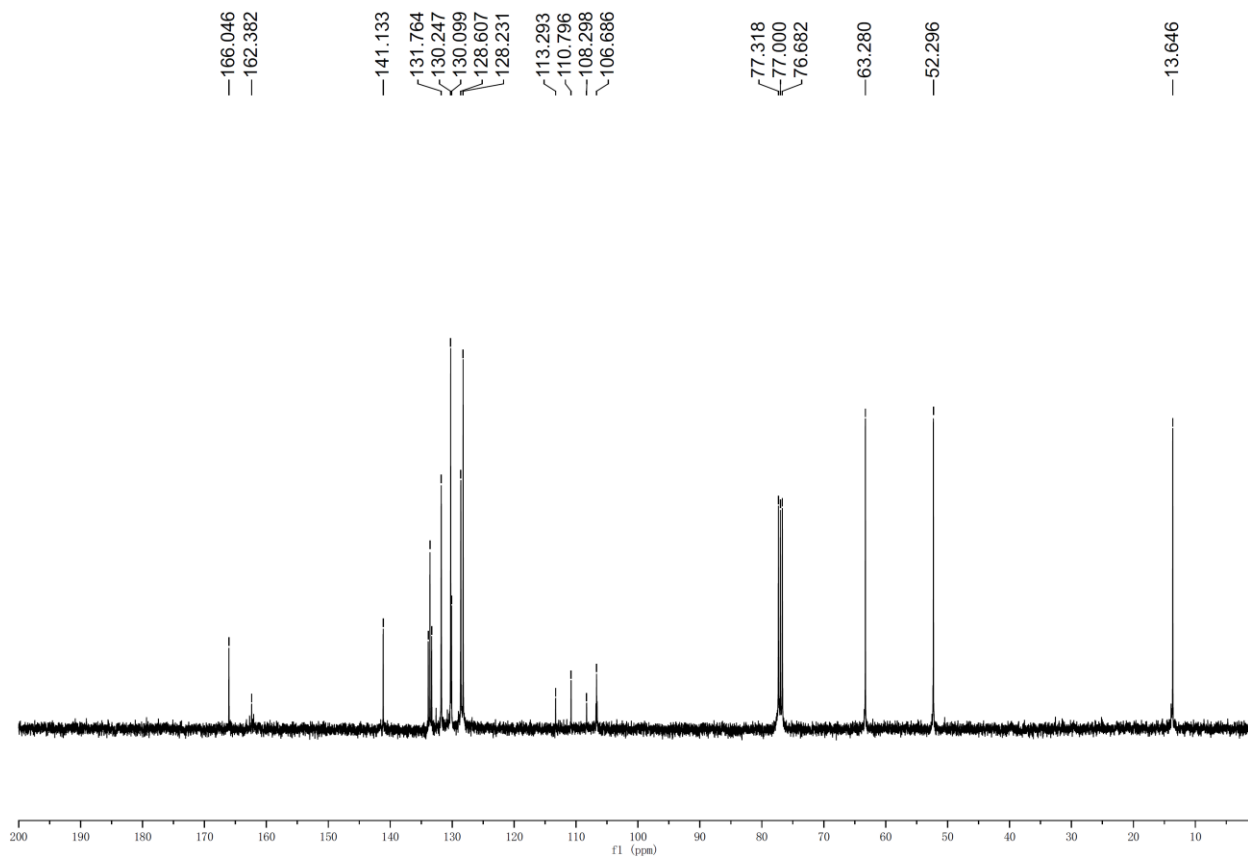

**Ethyl (*E*)-4-(2-chlorophenyl)-2,2-difluoro-4-iodobut-3-enoate (5j).**

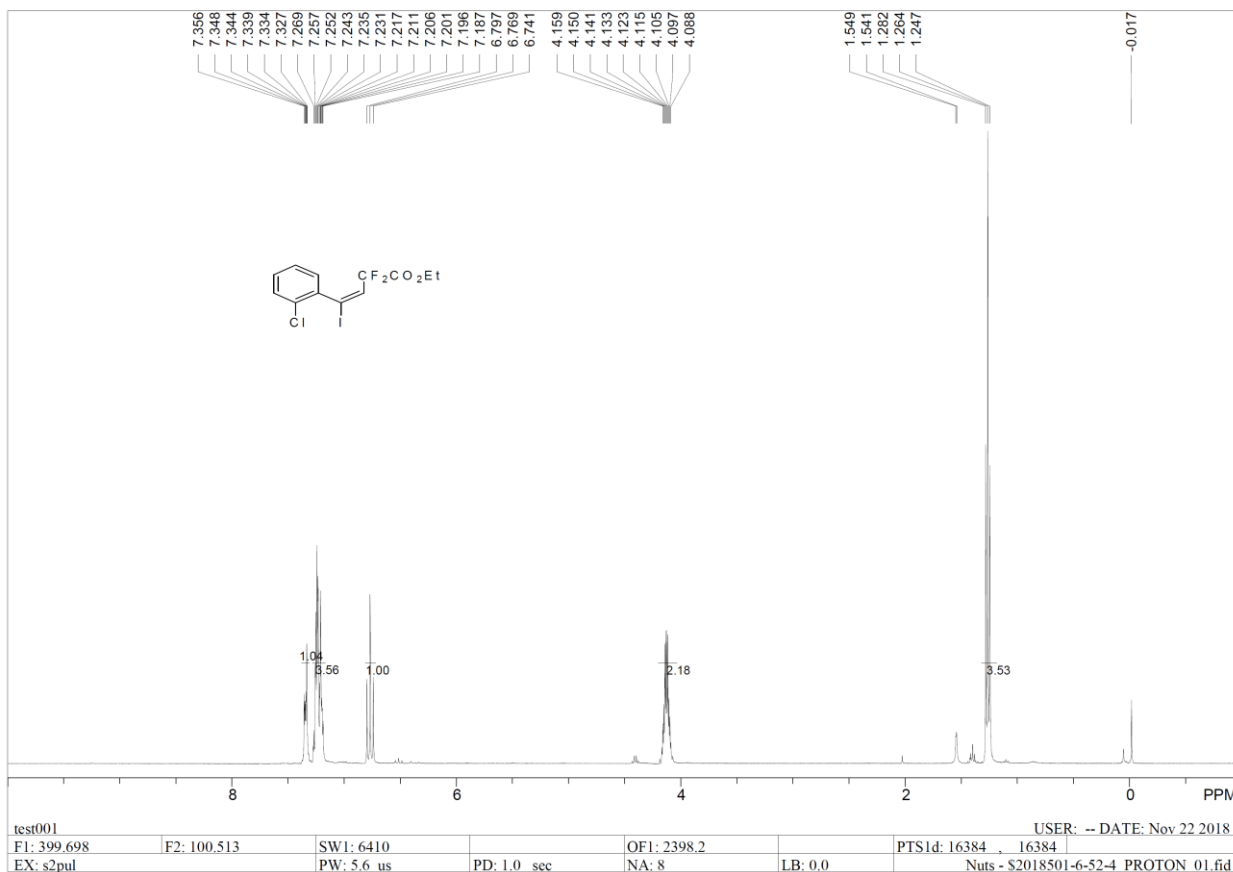

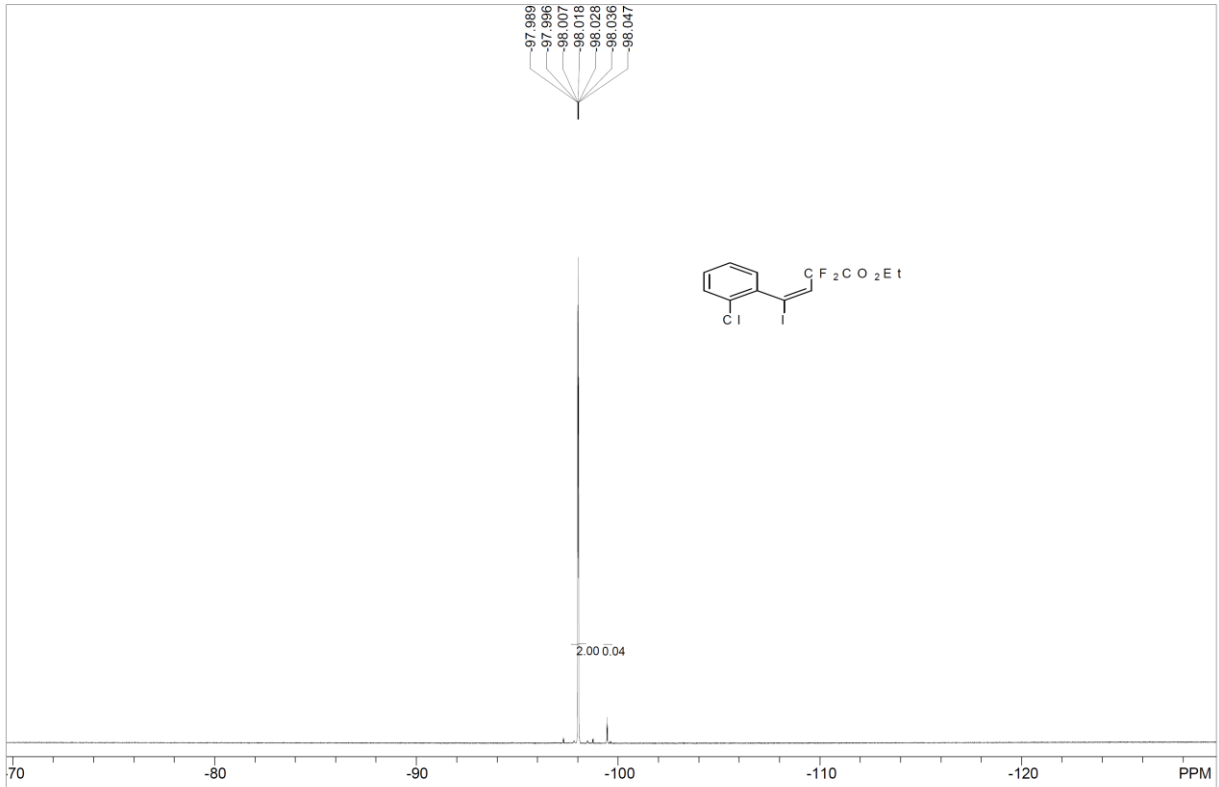

test001  
 F1: 376.057 F2: 100.513 SW1: 89286 OF1: -31967.5 PTS1d: 65536 , 65536 USER: -- DATE: Nov 22 2018  
 EX: s2pul PW: 5.1 us PD: 1.0 sec NA: 16 LB: 0.0 Nuts - S2018501-6-52-4\_FLUORINE\_01.fid

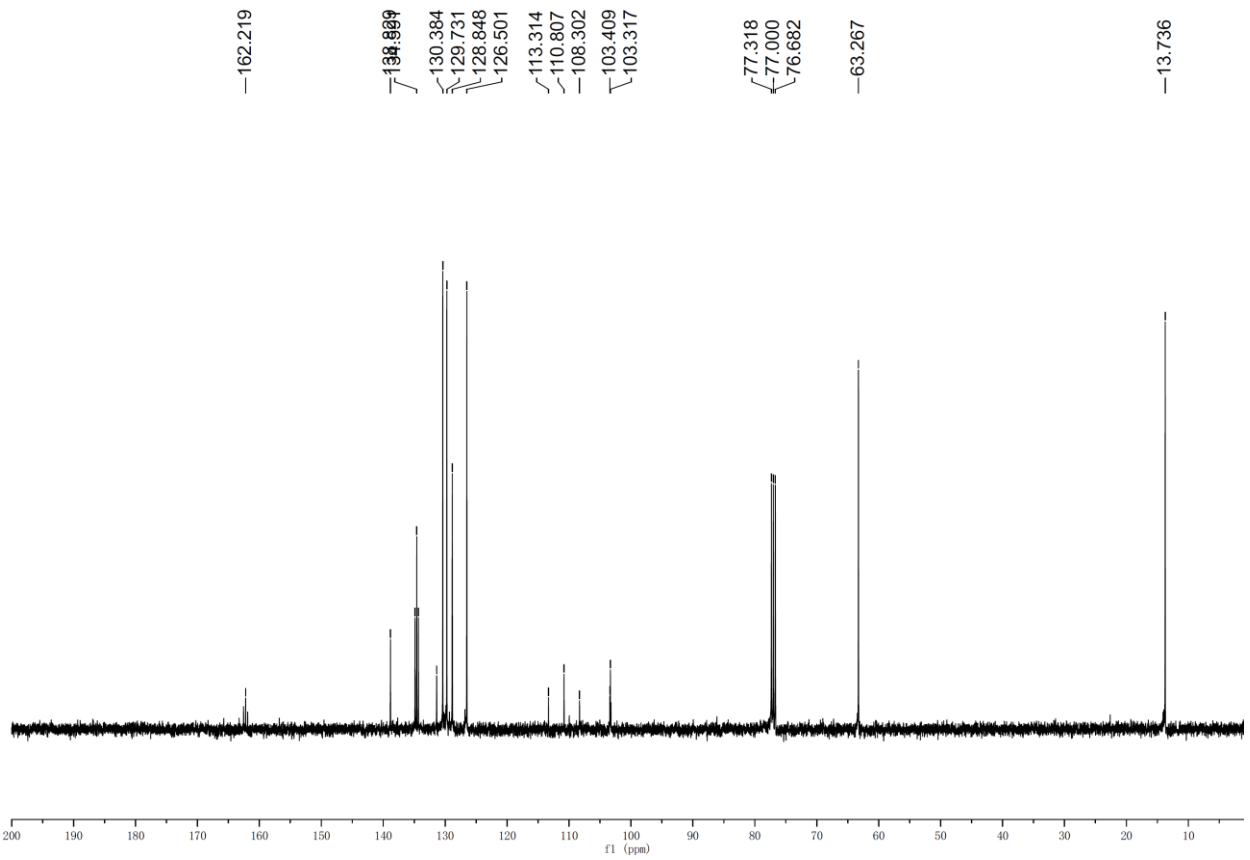

**Ethyl (E)-2,2-difluoro-4-iodo-4-(pyridin-3-yl)but-3-enoate (5k).**

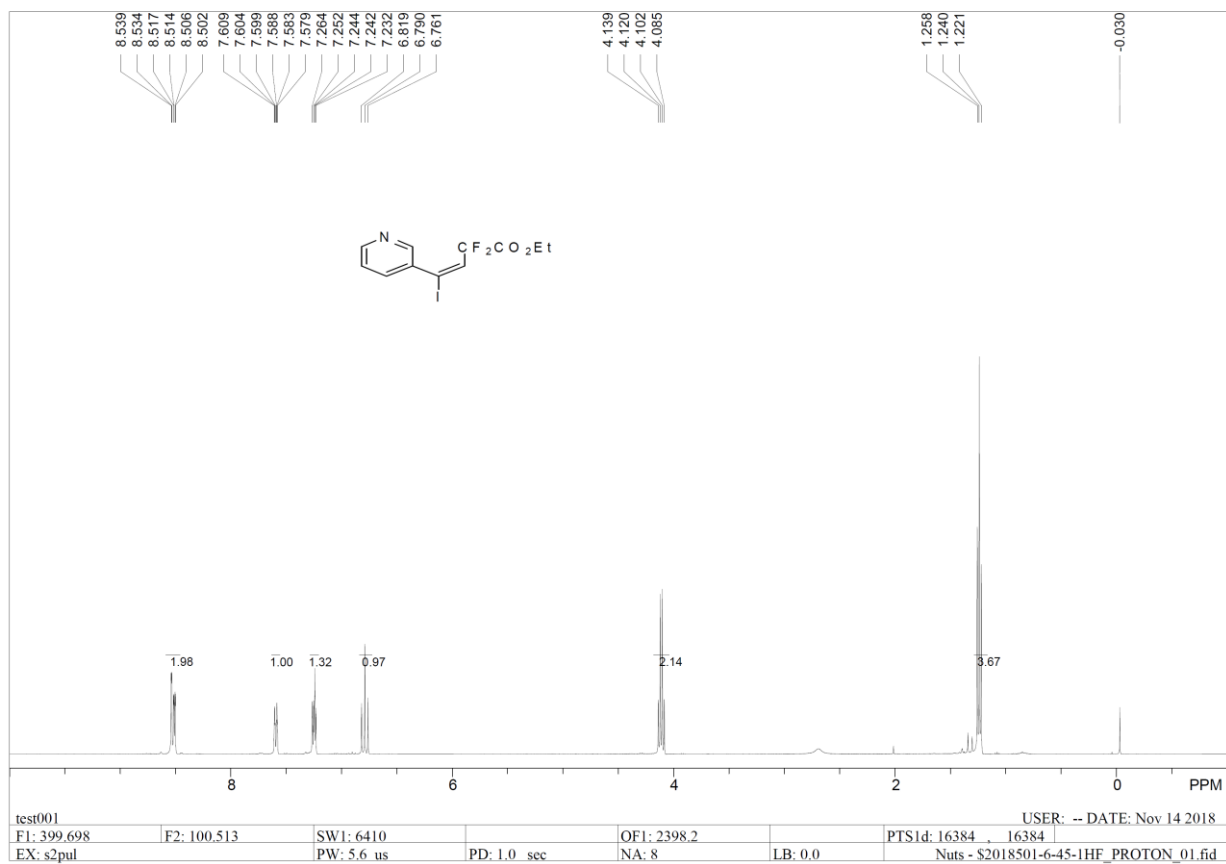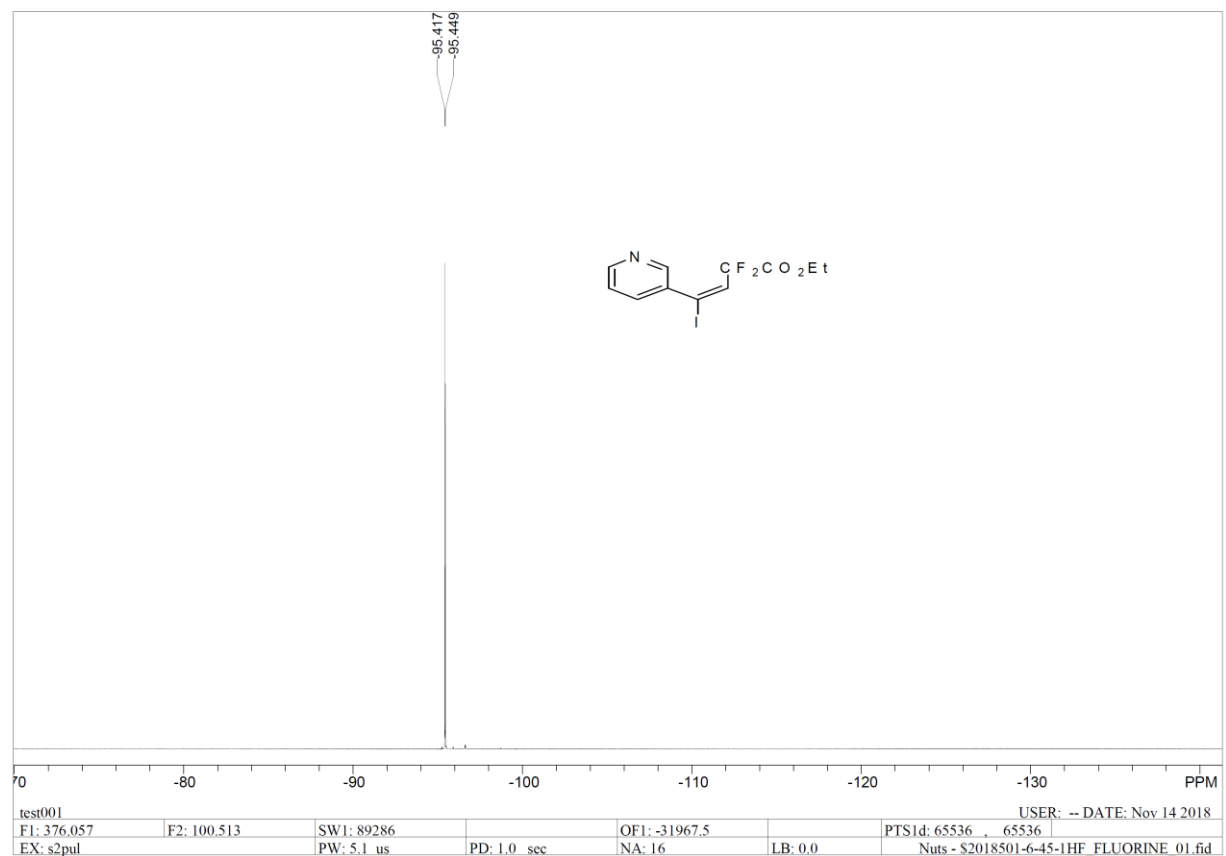

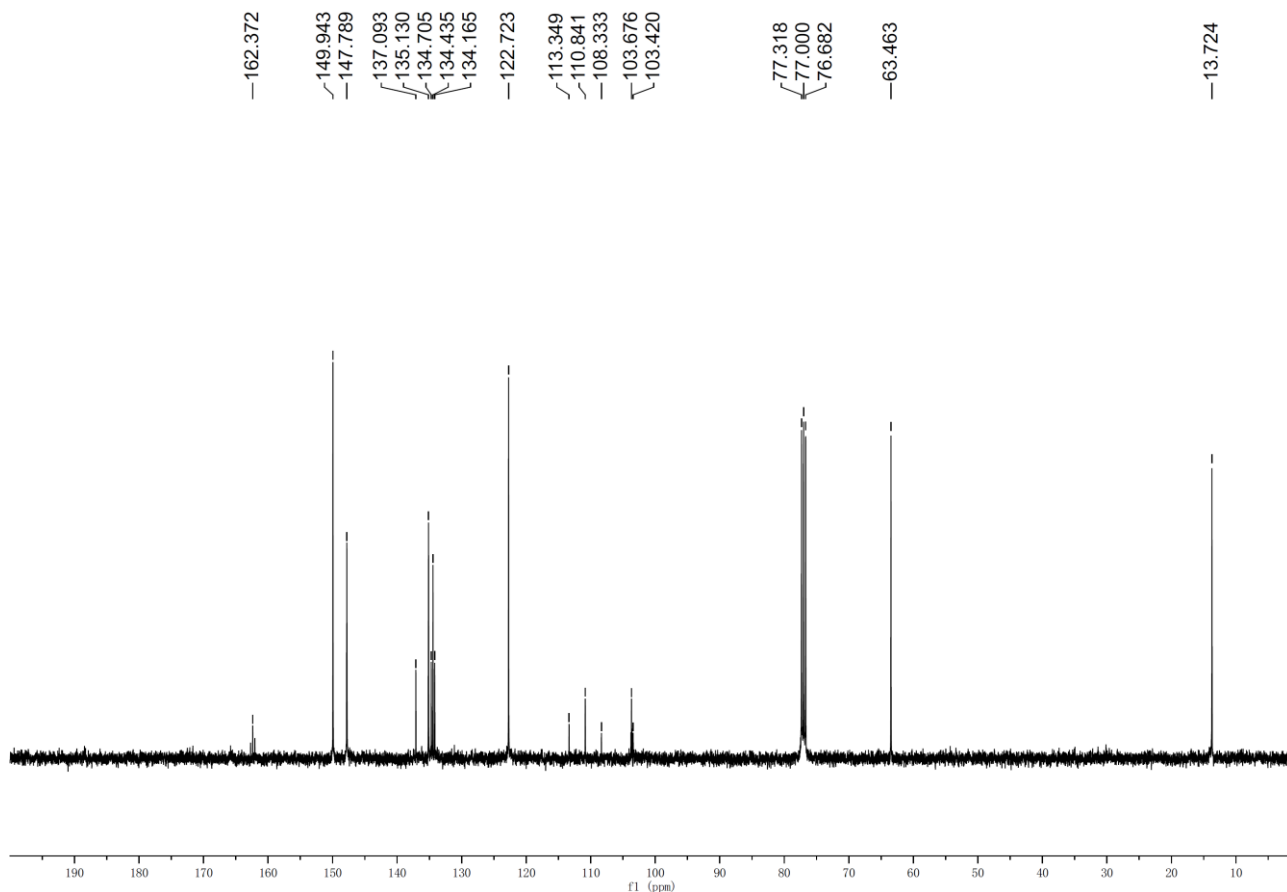

**(E)-1-Methoxy-4-(3,3,4,4,5,5,6,6,6-nonafluoro-1-iodohex-1-en-1-yl)benzene (5l).**

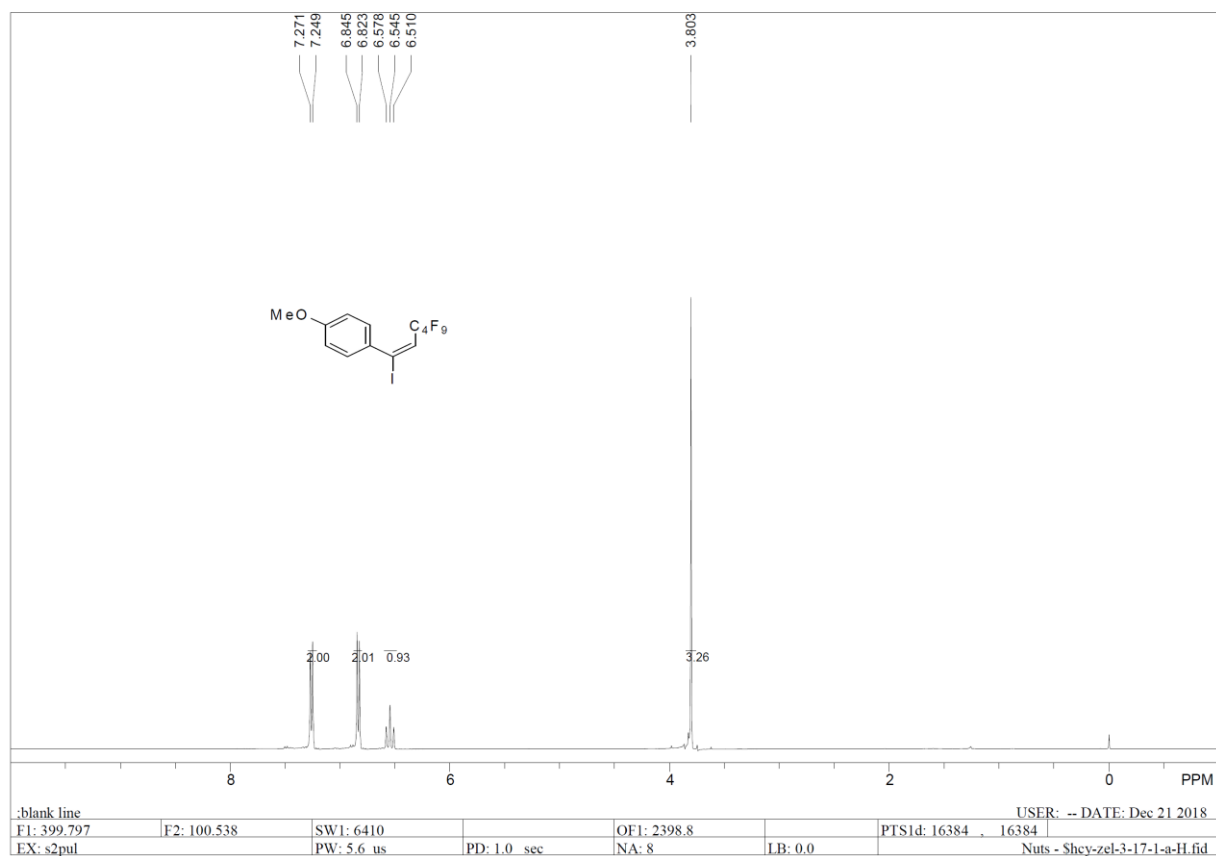



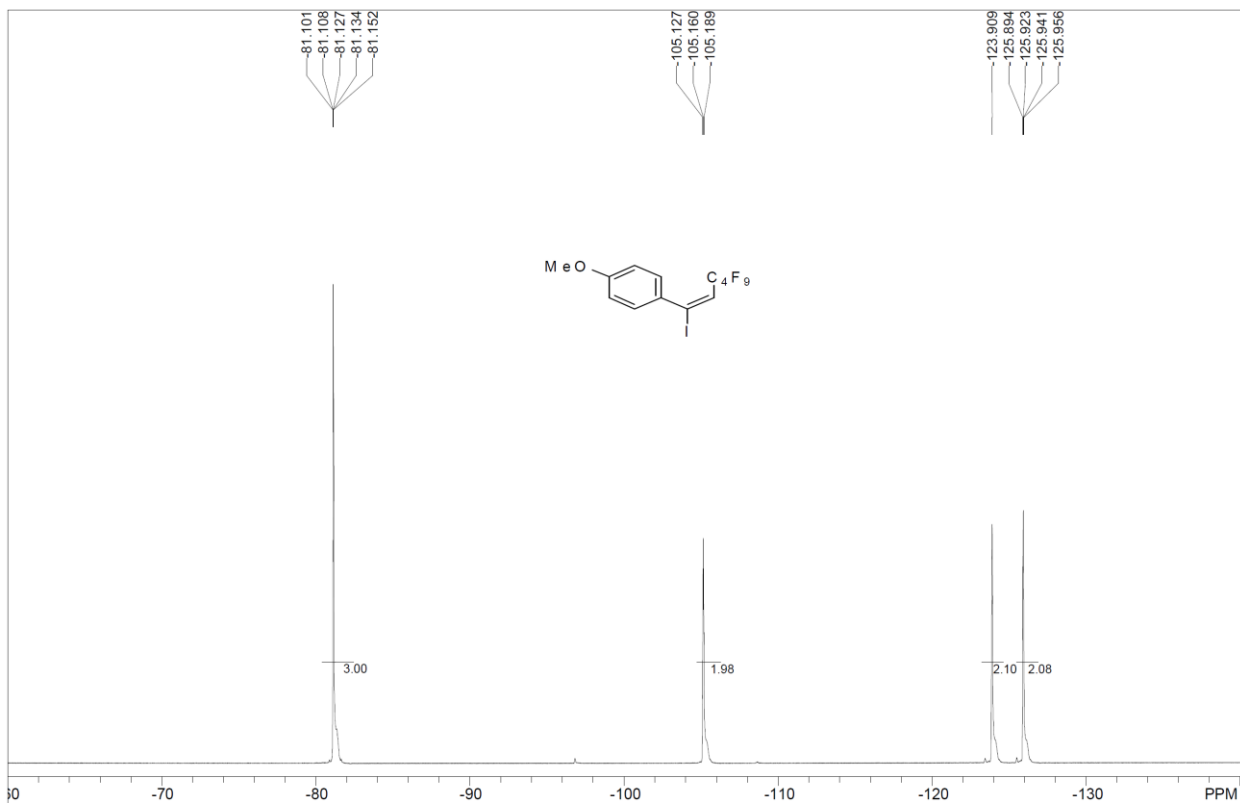

| STANDARD FLUORINE PARAMETERS |             |             |               |              |                                | USER: -- DATE: Dec 24 2018 |
|------------------------------|-------------|-------------|---------------|--------------|--------------------------------|----------------------------|
| F1: 376.151                  | F2: 100.538 | SW1: 89286  | OF1: -31975.5 | PTS1d: 65536 | 65536                          |                            |
| EX: s2pul                    | PW: 3.2 us  | PD: 1.0 sec | NA: 4         | LB: 0.0      | Nuts - Shcy-zel-3-17-1-a-F.fid |                            |

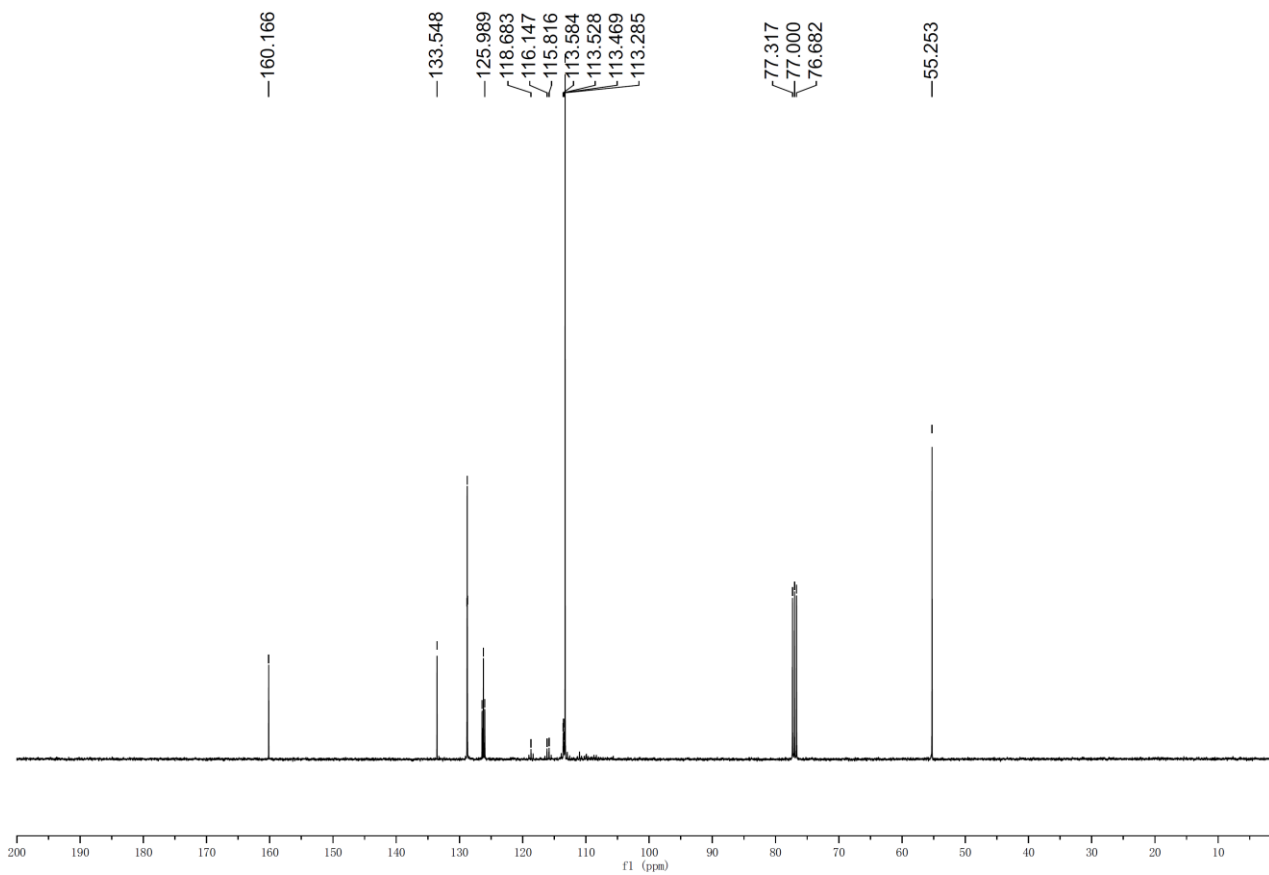

**(E)-5,5,6,6,7,7,8,8,8-Nonafluoro-3-iodooct-3-en-1-ol (5m).**

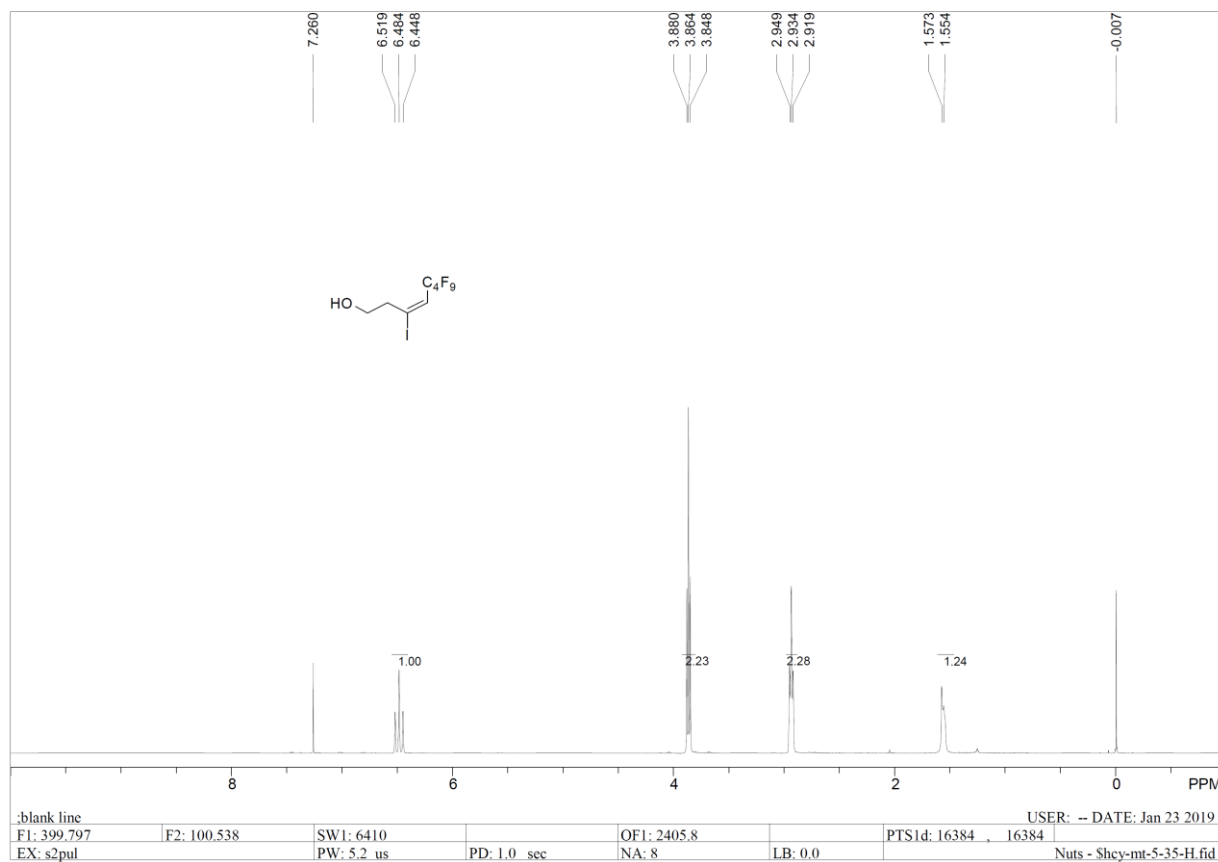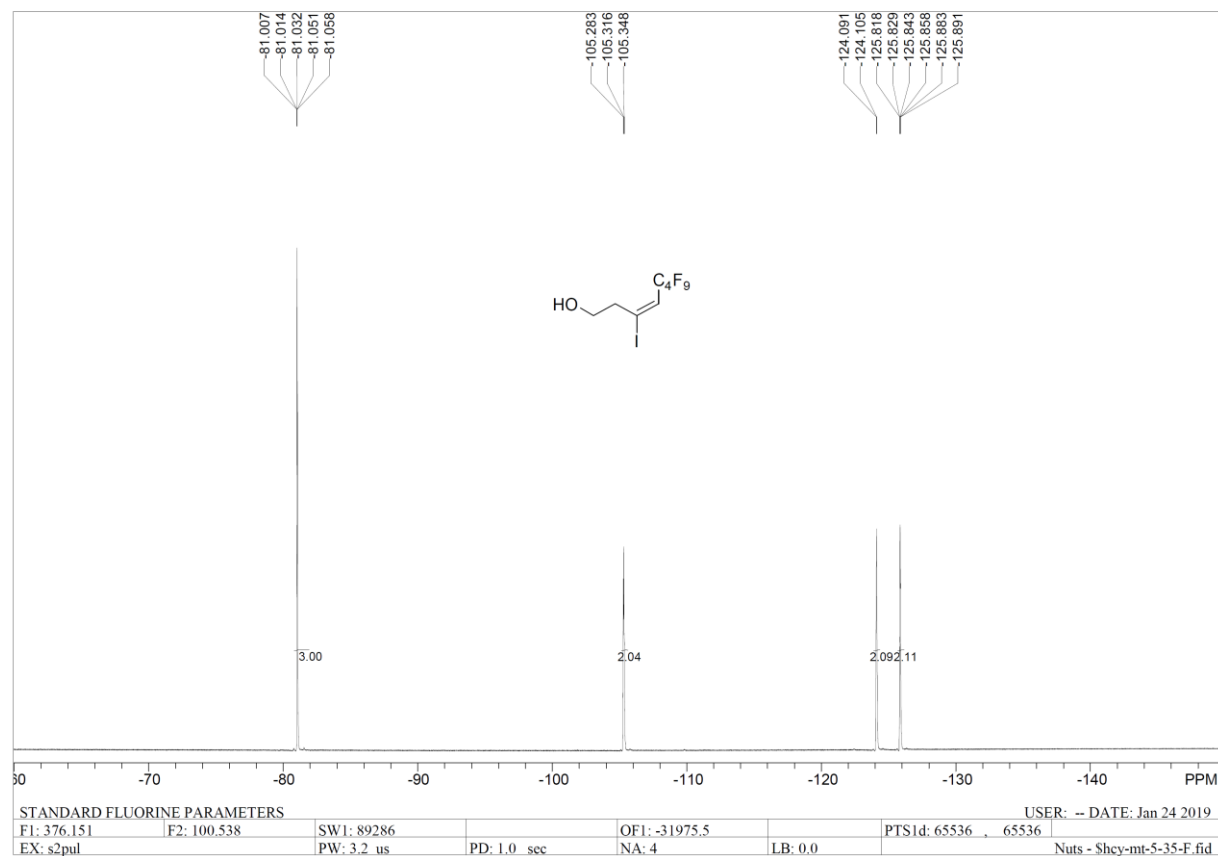

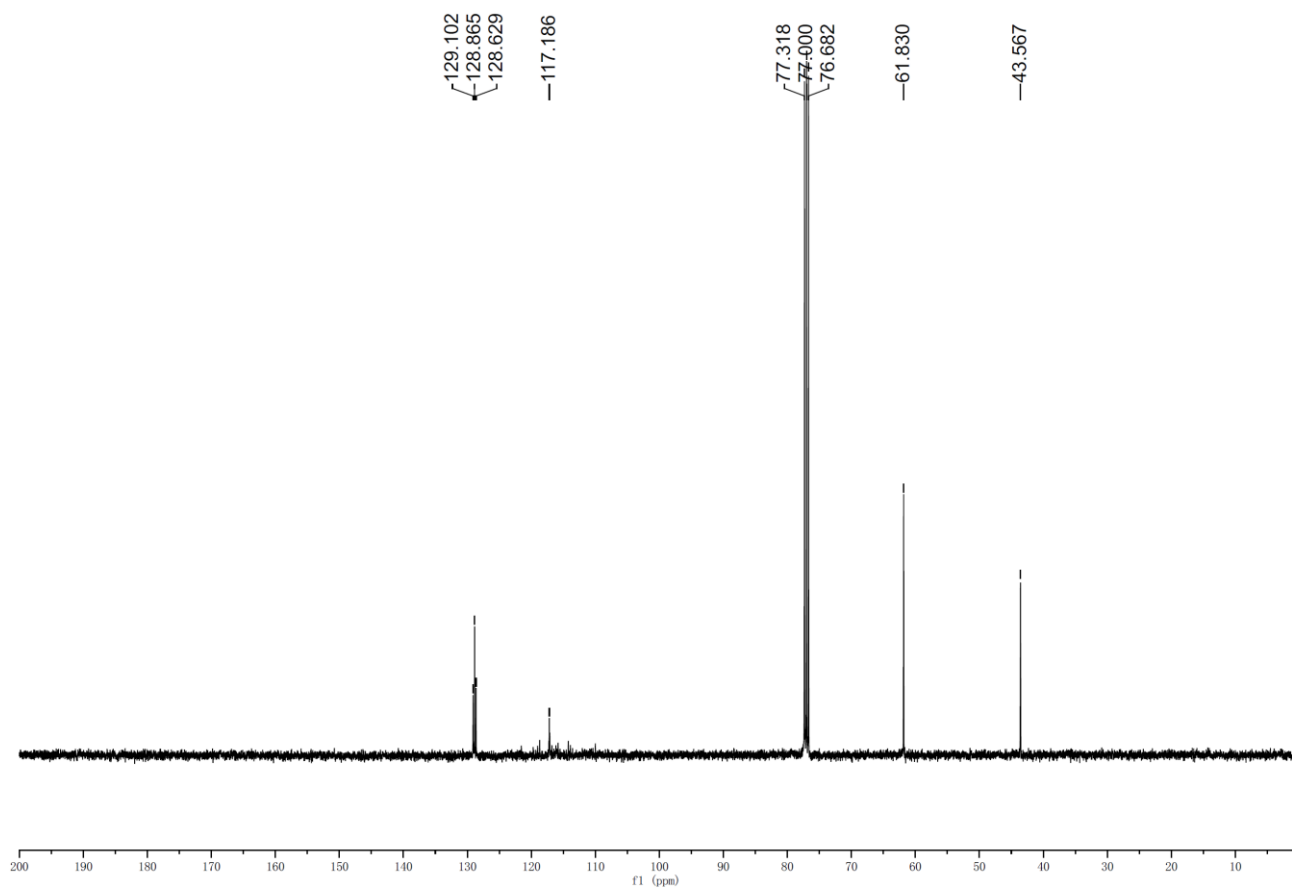

**(E)-1-Methyl-4-(3,3,4,4,5,5,6,6,7,7,8,8,8-tridecafluoro-1-iodooct-1-en-1-yl)benzene (5n).**

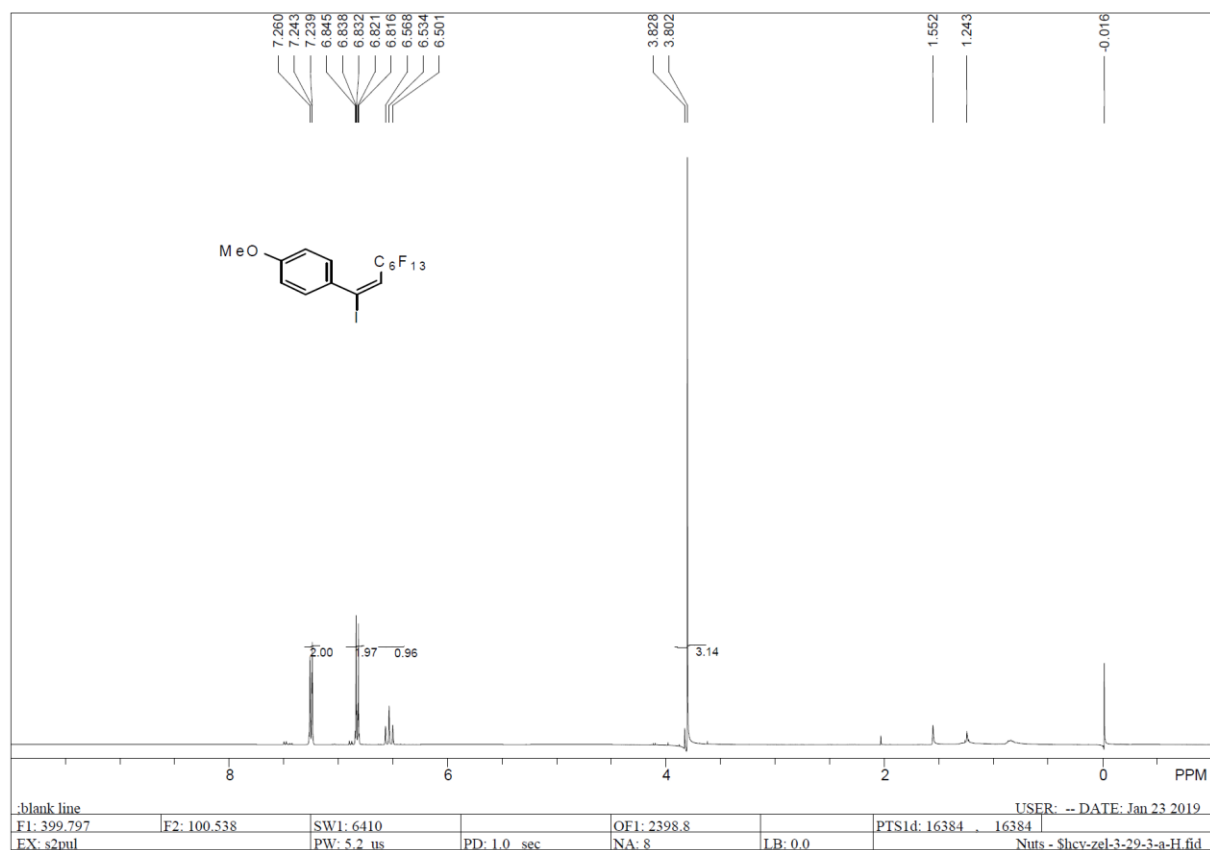

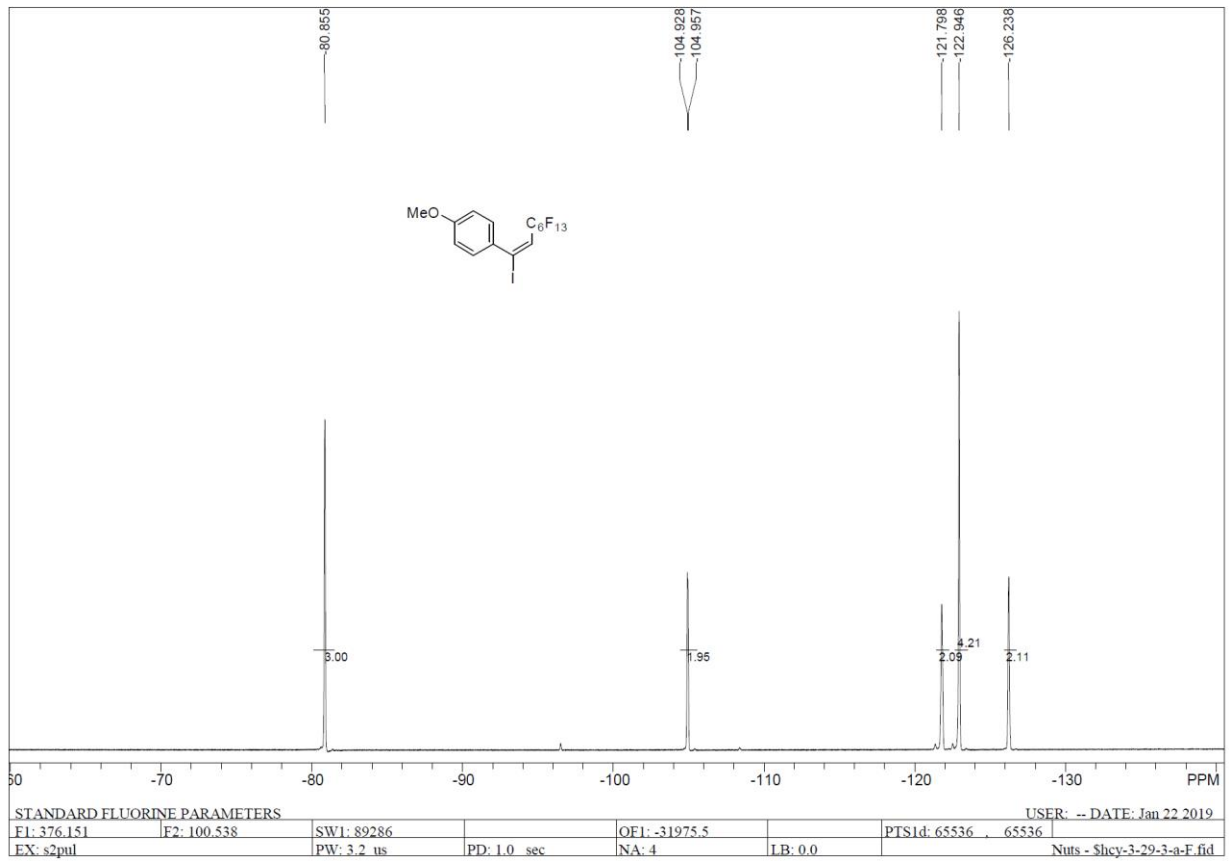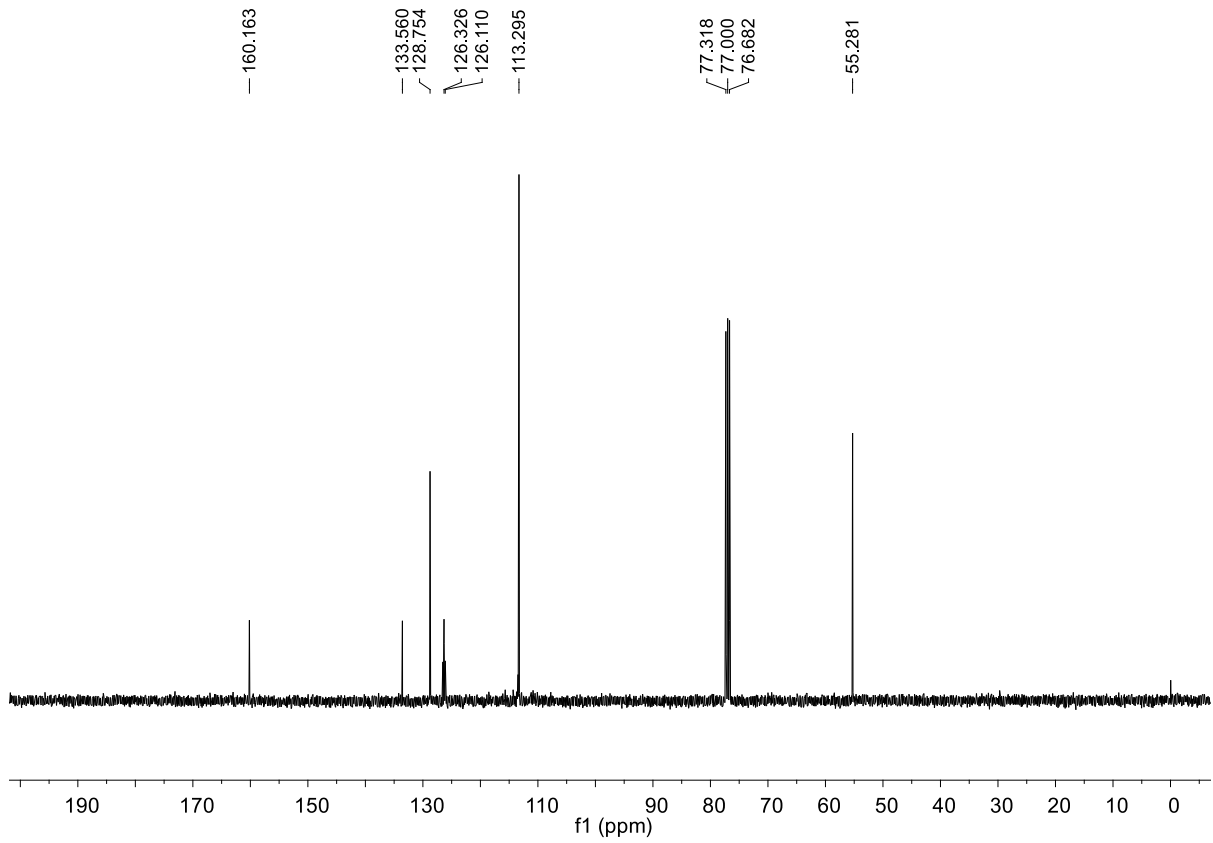

**Ethyl (E)-2,2-difluoro-5-phenylpent-3-enoate (6a).**

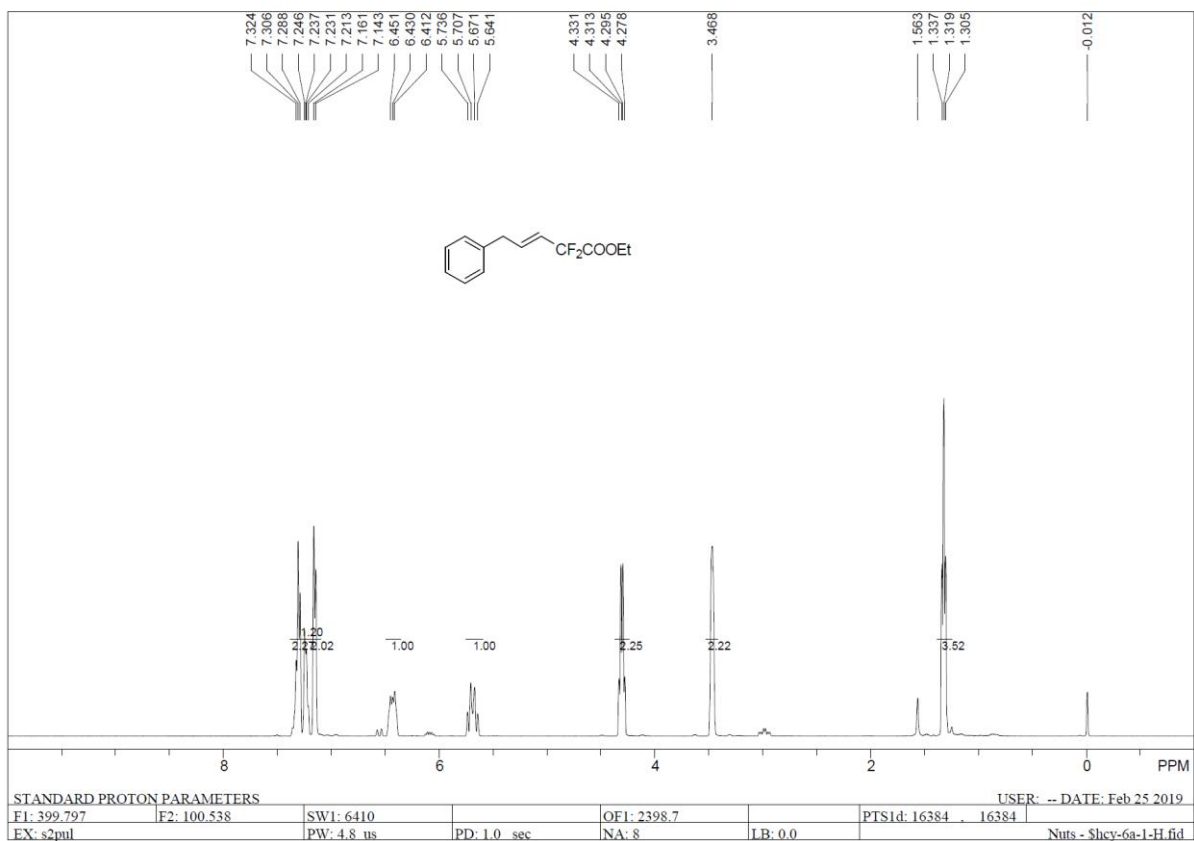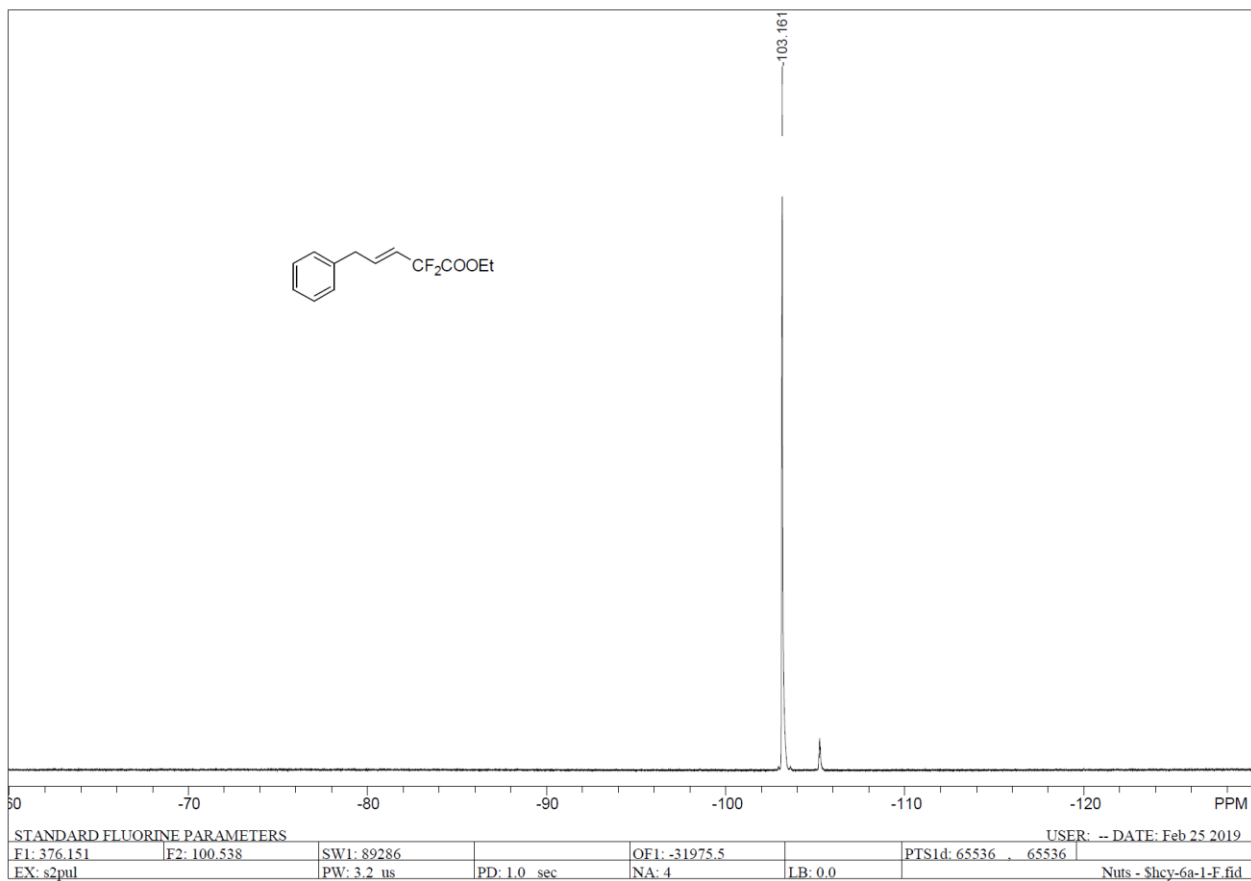

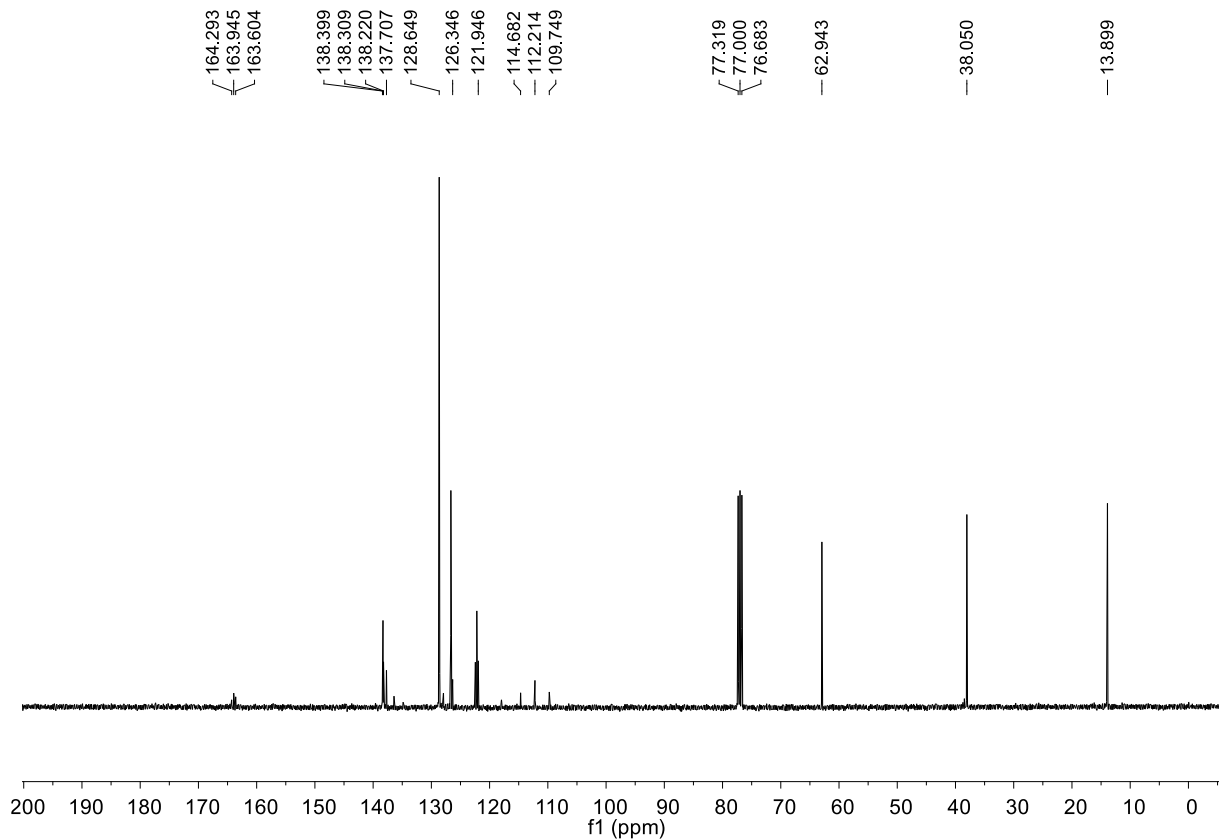

**Ethyl (*E*)-2,2-difluoro-5-(4-methoxyphenyl)pent-3-enoate (6b).**

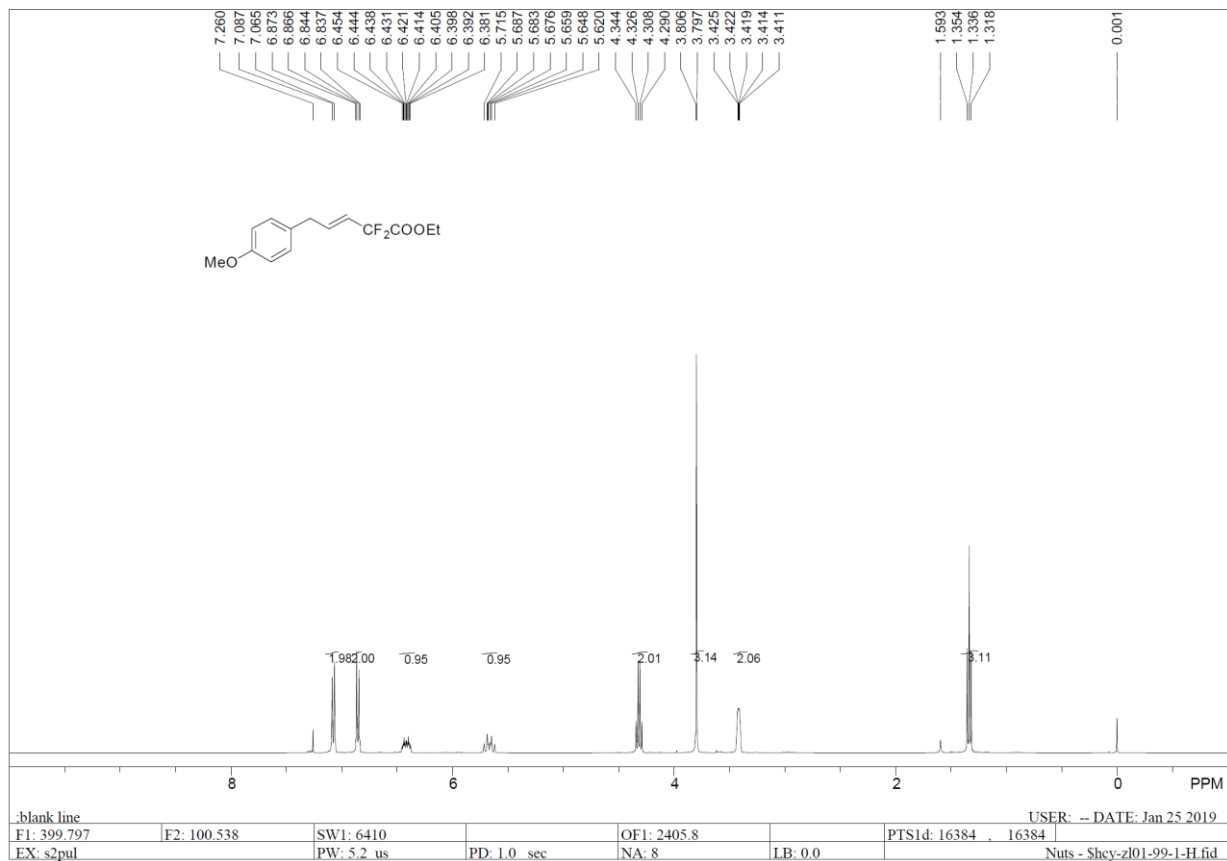

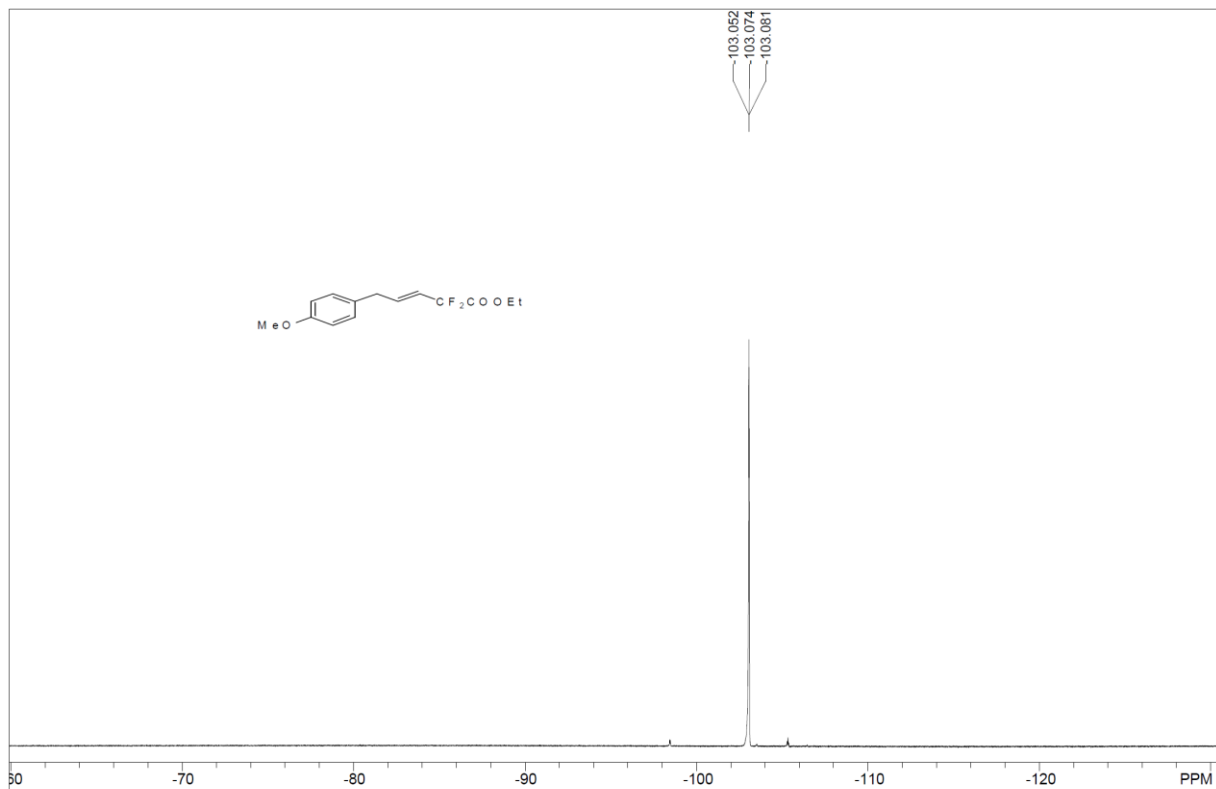

STANDARD FLUORINE PARAMETERS  
 F1: 376.151 F2: 100.538 SW1: 89286 OF1: -31975.5 USER: -- DATE: Jan 25 2019  
 EX: s2pul PW: 3.2 us PD: 1.0 sec NA: 4 LB: 0.0 PTS1d: 65536 65536  
 Nuts - Shcy-zlo1-99-1-F.fid

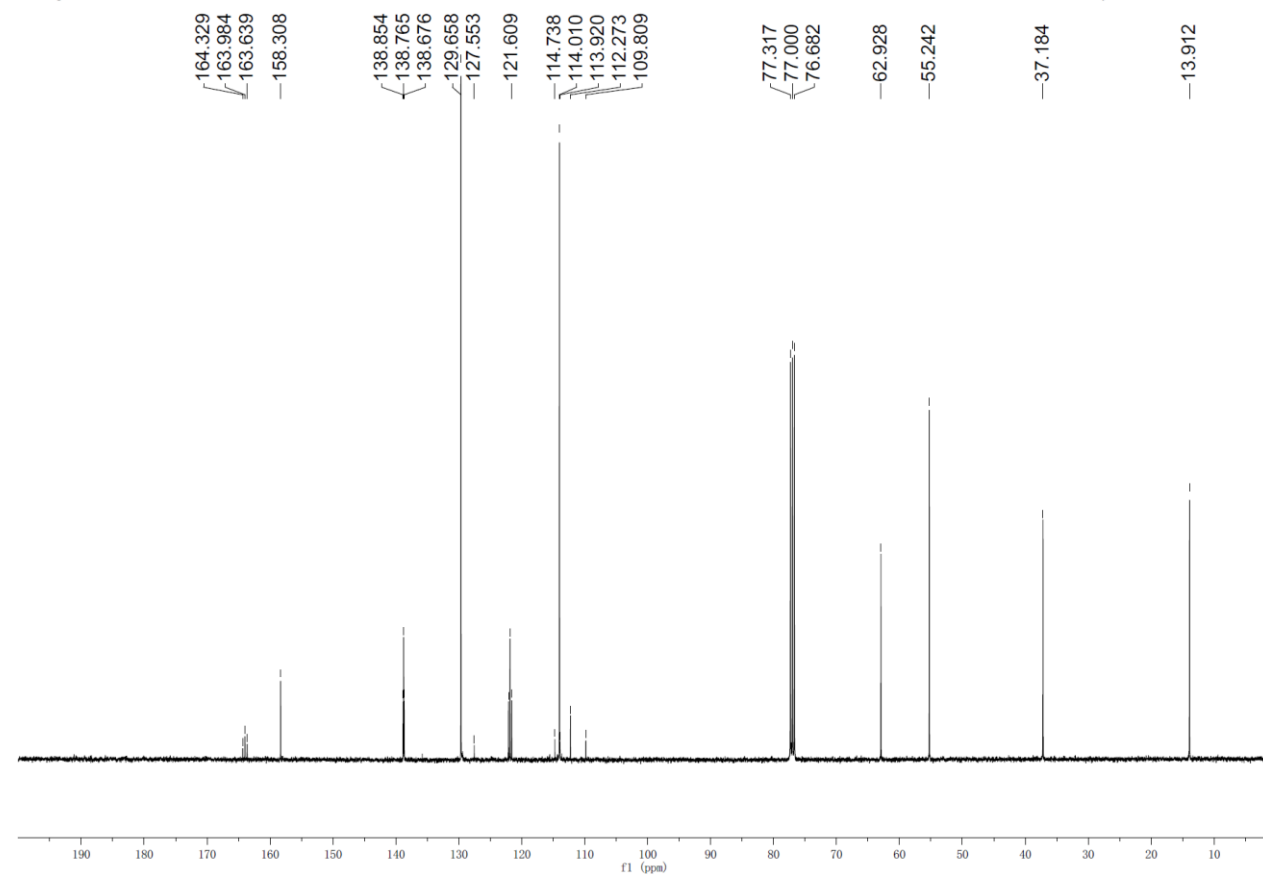

**Ethyl (E)-2,2-difluoro-5-(2-methoxyphenyl)pent-3-enoate (6c).**

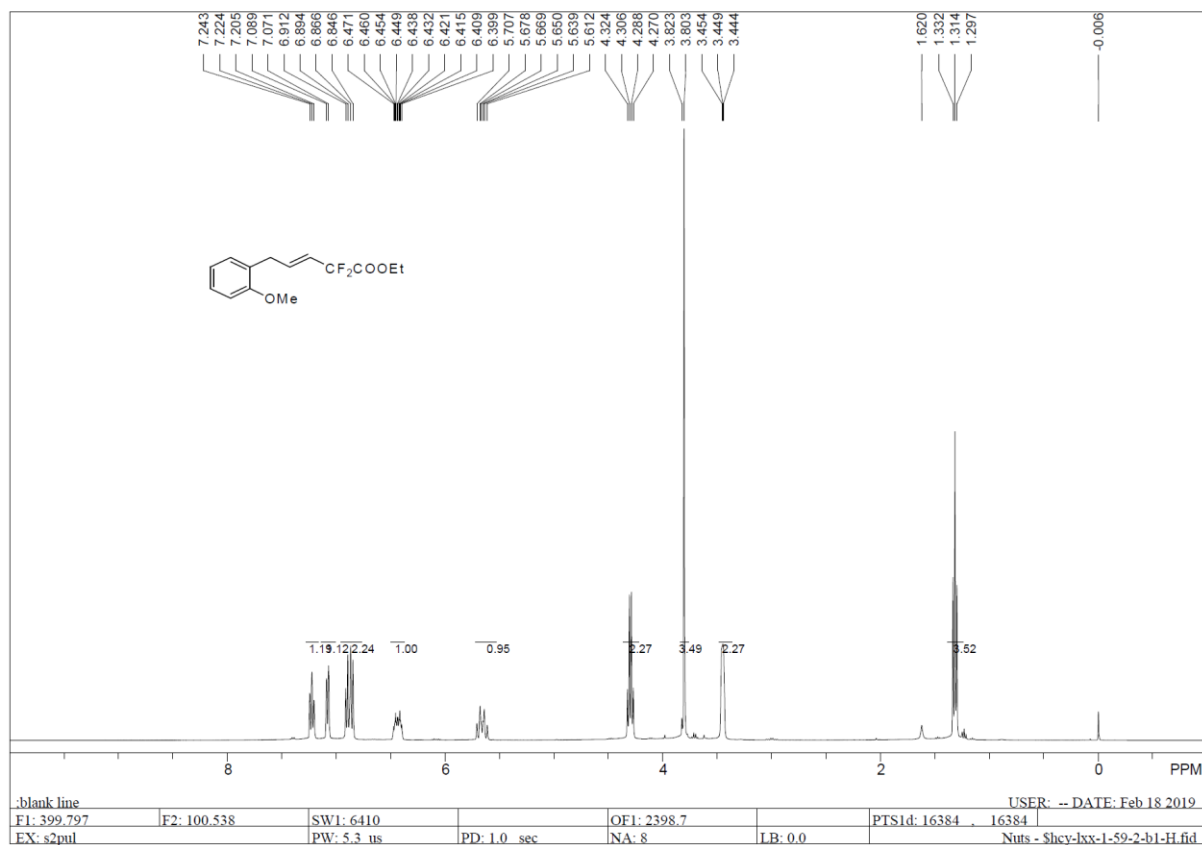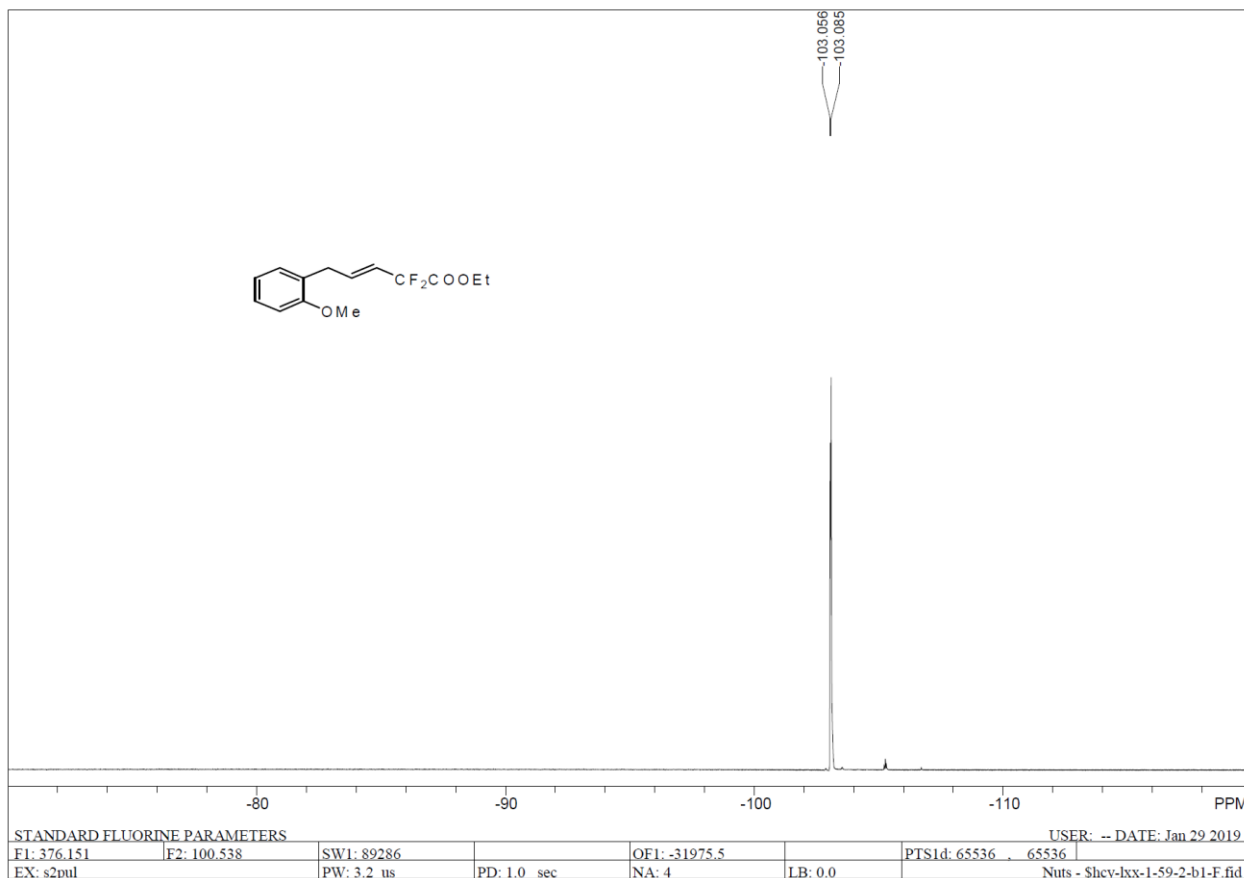



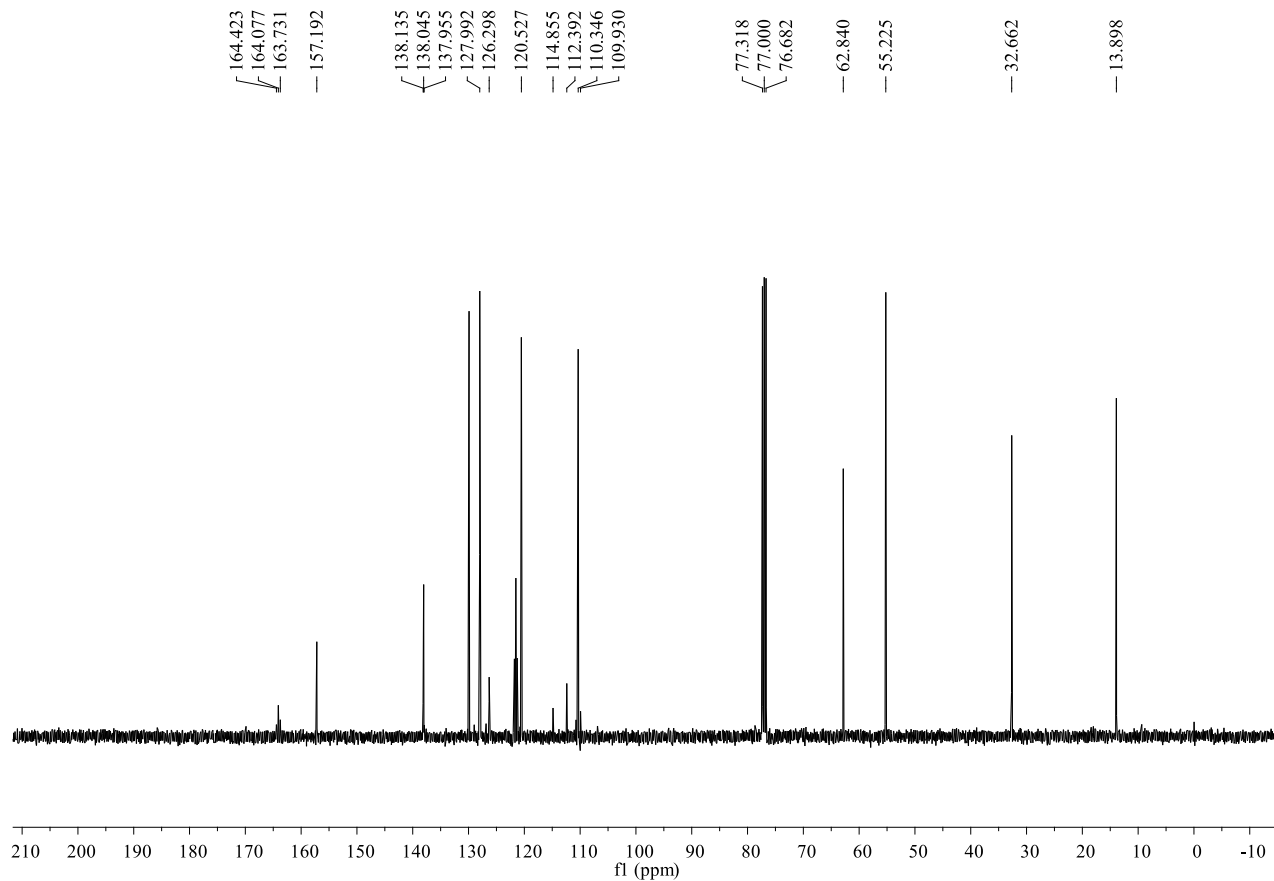

**Ethyl (*E*)-5-(3,4-dimethoxyphenyl)-2,2-difluoropent-3-enoate (6d).**

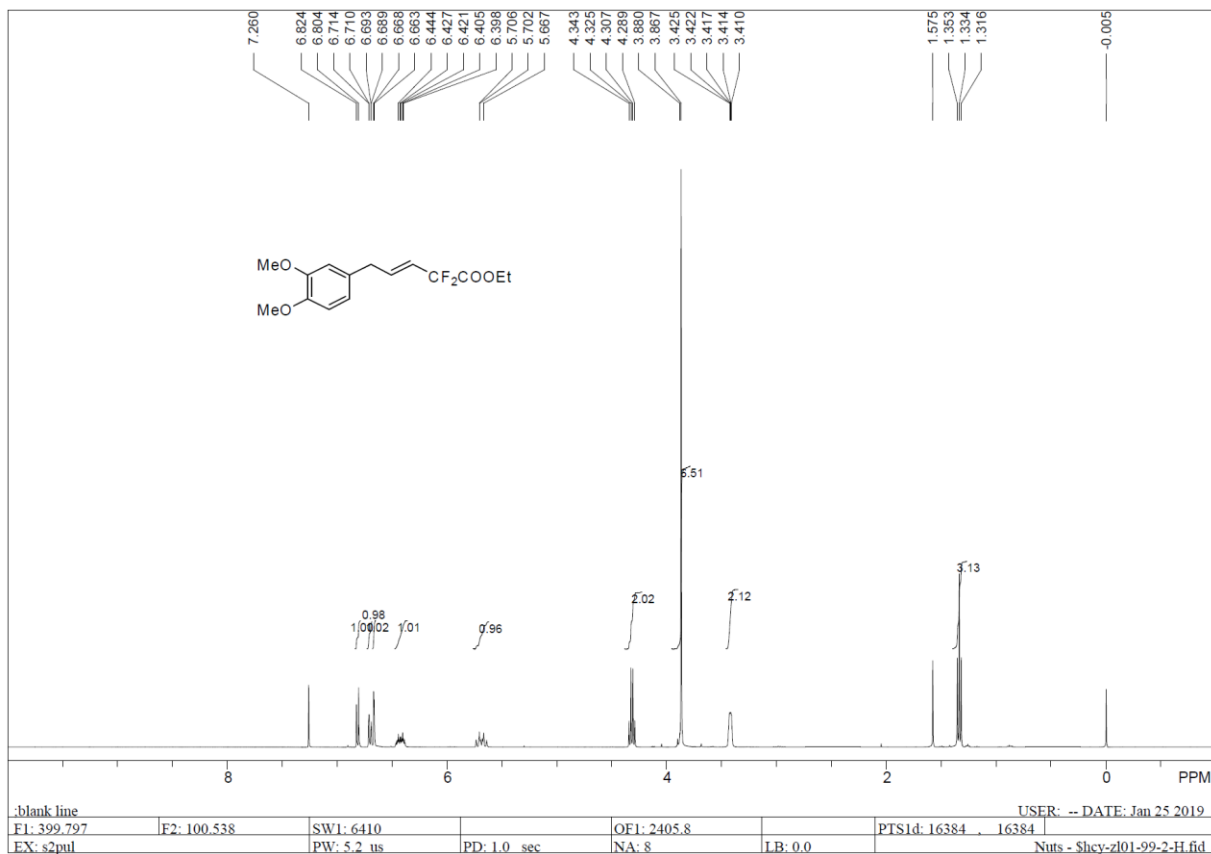

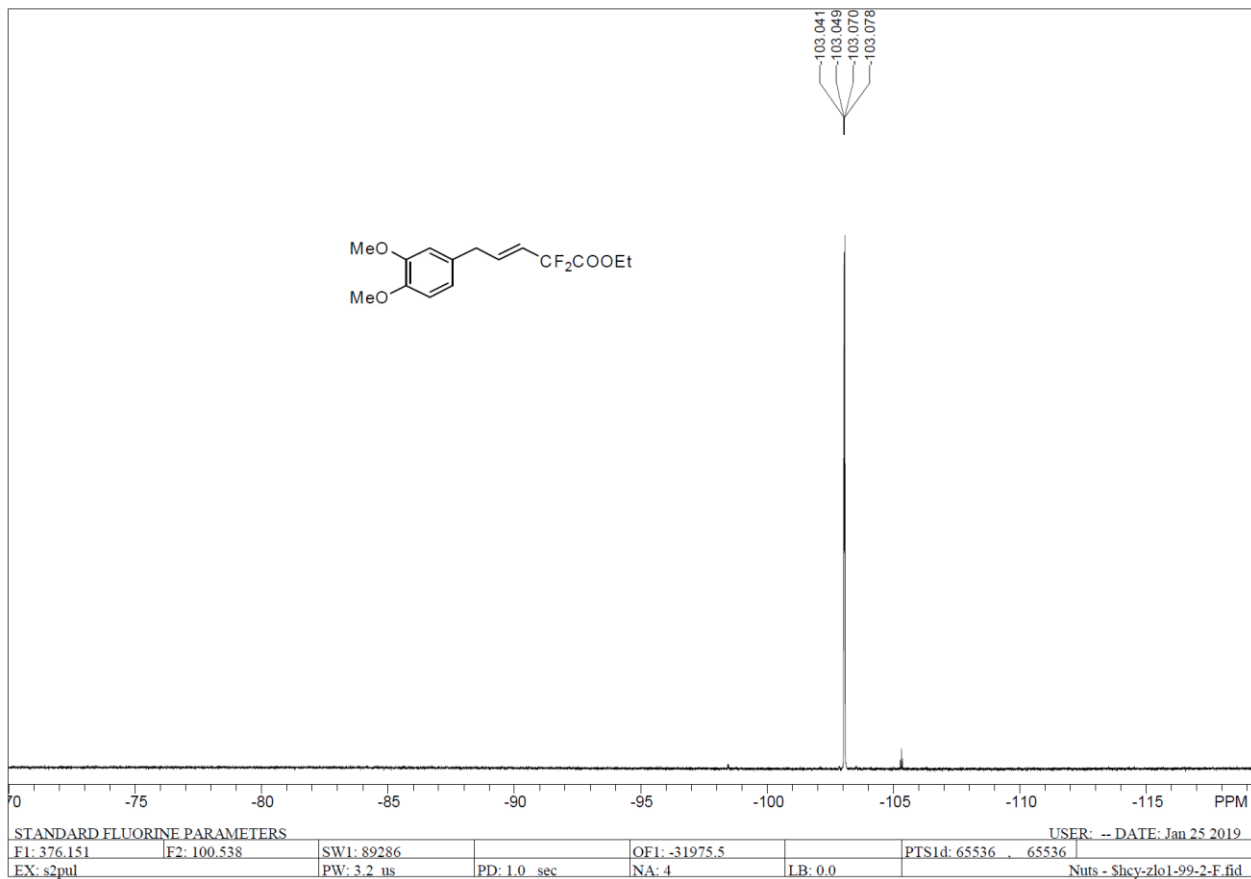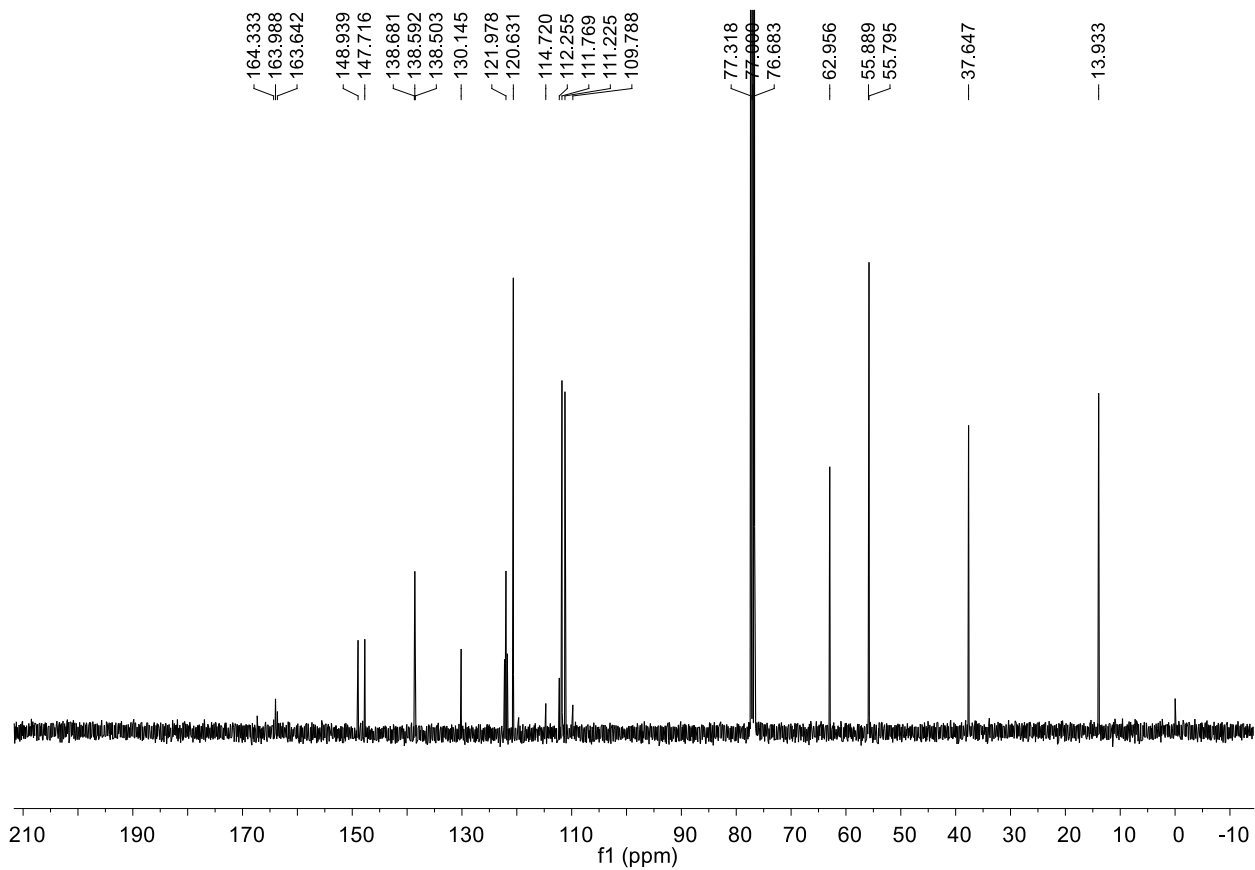

**Ethyl (E)-2,2-difluoro-5-(p-tolyl)pent-3-enoate (6e).**

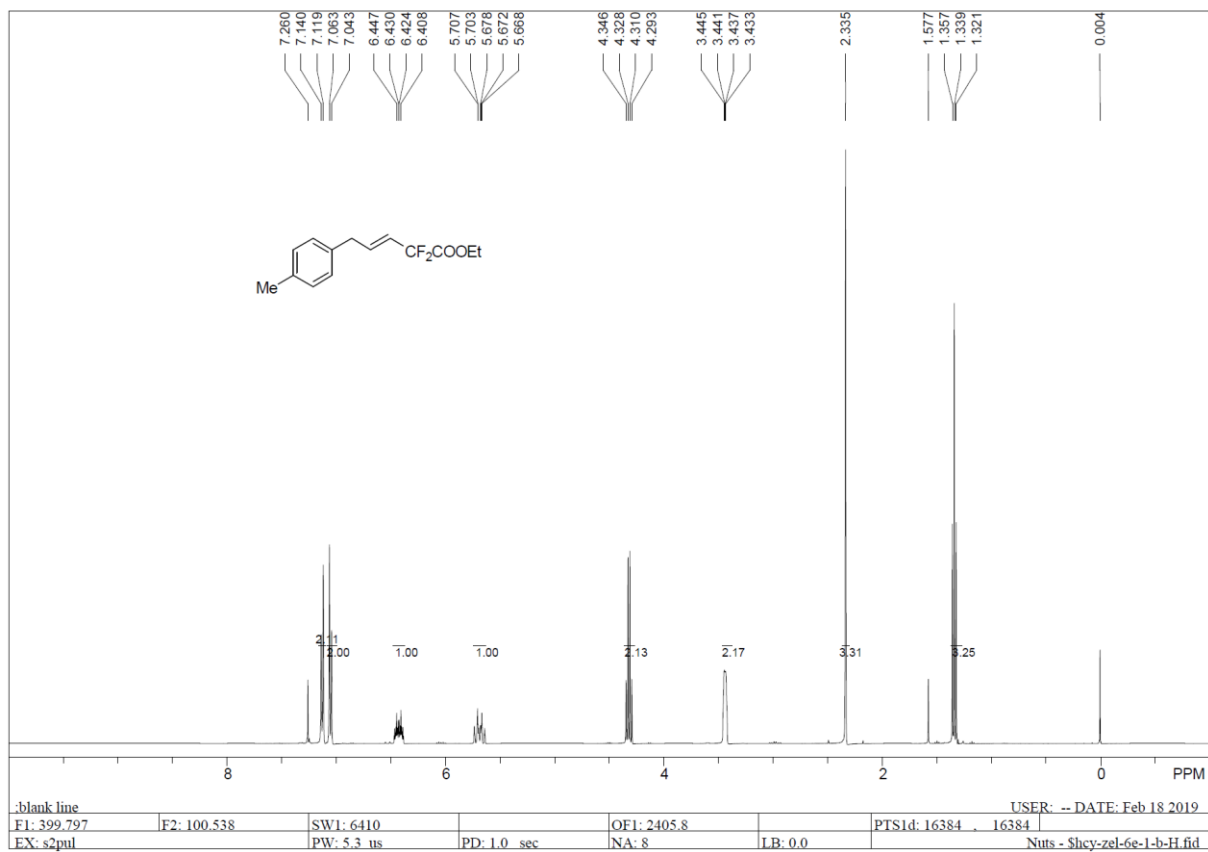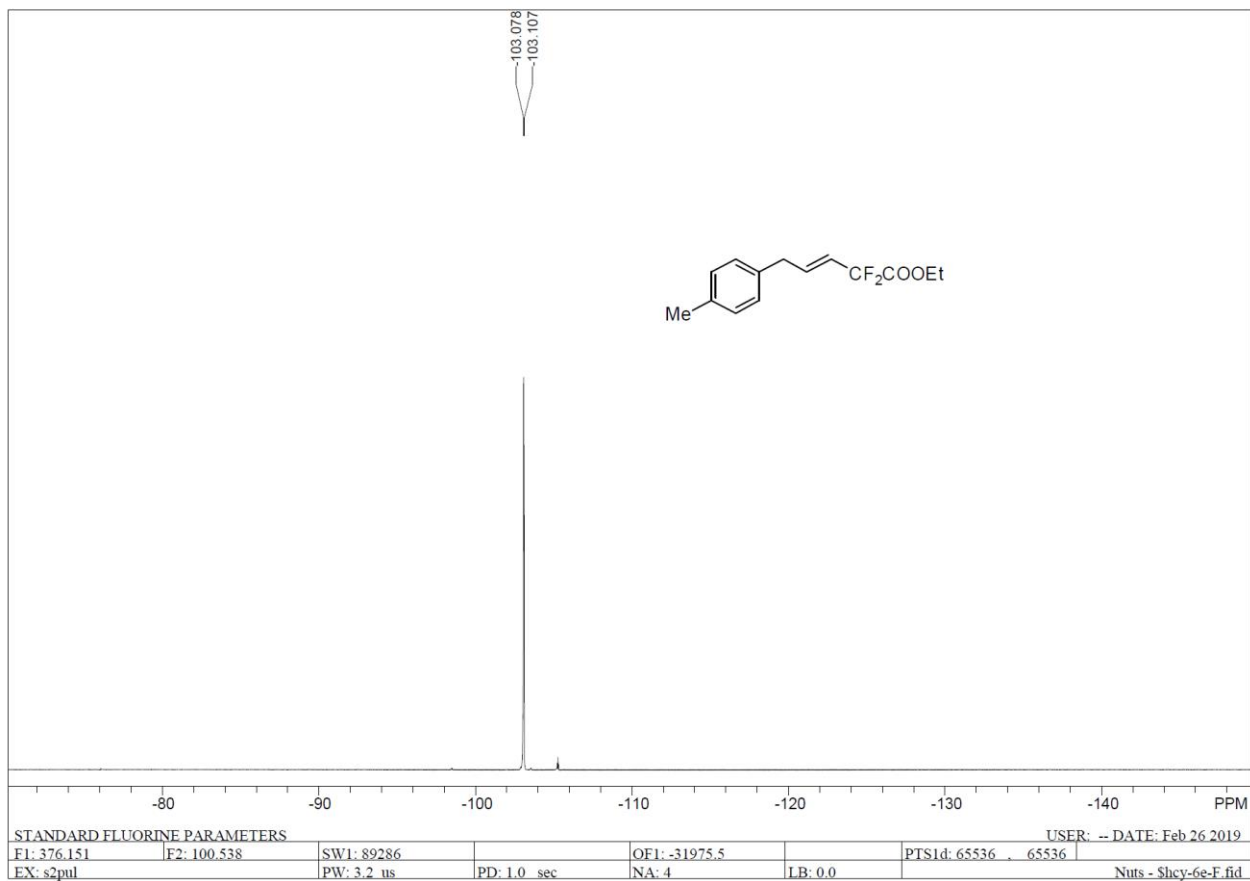

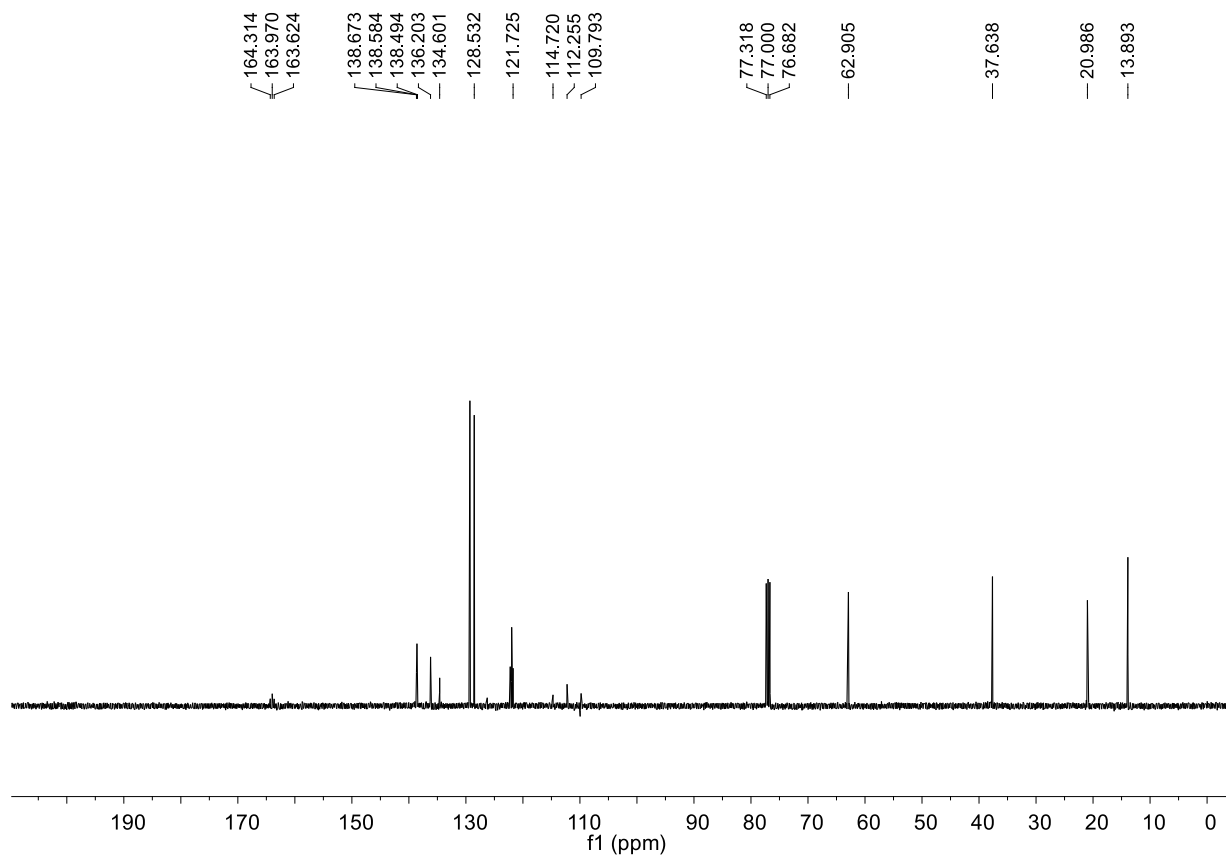

**Ethyl (E)-2,2-difluoro-5-(perfluorophenyl)pent-4-enoate (6f).**

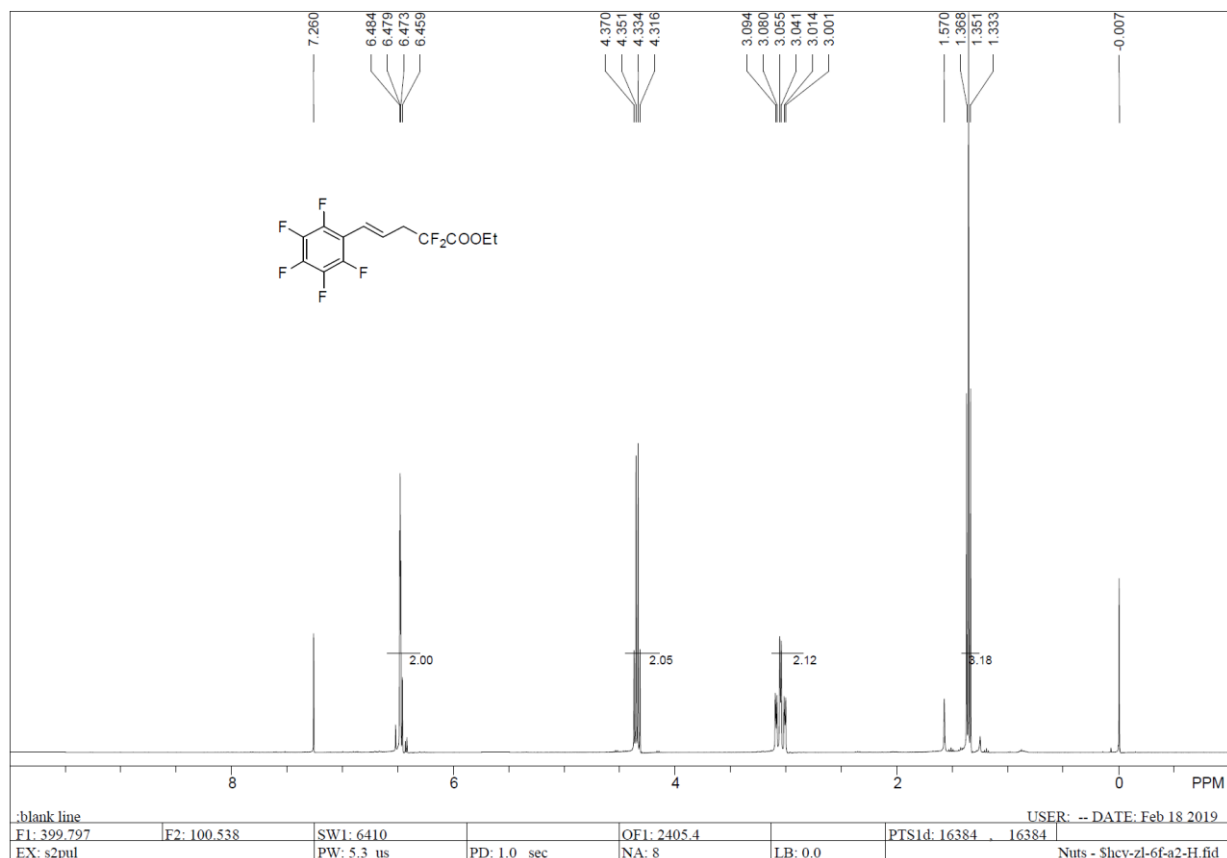

.blank line  
 F1: 399.797 E2: 100.538 SW1: 6410 OF1: 2405.4 PTS1d: 16384 . 16384  
 EX: s2pul PW: 5.3 us PD: 1.0 sec NA: 8 LB: 0.0 Nuts - Shcy-zl-6f-a2-H.fid  
 USER: -- DATE: Feb 18 2019

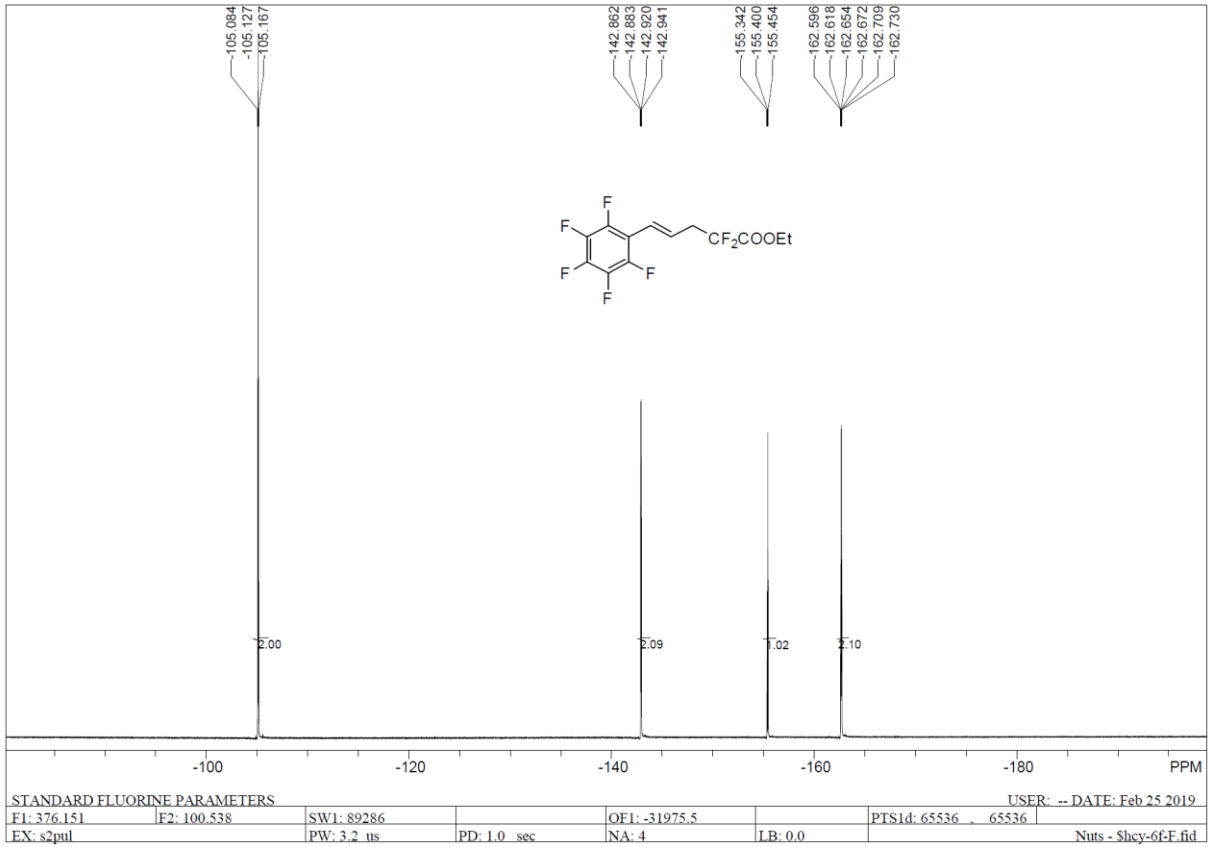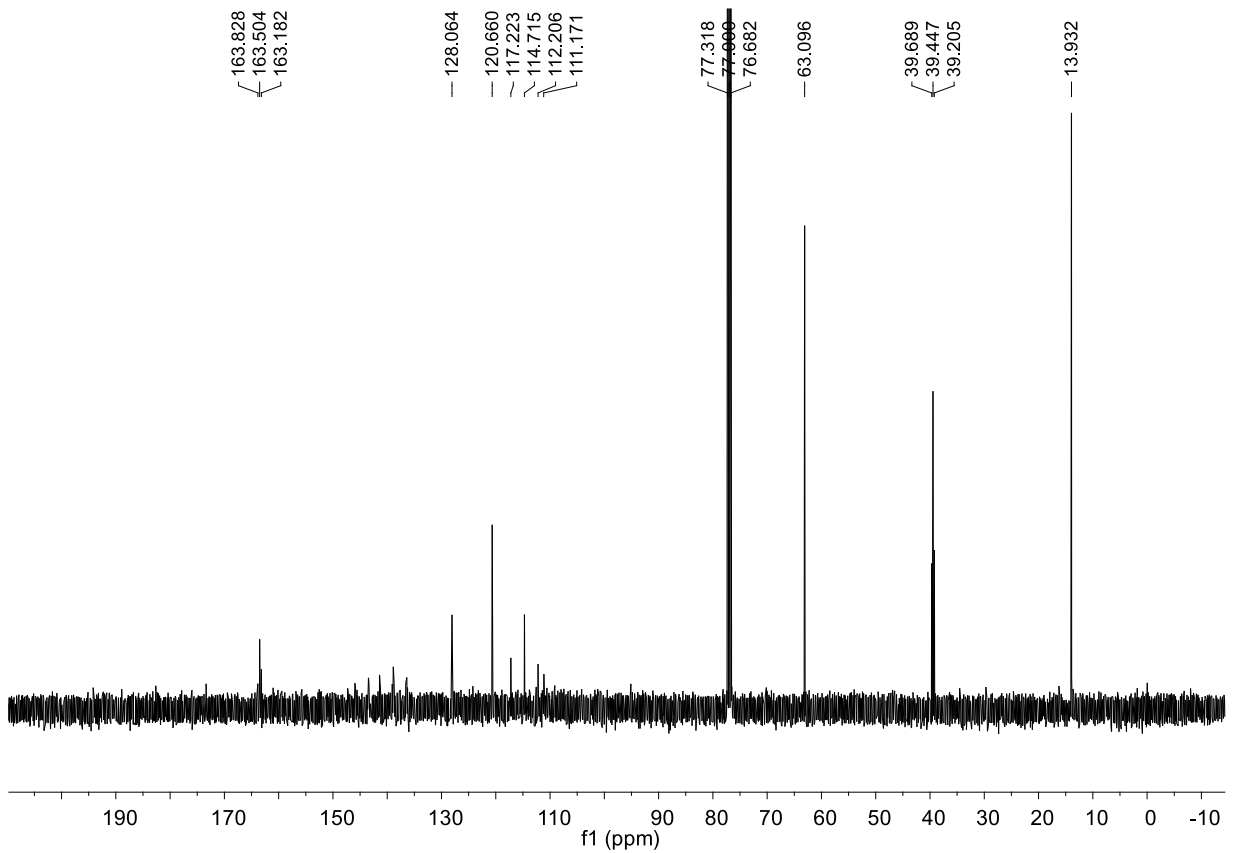

**Ethyl (E)-5-acetoxy-2,2-difluoropent-3-enoate (6g).**

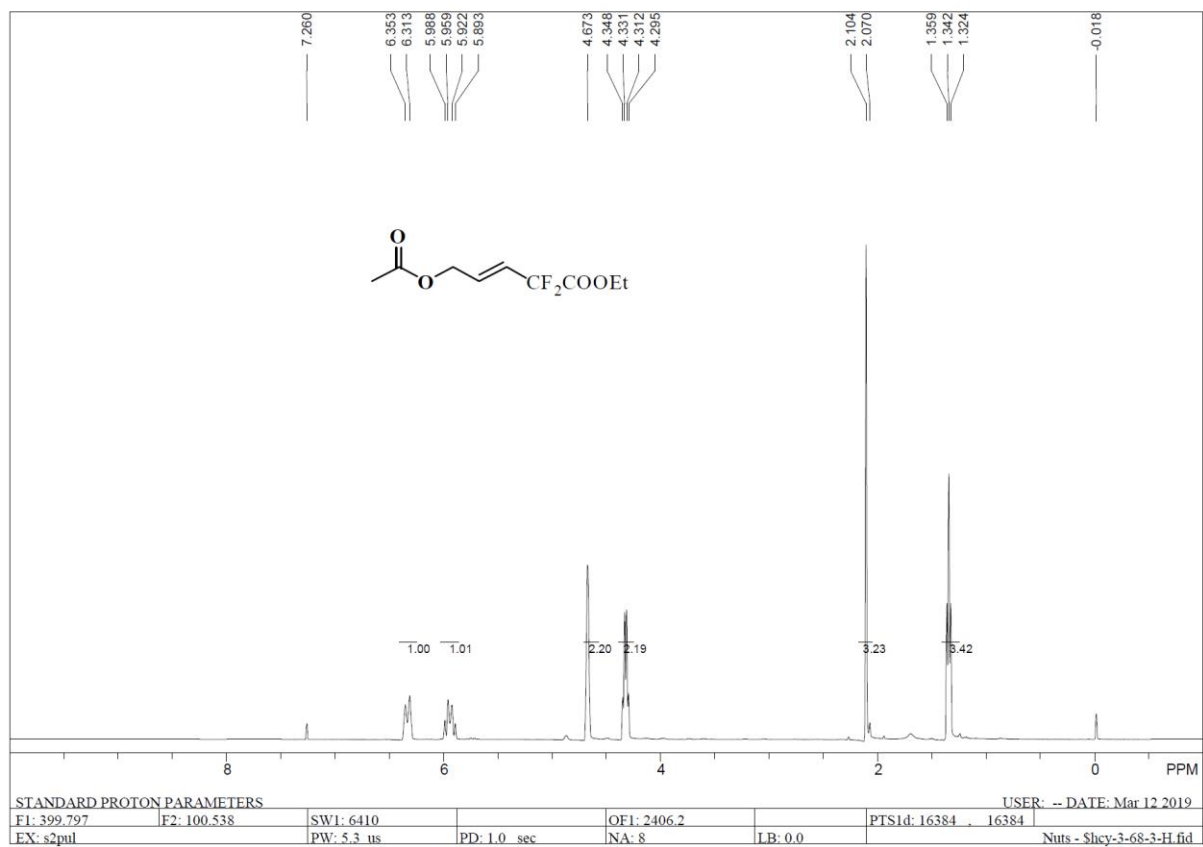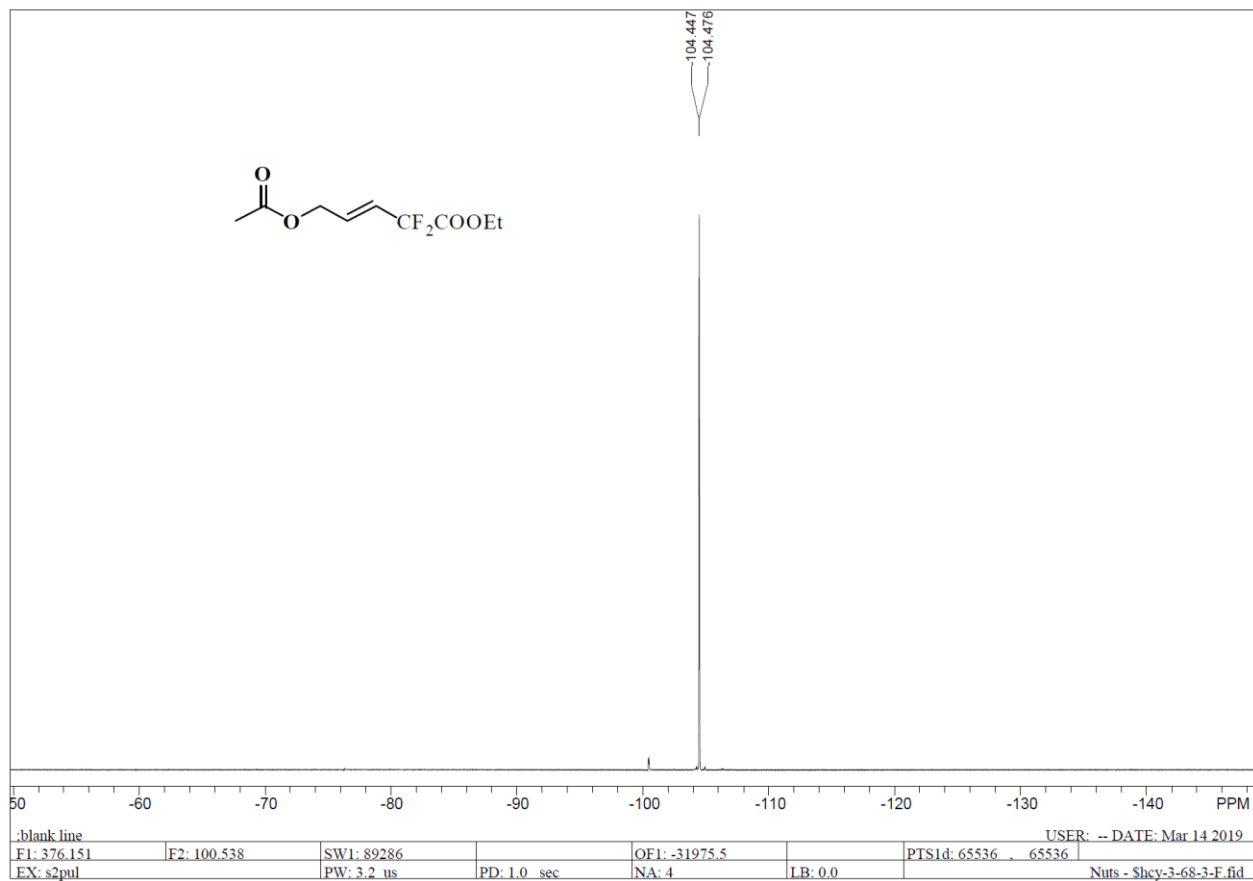

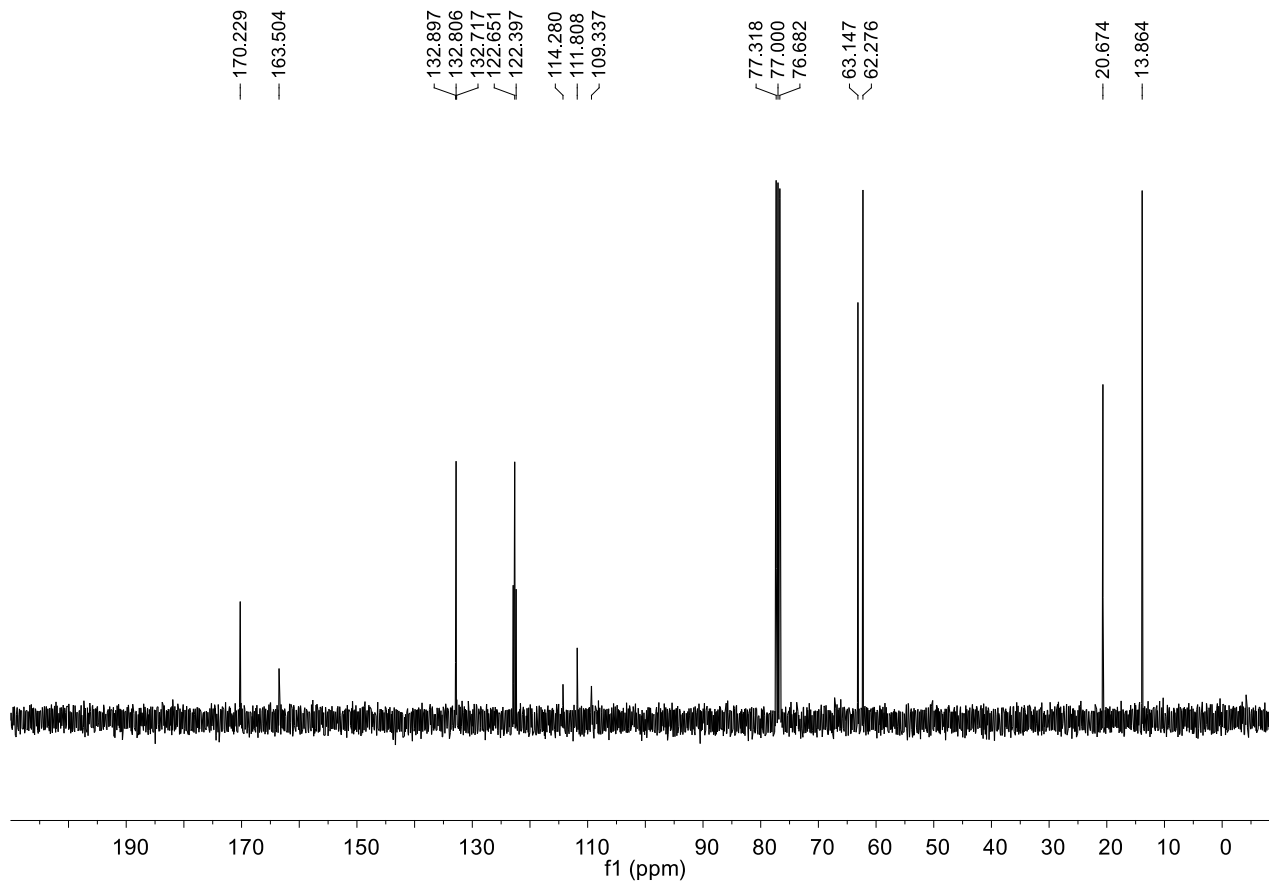

**Ethyl (*E*)-5-((*tert*-butoxycarbonyl)amino)-2,2-difluoropent-3-enoate (6h).**

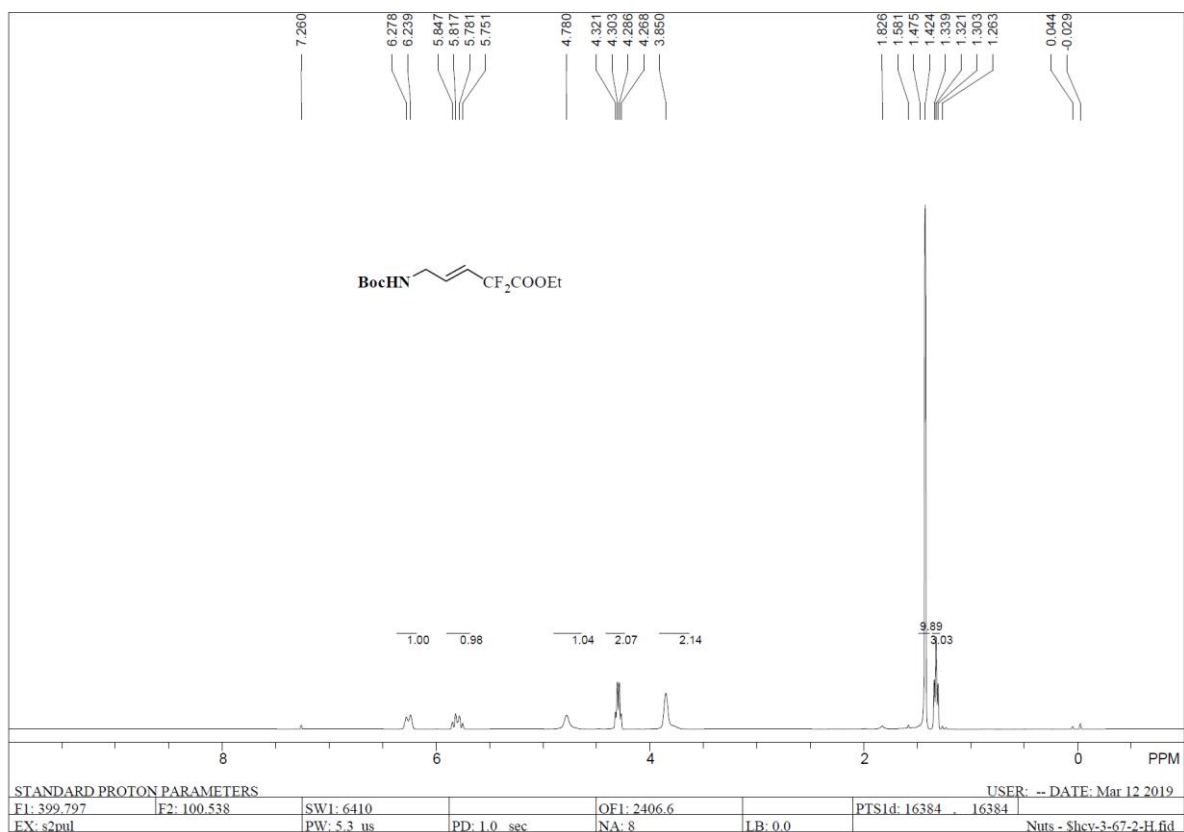

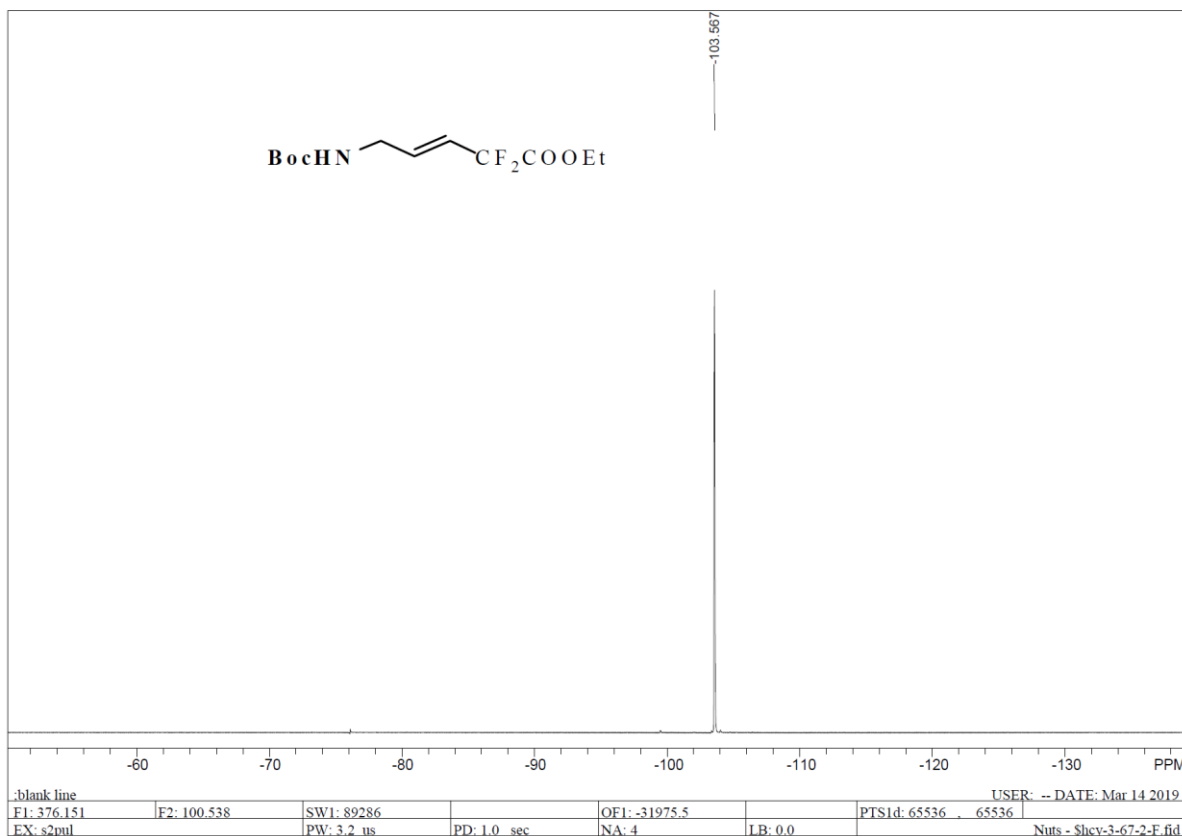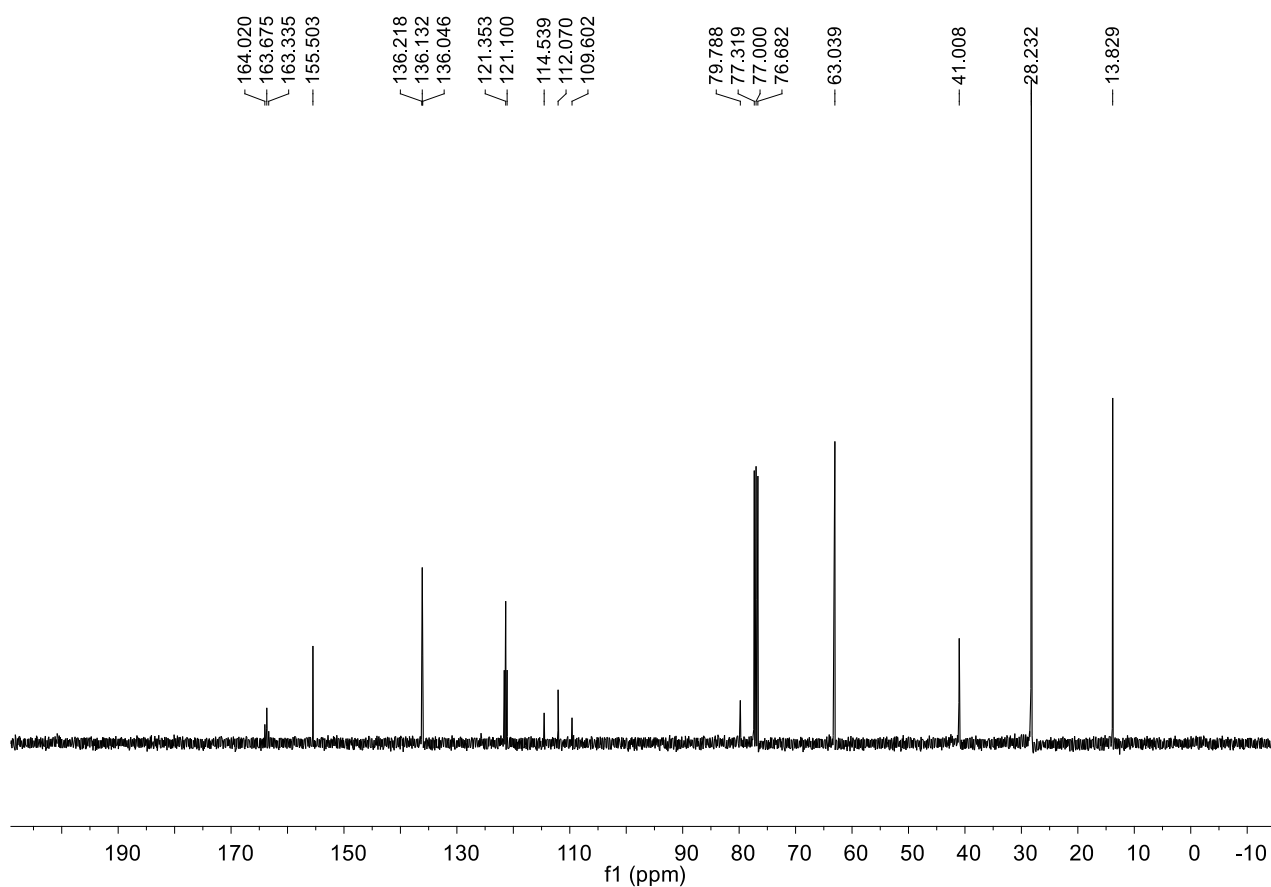



**(E)-2-(4,4,5,5,6,6,7,7,7-nonafluorohept-2-en-1-yl)phenol (6i).**

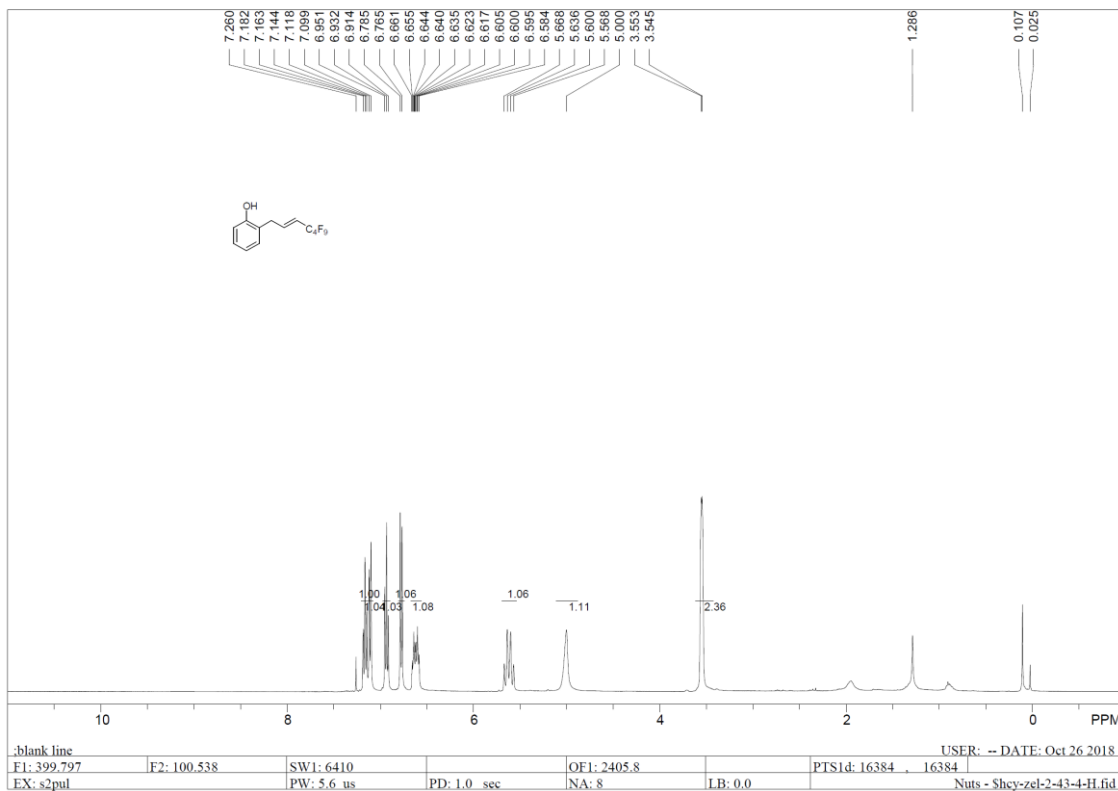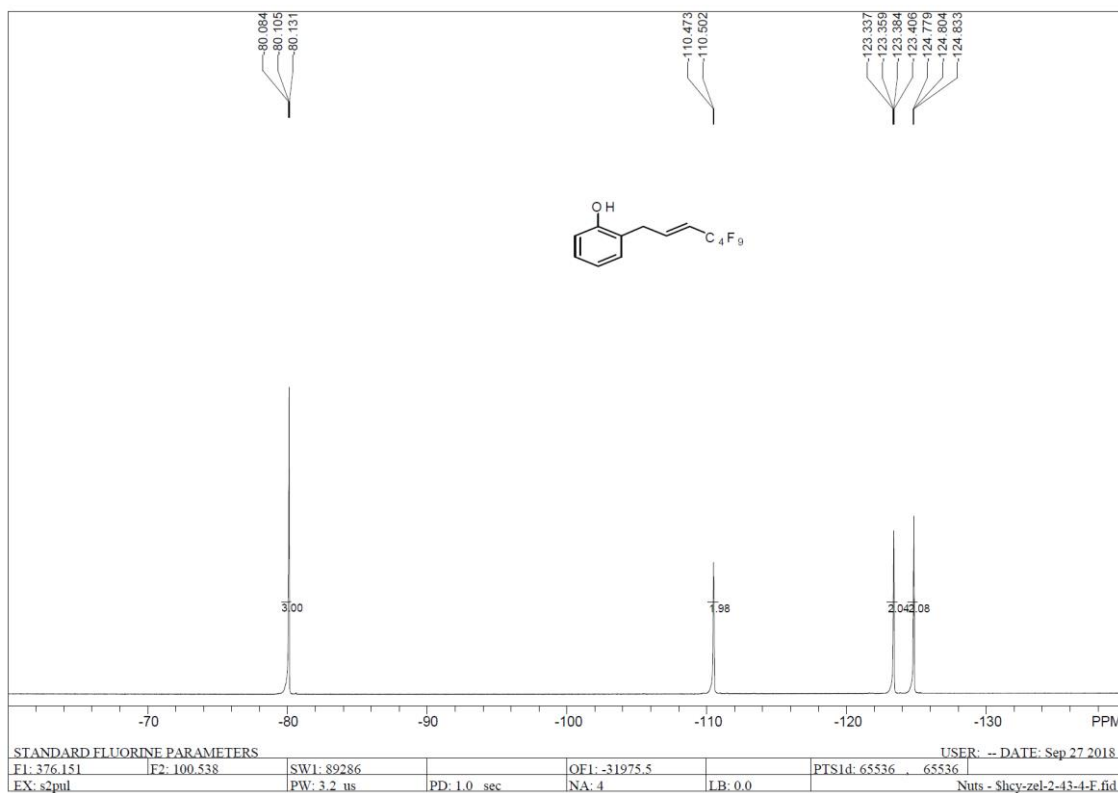



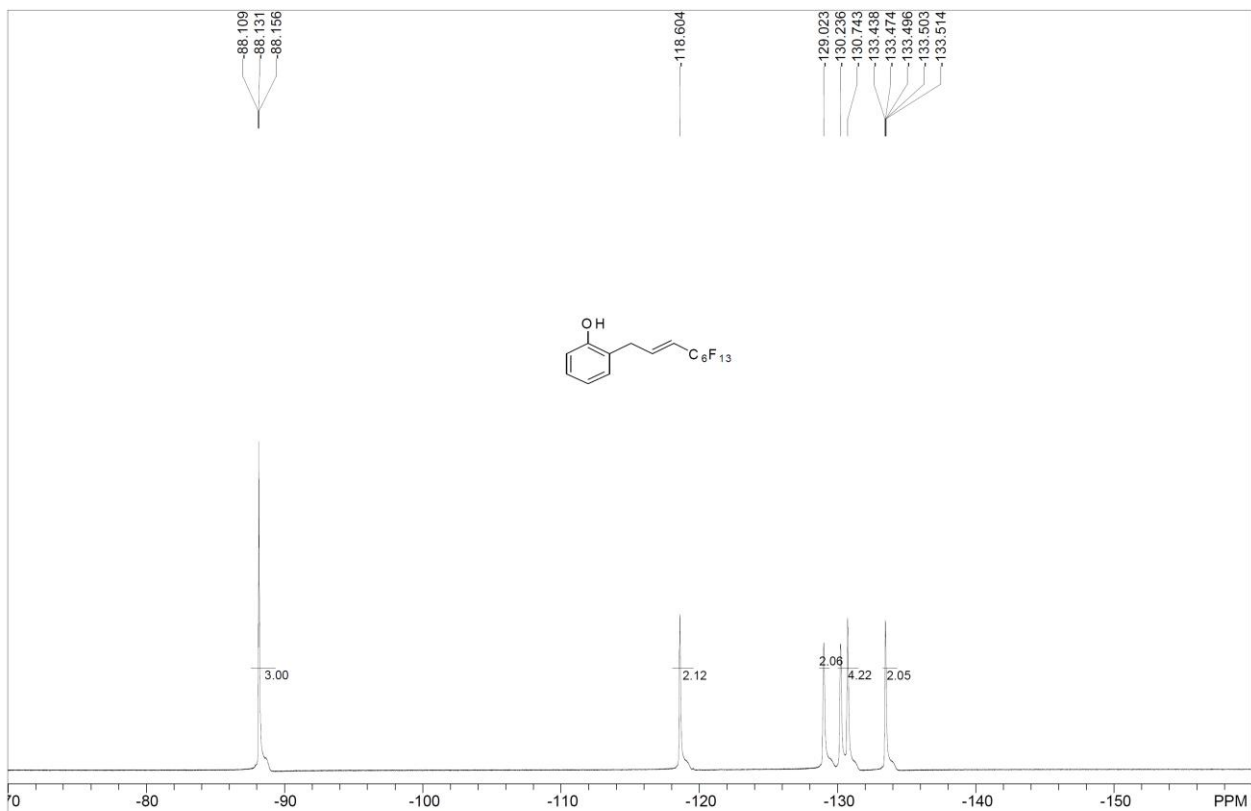

| STANDARD FLUORINE PARAMETERS |             |             |               |              |                                | USER: -- DATE: Jan 4 2019 |
|------------------------------|-------------|-------------|---------------|--------------|--------------------------------|---------------------------|
| F1: 376.153                  | F2: 100.538 | SW1: 89286  | OF1: -31975.8 | PTS1d: 65536 | 65536                          |                           |
| EX: s2pul                    | PW: 3.2 us  | PD: 1.0 sec | NA: 4         | LB: 0.0      | Nuts - Shey-zel-3-15-1-a-F.fid |                           |

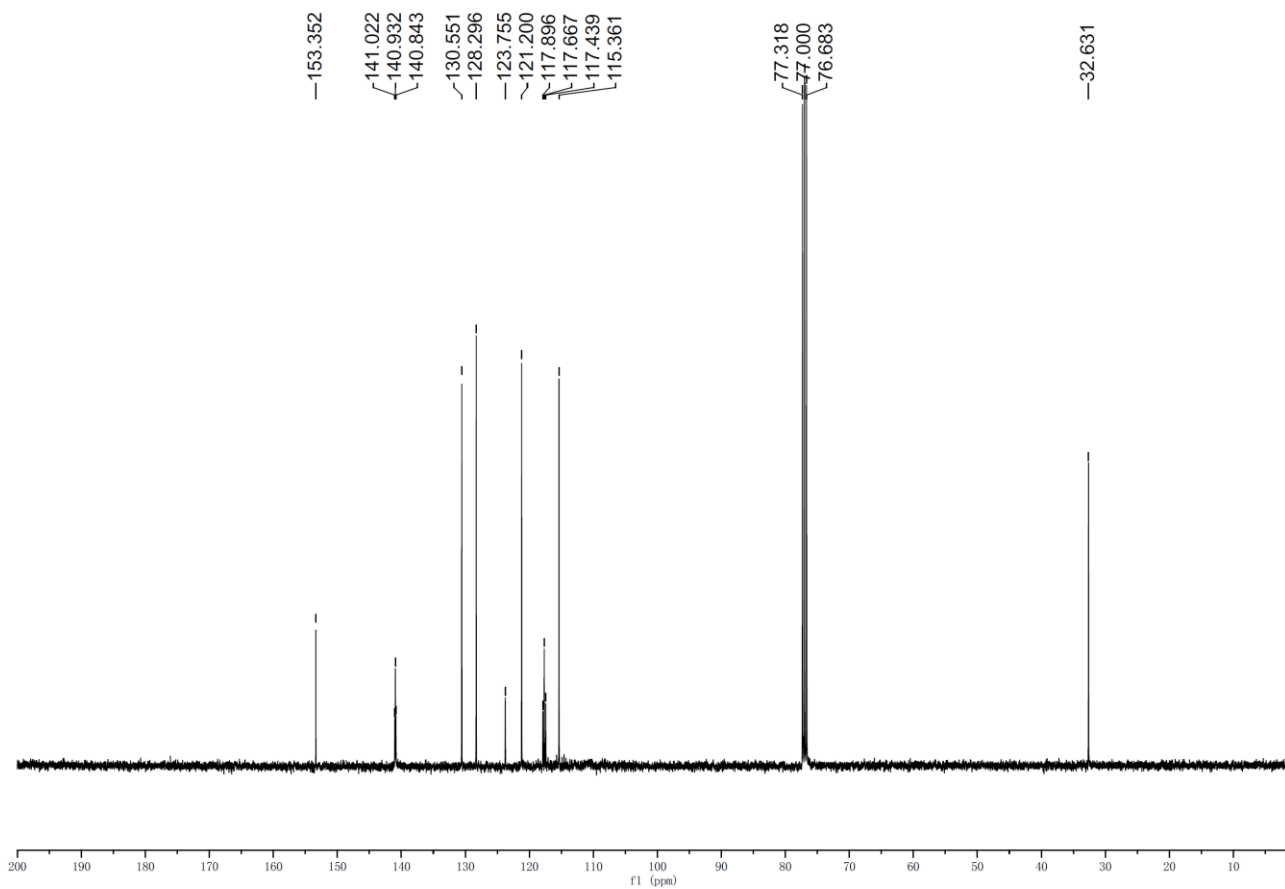

**(E)-2-methoxy-6-(4,4,5,5,6,6,7,7,7-nonafluorohept-2-en-1-yl)phenol (6k).**

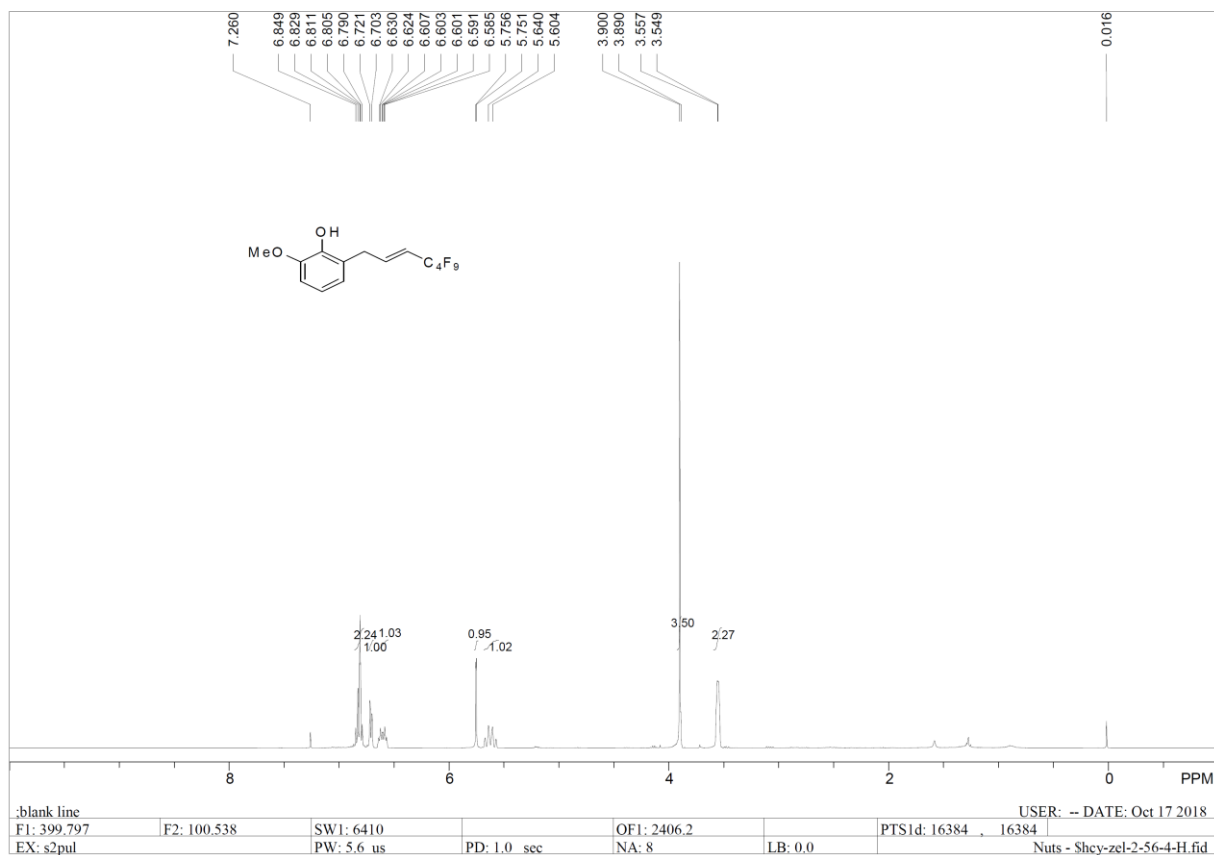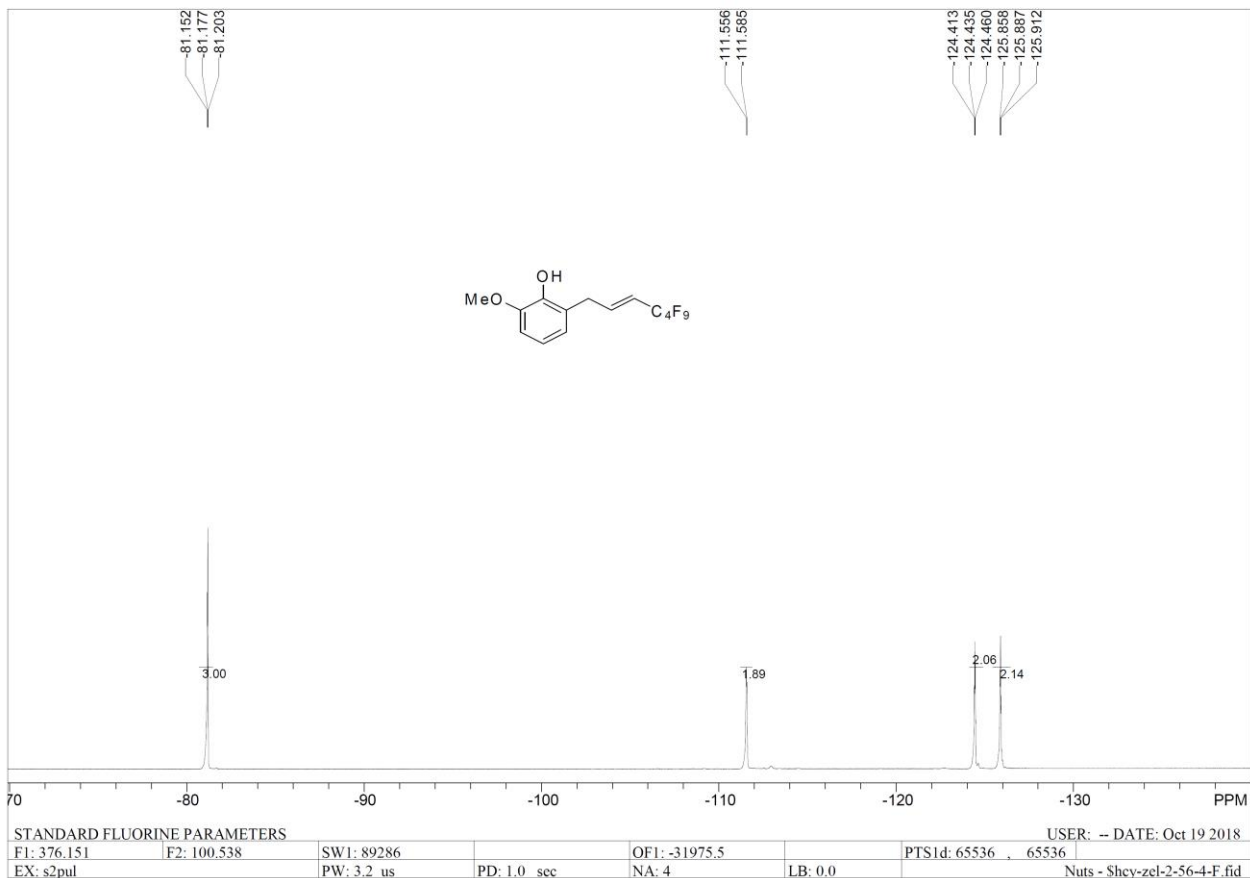

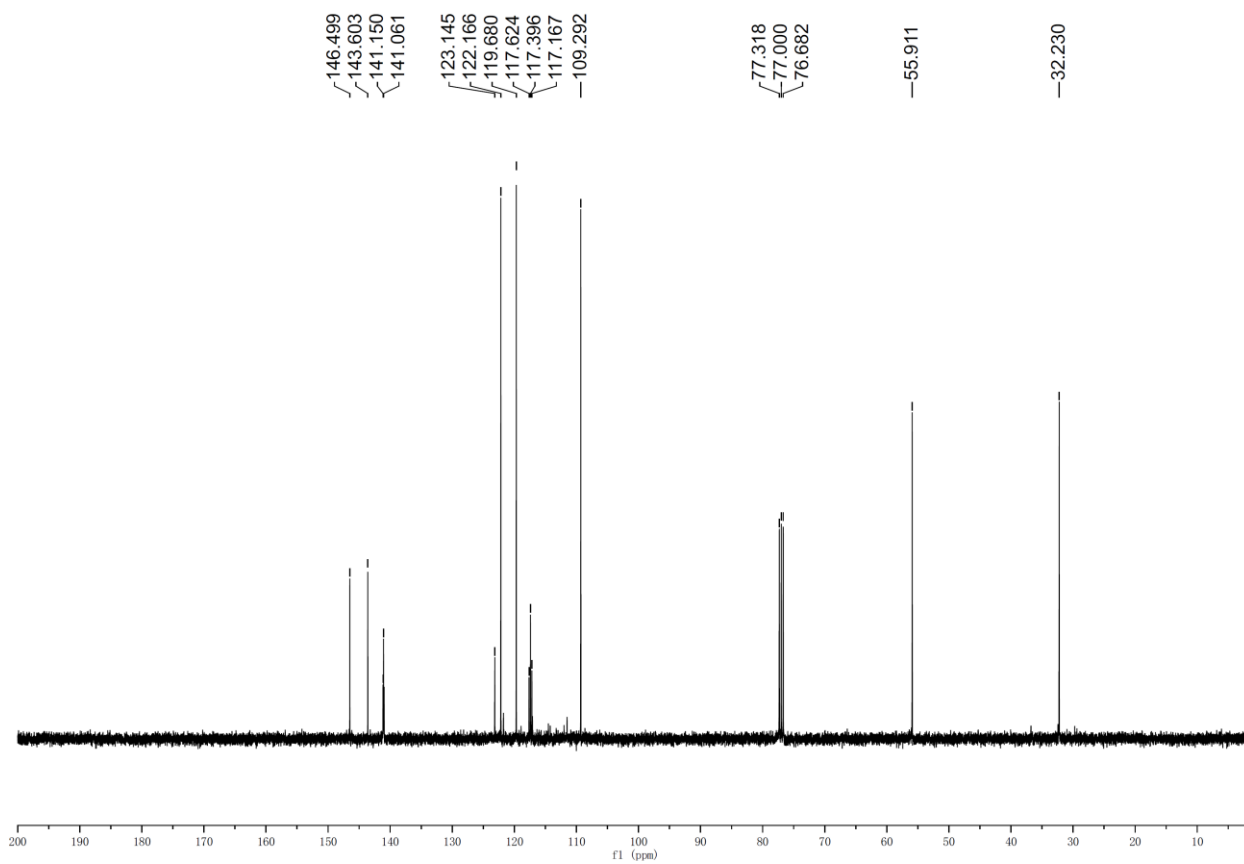

**(E)-2-methoxy-6-(4,4,5,5,6,6,7,7,8,8,9,9,9-tridecafluoronon-2-en-1-yl)phenol (6l).**

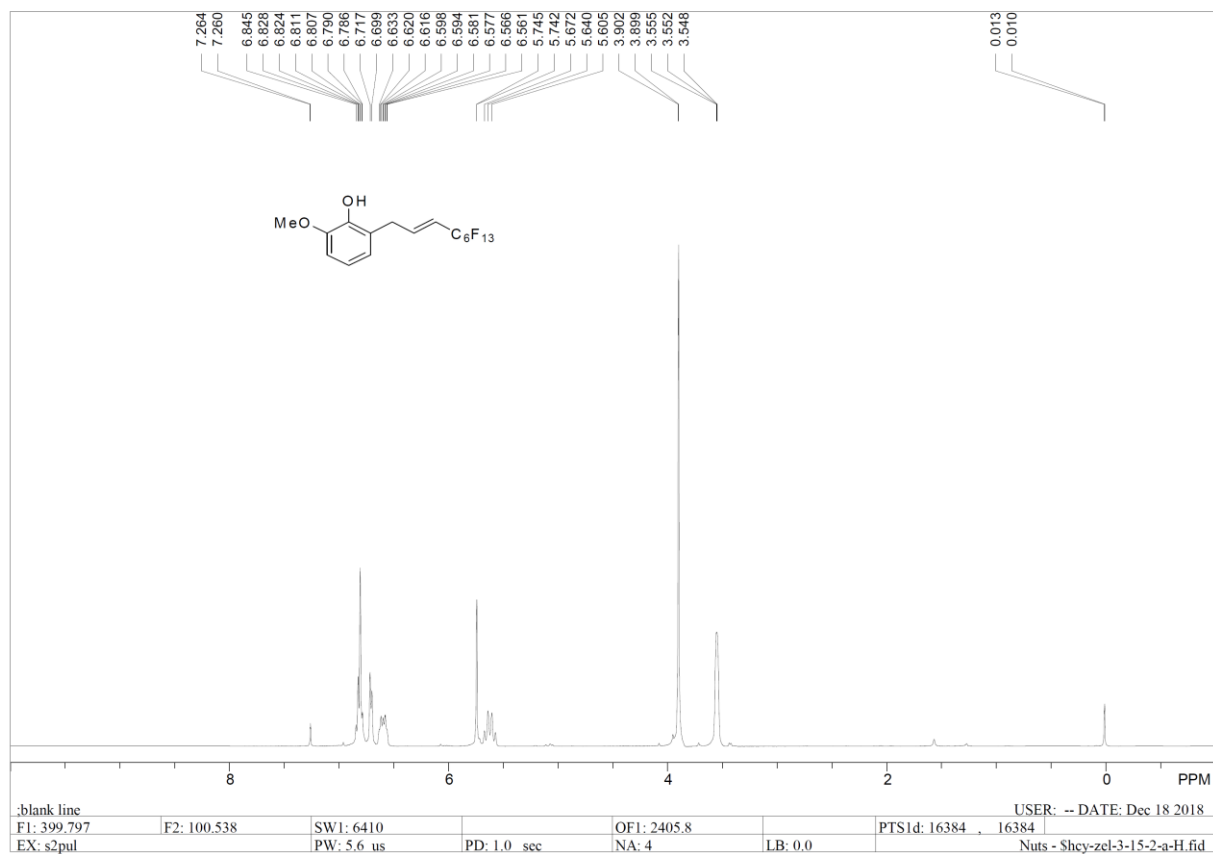

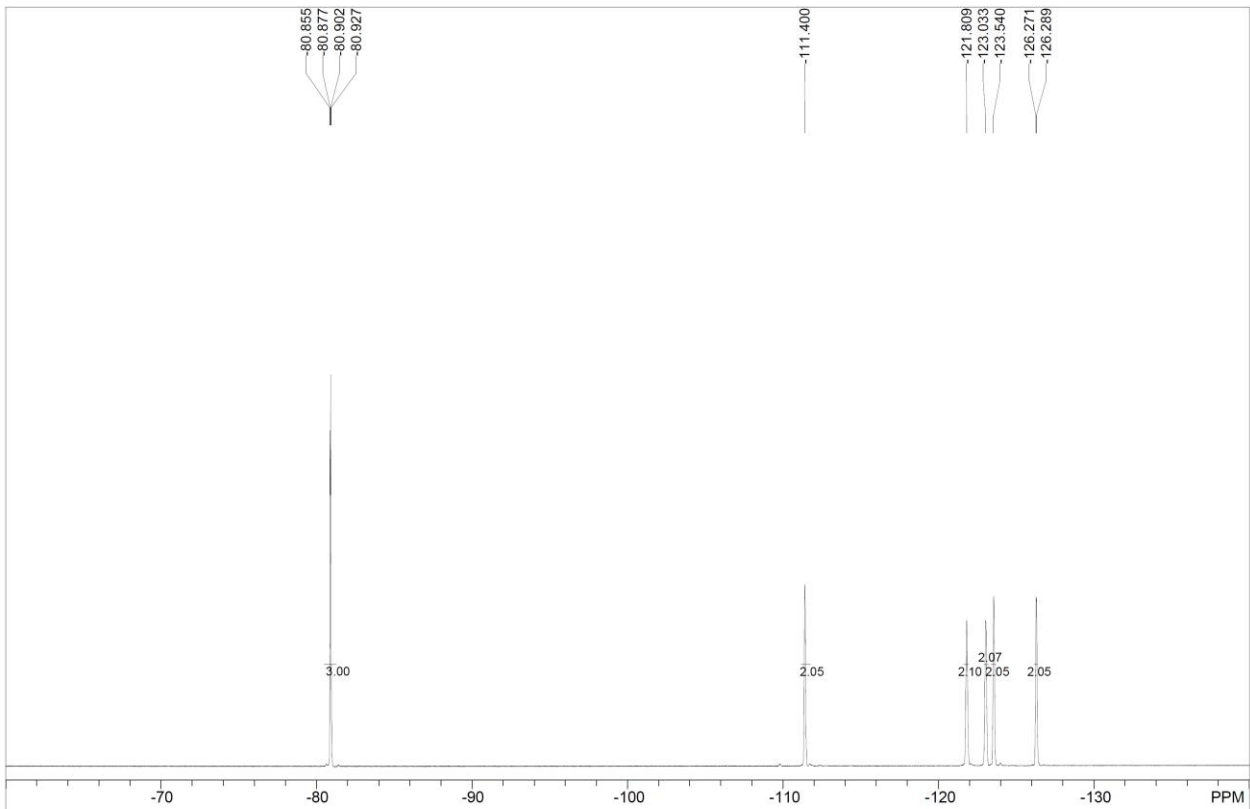

STANDARD FLUORINE PARAMETERS

USER: -- DATE: Dec 19 2018

|             |             |             |               |              |                                |
|-------------|-------------|-------------|---------------|--------------|--------------------------------|
| F1: 376.151 | F2: 100.538 | SW1: 89286  | OF1: -31975.5 | PTS1d: 65536 | 65536                          |
| EX: s2pul   | PW: 3.2 us  | PD: 1.0 sec | NA: 4         | LB: 0.0      | Nuts - Shey-zel-3-15-2-a-F.fid |

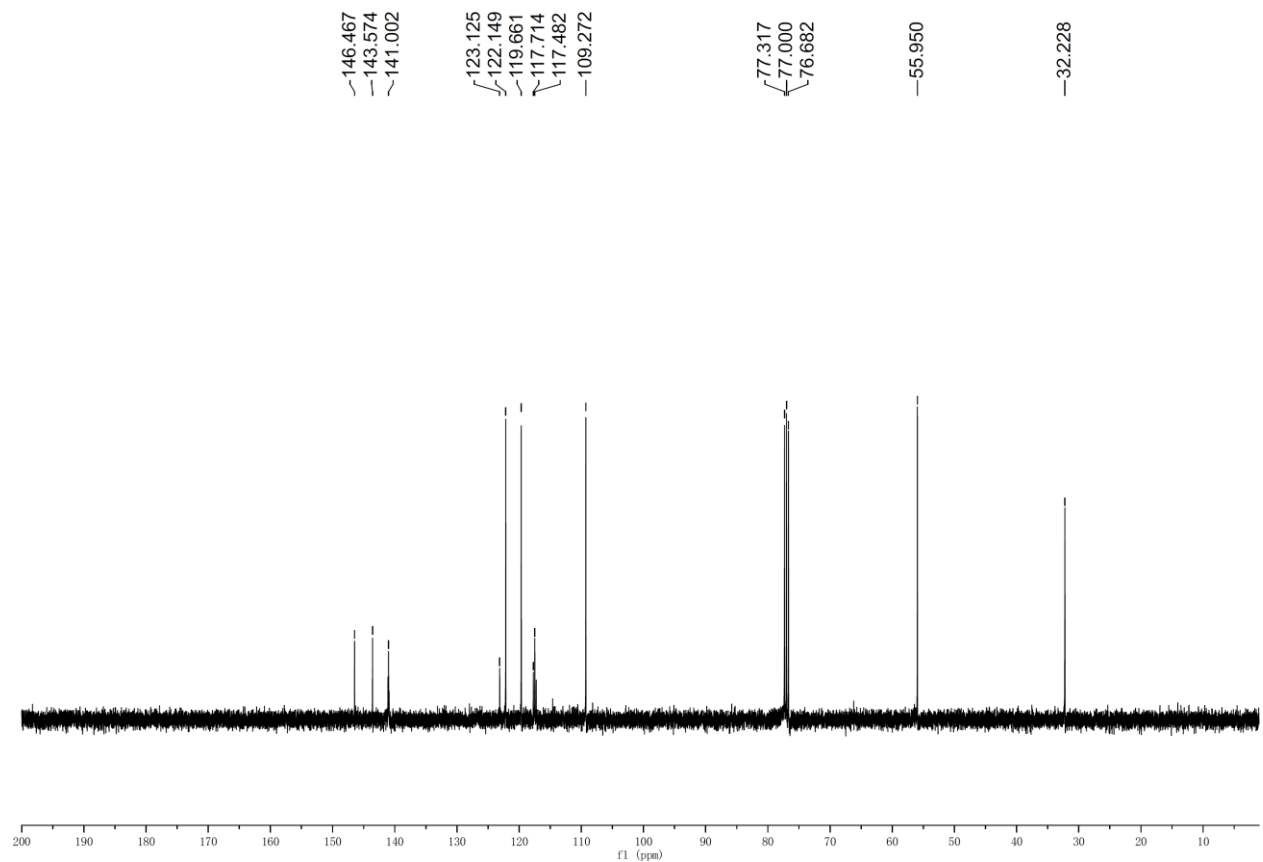

**(E)-4-ethyl-2-(4,4,5,5,6,6,7,7,7-nonafluorohept-2-en-1-yl)phenol (6m).**

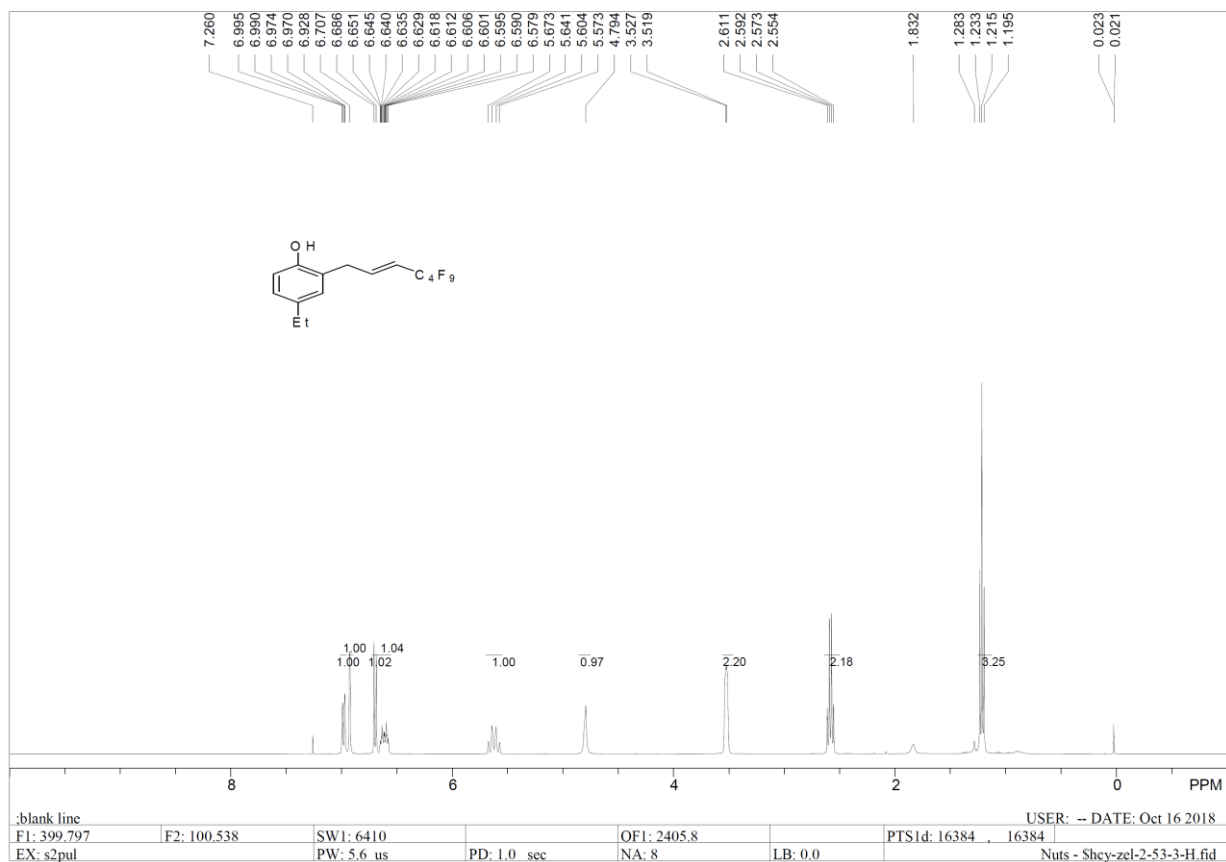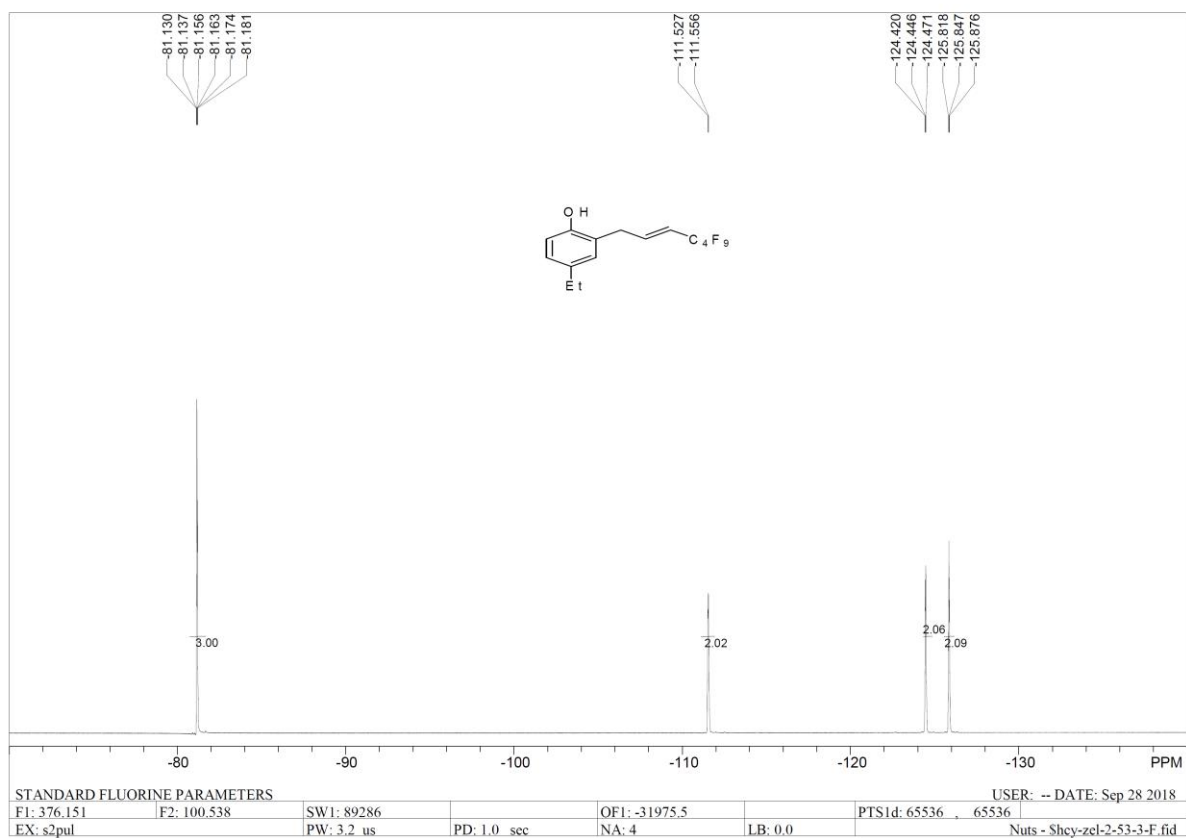

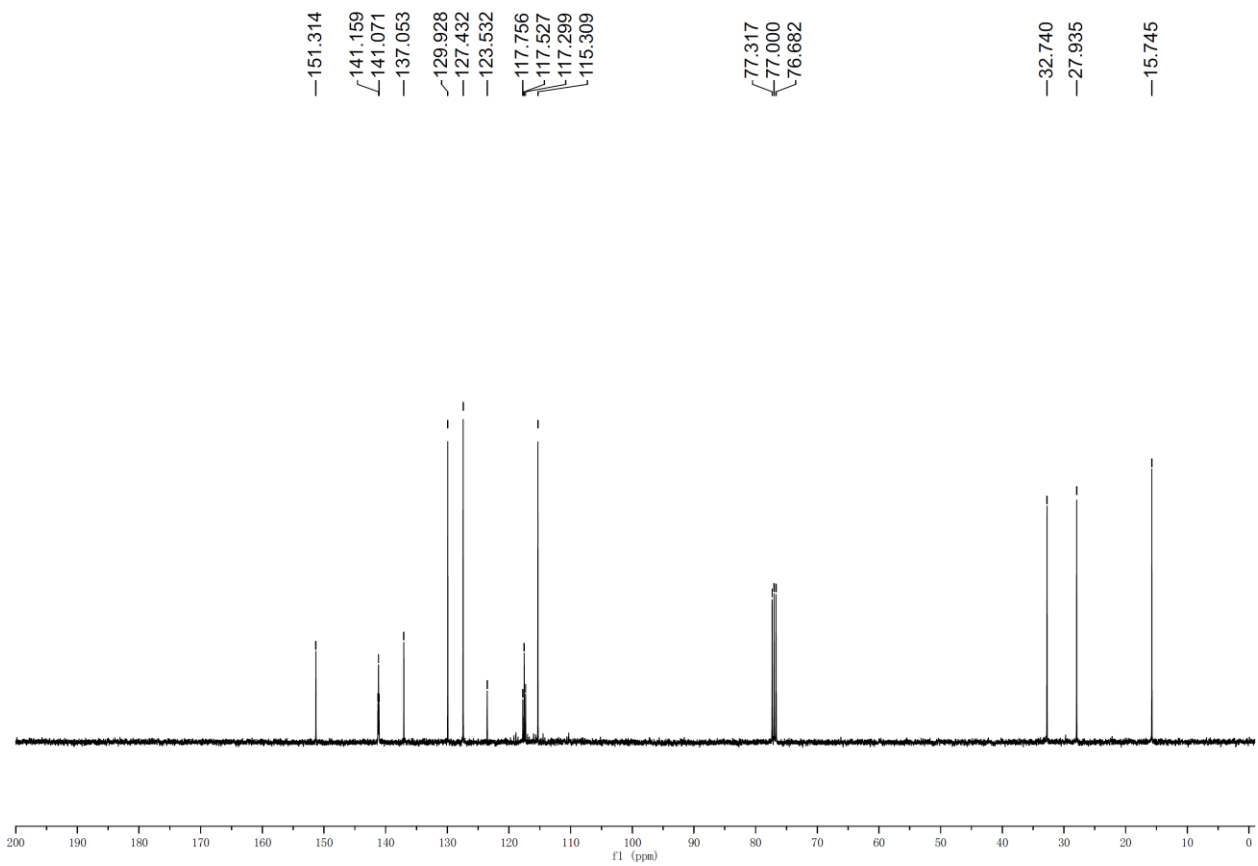

**(E)-4-methoxy-2-(4,4,5,5,6,6,7,7,7-nonafluorohept-2-en-1-yl)phenol (6n).**

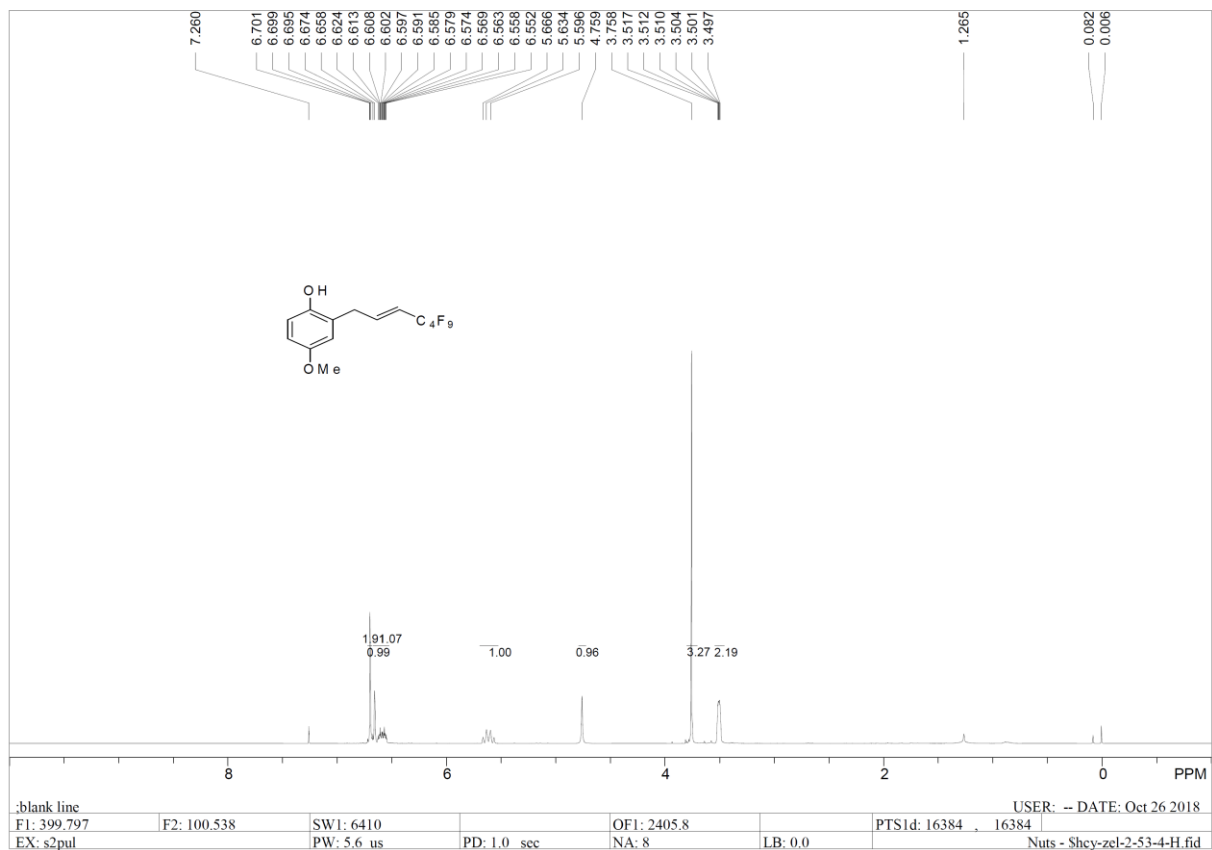



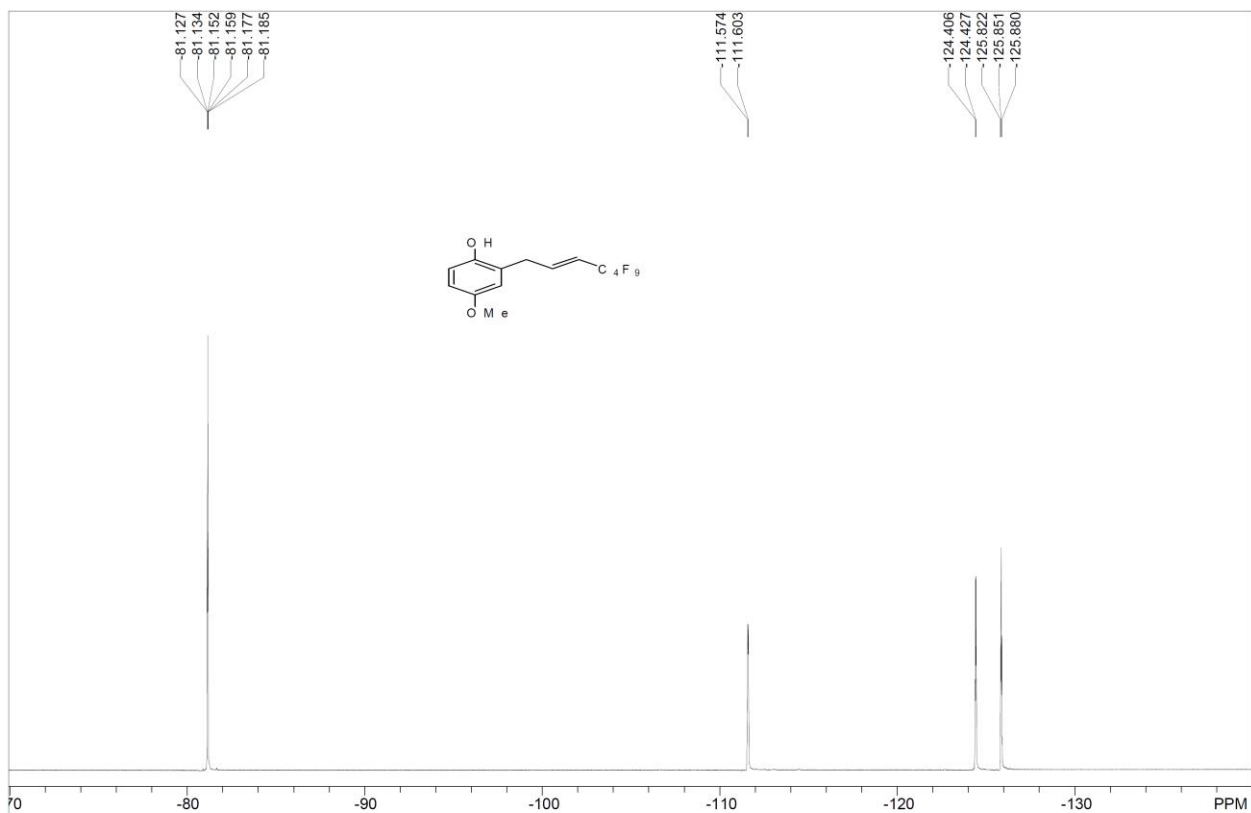

STANDARD FLUORINE PARAMETERS  
 F1: 376.151 F2: 100.538 SW1: 89286 OF1: -31975.5 USER: -- DATE: Sep 28 2018  
 EX: s2pul PW: 3.2 us PD: 1.0 sec NA: 4 LB: 0.0 PTS1d: 65536 , 65536  
 Nuts - Shey-zel-2-53-4-F.fid

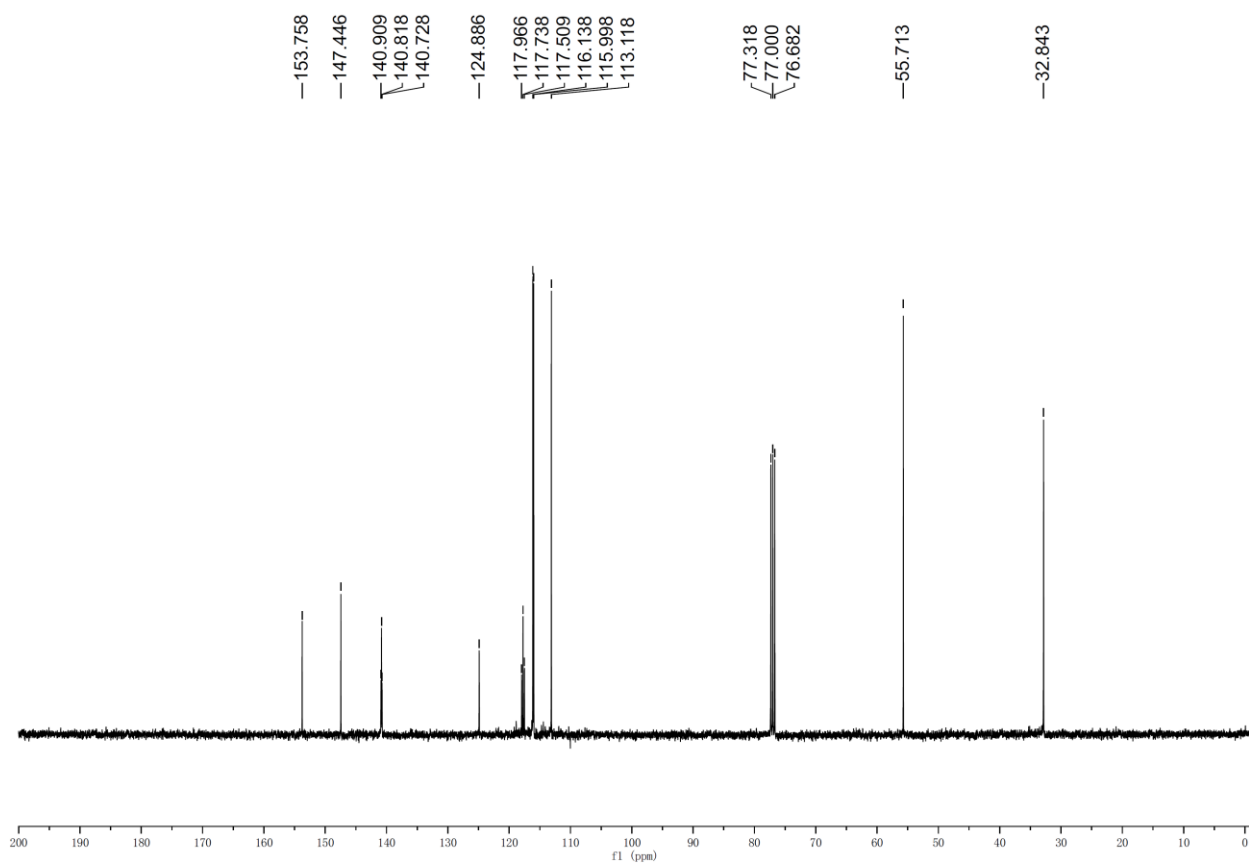

**(E)-4-fluoro-2-(4,4,5,5,6,6,7,7,7-nonafluorohept-2-en-1-yl)phenol (6o).**

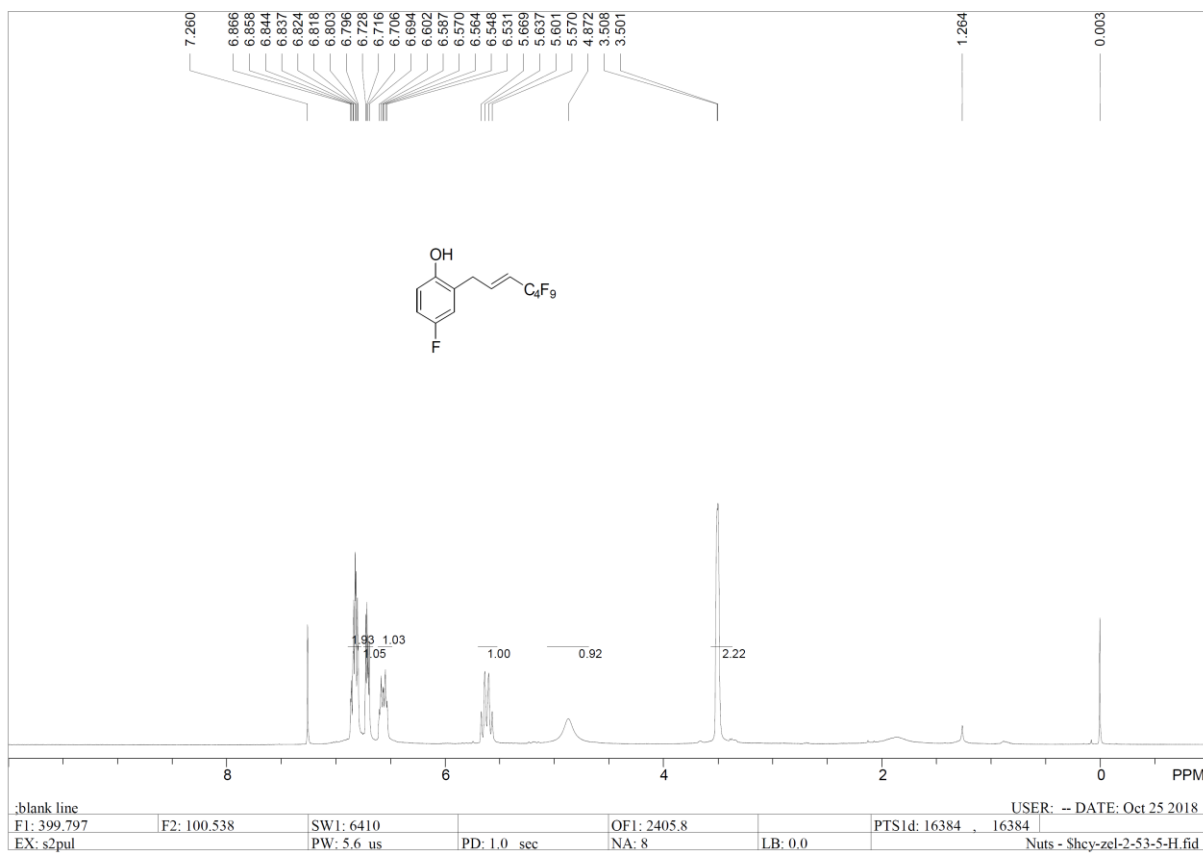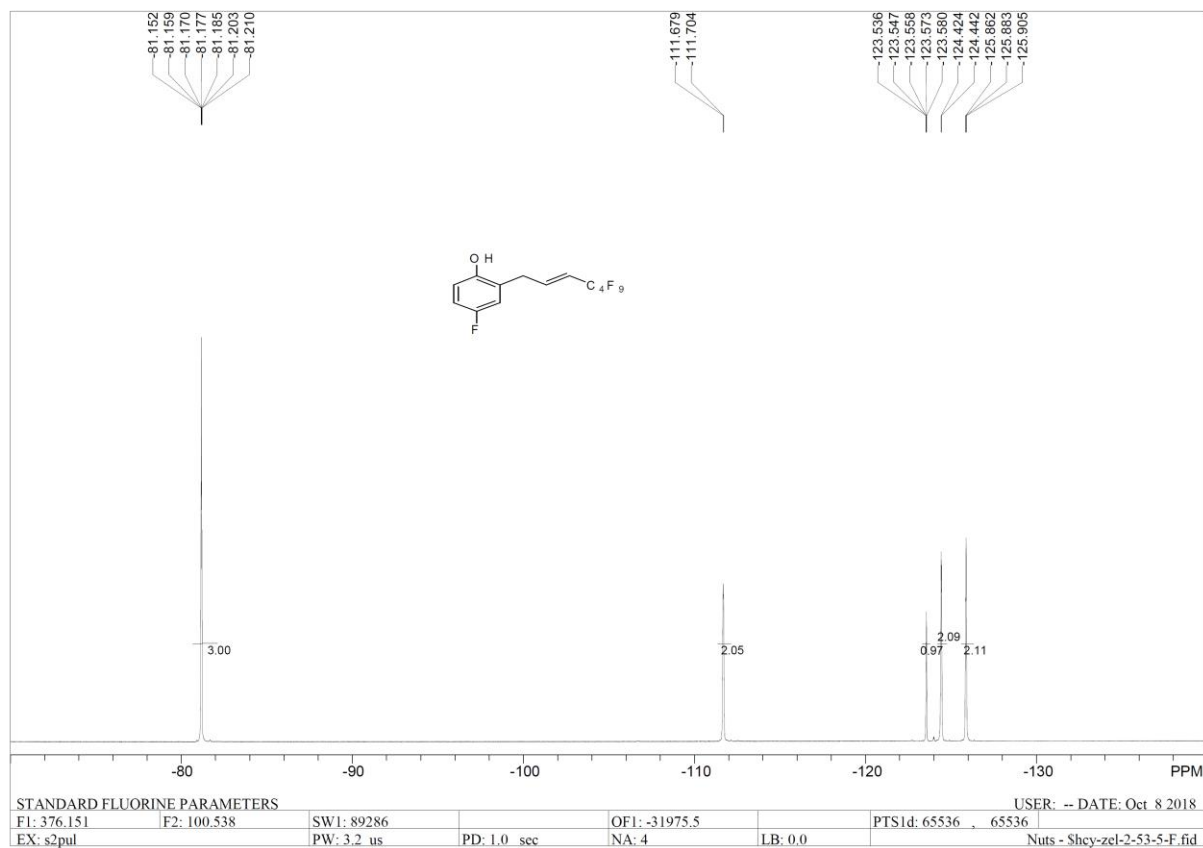

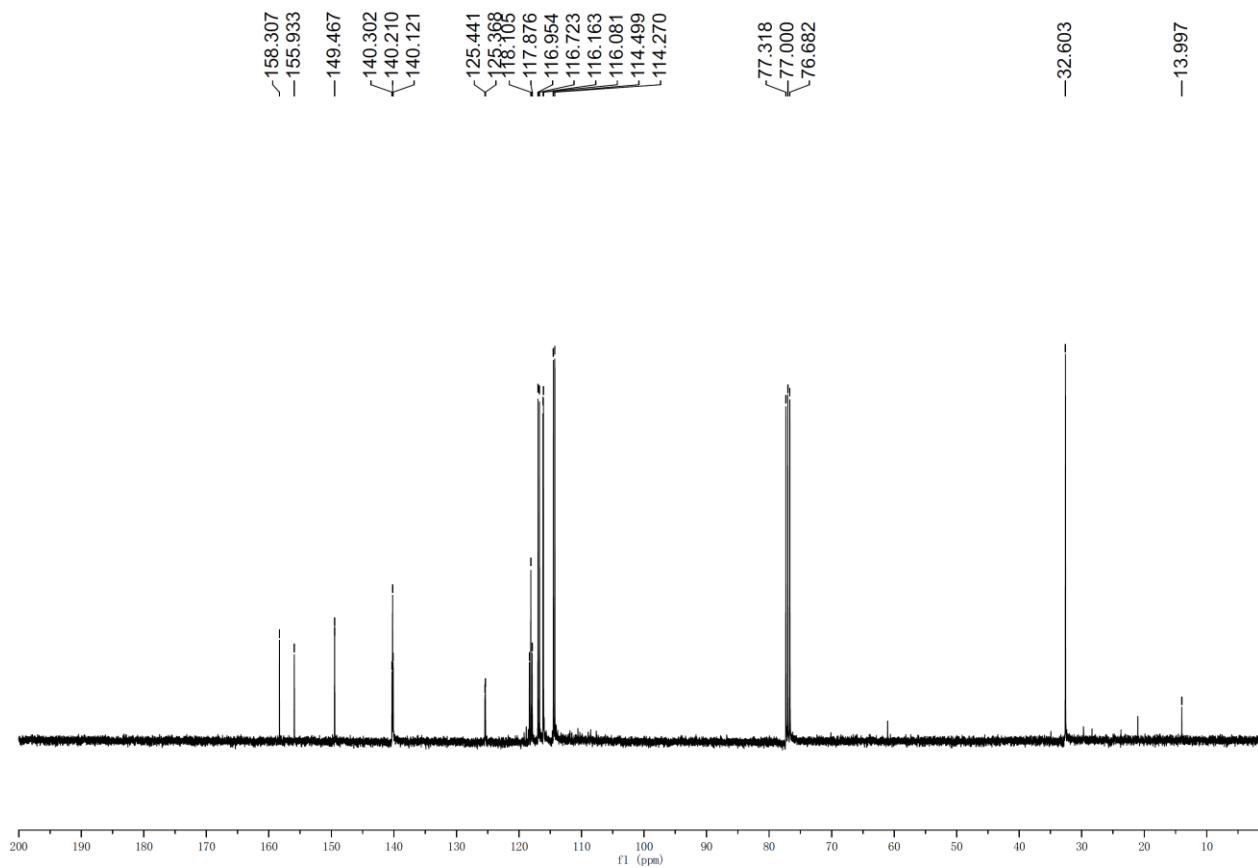

**(E)-N-(4-hydroxy-3-(4,4,5,5,6,6,7,7,7-nonafluorohept-2-en-1-yl)phenyl)acetamide (6p).**

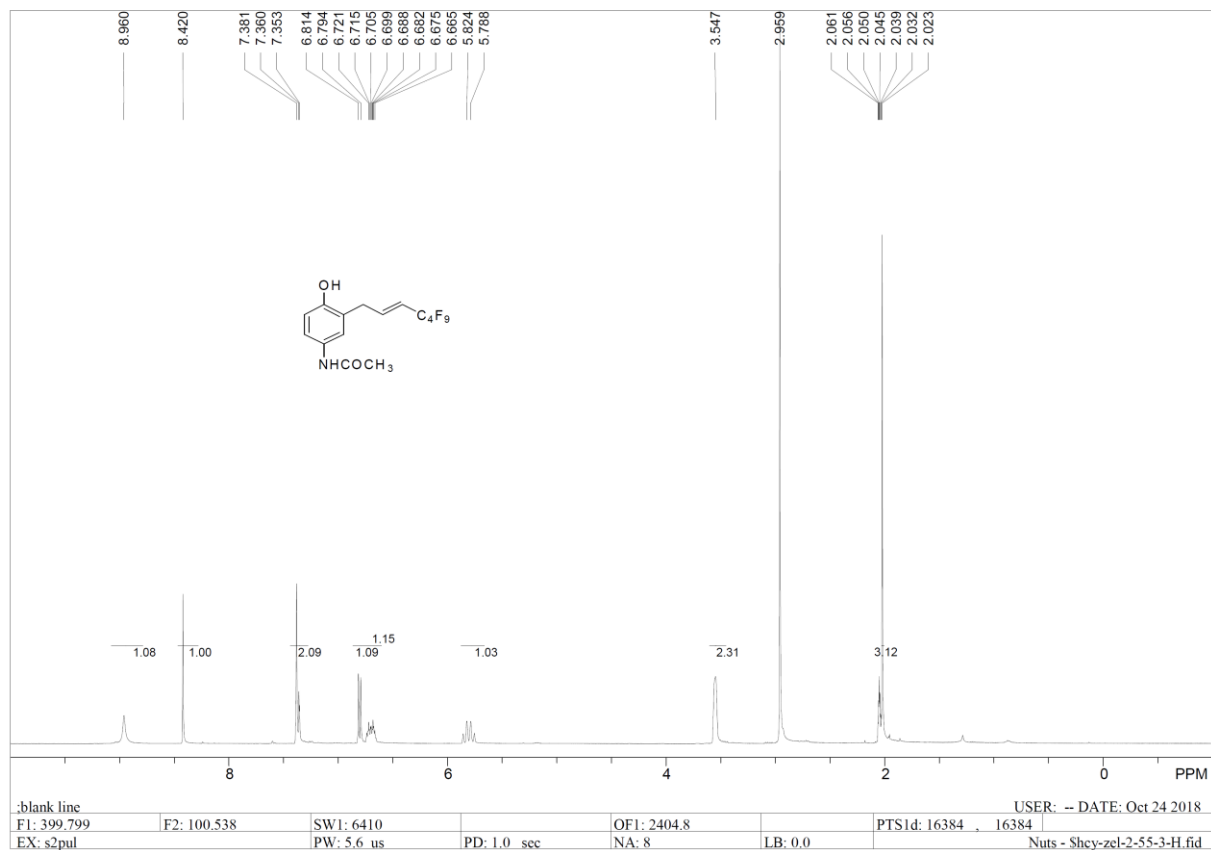

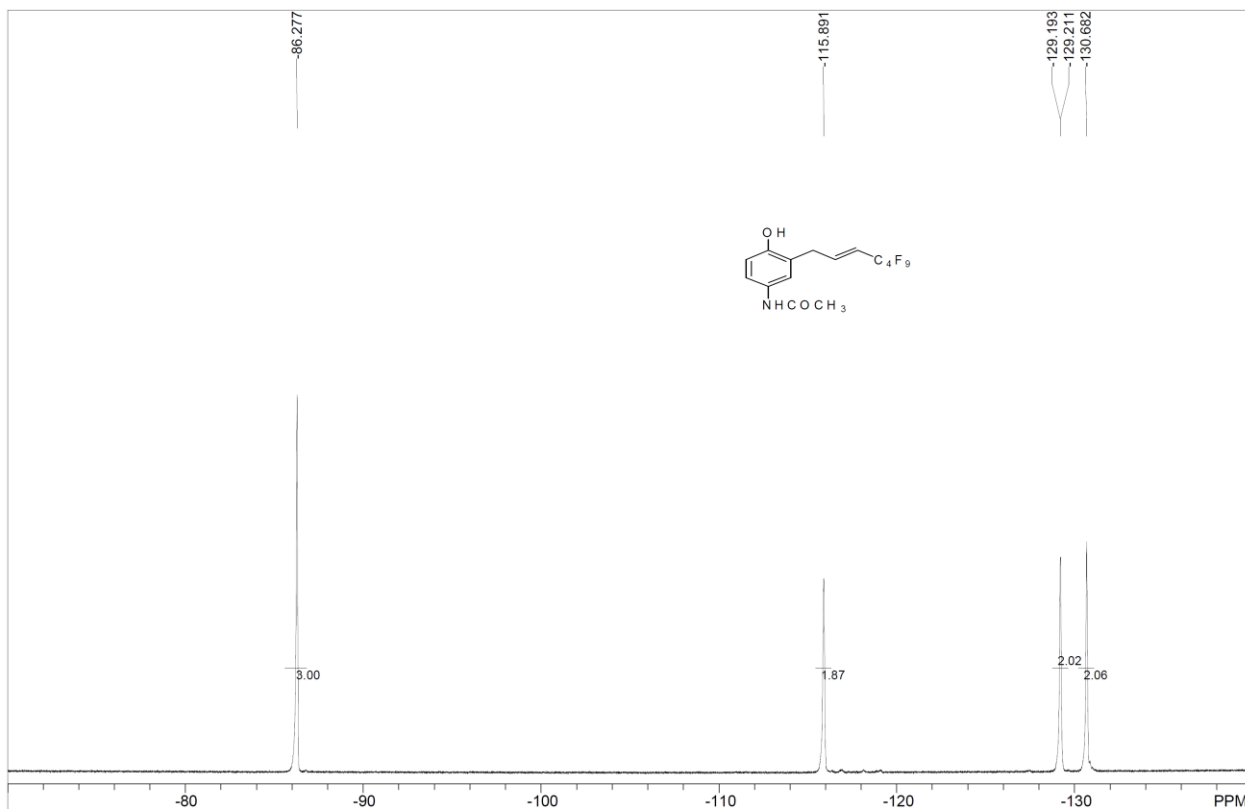

STANDARD FLUORINE PARAMETERS  
 F1: 376.152 F2: 100.538 SW1: 89286 OF1: -31975.7 USER: -- DATE: Oct 8 2018  
 EX: s2pul PW: 3.2 us PD: 1.0 sec NA: 4 LB: 0.0 PTS1d: 65536 65536  
 Nuts - Shey-zel-2-55-3-F.fid

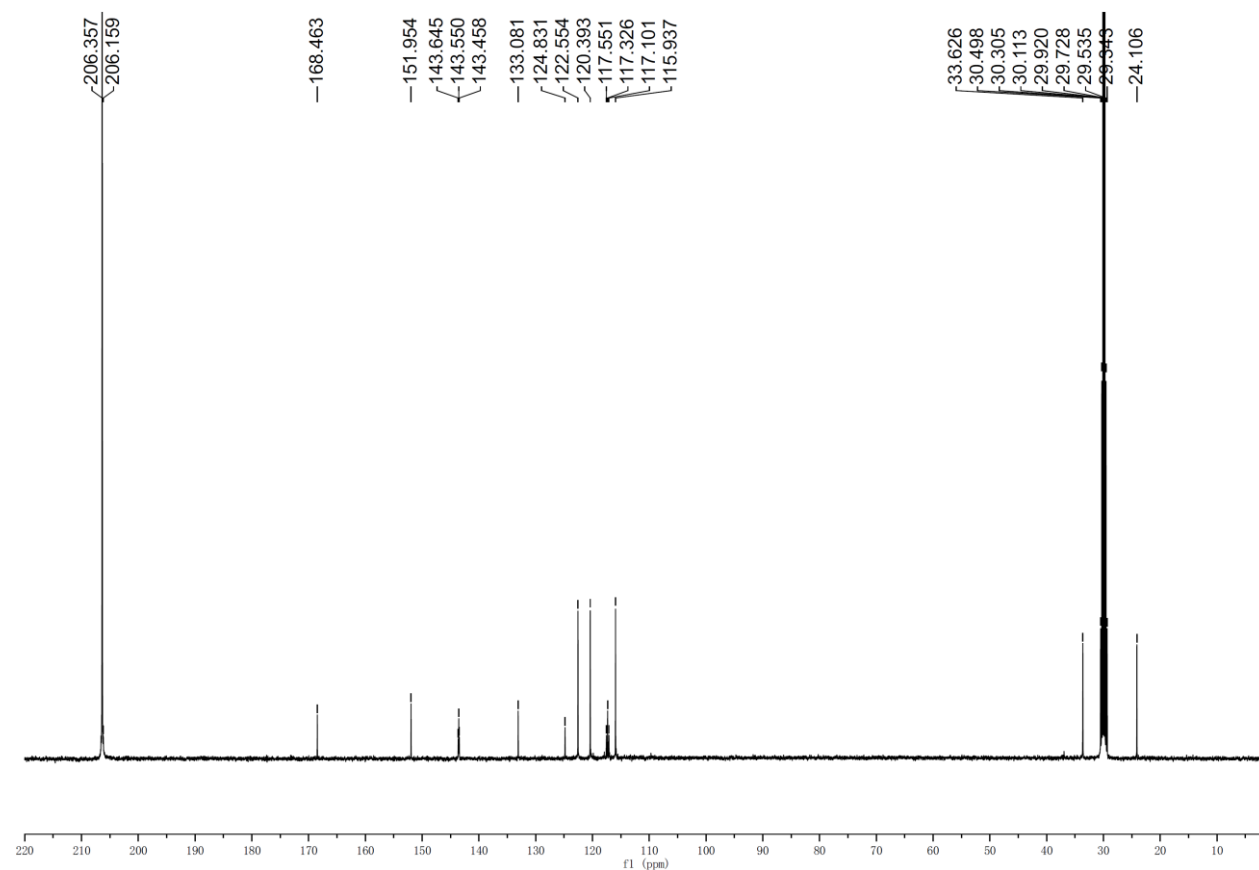

**(E)-1-(4-hydroxy-3-(4,4,5,5,6,6,7,7,7-nonafluorohept-2-en-1-yl)phenyl)ethan-1-one (6q).**

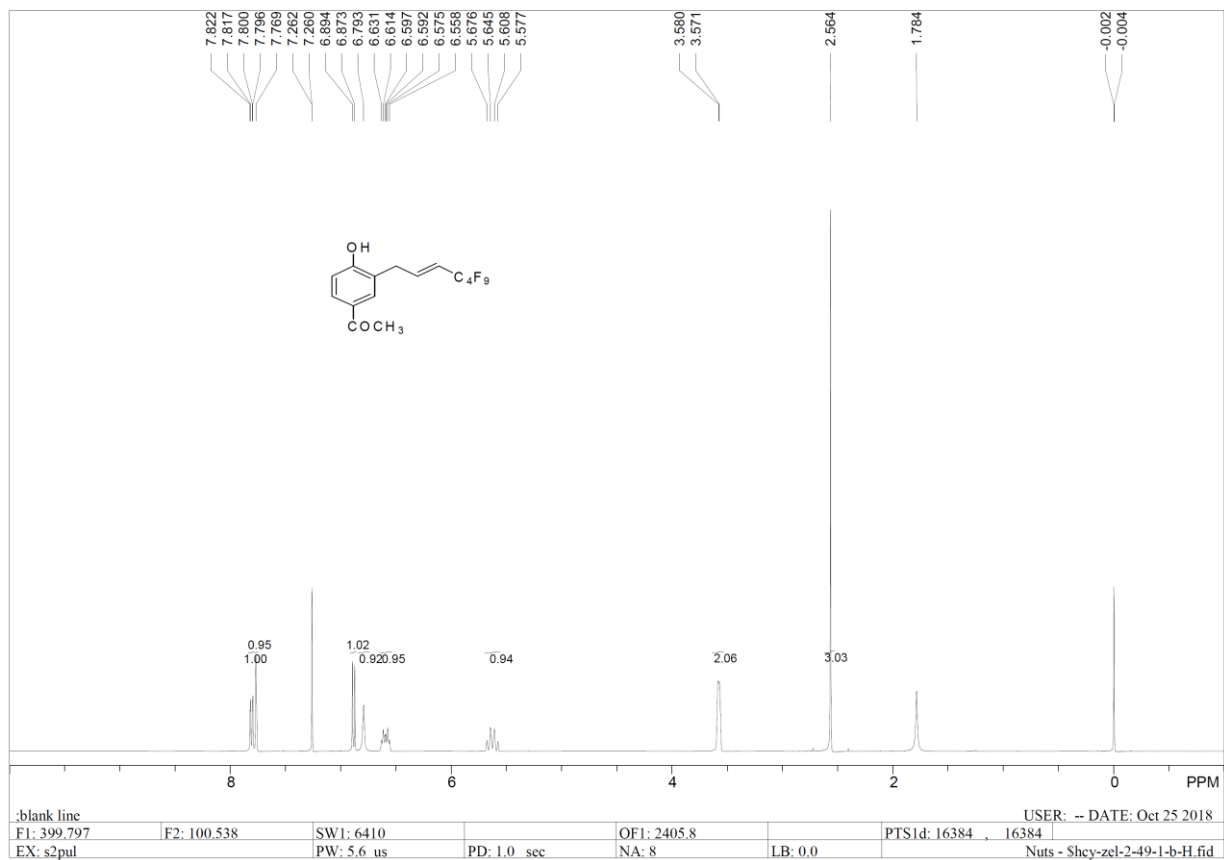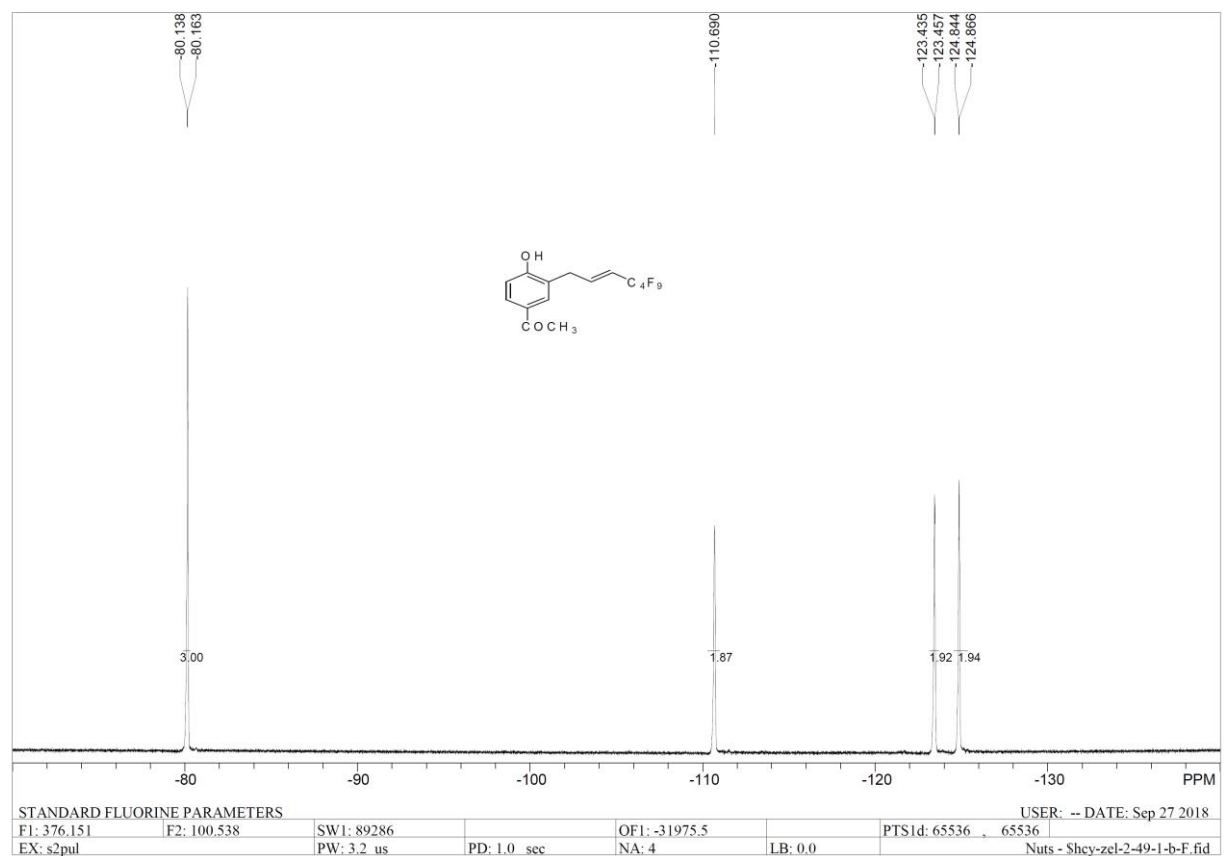

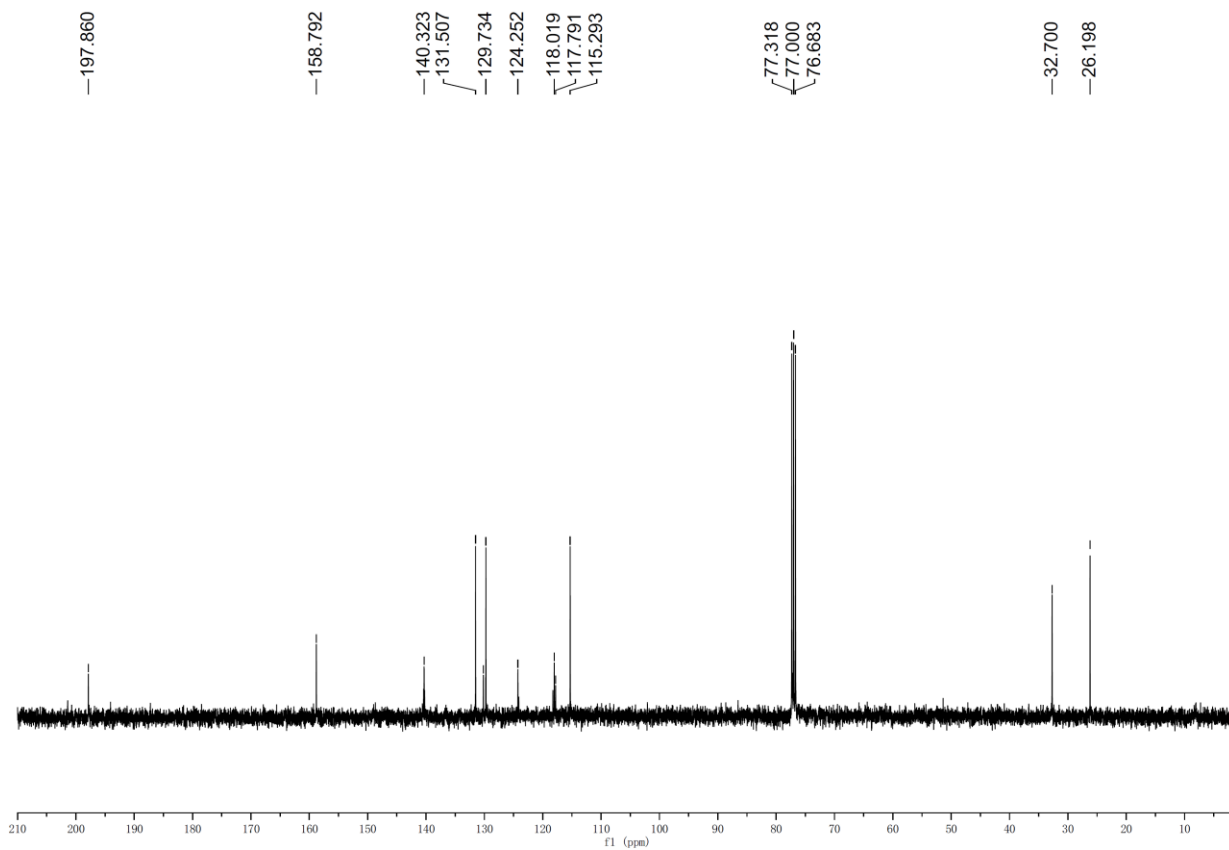

**Ethyl 3-(2,3-dihydrobenzofuran-2-yl)-2,2-difluoroacetate (7a).**

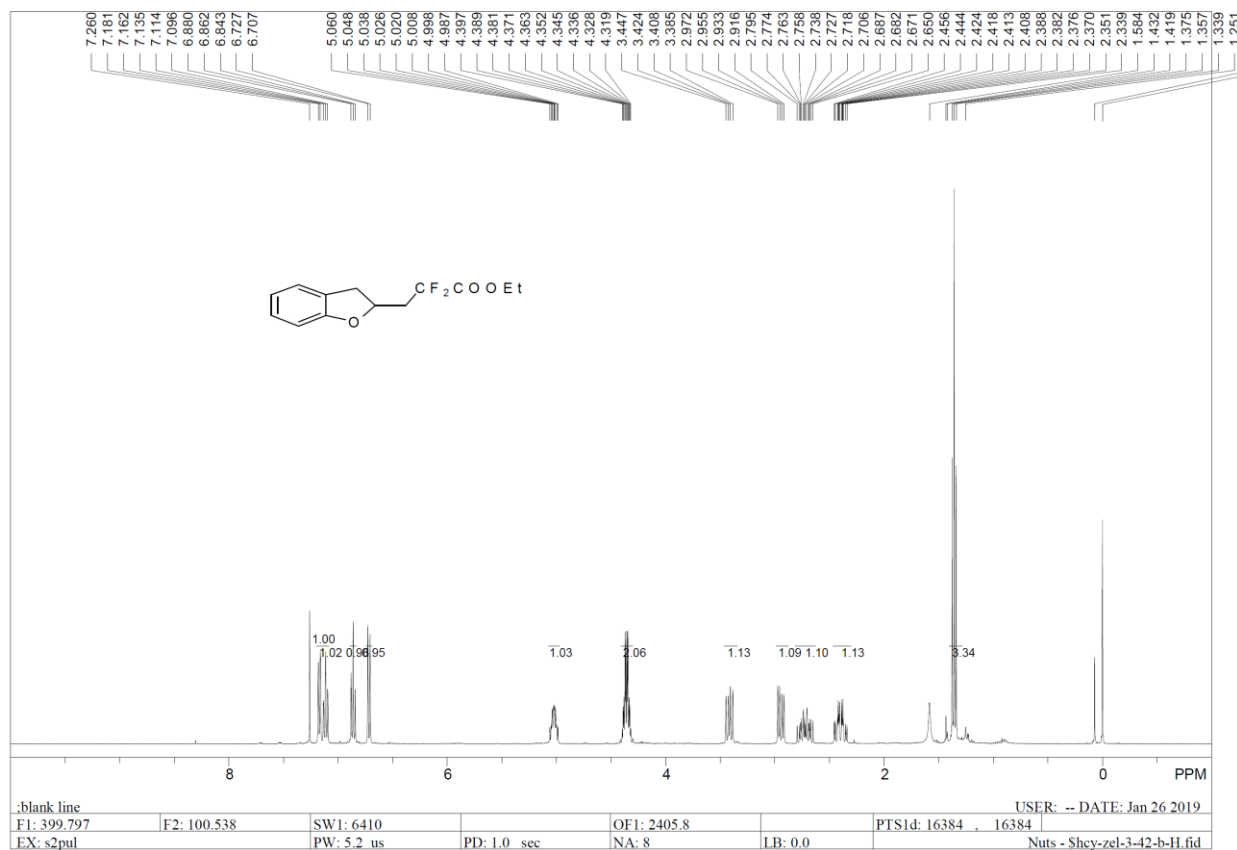

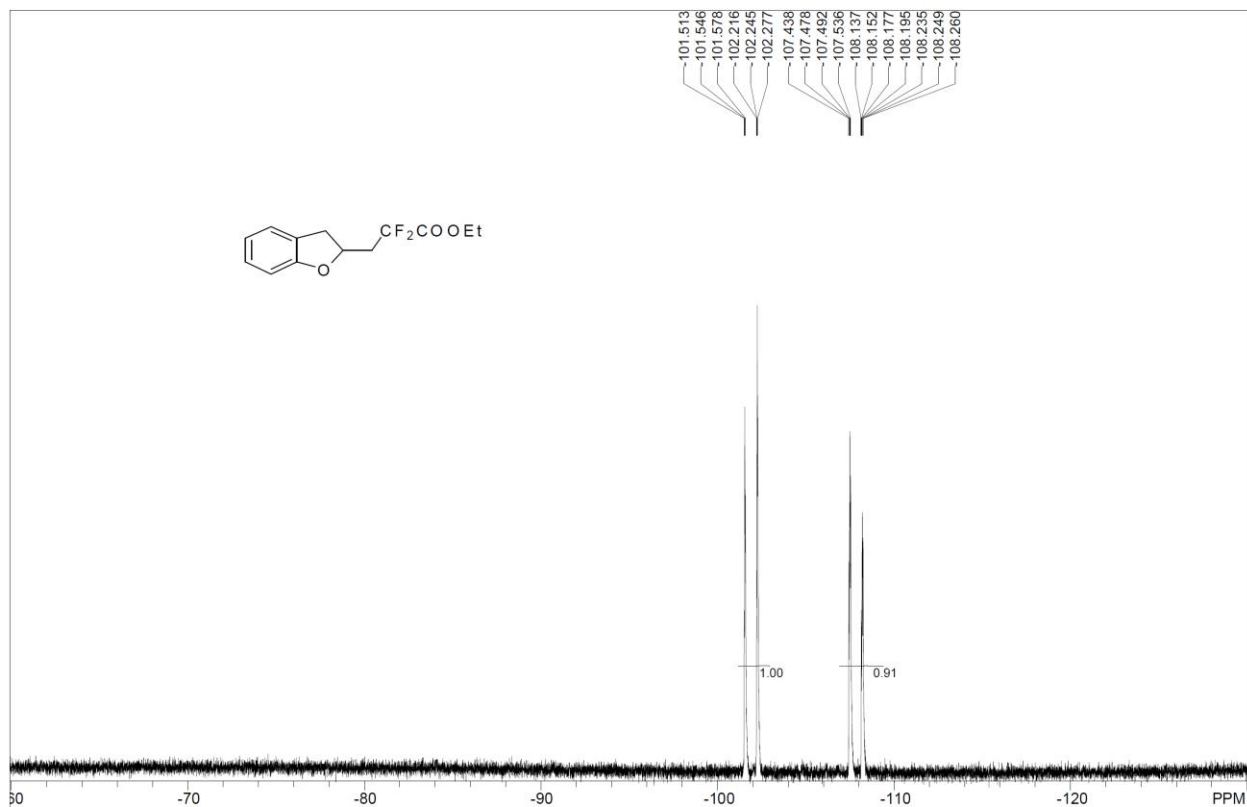

STANDARD FLUORINE PARAMETERS USER: -- DATE: Jan 22 2019

|             |             |             |               |              |                              |
|-------------|-------------|-------------|---------------|--------------|------------------------------|
| F1: 376.151 | F2: 100.538 | SW1: 89286  | OF1: -31975.5 | PTS1d: 65536 | 65536                        |
| EX: s2pul   | PW: 3.2 us  | PD: 1.0 sec | NA: 4         | LB: 0.0      | Nuts - Shey-zel-3-42-b-F.fid |

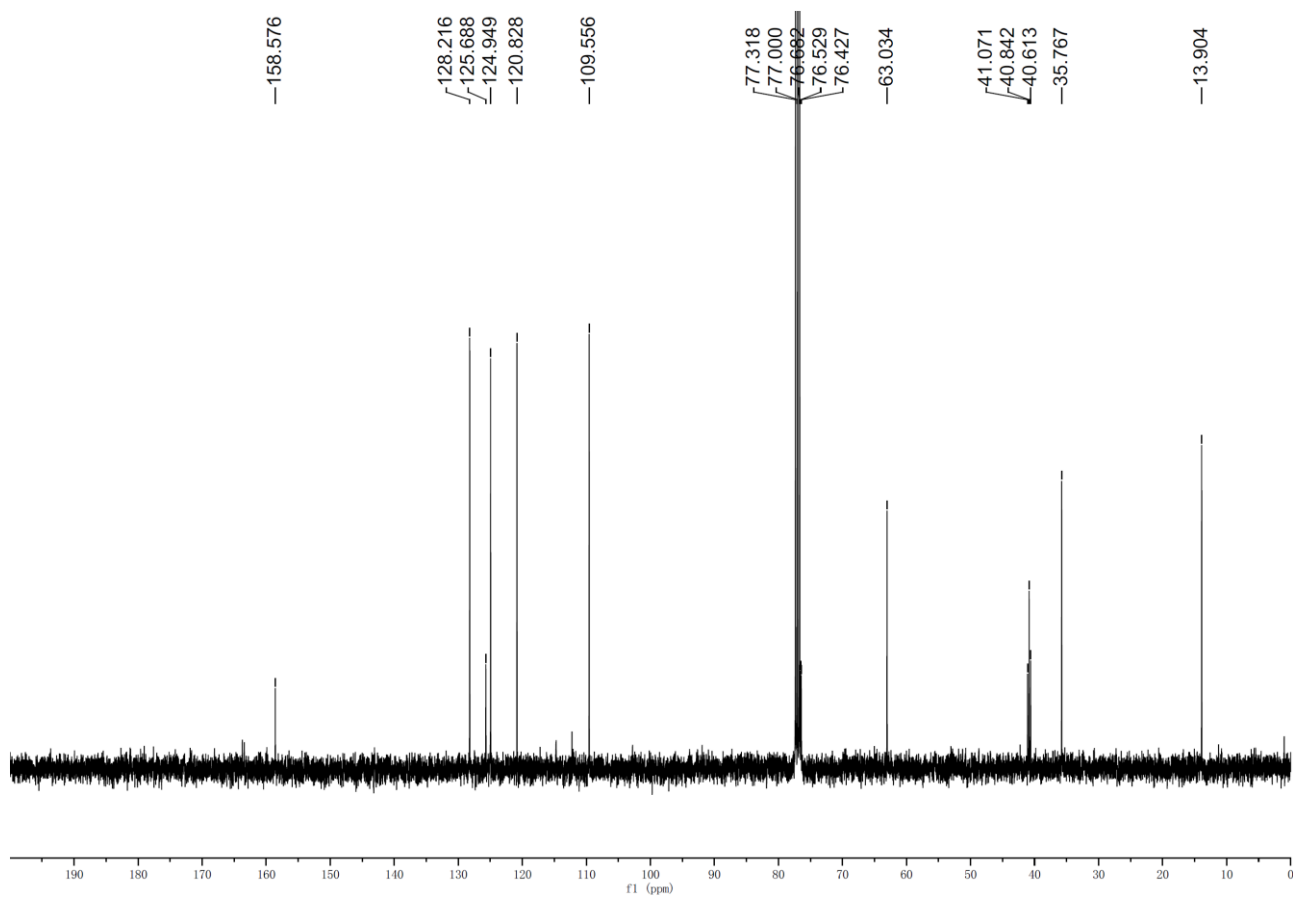

**Ethyl 3-(5-chloro-2,3-dihydrobenzofuran-2-yl)-2,2-difluoropropanoate (7b).**

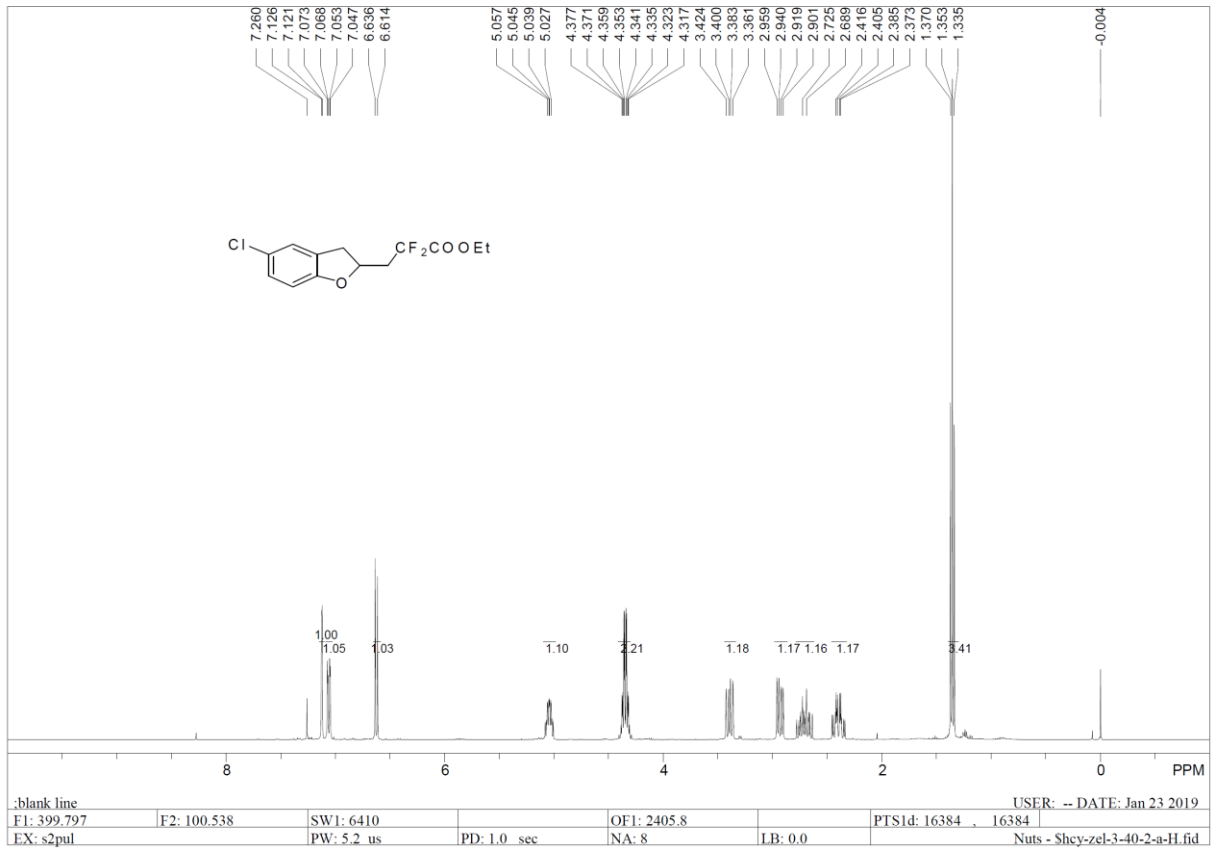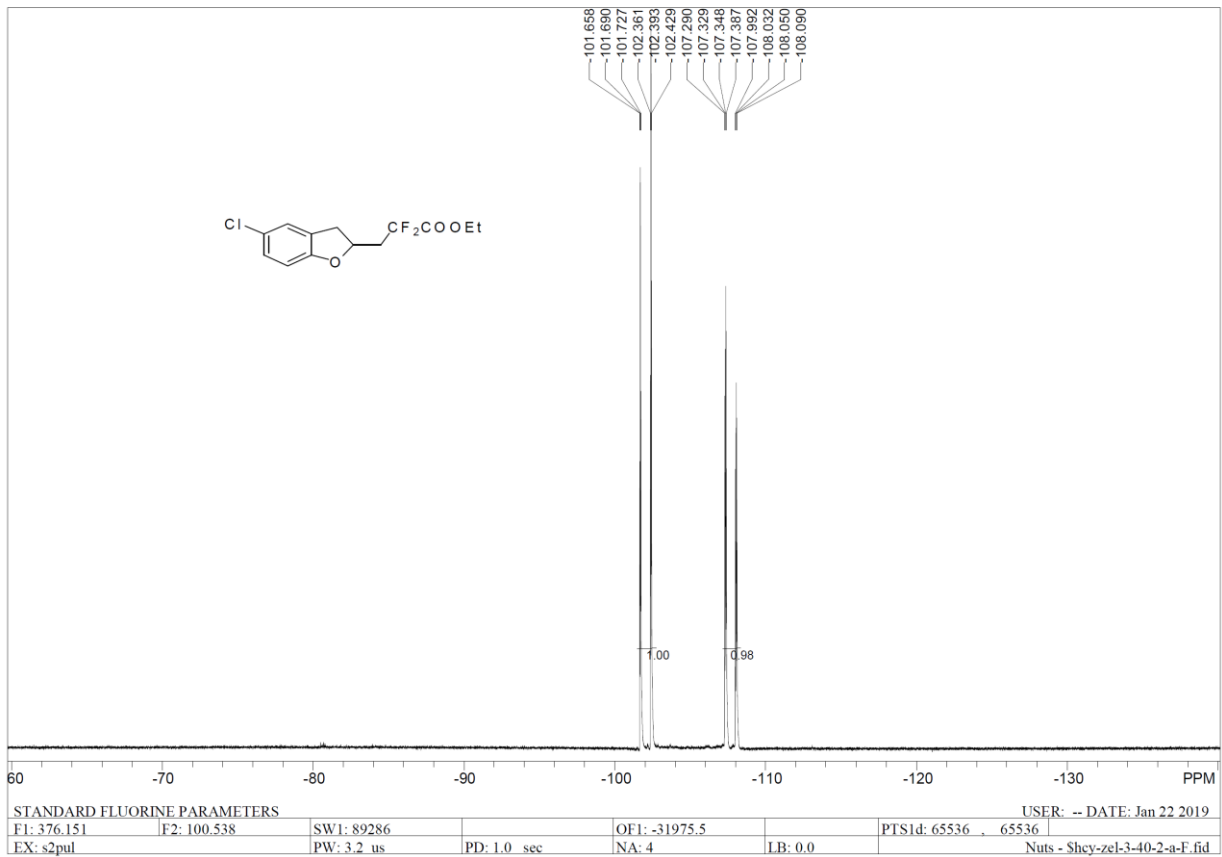



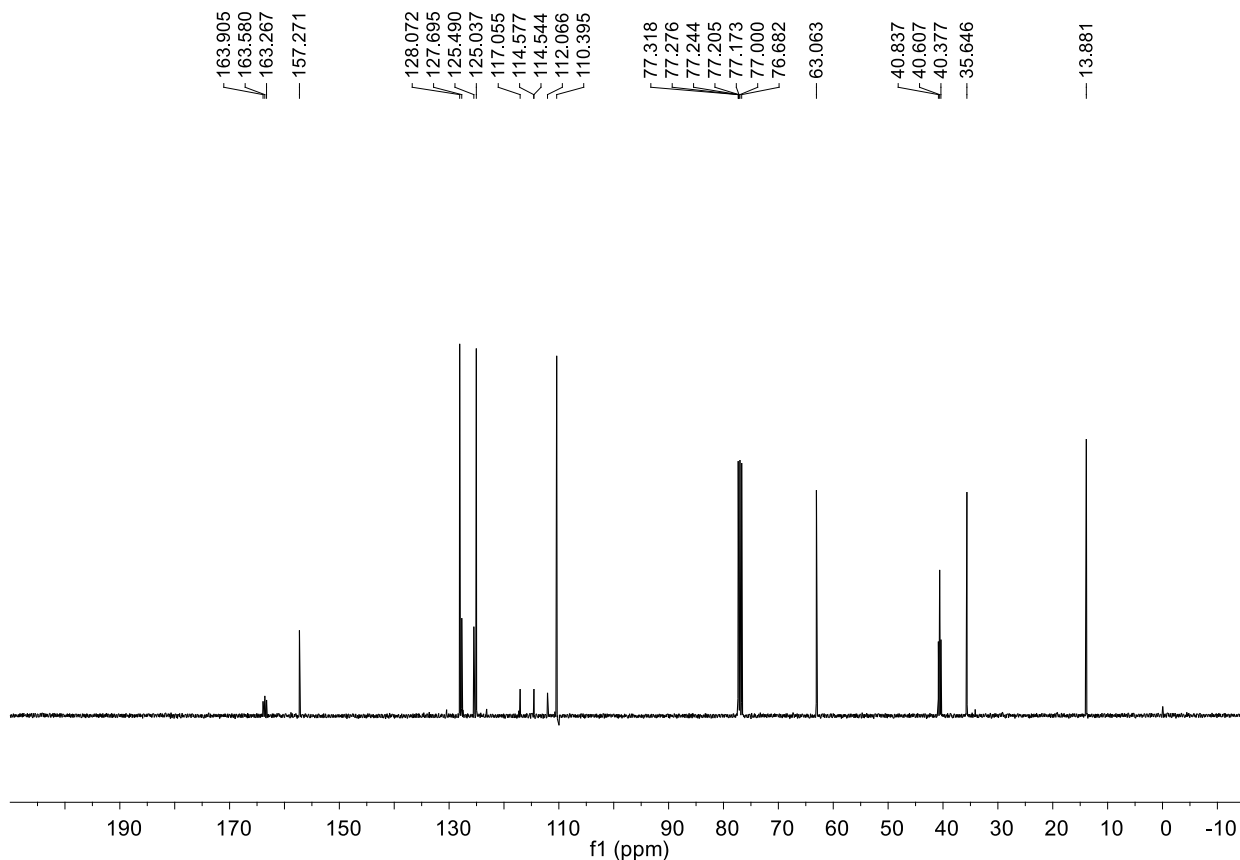

**Ethyl 2,2-difluoro-3-(5-formyl-2,3-dihydrobenzofuran-2-yl)propanoate (7c).**

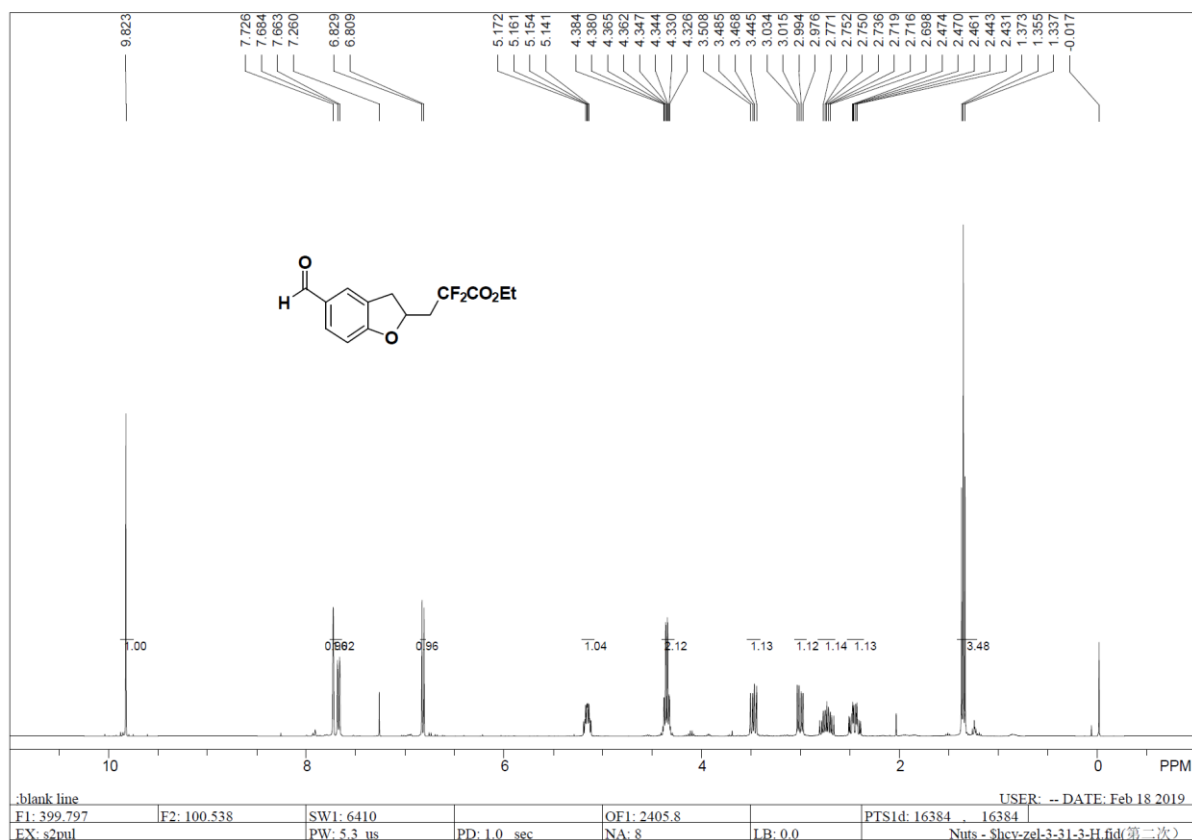

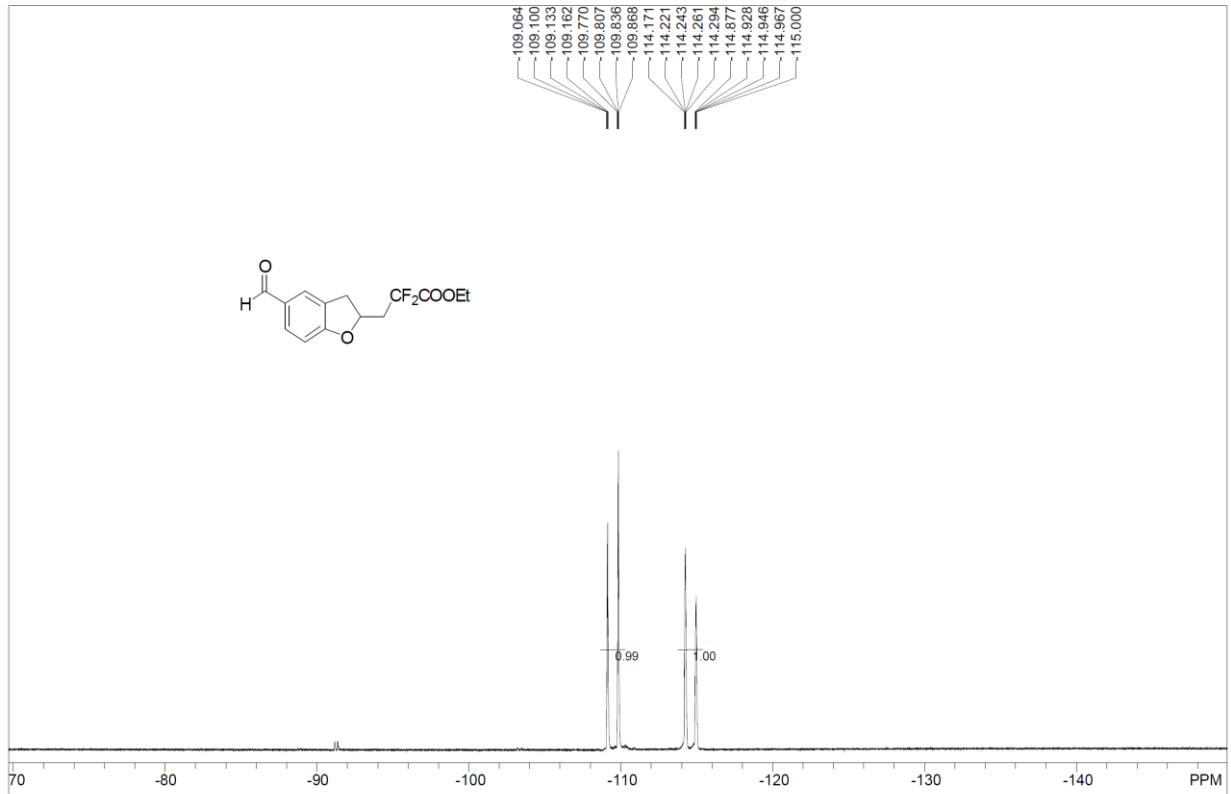

| STANDARD FLUORINE PARAMETERS |             |            |             |               | USER: -- DATE: Jan 4 2019 |                              |
|------------------------------|-------------|------------|-------------|---------------|---------------------------|------------------------------|
| F1: 376.153                  | F2: 100.538 | SW1: 89286 | PD: 1.0 sec | OF1: -31975.8 | PTS1d: 65536              | 65536                        |
| EX: s2pul                    |             | PW: 3.2 us |             | NA: 4         | LB: 0.0                   | Nuts - Shcy-zel-3-31-3-F.fid |

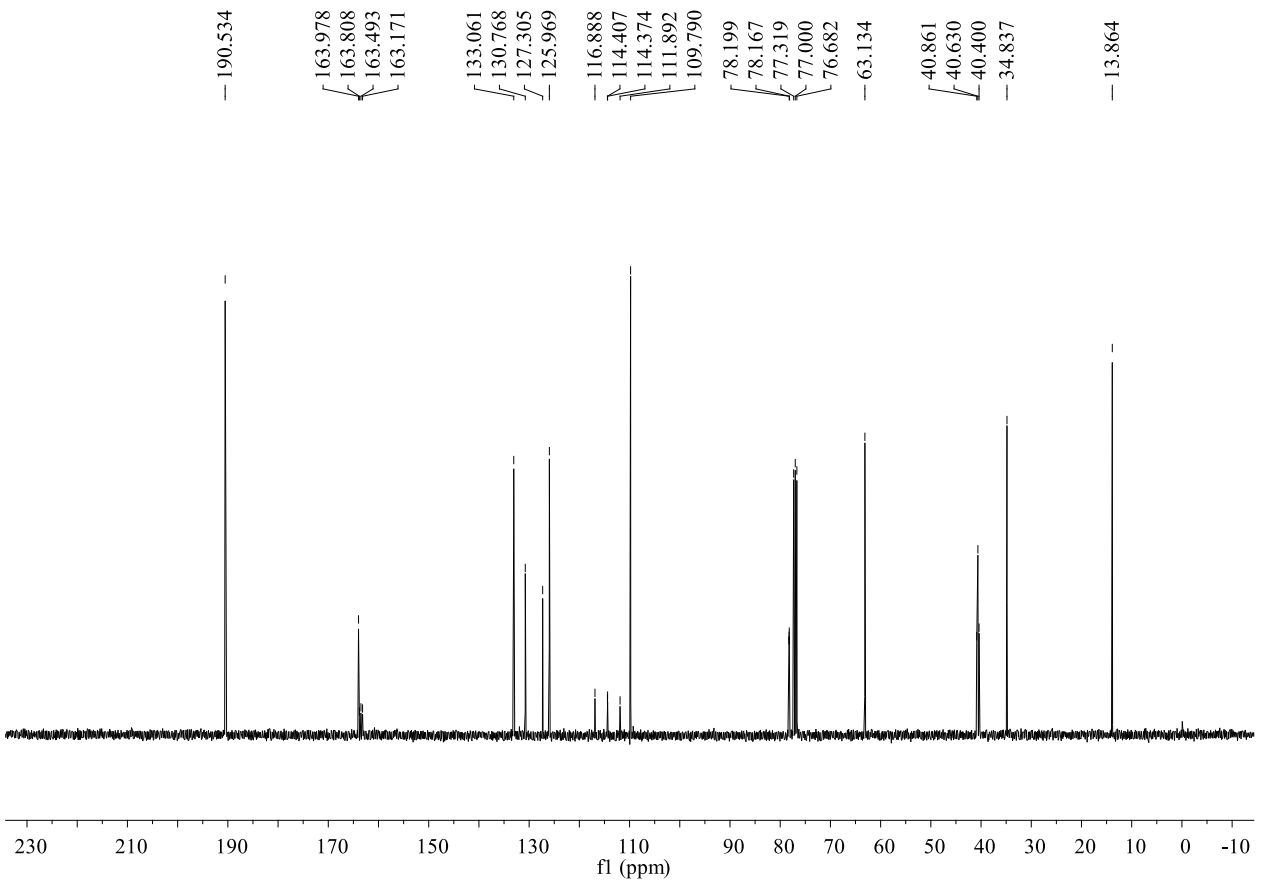

**Ethyl 3-(5-acetyl-2,3-dihydrobenzofuran-2-yl)-2,2-difluoropropanoate (7d).**

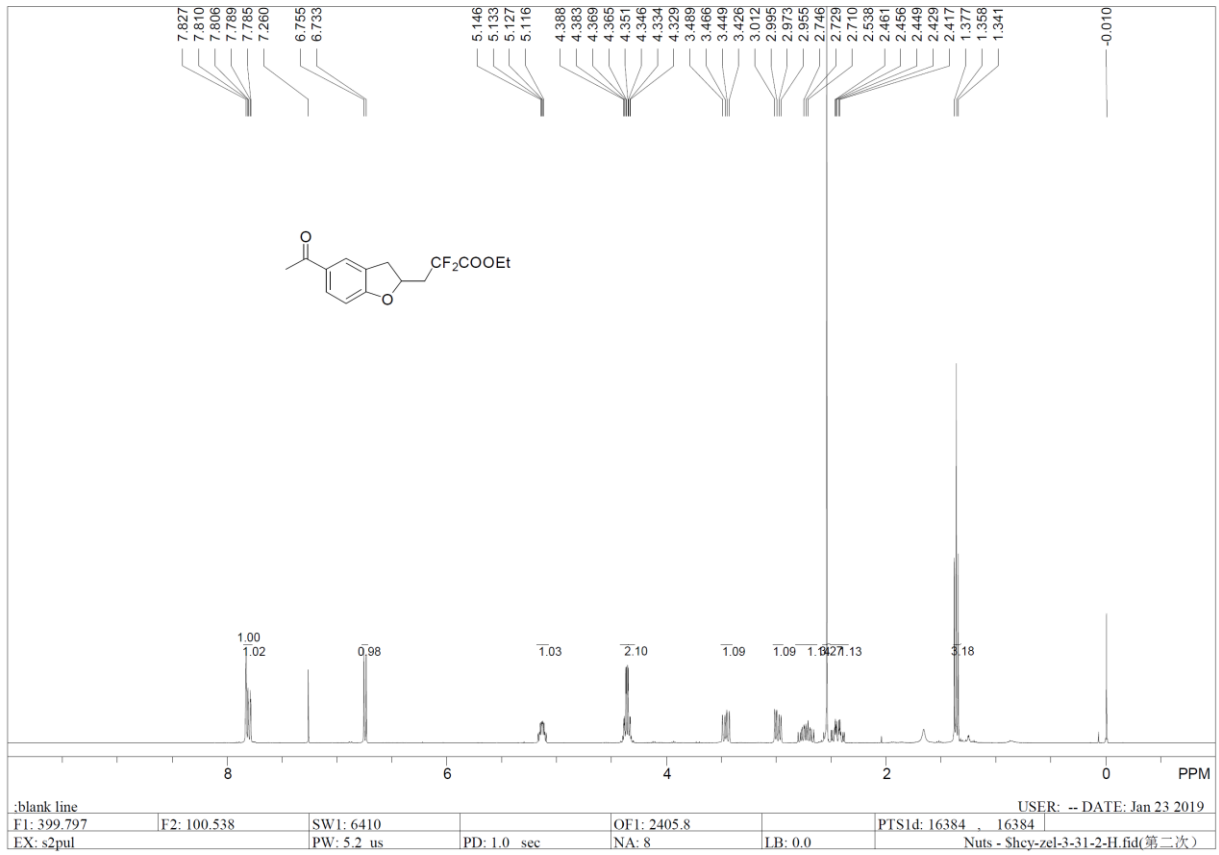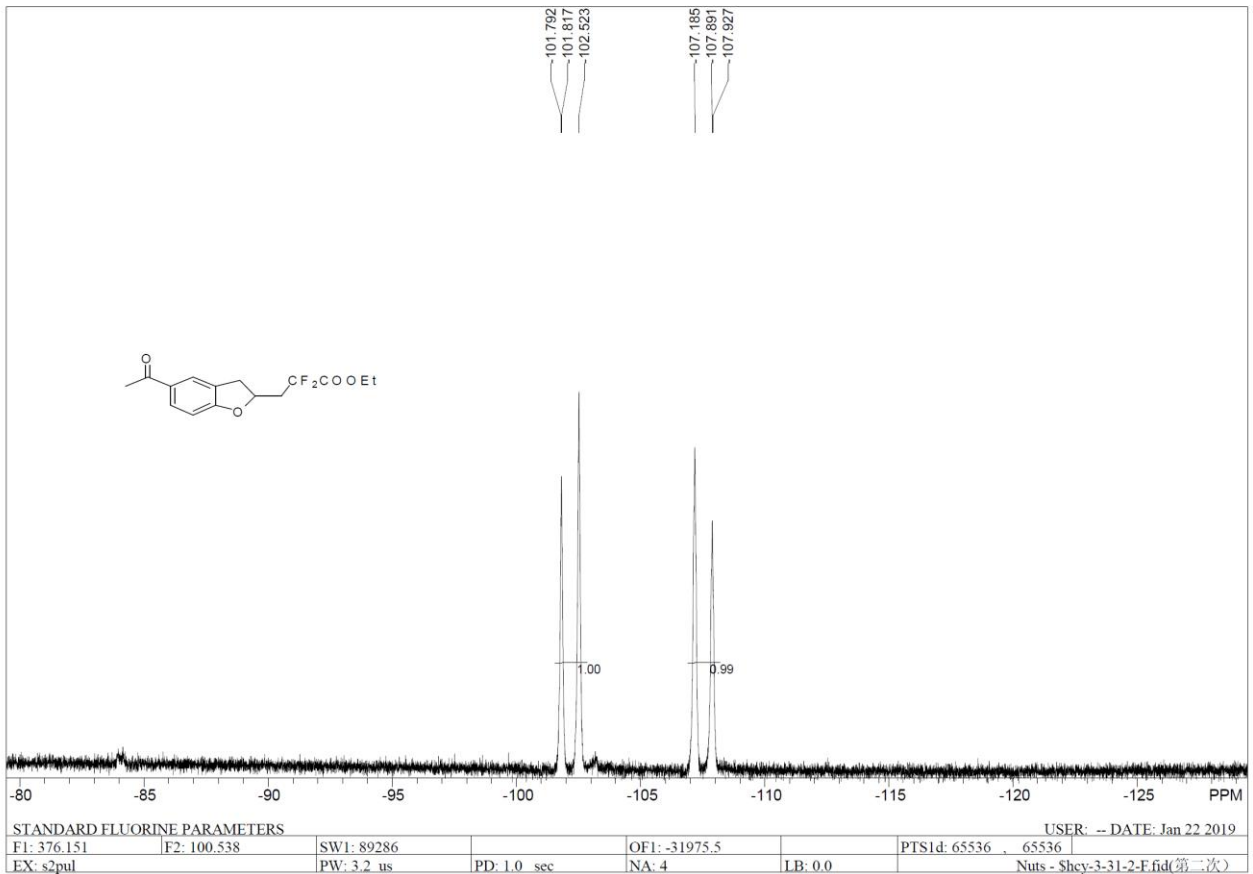

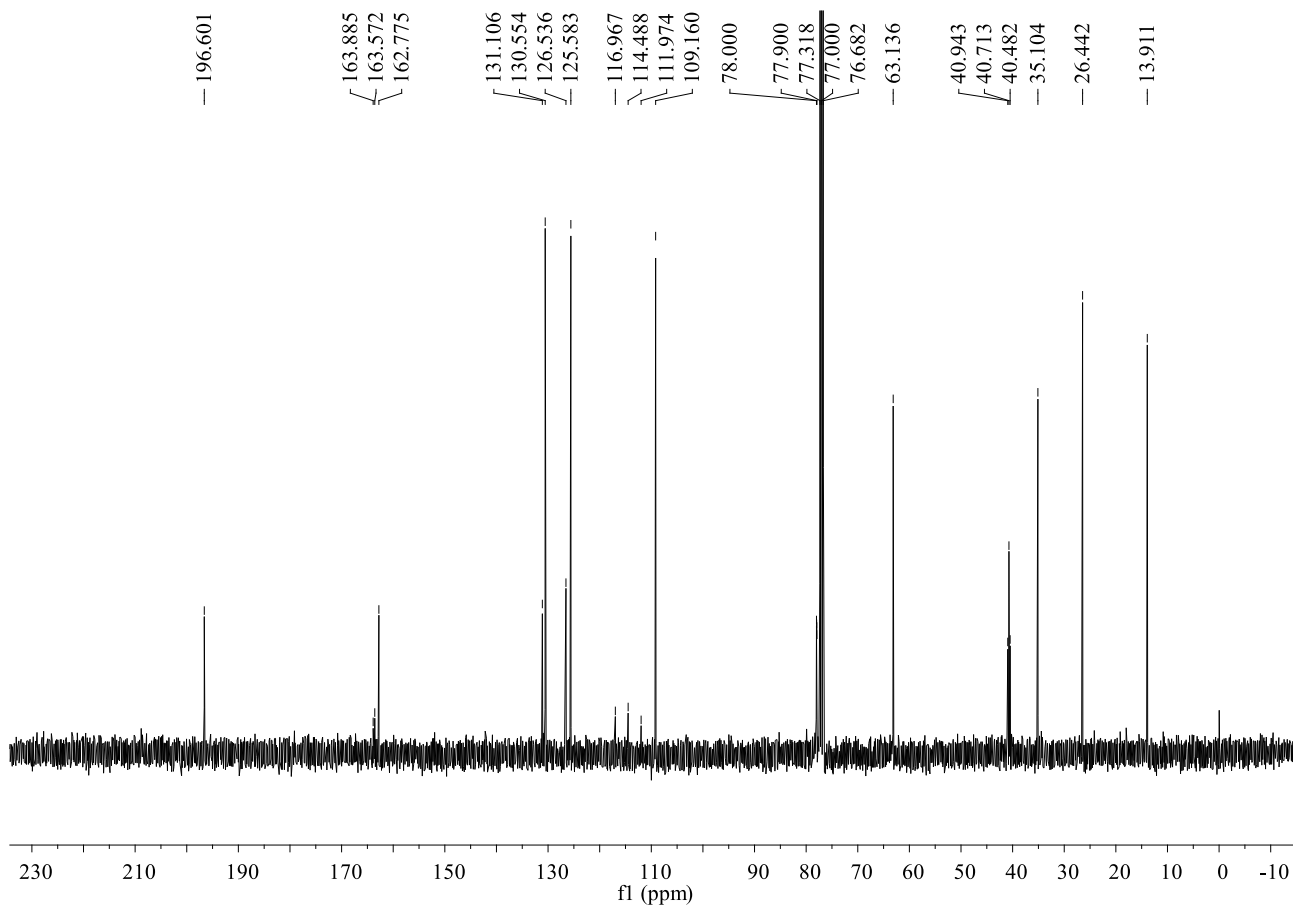

**Ethyl 2,2-difluoro-3-(7-methoxy-2,3-dihydrobenzofuran-2-yl)propanoate (7e).**

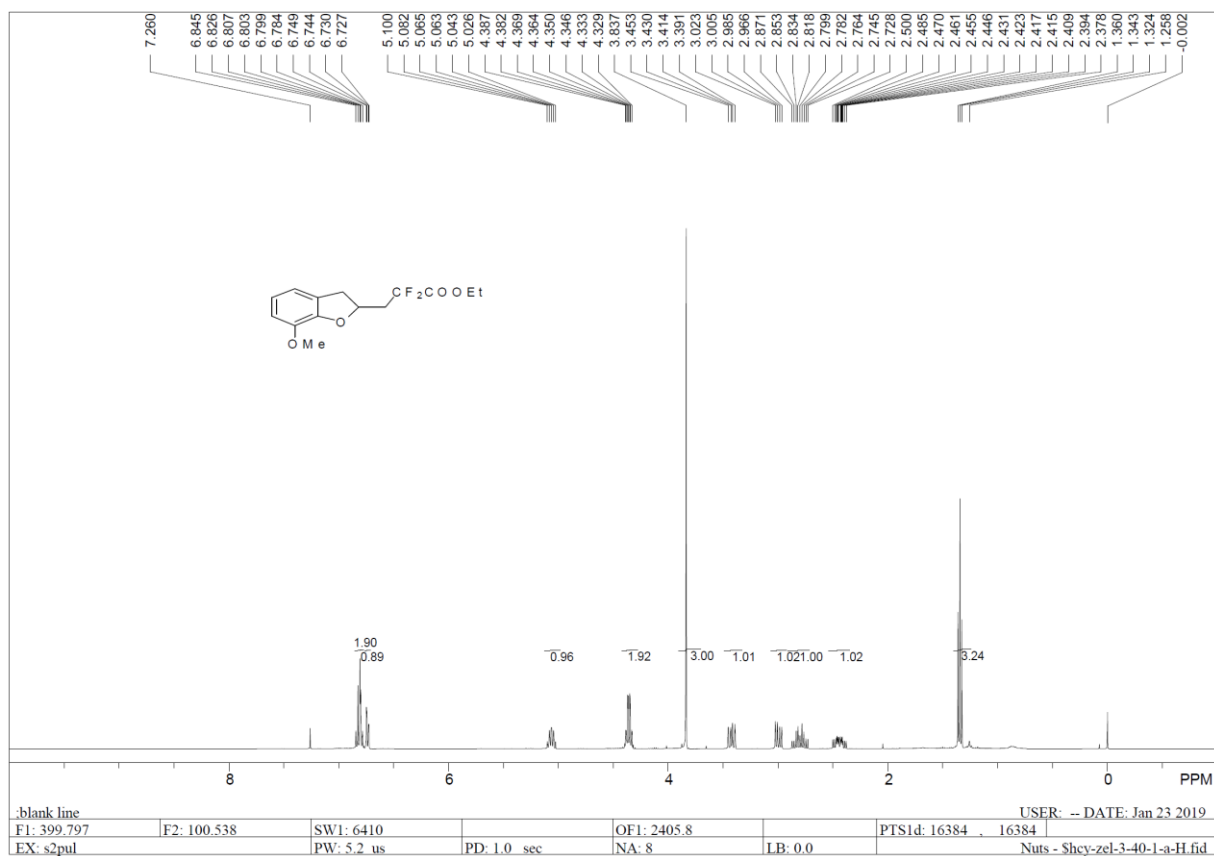

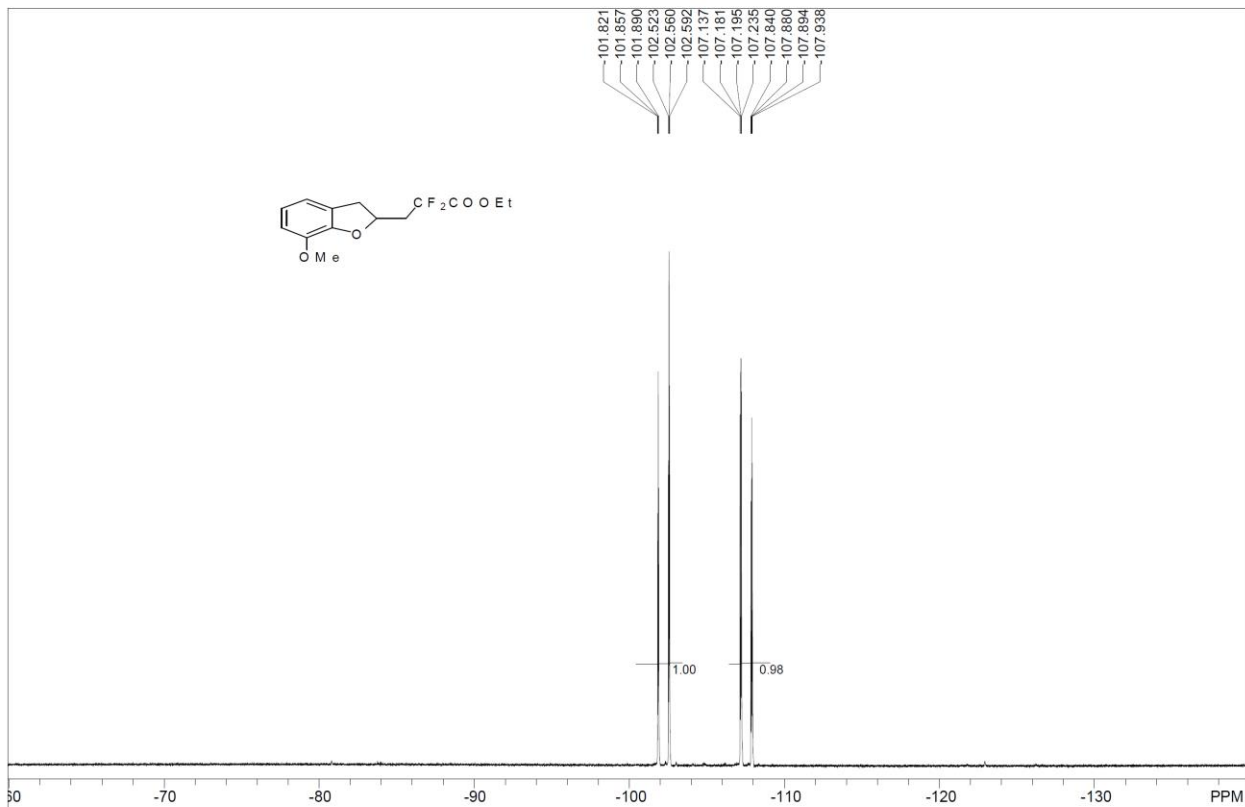

| STANDARD FLUORINE PARAMETERS |             |            |               |              |         | USER: -- DATE: Jan 22 2019     |  |
|------------------------------|-------------|------------|---------------|--------------|---------|--------------------------------|--|
| F1: 376.151                  | F2: 100.538 | SW1: 89286 | OF1: -31975.5 | PTS1d: 65536 | 65536   |                                |  |
| EX: s2pul                    |             | PW: 3.2 us | PD: 1.0 sec   | NA: 4        | LB: 0.0 | Nuts - Shcy-zel-3-40-1-a-F.fid |  |

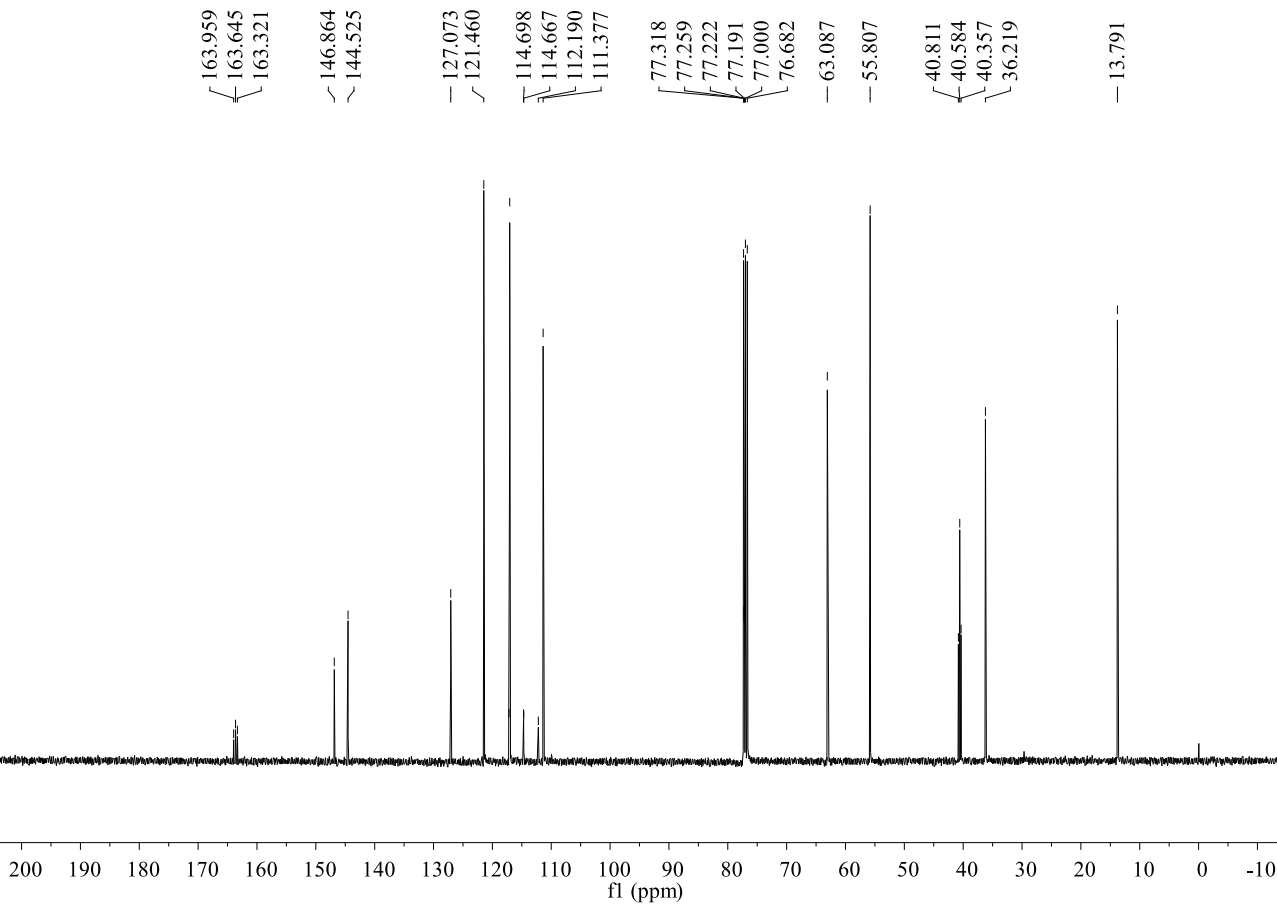

Supplement: c9cc06587c1.pdf [file c9cc06587c1.pdf]
